# Supplementary material for: Comprehensive genomic resources related to domestication and crop improvement traits in Lima bean
Source: Research Square preprint supplement (doi:10.21203/rs.3.rs-95762/v1), 2020-10-28
Supplement: Supplementary file 5 [file 6c2868dc03f83167160f56ac.xlsx]

## Sheet: Sheet1
Class	Number of elements	Length	Percentage of sequence
SINE	2299	231813	0.0004
LINE	24691	7861362	0.0144
LTR	322004	174499500	0.3194
DNA	72189	25254401	0.0462
Unclassified	30886	6025684	0.011
Total interspersed repeats	452069	213872760	0.3914
Simple repeats	163489	9028075	0.0165
Low complexity	41370	2333561	0.0043
