# Supplementary material for: Comprehensive genomic resources related to domestication and crop improvement traits in Lima bean
Source: Research Square preprint supplement (doi:10.21203/rs.3.rs-95762/v1), 2020-10-28
Supplement: Supplementary file 9 [file ac063b10006c4d3455d5060c.xlsx]

## Sheet: Sheet1
Trait	QTL Peak	LOD	% variation explained	QTL effect	XP-CLR score
Determinacy	Pl01_42432553	78.6	78.7086	--	13.24
Hundred Seed Weight (g)	Pl10_39674709	8.32	12.48	6.16	170.01
	Pl03_26637359	4.3	6.2	3.69	3.57
	Pl09_6453659	3.66	5.23	3.36	90.31
	Pl04_2884774	3.28	4.68	3.4	7.31
Flowering Time	Pl01_42432553	9.8	29.9079	5.266	13.24
Cyanogenesis (nM/min)	Pl05_35651614	68.3	93.2641	11.7385	12.39
	Pl10_44773521	9.98	2.7913	3.162	16.17
	Pl08_2715645	5.98	1.5251	-1.228	16.26
seed coat color	Pl07_46475134	11.6	20.3386	--	5.24
	Pl07_45067785	4.5	8.47527	--	60.64
