# Supplementary material for: Comprehensive genomic resources related to domestication and crop improvement traits in Lima bean
Source: Research Square preprint supplement (doi:10.21203/rs.3.rs-95762/v1), 2020-10-28
Supplement: Supplementary file 10 [file c11de0ebc0bd5642309c407d.xlsx]

## Sheet: Sheet1
Sample	N	HE	HO	FIS	Founder effect
All samples	454	0.32	0.033	0.85
Wild	250	0.228	0.053	0.76
Domesticated	204	0.172	0.006	0.95	0.25
Wild MI	110	0.128	0.081	0.53
Dom MI	154	0.057	0.01	0.68	0.55
Dom MI (without landraces from Yucatan Peninsula)	93	0.0654	0.01	0.68
Dom MI (only landraces from Yucatan Peninsula)	61	0.029	0.007	0.8
Wild AI	8	0.04	0.016	0.59
Dom AI	34	0.043	0.006	0.84	0
Wild AII	18	0.052	0.009	0.7
Wild MII	107	0.133	0.032	0.62
Dom AII	2	0.111	0.029	0.58
Dom MII	14	0.136	0.007	0.94
Wild AI (Guatemala)	7	0.053	0.003	0.93
N: number of accessions
HE: expected heterozygosity,
HO: observed heterozygosity
FIS: endogamy index measured as mean over all loci
Founder effect: reduction in genetic diversity due to domestication measured as the percent difference in HE between wild and domesticated accessions
