# Supplementary material for: Comprehensive genomic resources related to domestication and crop improvement traits in Lima bean
Source: Research Square preprint supplement (doi:10.21203/rs.3.rs-95762/v1), 2020-10-28
Supplement: Supplementary file 13 [file 0ee7ff22a71d0b9a6ef94a55.xlsx]

## Sheet: Sheet1
Location					Annotation							Expression
Gene id	Chromosome	Start	End	Transcript ids	Domain locations	KEGG annotations	GO annotations from blast hits	PFAM id	GO annotations from PFAM hits	Top blastx hit	Top blastp hit	Wild T1 R1	Wild T1 R2	Wild T1 R3	Wild T2 R1	Wild T2 R2	Wild T2 R3	Dom T1 R1	Dom T1 R2	Dom T1 R3	Dom T2 R1	Dom T2 R2	Dom T2 R3
Pl01G0000001200.v1	Pl01	90940	93506	Pl01G0000001200.1.v1	113-1131[+]	.	GO:0010181^molecular_function^FMN binding`GO:0016491^molecular_function^oxidoreductase activity`GO:0031408^biological_process^oxylipin biosynthetic process	PF00724.21^Oxidored_FMN^NADH:flavin oxidoreductase / NADH oxidase family^17-349^E:2e-84	GO:0010181^molecular_function^FMN binding`GO:0016491^molecular_function^oxidoreductase activity`GO:0055114^biological_process^oxidation-reduction process	OPR11_ORYSJ^OPR11_ORYSJ^Q:158-1231,H:6-363^67.877%ID^E:0^RecName: Full=Putative 12-oxophytodienoate reductase 11;^Eukaryota; Viridiplantae; Streptophyta; Embryophyta; Tracheophyta; Spermatophyta; Magnoliopsida; Liliopsida; Poales; Poaceae; BOP clade; Oryzoideae; Oryzeae; Oryzinae; Oryza; Oryza sativa	OPR11_ORYSJ^OPR11_ORYSJ^Q:158-1231,H:6-363^67.877%ID^E:0^RecName: Full=Putative 12-oxophytodienoate reductase 11;^Eukaryota; Viridiplantae; Streptophyta; Embryophyta; Tracheophyta; Spermatophyta; Magnoliopsida; Liliopsida; Poales; Poaceae; BOP clade; Oryzoideae; Oryzeae; Oryzinae; Oryza; Oryza sativa	18	16	35	85	138	130	138	357	692	267	212	192
Pl01G0000001400.v1	Pl01	98908	101791	Pl01G0000001400.1.v1	316-1479[+]	KEGG:gmx:100037447`KO:K03781	GO:0005737^cellular_component^cytoplasm`GO:0009514^cellular_component^glyoxysome`GO:0004096^molecular_function^catalase activity`GO:0020037^molecular_function^heme binding`GO:0046872^molecular_function^metal ion binding`GO:0042744^biological_process^hydrogen peroxide catabolic process`GO:0042542^biological_process^response to hydrogen peroxide	PF00199.20^Catalase^Catalase^18-398^E:3.7e-172`PF06628.13^Catalase-rel^Catalase-related immune-responsive^423-486^E:1.3e-15	GO:0004096^molecular_function^catalase activity`GO:0020037^molecular_function^heme binding`GO:0055114^biological_process^oxidation-reduction process	CATA3_SOYBN^CATA3_SOYBN^Q:316-1791,H:1-492^95.732%ID^E:0^RecName: Full=Catalase-3;^Eukaryota; Viridiplantae; Streptophyta; Embryophyta; Tracheophyta; Spermatophyta; Magnoliopsida; eudicotyledons; Gunneridae; Pentapetalae; rosids; fabids; Fabales; Fabaceae; Papilionoideae; 50 kb inversion clade; NPAAA clade; indigoferoid/millettioid clade; Phaseoleae; Glycine; Glycine subgen. Soja	CATA3_SOYBN^CATA3_SOYBN^Q:316-1791,H:1-492^95.732%ID^E:0^RecName: Full=Catalase-3;^Eukaryota; Viridiplantae; Streptophyta; Embryophyta; Tracheophyta; Spermatophyta; Magnoliopsida; eudicotyledons; Gunneridae; Pentapetalae; rosids; fabids; Fabales; Fabaceae; Papilionoideae; 50 kb inversion clade; NPAAA clade; indigoferoid/millettioid clade; Phaseoleae; Glycine; Glycine subgen. Soja	139	66	73	1121	1781	1587	1437	2103	4751	2415	1711	1582
Pl01G0000002400.v1	Pl01	227752	230897	Pl01G0000002400.1.v1	59-1233[+]	KEGG:ath:AT1G76130`KO:K01176	GO:0005829^cellular_component^cytosol`GO:0005576^cellular_component^extracellular region`GO:0004556^molecular_function^alpha-amylase activity`GO:0103025^molecular_function^alpha-amylase activity (releasing maltohexaose)`GO:0005509^molecular_function^calcium ion binding`GO:0005975^biological_process^carbohydrate metabolic process	PF00128.25^Alpha-amylase^Alpha amylase, catalytic domain^45-112^E:5.6e-10`PF07821.13^Alpha-amyl_C2^Alpha-amylase C-terminal beta-sheet domain^353-409^E:6.6e-22	GO:0003824^molecular_function^catalytic activity`GO:0005975^biological_process^carbohydrate metabolic process`GO:0004556^molecular_function^alpha-amylase activity`GO:0005509^molecular_function^calcium ion binding	AMY2_ARATH^AMY2_ARATH^Q:74-1288,H:9-413^74.815%ID^E:0^RecName: Full=Probable alpha-amylase 2;^Eukaryota; Viridiplantae; Streptophyta; Embryophyta; Tracheophyta; Spermatophyta; Magnoliopsida; eudicotyledons; Gunneridae; Pentapetalae; rosids; malvids; Brassicales; Brassicaceae; Camelineae; Arabidopsis	AMY2_ARATH^AMY2_ARATH^Q:74-1288,H:9-413^74.815%ID^E:0^RecName: Full=Probable alpha-amylase 2;^Eukaryota; Viridiplantae; Streptophyta; Embryophyta; Tracheophyta; Spermatophyta; Magnoliopsida; eudicotyledons; Gunneridae; Pentapetalae; rosids; malvids; Brassicales; Brassicaceae; Camelineae; Arabidopsis	2243	1971	1837	3139	5111	4446	9507	14651	34758	6698	4961	4838
Pl01G0000003900.v1	Pl01	296424	296810	Pl01G0000003900.1.v1	1-387[+]	KEGG:ath:AT5G42200`KO:K19037	GO:0016021^cellular_component^integral component of membrane`GO:0046872^molecular_function^metal ion binding`GO:0004842^molecular_function^ubiquitin-protein transferase activity`GO:0071456^biological_process^cellular response to hypoxia`GO:0016567^biological_process^protein ubiquitination	PF13639.7^zf-RING_2^Ring finger domain^70-113^E:2.1e-13`PF17123.6^zf-RING_11^RING-like zinc finger^70-98^E:2.7e-10`PF13923.7^zf-C3HC4_2^Zinc finger, C3HC4 type (RING finger)^70-112^E:2.7e-08`PF00097.26^zf-C3HC4^Zinc finger, C3HC4 type (RING finger)^71-112^E:9.4e-06`PF13445.7^zf-RING_UBOX^RING-type zinc-finger^71-110^E:0.00024`PF12678.8^zf-rbx1^RING-H2 zinc finger domain^86-113^E:1.8e-07	GO:0046872^molecular_function^metal ion binding`GO:0008270^molecular_function^zinc ion binding	ATL23_ARATH^ATL23_ARATH^Q:1-384,H:28-163^49.265%ID^E:2.58e-40^RecName: Full=E3 ubiquitin-protein ligase ATL23;^Eukaryota; Viridiplantae; Streptophyta; Embryophyta; Tracheophyta; Spermatophyta; Magnoliopsida; eudicotyledons; Gunneridae; Pentapetalae; rosids; malvids; Brassicales; Brassicaceae; Camelineae; Arabidopsis	ATL23_ARATH^ATL23_ARATH^Q:1-384,H:28-163^49.265%ID^E:2.58e-40^RecName: Full=E3 ubiquitin-protein ligase ATL23;^Eukaryota; Viridiplantae; Streptophyta; Embryophyta; Tracheophyta; Spermatophyta; Magnoliopsida; eudicotyledons; Gunneridae; Pentapetalae; rosids; malvids; Brassicales; Brassicaceae; Camelineae; Arabidopsis	64	92	54	241	350	381	61	84	257	455	326	237
Pl01G0000004400.v1	Pl01	323865	325669	Pl01G0000004400.1.v1	20-1227[+]	KEGG:ath:AT1G20180	GO:0016021^cellular_component^integral component of membrane	PF05055.13^DUF677^Protein of unknown function (DUF677)^93-404^E:1.4e-21	.	U496K_ARATH^U496K_ARATH^Q:149-1234,H:14-386^42.246%ID^E:6.72e-73^RecName: Full=UPF0496 protein At1g20180;^Eukaryota; Viridiplantae; Streptophyta; Embryophyta; Tracheophyta; Spermatophyta; Magnoliopsida; eudicotyledons; Gunneridae; Pentapetalae; rosids; malvids; Brassicales; Brassicaceae; Camelineae; Arabidopsis	U496K_ARATH^U496K_ARATH^Q:149-1234,H:14-386^42.246%ID^E:6.72e-73^RecName: Full=UPF0496 protein At1g20180;^Eukaryota; Viridiplantae; Streptophyta; Embryophyta; Tracheophyta; Spermatophyta; Magnoliopsida; eudicotyledons; Gunneridae; Pentapetalae; rosids; malvids; Brassicales; Brassicaceae; Camelineae; Arabidopsis	0	12	4	55	64	90	120	228	543	105	111	80
Pl01G0000004700.v1	Pl01	344398	346112	Pl01G0000004700.1.v1	1-1095[+]	KEGG:ath:AT1G75900	GO:0005576^cellular_component^extracellular region`GO:0016298^molecular_function^lipase activity`GO:0016042^biological_process^lipid catabolic process	PF00657.23^Lipase_GDSL^GDSL-like Lipase/Acylhydrolase^33-338^E:4.7e-32	GO:0016788^molecular_function^hydrolase activity, acting on ester bonds	EXL3_ARATH^EXL3_ARATH^Q:7-1029,H:24-357^46.243%ID^E:3.5e-101^RecName: Full=GDSL esterase/lipase EXL3;^Eukaryota; Viridiplantae; Streptophyta; Embryophyta; Tracheophyta; Spermatophyta; Magnoliopsida; eudicotyledons; Gunneridae; Pentapetalae; rosids; malvids; Brassicales; Brassicaceae; Camelineae; Arabidopsis	EXL3_ARATH^EXL3_ARATH^Q:7-1029,H:24-357^46.243%ID^E:3.5e-101^RecName: Full=GDSL esterase/lipase EXL3;^Eukaryota; Viridiplantae; Streptophyta; Embryophyta; Tracheophyta; Spermatophyta; Magnoliopsida; eudicotyledons; Gunneridae; Pentapetalae; rosids; malvids; Brassicales; Brassicaceae; Camelineae; Arabidopsis	46	76	59	13	4	25	52	95	164	2	0	0
Pl01G0000005300.v1	Pl01	373853	376548	Pl01G0000005300.1.v1	28-1119[+]	KEGG:ath:AT1G75880	GO:0005576^cellular_component^extracellular region`GO:0016298^molecular_function^lipase activity`GO:0016042^biological_process^lipid catabolic process	PF00657.23^Lipase_GDSL^GDSL-like Lipase/Acylhydrolase^51-359^E:2.6e-31	GO:0016788^molecular_function^hydrolase activity, acting on ester bonds	EXL1_ARATH^EXL1_ARATH^Q:133-1143,H:38-375^54.572%ID^E:2.48e-129^RecName: Full=GDSL esterase/lipase EXL1;^Eukaryota; Viridiplantae; Streptophyta; Embryophyta; Tracheophyta; Spermatophyta; Magnoliopsida; eudicotyledons; Gunneridae; Pentapetalae; rosids; malvids; Brassicales; Brassicaceae; Camelineae; Arabidopsis	EXL1_ARATH^EXL1_ARATH^Q:133-1143,H:38-375^54.572%ID^E:2.48e-129^RecName: Full=GDSL esterase/lipase EXL1;^Eukaryota; Viridiplantae; Streptophyta; Embryophyta; Tracheophyta; Spermatophyta; Magnoliopsida; eudicotyledons; Gunneridae; Pentapetalae; rosids; malvids; Brassicales; Brassicaceae; Camelineae; Arabidopsis	388	292	322	1184	1760	1545	18	37	104	201	158	145
Pl01G0000005400.v1	Pl01	383432	388389	Pl01G0000005400.1.v1	111-1119[+]	KEGG:ath:AT1G75900	GO:0005576^cellular_component^extracellular region`GO:0016298^molecular_function^lipase activity`GO:0016042^biological_process^lipid catabolic process	PF00657.23^Lipase_GDSL^GDSL-like Lipase/Acylhydrolase^54-359^E:1.1e-31	GO:0016788^molecular_function^hydrolase activity, acting on ester bonds	EXL3_ARATH^EXL3_ARATH^Q:195-1223,H:20-363^54.046%ID^E:4.54e-122^RecName: Full=GDSL esterase/lipase EXL3;^Eukaryota; Viridiplantae; Streptophyta; Embryophyta; Tracheophyta; Spermatophyta; Magnoliopsida; eudicotyledons; Gunneridae; Pentapetalae; rosids; malvids; Brassicales; Brassicaceae; Camelineae; Arabidopsis	EXL3_ARATH^EXL3_ARATH^Q:195-1223,H:20-363^54.046%ID^E:4.54e-122^RecName: Full=GDSL esterase/lipase EXL3;^Eukaryota; Viridiplantae; Streptophyta; Embryophyta; Tracheophyta; Spermatophyta; Magnoliopsida; eudicotyledons; Gunneridae; Pentapetalae; rosids; malvids; Brassicales; Brassicaceae; Camelineae; Arabidopsis	86	42	77	291	399	315	0	10	7	0	0	0
Pl01G0000005800.v1	Pl01	410340	415479	Pl01G0000005800.1.v1;Pl01G0000005800.2.v1	418-720[+];41-1773[+]	.;.	GO:0005634^cellular_component^nucleus`GO:0003746^molecular_function^translation elongation factor activity`GO:0007275^biological_process^multicellular organism development`GO:0045927^biological_process^positive regulation of growth;GO:0005634^cellular_component^nucleus`GO:0003746^molecular_function^translation elongation factor activity`GO:0007275^biological_process^multicellular organism develop…	PF11961.9^DUF3475^Domain of unknown function (DUF3475)^117-173^E:2e-22;PF11961.9^DUF3475^Domain of unknown function (DUF3475)^117-173^E:7.8e-22`PF05003.13^DUF668^Protein of unknown function (DUF668)^335-420^E:8.8e-28	.;.	PSI2_ARATH^PSI2_ARATH^Q:529-1122,H:48-254^50.239%ID^E:5.91e-50^RecName: Full=Protein PSK SIMULATOR 2 {ECO:0000303|PubMed:25062973};^Eukaryota; Viridiplantae; Streptophyta; Embryophyta; Tracheophyta; Spermatophyta; Magnoliopsida; eudicotyledons; Gunneridae; Pentapetalae; rosids; malvids; Brassicales; Brassicaceae; Camelineae; Arabidopsis;PSI2_ARATH^PSI2_ARATH^Q:152-1825,H:48-615^48.696%ID^E:7.26e-…	PSI2_ARATH^PSI2_ARATH^Q:529-1122,H:48-254^50.239%ID^E:5.91e-50^RecName: Full=Protein PSK SIMULATOR 2 {ECO:0000303|PubMed:25062973};^Eukaryota; Viridiplantae; Streptophyta; Embryophyta; Tracheophyta; Spermatophyta; Magnoliopsida; eudicotyledons; Gunneridae; Pentapetalae; rosids; malvids; Brassicales; Brassicaceae; Camelineae; Arabidopsis;PSI2_ARATH^PSI2_ARATH^Q:152-1825,H:48-615^48.696%ID^E:7.26e-…	25	34	16	179	263	215	139	247	625	223	151	237
Pl01G0000006000.v1	Pl01	428374	430772	Pl01G0000006000.1.v1	86-930[+]	KEGG:ath:AT4G24180	GO:0005576^cellular_component^extracellular region`GO:0006952^biological_process^defense response`GO:0009617^biological_process^response to bacterium`GO:0009723^biological_process^response to ethylene	PF00314.18^Thaumatin^Thaumatin family^28-240^E:5.7e-83	.	THLP1_ARATH^THLP1_ARATH^Q:2-808,H:2-257^62.044%ID^E:1.53e-99^RecName: Full=Thaumatin-like protein 1 {ECO:0000303|PubMed:15988566};^Eukaryota; Viridiplantae; Streptophyta; Embryophyta; Tracheophyta; Spermatophyta; Magnoliopsida; eudicotyledons; Gunneridae; Pentapetalae; rosids; malvids; Brassicales; Brassicaceae; Camelineae; Arabidopsis	THLP1_ARATH^THLP1_ARATH^Q:2-808,H:2-257^62.044%ID^E:1.53e-99^RecName: Full=Thaumatin-like protein 1 {ECO:0000303|PubMed:15988566};^Eukaryota; Viridiplantae; Streptophyta; Embryophyta; Tracheophyta; Spermatophyta; Magnoliopsida; eudicotyledons; Gunneridae; Pentapetalae; rosids; malvids; Brassicales; Brassicaceae; Camelineae; Arabidopsis	70	48	58	163	221	152	24	46	97	230	191	164
Pl01G0000007600.v1	Pl01	512778	513719	Pl01G0000007600.1.v1;Pl01G0000007600.2.v1	139-300[+];25-144[+]	KEGG:sot:102582131;KEGG:sot:102582131	GO:0005576^cellular_component^extracellular region`GO:0009505^cellular_component^plant-type cell wall`GO:0006952^biological_process^defense response`GO:0009737^biological_process^response to abscisic acid`GO:0009741^biological_process^response to brassinosteroid`GO:0009739^biological_process^response to gibberellin;GO:0005576^cellular_component^extracellular region`GO:0009505^cellular_component^p…	PF02704.15^GASA^Gibberellin regulated protein^40-99^E:1.9e-21;.	.;.	SNAK2_SOLTU^SNAK2_SOLTU^Q:244-435,H:41-104^84.375%ID^E:1.54e-31^RecName: Full=Snakin-2;^Eukaryota; Viridiplantae; Streptophyta; Embryophyta; Tracheophyta; Spermatophyta; Magnoliopsida; eudicotyledons; Gunneridae; Pentapetalae; asterids; lamiids; Solanales; Solanaceae; Solanoideae; Solaneae; Solanum;SNAK2_SOLTU^SNAK2_SOLTU^Q:18-197,H:45-104^88.333%ID^E:4.22e-31^RecName: Full=Snakin-2;^Eukaryota; V…	SNAK2_SOLTU^SNAK2_SOLTU^Q:244-435,H:41-104^84.375%ID^E:1.54e-31^RecName: Full=Snakin-2;^Eukaryota; Viridiplantae; Streptophyta; Embryophyta; Tracheophyta; Spermatophyta; Magnoliopsida; eudicotyledons; Gunneridae; Pentapetalae; asterids; lamiids; Solanales; Solanaceae; Solanoideae; Solaneae; Solanum;SNAK2_SOLTU^SNAK2_SOLTU^Q:18-197,H:45-104^88.333%ID^E:4.22e-31^RecName: Full=Snakin-2;^Eukaryota; V…	323	315	408	3612	5786	4754	1563	2492	5690	27109	10529	10596
Pl01G0000007700.v1	Pl01	516481	517012	Pl01G0000007700.1.v1	1-300[+]	KEGG:sot:102582131	GO:0005576^cellular_component^extracellular region`GO:0009505^cellular_component^plant-type cell wall`GO:0006952^biological_process^defense response`GO:0009737^biological_process^response to abscisic acid`GO:0009741^biological_process^response to brassinosteroid`GO:0009739^biological_process^response to gibberellin	PF02704.15^GASA^Gibberellin regulated protein^40-99^E:1.4e-21	.	SNAK2_SOLTU^SNAK2_SOLTU^Q:106-297,H:41-104^73.438%ID^E:1.84e-27^RecName: Full=Snakin-2;^Eukaryota; Viridiplantae; Streptophyta; Embryophyta; Tracheophyta; Spermatophyta; Magnoliopsida; eudicotyledons; Gunneridae; Pentapetalae; asterids; lamiids; Solanales; Solanaceae; Solanoideae; Solaneae; Solanum	SNAK2_SOLTU^SNAK2_SOLTU^Q:106-297,H:41-104^73.438%ID^E:1.84e-27^RecName: Full=Snakin-2;^Eukaryota; Viridiplantae; Streptophyta; Embryophyta; Tracheophyta; Spermatophyta; Magnoliopsida; eudicotyledons; Gunneridae; Pentapetalae; asterids; lamiids; Solanales; Solanaceae; Solanoideae; Solaneae; Solanum	31	29	83	38	77	40	149	215	467	18	20	8
Pl01G0000008100.v1	Pl01	535278	538989	Pl01G0000008100.1.v1;Pl01G0000008100.2.v1;Pl01G0000008100.3.v1	88-1494[+];205-657[+];68-579[+]	KEGG:nta:107790581`KO:K00844;KEGG:nta:107790581`KO:K00844;KEGG:nta:107790581`KO:K00844	GO:0009570^cellular_component^chloroplast stroma`GO:0005829^cellular_component^cytosol`GO:0005739^cellular_component^mitochondrion`GO:0005524^molecular_function^ATP binding`GO:0008865^molecular_function^fructokinase activity`GO:0004340^molecular_function^glucokinase activity`GO:0005536^molecular_function^glucose binding`GO:0019158^molecular_function^mannokinase activity`GO:0001678^biological_proc…	PF00349.22^Hexokinase_1^Hexokinase^43-241^E:6.4e-62`PF03727.17^Hexokinase_2^Hexokinase^248-488^E:7.1e-76;PF03727.17^Hexokinase_2^Hexokinase^1-209^E:2.3e-62;PF03727.17^Hexokinase_2^Hexokinase^6-183^E:7.9e-49	GO:0005524^molecular_function^ATP binding`GO:0016773^molecular_function^phosphotransferase activity, alcohol group as acceptor`GO:0005975^biological_process^carbohydrate metabolic process;GO:0005524^molecular_function^ATP binding`GO:0016773^molecular_function^phosphotransferase activity, alcohol group as acceptor`GO:0005975^biological_process^carbohydrate metabolic process;GO:0005524^molecular_fu…	HXK2_TOBAC^HXK2_TOBAC^Q:136-1575,H:14-498^70.021%ID^E:0^RecName: Full=Hexokinase-2, chloroplastic;^Eukaryota; Viridiplantae; Streptophyta; Embryophyta; Tracheophyta; Spermatophyta; Magnoliopsida; eudicotyledons; Gunneridae; Pentapetalae; asterids; lamiids; Solanales; Solanaceae; Nicotianoideae; Nicotianeae; Nicotiana;HXK2_TOBAC^HXK2_TOBAC^Q:52-855,H:232-498^71.747%ID^E:2.69e-130^RecName: Full=Hex…	HXK2_TOBAC^HXK2_TOBAC^Q:136-1575,H:14-498^70.021%ID^E:0^RecName: Full=Hexokinase-2, chloroplastic;^Eukaryota; Viridiplantae; Streptophyta; Embryophyta; Tracheophyta; Spermatophyta; Magnoliopsida; eudicotyledons; Gunneridae; Pentapetalae; asterids; lamiids; Solanales; Solanaceae; Nicotianoideae; Nicotianeae; Nicotiana;HXK2_TOBAC^HXK2_TOBAC^Q:52-855,H:232-498^71.747%ID^E:2.69e-130^RecName: Full=Hex…	773	625	659	414	691	413	540	850	1633	203	153	86
Pl01G0000009700.v1	Pl01	696827	697405	Pl01G0000009700.1.v1	31-345[+]	.	.	.	.	.	.	0	0	0	12	18	4	45	60	144	63	43	23
Pl01G0000009800.v1	Pl01	700041	700608	Pl01G0000009800.1.v1	44-342[+]	.	.	.	.	.	.	0	0	0	33	81	25	28	39	157	106	57	27
Pl01G0000009900.v1	Pl01	702696	703135	Pl01G0000009900.1.v1	1-330[+]	.	.	.	.	.	.	0	0	0	14	115	36	38	92	96	134	96	40
Pl01G0000010800.v1	Pl01	770020	771183	Pl01G0000010800.1.v1	29-603[+]	.	.	.	.	.	.	154	137	174	45	42	59	95	129	297	21	7	1
Pl01G0000011500.v1	Pl01	841665	842477	Pl01G0000011500.1.v1	1-813[+]	KEGG:ath:AT1G75490	GO:0005634^cellular_component^nucleus`GO:0003700^molecular_function^DNA-binding transcription factor activity`GO:0043565^molecular_function^sequence-specific DNA binding`GO:0000976^molecular_function^transcription regulatory region sequence-specific DNA binding`GO:0045893^biological_process^positive regulation of transcription, DNA-templated`GO:0010200^biological_process^response to chitin	PF00847.21^AP2^AP2 domain^39-88^E:3.9e-13	GO:0003700^molecular_function^DNA-binding transcription factor activity`GO:0006355^biological_process^regulation of transcription, DNA-templated	DRE2D_ARATH^DRE2D_ARATH^Q:22-291,H:10-99^77.778%ID^E:3.81e-45^RecName: Full=Dehydration-responsive element-binding protein 2D;^Eukaryota; Viridiplantae; Streptophyta; Embryophyta; Tracheophyta; Spermatophyta; Magnoliopsida; eudicotyledons; Gunneridae; Pentapetalae; rosids; malvids; Brassicales; Brassicaceae; Camelineae; Arabidopsis	DRE2D_ARATH^DRE2D_ARATH^Q:22-291,H:10-99^77.778%ID^E:3.81e-45^RecName: Full=Dehydration-responsive element-binding protein 2D;^Eukaryota; Viridiplantae; Streptophyta; Embryophyta; Tracheophyta; Spermatophyta; Magnoliopsida; eudicotyledons; Gunneridae; Pentapetalae; rosids; malvids; Brassicales; Brassicaceae; Camelineae; Arabidopsis	0	2	0	34	46	48	215	221	559	394	184	100
Pl01G0000012300.v1	Pl01	918660	920656	Pl01G0000012300.1.v1	10-666[+]	KEGG:bta:520468	GO:0016021^cellular_component^integral component of membrane	PF03798.17^TRAM_LAG1_CLN8^TLC domain^33-211^E:2.4e-22	GO:0016021^cellular_component^integral component of membrane	TLCD5_BOVIN^TLCD5_BOVIN^Q:52-669,H:15-222^31.25%ID^E:7.09e-21^RecName: Full=TLC domain-containing protein 5 {ECO:0000305};^Eukaryota; Metazoa; Chordata; Craniata; Vertebrata; Euteleostomi; Mammalia; Eutheria; Laurasiatheria; Artiodactyla; Ruminantia; Pecora; Bovidae; Bovinae; Bos	TLCD5_BOVIN^TLCD5_BOVIN^Q:52-669,H:15-222^31.25%ID^E:7.09e-21^RecName: Full=TLC domain-containing protein 5 {ECO:0000305};^Eukaryota; Metazoa; Chordata; Craniata; Vertebrata; Euteleostomi; Mammalia; Eutheria; Laurasiatheria; Artiodactyla; Ruminantia; Pecora; Bovidae; Bovinae; Bos	54	32	32	217	306	342	14	45	81	177	126	110
Pl01G0000013000.v1	Pl01	974188	976654	Pl01G0000013000.1.v1	1-1149[+]	KEGG:ath:AT1G19640`KO:K08241	GO:0005737^cellular_component^cytoplasm`GO:0005634^cellular_component^nucleus`GO:0030795^molecular_function^jasmonate O-methyltransferase activity`GO:0102078^molecular_function^methyl jasmonate methylesterase activity`GO:0008757^molecular_function^S-adenosylmethionine-dependent methyltransferase activity`GO:0009694^biological_process^jasmonic acid metabolic process`GO:0032259^biological_process^m…	PF03492.16^Methyltransf_7^SAM dependent carboxyl methyltransferase^49-379^E:3.5e-124	GO:0008168^molecular_function^methyltransferase activity	JMT_ARATH^JMT_ARATH^Q:25-1137,H:1-387^50.386%ID^E:3.94e-111^RecName: Full=Jasmonate O-methyltransferase;^Eukaryota; Viridiplantae; Streptophyta; Embryophyta; Tracheophyta; Spermatophyta; Magnoliopsida; eudicotyledons; Gunneridae; Pentapetalae; rosids; malvids; Brassicales; Brassicaceae; Camelineae; Arabidopsis	JMT_ARATH^JMT_ARATH^Q:25-1137,H:1-387^50.386%ID^E:3.94e-111^RecName: Full=Jasmonate O-methyltransferase;^Eukaryota; Viridiplantae; Streptophyta; Embryophyta; Tracheophyta; Spermatophyta; Magnoliopsida; eudicotyledons; Gunneridae; Pentapetalae; rosids; malvids; Brassicales; Brassicaceae; Camelineae; Arabidopsis	2357	1942	2083	492	710	588	2437	3616	8013	678	614	435
Pl01G0000013500.v1	Pl01	1004721	1008203	Pl01G0000013500.1.v1	146-1020[+]	.	GO:0045552^molecular_function^dihydrokaempferol 4-reductase activity`GO:0047890^molecular_function^flavanone 4-reductase activity`GO:0009813^biological_process^flavonoid biosynthetic process	PF01370.22^Epimerase^NAD dependent epimerase/dehydratase family^8-248^E:9.4e-26`PF05368.14^NmrA^NmrA-like family^8-140^E:4.9e-11`PF00106.26^adh_short^short chain dehydrogenase^8-78^E:9.5e-06`PF08659.11^KR^KR domain^9-132^E:1.6e-05`PF01073.20^3Beta_HSD^3-beta hydroxysteroid dehydrogenase/isomerase family^10-172^E:3.2e-17`PF16363.6^GDP_Man_Dehyd^GDP-mannose 4,6 dehydratase^10-270^E:1.8e-13`PF07993.…	GO:0003824^molecular_function^catalytic activity`GO:0050662^molecular_function^obsolete coenzyme binding`GO:0003854^molecular_function^3-beta-hydroxy-delta5-steroid dehydrogenase activity`GO:0016616^molecular_function^oxidoreductase activity, acting on the CH-OH group of donors, NAD or NADP as acceptor`GO:0006694^biological_process^steroid biosynthetic process`GO:0055114^biological_process^oxidat…	DFRA_PYRCO^DFRA_PYRCO^Q:146-1135,H:1-330^75.455%ID^E:0^RecName: Full=Bifunctional dihydroflavonol 4-reductase/flavanone 4-reductase;^Eukaryota; Viridiplantae; Streptophyta; Embryophyta; Tracheophyta; Spermatophyta; Magnoliopsida; eudicotyledons; Gunneridae; Pentapetalae; rosids; fabids; Rosales; Rosaceae; Amygdaloideae; Maleae; Pyrus	DFRA_PYRCO^DFRA_PYRCO^Q:146-1135,H:1-330^75.455%ID^E:0^RecName: Full=Bifunctional dihydroflavonol 4-reductase/flavanone 4-reductase;^Eukaryota; Viridiplantae; Streptophyta; Embryophyta; Tracheophyta; Spermatophyta; Magnoliopsida; eudicotyledons; Gunneridae; Pentapetalae; rosids; fabids; Rosales; Rosaceae; Amygdaloideae; Maleae; Pyrus	18618	18306	17350	8847	12510	10393	9594	14948	32524	3915	2502	2095
Pl01G0000013900.v1	Pl01	1035058	1036906	Pl01G0000013900.1.v1;Pl01G0000013900.2.v1;Pl01G0000013900.3.v1	156-441[+];131-426[+];34-177[+]	.;.;.	.;.;.	.;.;.	.;.;.	.;.;.	.;.;.	5302	4074	4419	16762	22039	19189	2879	3978	9160	35162	26485	25618
Pl01G0000014000.v1	Pl01	1041686	1043168	Pl01G0000014000.1.v1;Pl01G0000014000.2.v1	94-798[+];20-408[+]	KEGG:ath:AT2G02360;KEGG:ath:AT2G02360	GO:0030246^molecular_function^carbohydrate binding`GO:0016567^biological_process^protein ubiquitination;GO:0030246^molecular_function^carbohydrate binding`GO:0016567^biological_process^protein ubiquitination	PF00646.34^F-box^F-box domain^6-46^E:8.7e-05`PF14299.7^PP2^Phloem protein 2^94-256^E:2.3e-48;PF00646.34^F-box^F-box domain^5-46^E:2.7e-05`PF14299.7^PP2^Phloem protein 2^94-129^E:4.2e-11	GO:0005515^molecular_function^protein binding;GO:0005515^molecular_function^protein binding	P2B10_ARATH^P2B10_ARATH^Q:91-873,H:11-272^42.424%ID^E:8.03e-68^RecName: Full=F-box protein PP2-B10;^Eukaryota; Viridiplantae; Streptophyta; Embryophyta; Tracheophyta; Spermatophyta; Magnoliopsida; eudicotyledons; Gunneridae; Pentapetalae; rosids; malvids; Brassicales; Brassicaceae; Camelineae; Arabidopsis;P2B10_ARATH^P2B10_ARATH^Q:17-406,H:11-139^47.692%ID^E:7.25e-46^RecName: Full=F-box protein P…	P2B10_ARATH^P2B10_ARATH^Q:91-873,H:11-272^42.424%ID^E:8.03e-68^RecName: Full=F-box protein PP2-B10;^Eukaryota; Viridiplantae; Streptophyta; Embryophyta; Tracheophyta; Spermatophyta; Magnoliopsida; eudicotyledons; Gunneridae; Pentapetalae; rosids; malvids; Brassicales; Brassicaceae; Camelineae; Arabidopsis;P2B10_ARATH^P2B10_ARATH^Q:17-406,H:11-139^47.692%ID^E:7.25e-46^RecName: Full=F-box protein P…	38	60	65	1271	1771	1484	676	1126	2459	1358	942	1047
Pl01G0000014100.v1	Pl01	1047834	1050202	Pl01G0000014100.1.v1;Pl01G0000014100.2.v1	242-783[+];200-384[+]	KEGG:ath:AT2G02360;KEGG:ath:AT2G02360	GO:0030246^molecular_function^carbohydrate binding`GO:0016567^biological_process^protein ubiquitination;GO:0030246^molecular_function^carbohydrate binding`GO:0016567^biological_process^protein ubiquitination	PF00646.34^F-box^F-box domain^9-44^E:0.00013`PF14299.7^PP2^Phloem protein 2^94-256^E:7.1e-50;PF00646.34^F-box^F-box domain^8-45^E:3.5e-05`PF14299.7^PP2^Phloem protein 2^94-125^E:2e-09	GO:0005515^molecular_function^protein binding;GO:0005515^molecular_function^protein binding	P2B10_ARATH^P2B10_ARATH^Q:239-1021,H:11-272^42.803%ID^E:1.26e-65^RecName: Full=F-box protein PP2-B10;^Eukaryota; Viridiplantae; Streptophyta; Embryophyta; Tracheophyta; Spermatophyta; Magnoliopsida; eudicotyledons; Gunneridae; Pentapetalae; rosids; malvids; Brassicales; Brassicaceae; Camelineae; Arabidopsis;P2B10_ARATH^P2B10_ARATH^Q:197-574,H:11-135^46.825%ID^E:8.74e-28^RecName: Full=F-box protei…	P2B10_ARATH^P2B10_ARATH^Q:239-1021,H:11-272^42.803%ID^E:1.26e-65^RecName: Full=F-box protein PP2-B10;^Eukaryota; Viridiplantae; Streptophyta; Embryophyta; Tracheophyta; Spermatophyta; Magnoliopsida; eudicotyledons; Gunneridae; Pentapetalae; rosids; malvids; Brassicales; Brassicaceae; Camelineae; Arabidopsis;P2B10_ARATH^P2B10_ARATH^Q:197-574,H:11-135^46.825%ID^E:8.74e-28^RecName: Full=F-box protei…	116	106	138	514	732	661	35	80	109	582	516	444
Pl01G0000018300.v1	Pl01	1333349	1334952	Pl01G0000018300.1.v1	1-744[+]	.	GO:0006952^biological_process^defense response`GO:0009737^biological_process^response to abscisic acid`GO:0009607^biological_process^response to biotic stimulus	PF00314.18^Thaumatin^Thaumatin family^33-247^E:1.7e-81	.	CRJ35_CRYJA^CRJ35_CRYJA^Q:70-741,H:20-238^66.222%ID^E:1.96e-101^RecName: Full=Pathogenesis-related thaumatin-like protein 3.5 {ECO:0000305};^Eukaryota; Viridiplantae; Streptophyta; Embryophyta; Tracheophyta; Spermatophyta; Pinopsida; Pinidae; Cupressales; Cupressaceae; Cryptomeria	CRJ35_CRYJA^CRJ35_CRYJA^Q:70-741,H:20-238^66.222%ID^E:1.96e-101^RecName: Full=Pathogenesis-related thaumatin-like protein 3.5 {ECO:0000305};^Eukaryota; Viridiplantae; Streptophyta; Embryophyta; Tracheophyta; Spermatophyta; Pinopsida; Pinidae; Cupressales; Cupressaceae; Cryptomeria	88	46	44	8	10	8	10	12	52	5	4	0
Pl01G0000018500.v1	Pl01	1341609	1343387	Pl01G0000018500.1.v1	1-1152[+]	KEGG:ath:AT1G75020`KO:K13513	GO:0012505^cellular_component^endomembrane system`GO:0005783^cellular_component^endoplasmic reticulum`GO:0016021^cellular_component^integral component of membrane`GO:0003841^molecular_function^1-acylglycerol-3-phosphate O-acyltransferase activity`GO:0016746^molecular_function^transferase activity, transferring acyl groups`GO:0016024^biological_process^CDP-diacylglycerol biosynthetic process`GO:00…	PF01553.22^Acyltransferase^Acyltransferase^89-243^E:1.2e-19`PF16076.6^Acyltransf_C^Acyltransferase C-terminus^254-323^E:1.2e-15	GO:0016746^molecular_function^transferase activity, transferring acyl groups	LPAT4_ARATH^LPAT4_ARATH^Q:1-1098,H:1-365^62.568%ID^E:3.61e-167^RecName: Full=Probable 1-acyl-sn-glycerol-3-phosphate acyltransferase 4;^Eukaryota; Viridiplantae; Streptophyta; Embryophyta; Tracheophyta; Spermatophyta; Magnoliopsida; eudicotyledons; Gunneridae; Pentapetalae; rosids; malvids; Brassicales; Brassicaceae; Camelineae; Arabidopsis	LPAT4_ARATH^LPAT4_ARATH^Q:1-1098,H:1-365^62.568%ID^E:3.61e-167^RecName: Full=Probable 1-acyl-sn-glycerol-3-phosphate acyltransferase 4;^Eukaryota; Viridiplantae; Streptophyta; Embryophyta; Tracheophyta; Spermatophyta; Magnoliopsida; eudicotyledons; Gunneridae; Pentapetalae; rosids; malvids; Brassicales; Brassicaceae; Camelineae; Arabidopsis	126	105	129	362	708	666	438	726	1639	897	704	607
Pl01G0000019100.v1	Pl01	1392114	1396312	Pl01G0000019100.1.v1	1-1380[+]	KEGG:ath:AT1G47530`KO:K03327	GO:0016021^cellular_component^integral component of membrane`GO:0016020^cellular_component^membrane`GO:0005634^cellular_component^nucleus`GO:0005774^cellular_component^vacuolar membrane`GO:0015297^molecular_function^antiporter activity`GO:0022857^molecular_function^transmembrane transporter activity`GO:0042910^molecular_function^xenobiotic transmembrane transporter activity	PF01554.19^MatE^MatE^42-191^E:1.2e-30`PF01554.19^MatE^MatE^239-399^E:1.5e-25	GO:0015297^molecular_function^antiporter activity`GO:0006855^biological_process^drug transmembrane transport`GO:0055085^biological_process^transmembrane transport`GO:0016020^cellular_component^membrane	DTX33_ARATH^DTX33_ARATH^Q:16-1362,H:8-481^70.042%ID^E:0^RecName: Full=Protein DETOXIFICATION 33 {ECO:0000303|PubMed:11739388};^Eukaryota; Viridiplantae; Streptophyta; Embryophyta; Tracheophyta; Spermatophyta; Magnoliopsida; eudicotyledons; Gunneridae; Pentapetalae; rosids; malvids; Brassicales; Brassicaceae; Camelineae; Arabidopsis	DTX33_ARATH^DTX33_ARATH^Q:16-1362,H:8-481^70.042%ID^E:0^RecName: Full=Protein DETOXIFICATION 33 {ECO:0000303|PubMed:11739388};^Eukaryota; Viridiplantae; Streptophyta; Embryophyta; Tracheophyta; Spermatophyta; Magnoliopsida; eudicotyledons; Gunneridae; Pentapetalae; rosids; malvids; Brassicales; Brassicaceae; Camelineae; Arabidopsis	600	595	501	671	1141	900	56	165	248	153	131	164
Pl01G0000019700.v1	Pl01	1461513	1471616	Pl01G0000019700.1.v1	156-2187[+]	KEGG:smo:SELMODRAFT_444075	GO:0005524^molecular_function^ATP binding`GO:0004672^molecular_function^protein kinase activity	PF00069.26^Pkinase^Protein kinase domain^409-681^E:1.6e-40`PF07714.18^PK_Tyr_Ser-Thr^Protein tyrosine and serine/threonine kinase^412-681^E:3.8e-41	GO:0004672^molecular_function^protein kinase activity`GO:0005524^molecular_function^ATP binding`GO:0006468^biological_process^protein phosphorylation	Y4407_SELML^Y4407_SELML^Q:1125-2213,H:165-479^41.799%ID^E:6.02e-80^RecName: Full=Inactive protein kinase SELMODRAFT_444075;^Eukaryota; Viridiplantae; Streptophyta; Embryophyta; Tracheophyta; Lycopodiopsida; Selaginellales; Selaginellaceae; Selaginella`Y4407_SELML^Y4407_SELML^Q:465-689,H:8-82^37.333%ID^E:3.64e-07^RecName: Full=Inactive protein kinase SELMODRAFT_444075;^Eukaryota; Viridiplantae; St…	Y4407_SELML^Y4407_SELML^Q:1125-2213,H:165-479^41.799%ID^E:6.02e-80^RecName: Full=Inactive protein kinase SELMODRAFT_444075;^Eukaryota; Viridiplantae; Streptophyta; Embryophyta; Tracheophyta; Lycopodiopsida; Selaginellales; Selaginellaceae; Selaginella`Y4407_SELML^Y4407_SELML^Q:465-689,H:8-82^37.333%ID^E:3.64e-07^RecName: Full=Inactive protein kinase SELMODRAFT_444075;^Eukaryota; Viridiplantae; St…	439	344	347	632	985	934	119	185	438	177	84	107
Pl01G0000019800.v1	Pl01	1481367	1484595	Pl01G0000019800.1.v1	1-1068[+]	KEGG:ath:AT5G42630	GO:0005618^cellular_component^cell wall`GO:0005634^cellular_component^nucleus`GO:0003700^molecular_function^DNA-binding transcription factor activity`GO:0000976^molecular_function^transcription regulatory region sequence-specific DNA binding`GO:0030154^biological_process^cell differentiation`GO:0080060^biological_process^integument development`GO:0048481^biological_process^plant ovule development…	PF00249.32^Myb_DNA-binding^Myb-like DNA-binding domain^134-185^E:1.6e-05	.	KAN4_ARATH^KAN4_ARATH^Q:301-603,H:69-174^77.358%ID^E:1.15e-50^RecName: Full=Probable transcription factor KAN4;^Eukaryota; Viridiplantae; Streptophyta; Embryophyta; Tracheophyta; Spermatophyta; Magnoliopsida; eudicotyledons; Gunneridae; Pentapetalae; rosids; malvids; Brassicales; Brassicaceae; Camelineae; Arabidopsis	KAN4_ARATH^KAN4_ARATH^Q:301-603,H:69-174^77.358%ID^E:1.15e-50^RecName: Full=Probable transcription factor KAN4;^Eukaryota; Viridiplantae; Streptophyta; Embryophyta; Tracheophyta; Spermatophyta; Magnoliopsida; eudicotyledons; Gunneridae; Pentapetalae; rosids; malvids; Brassicales; Brassicaceae; Camelineae; Arabidopsis	9	0	20	0	8	4	6	4	8	74	73	52
Pl01G0000019900.v1	Pl01	1497314	1500523	Pl01G0000019900.1.v1	112-1323[+]	KEGG:ath:AT4G33280	GO:0005634^cellular_component^nucleus`GO:0005773^cellular_component^vacuole`GO:0003677^molecular_function^DNA binding	PF02362.22^B3^B3 DNA binding domain^36-112^E:2.2e-16`PF02362.22^B3^B3 DNA binding domain^316-404^E:4.3e-12	GO:0003677^molecular_function^DNA binding	REM16_ARATH^REM16_ARATH^Q:121-1341,H:3-319^28.676%ID^E:9.42e-44^RecName: Full=B3 domain-containing protein REM16;^Eukaryota; Viridiplantae; Streptophyta; Embryophyta; Tracheophyta; Spermatophyta; Magnoliopsida; eudicotyledons; Gunneridae; Pentapetalae; rosids; malvids; Brassicales; Brassicaceae; Camelineae; Arabidopsis	REM16_ARATH^REM16_ARATH^Q:121-1341,H:3-319^28.676%ID^E:9.42e-44^RecName: Full=B3 domain-containing protein REM16;^Eukaryota; Viridiplantae; Streptophyta; Embryophyta; Tracheophyta; Spermatophyta; Magnoliopsida; eudicotyledons; Gunneridae; Pentapetalae; rosids; malvids; Brassicales; Brassicaceae; Camelineae; Arabidopsis	0	0	0	77	70	106	33	17	40	356	185	160
Pl01G0000020400.v1	Pl01	1541674	1545338	Pl01G0000020400.1.v1	237-2457[+]	KEGG:ath:AT4G33300	GO:0048046^cellular_component^apoplast`GO:0043531^molecular_function^ADP binding`GO:0005524^molecular_function^ATP binding`GO:0042742^biological_process^defense response to bacterium	PF05659.12^RPW8^Arabidopsis broad-spectrum mildew resistance protein RPW8^9-135^E:1.5e-10`PF00931.23^NB-ARC^NB-ARC domain^197-404^E:3.2e-27	GO:0043531^molecular_function^ADP binding	DRL29_ARATH^DRL29_ARATH^Q:237-2690,H:1-816^53.446%ID^E:0^RecName: Full=Probable disease resistance protein At4g33300;^Eukaryota; Viridiplantae; Streptophyta; Embryophyta; Tracheophyta; Spermatophyta; Magnoliopsida; eudicotyledons; Gunneridae; Pentapetalae; rosids; malvids; Brassicales; Brassicaceae; Camelineae; Arabidopsis	DRL29_ARATH^DRL29_ARATH^Q:237-2690,H:1-816^53.446%ID^E:0^RecName: Full=Probable disease resistance protein At4g33300;^Eukaryota; Viridiplantae; Streptophyta; Embryophyta; Tracheophyta; Spermatophyta; Magnoliopsida; eudicotyledons; Gunneridae; Pentapetalae; rosids; malvids; Brassicales; Brassicaceae; Camelineae; Arabidopsis	163	130	105	562	850	801	359	635	1532	1441	987	997
Pl01G0000020700.v1	Pl01	1564328	1565066	Pl01G0000020700.1.v1	1-540[+]	KEGG:ath:AT4G37260`KO:K09422	GO:0005634^cellular_component^nucleus`GO:0003700^molecular_function^DNA-binding transcription factor activity`GO:0043565^molecular_function^sequence-specific DNA binding`GO:0003712^molecular_function^transcription coregulator activity`GO:0000976^molecular_function^transcription regulatory region sequence-specific DNA binding`GO:0019760^biological_process^glucosinolate metabolic process`GO:1901001…	PF00249.32^Myb_DNA-binding^Myb-like DNA-binding domain^12-55^E:1.5e-11`PF13921.7^Myb_DNA-bind_6^Myb-like DNA-binding domain^13-69^E:1.8e-11`PF00249.32^Myb_DNA-binding^Myb-like DNA-binding domain^64-104^E:6.2e-08	.	MYB73_ARATH^MYB73_ARATH^Q:37-354,H:16-124^60.55%ID^E:9.96e-42^RecName: Full=Transcription factor MYB73 {ECO:0000303|PubMed:11597504};^Eukaryota; Viridiplantae; Streptophyta; Embryophyta; Tracheophyta; Spermatophyta; Magnoliopsida; eudicotyledons; Gunneridae; Pentapetalae; rosids; malvids; Brassicales; Brassicaceae; Camelineae; Arabidopsis	MYB73_ARATH^MYB73_ARATH^Q:37-354,H:16-124^60.55%ID^E:9.96e-42^RecName: Full=Transcription factor MYB73 {ECO:0000303|PubMed:11597504};^Eukaryota; Viridiplantae; Streptophyta; Embryophyta; Tracheophyta; Spermatophyta; Magnoliopsida; eudicotyledons; Gunneridae; Pentapetalae; rosids; malvids; Brassicales; Brassicaceae; Camelineae; Arabidopsis	0	0	0	0	0	0	30	25	87	16	14	11
Pl01G0000020900.v1	Pl01	1572840	1574190	Pl01G0000020900.1.v1	291-822[+]	.	.	PF07816.12^DUF1645^Protein of unknown function (DUF1645)^100-259^E:2.6e-32	.	.	.	0	5	7	57	85	74	45	144	191	34	42	60
Pl01G0000021100.v1	Pl01	1601391	1606736	Pl01G0000021100.1.v1	625-1461[+]	KEGG:mtr:MTR_3g079630`KO:K16297	GO:0048046^cellular_component^apoplast`GO:0005615^cellular_component^extracellular space`GO:0005773^cellular_component^vacuole`GO:0004185^molecular_function^serine-type carboxypeptidase activity`GO:0036377^biological_process^arbuscular mycorrhizal association`GO:0051603^biological_process^proteolysis involved in cellular protein catabolic process`GO:0009610^biological_process^response to symbioti…	PF00450.23^Peptidase_S10^Serine carboxypeptidase^81-477^E:8.1e-133	GO:0004185^molecular_function^serine-type carboxypeptidase activity`GO:0006508^biological_process^proteolysis	SCP1_MEDTR^SCP1_MEDTR^Q:634-2079,H:11-492^56.795%ID^E:2.32e-176^RecName: Full=Serine carboxypeptidase 1 {ECO:0000303|PubMed:26511916};^Eukaryota; Viridiplantae; Streptophyta; Embryophyta; Tracheophyta; Spermatophyta; Magnoliopsida; eudicotyledons; Gunneridae; Pentapetalae; rosids; fabids; Fabales; Fabaceae; Papilionoideae; 50 kb inversion clade; NPAAA clade; Hologalegina; IRL clade; Trifolieae; M…	SCP1_MEDTR^SCP1_MEDTR^Q:634-2079,H:11-492^56.795%ID^E:2.32e-176^RecName: Full=Serine carboxypeptidase 1 {ECO:0000303|PubMed:26511916};^Eukaryota; Viridiplantae; Streptophyta; Embryophyta; Tracheophyta; Spermatophyta; Magnoliopsida; eudicotyledons; Gunneridae; Pentapetalae; rosids; fabids; Fabales; Fabaceae; Papilionoideae; 50 kb inversion clade; NPAAA clade; Hologalegina; IRL clade; Trifolieae; M…	100	86	102	1460	2022	2016	2537	3758	8257	4668	3570	3200
Pl01G0000021300.v1	Pl01	1615789	1618847	Pl01G0000021300.1.v1	1-546[+]	.	.	.	.	.	.	0	0	3	15	21	38	133	205	493	111	64	151
Pl01G0000023900.v1	Pl01	1796223	1801289	Pl01G0000023900.1.v1;Pl01G0000023900.2.v1;Pl01G0000023900.3.v1	388-1785[+];19-1575[+];123-837[+]	KEGG:ath:AT4G33330`KO:K20890;KEGG:ath:AT4G33330`KO:K20890;KEGG:ath:AT4G33330`KO:K20890	GO:0005794^cellular_component^Golgi apparatus`GO:0000139^cellular_component^Golgi membrane`GO:0016021^cellular_component^integral component of membrane`GO:0015020^molecular_function^glucuronosyltransferase activity`GO:0080116^molecular_function^glucuronoxylan glucuronosyltransferase activity`GO:0046872^molecular_function^metal ion binding`GO:0071555^biological_process^cell wall organization`GO:00…	PF01501.21^Glyco_transf_8^Glycosyl transferase family 8^305-407^E:1.8e-07;PF01501.21^Glyco_transf_8^Glycosyl transferase family 8^235-337^E:1.5e-07;PF01501.21^Glyco_transf_8^Glycosyl transferase family 8^53-91^E:4.3e-07	GO:0016757^molecular_function^transferase activity, transferring glycosyl groups;GO:0016757^molecular_function^transferase activity, transferring glycosyl groups;GO:0016757^molecular_function^transferase activity, transferring glycosyl groups	GUX2_ARATH^GUX2_ARATH^Q:424-2166,H:11-595^63.946%ID^E:0^RecName: Full=UDP-glucuronate:xylan alpha-glucuronosyltransferase 2;^Eukaryota; Viridiplantae; Streptophyta; Embryophyta; Tracheophyta; Spermatophyta; Magnoliopsida; eudicotyledons; Gunneridae; Pentapetalae; rosids; malvids; Brassicales; Brassicaceae; Camelineae; Arabidopsis;GUX2_ARATH^GUX2_ARATH^Q:7-1587,H:65-595^65.543%ID^E:0^RecName: Full…	GUX2_ARATH^GUX2_ARATH^Q:424-2166,H:11-595^63.946%ID^E:0^RecName: Full=UDP-glucuronate:xylan alpha-glucuronosyltransferase 2;^Eukaryota; Viridiplantae; Streptophyta; Embryophyta; Tracheophyta; Spermatophyta; Magnoliopsida; eudicotyledons; Gunneridae; Pentapetalae; rosids; malvids; Brassicales; Brassicaceae; Camelineae; Arabidopsis;GUX2_ARATH^GUX2_ARATH^Q:7-1587,H:65-595^65.543%ID^E:0^RecName: Full…	132	127	151	817	1227	1028	25	43	116	1453	1247	1058
Pl01G0000024000.v1	Pl01	1805351	1809572	Pl01G0000024000.1.v1;Pl01G0000024000.2.v1	32-3219[+];246-1374[+]	KEGG:ath:AT2G26570;KEGG:ath:AT2G26570	GO:0005829^cellular_component^cytosol`GO:0005777^cellular_component^peroxisome`GO:0005886^cellular_component^plasma membrane`GO:0009904^biological_process^chloroplast accumulation movement`GO:0009903^biological_process^chloroplast avoidance movement;GO:0005829^cellular_component^cytosol`GO:0005777^cellular_component^peroxisome`GO:0005886^cellular_component^plasma membrane`GO:0009904^biological_pr…	PF05701.12^WEMBL^Weak chloroplast movement under blue light^414-979^E:3.9e-237;PF05701.12^WEMBL^Weak chloroplast movement under blue light^2-364^E:3.4e-136	.;.	WEB1_ARATH^WEB1_ARATH^Q:1223-3232,H:147-805^61.037%ID^E:0^RecName: Full=Protein WEAK CHLOROPLAST MOVEMENT UNDER BLUE LIGHT 1;^Eukaryota; Viridiplantae; Streptophyta; Embryophyta; Tracheophyta; Spermatophyta; Magnoliopsida; eudicotyledons; Gunneridae; Pentapetalae; rosids; malvids; Brassicales; Brassicaceae; Camelineae; Arabidopsis;WEB1_ARATH^WEB1_ARATH^Q:3-1601,H:284-805^59.777%ID^E:3.75e-150^Rec…	WEB1_ARATH^WEB1_ARATH^Q:1223-3232,H:147-805^61.037%ID^E:0^RecName: Full=Protein WEAK CHLOROPLAST MOVEMENT UNDER BLUE LIGHT 1;^Eukaryota; Viridiplantae; Streptophyta; Embryophyta; Tracheophyta; Spermatophyta; Magnoliopsida; eudicotyledons; Gunneridae; Pentapetalae; rosids; malvids; Brassicales; Brassicaceae; Camelineae; Arabidopsis;WEB1_ARATH^WEB1_ARATH^Q:3-1601,H:284-805^59.777%ID^E:3.75e-150^Rec…	60	51	96	334	616	498	362	622	1418	500	481	449
Pl01G0000026100.v1	Pl01	2015530	2019041	Pl01G0000026100.1.v1;Pl01G0000026100.2.v1	54-867[+];87-864[+]	KEGG:ath:AT4G36930;KEGG:ath:AT4G36930	GO:0005634^cellular_component^nucleus`GO:0003677^molecular_function^DNA binding`GO:0003700^molecular_function^DNA-binding transcription factor activity`GO:0046983^molecular_function^protein dimerization activity`GO:0048440^biological_process^carpel development`GO:0007623^biological_process^circadian rhythm`GO:0010154^biological_process^fruit development`GO:0010187^biological_process^negative regu…	PF00010.27^HLH^Helix-loop-helix DNA-binding domain^119-165^E:1.9e-14;PF00010.27^HLH^Helix-loop-helix DNA-binding domain^118-164^E:1.9e-14	GO:0046983^molecular_function^protein dimerization activity;GO:0046983^molecular_function^protein dimerization activity	SPT_ARATH^SPT_ARATH^Q:399-722,H:198-306^67.89%ID^E:5.81e-25^RecName: Full=Transcription factor SPATULA;^Eukaryota; Viridiplantae; Streptophyta; Embryophyta; Tracheophyta; Spermatophyta; Magnoliopsida; eudicotyledons; Gunneridae; Pentapetalae; rosids; malvids; Brassicales; Brassicaceae; Camelineae; Arabidopsis;SPT_ARATH^SPT_ARATH^Q:429-752,H:198-306^67.89%ID^E:4.02e-25^RecName: Full=Transcription …	SPT_ARATH^SPT_ARATH^Q:399-722,H:198-306^67.89%ID^E:5.81e-25^RecName: Full=Transcription factor SPATULA;^Eukaryota; Viridiplantae; Streptophyta; Embryophyta; Tracheophyta; Spermatophyta; Magnoliopsida; eudicotyledons; Gunneridae; Pentapetalae; rosids; malvids; Brassicales; Brassicaceae; Camelineae; Arabidopsis;SPT_ARATH^SPT_ARATH^Q:429-752,H:198-306^67.89%ID^E:4.02e-25^RecName: Full=Transcription …	98	106	114	15	46	29	84	254	723	253	172	99
Pl01G0000026500.v1	Pl01	2065575	2067946	Pl01G0000026500.1.v1	347-705[+]	KEGG:ath:AT1G46480	GO:0005634^cellular_component^nucleus`GO:0003677^molecular_function^DNA binding`GO:0051301^biological_process^cell division`GO:0010087^biological_process^phloem or xylem histogenesis`GO:0010067^biological_process^procambium histogenesis`GO:0007165^biological_process^signal transduction`GO:0009888^biological_process^tissue development	PF00046.30^Homeodomain^Homeodomain^88-147^E:2.6e-18	GO:0003677^molecular_function^DNA binding	WOX4_ARATH^WOX4_ARATH^Q:347-1048,H:1-251^53.03%ID^E:3.09e-64^RecName: Full=WUSCHEL-related homeobox 4;^Eukaryota; Viridiplantae; Streptophyta; Embryophyta; Tracheophyta; Spermatophyta; Magnoliopsida; eudicotyledons; Gunneridae; Pentapetalae; rosids; malvids; Brassicales; Brassicaceae; Camelineae; Arabidopsis	WOX4_ARATH^WOX4_ARATH^Q:347-1048,H:1-251^53.03%ID^E:3.09e-64^RecName: Full=WUSCHEL-related homeobox 4;^Eukaryota; Viridiplantae; Streptophyta; Embryophyta; Tracheophyta; Spermatophyta; Magnoliopsida; eudicotyledons; Gunneridae; Pentapetalae; rosids; malvids; Brassicales; Brassicaceae; Camelineae; Arabidopsis	6069	4962	4691	653	1136	747	4457	7381	16429	621	401	447
Pl01G0000026600.v1	Pl01	2092309	2093902	Pl01G0000026600.1.v1	354-516[+]	KEGG:ath:AT1G46768`KO:K09286	GO:0005634^cellular_component^nucleus`GO:0003677^molecular_function^DNA binding`GO:0003700^molecular_function^DNA-binding transcription factor activity`GO:0009873^biological_process^ethylene-activated signaling pathway`GO:0045893^biological_process^positive regulation of transcription, DNA-templated`GO:0009409^biological_process^response to cold`GO:0009414^biological_process^response to water dep…	PF00847.21^AP2^AP2 domain^44-92^E:2.9e-11	GO:0003700^molecular_function^DNA-binding transcription factor activity`GO:0006355^biological_process^regulation of transcription, DNA-templated	RAP21_ARATH^RAP21_ARATH^Q:459-860,H:23-153^64.444%ID^E:4.45e-47^RecName: Full=Ethylene-responsive transcription factor RAP2-1;^Eukaryota; Viridiplantae; Streptophyta; Embryophyta; Tracheophyta; Spermatophyta; Magnoliopsida; eudicotyledons; Gunneridae; Pentapetalae; rosids; malvids; Brassicales; Brassicaceae; Camelineae; Arabidopsis	RAP21_ARATH^RAP21_ARATH^Q:459-860,H:23-153^64.444%ID^E:4.45e-47^RecName: Full=Ethylene-responsive transcription factor RAP2-1;^Eukaryota; Viridiplantae; Streptophyta; Embryophyta; Tracheophyta; Spermatophyta; Magnoliopsida; eudicotyledons; Gunneridae; Pentapetalae; rosids; malvids; Brassicales; Brassicaceae; Camelineae; Arabidopsis	164	127	148	726	878	737	599	1133	2875	2494	1863	1964
Pl01G0000028300.v1	Pl01	2278350	2279889	Pl01G0000028300.1.v1	1-981[+]	KEGG:ath:AT3G16150`KO:K13051	GO:0005737^cellular_component^cytoplasm`GO:0004067^molecular_function^asparaginase activity`GO:0008798^molecular_function^beta-aspartyl-peptidase activity`GO:0016540^biological_process^protein autoprocessing	PF01112.19^Asparaginase_2^Asparaginase^4-325^E:5.1e-102	GO:0016787^molecular_function^hydrolase activity	ASPGB_ARATH^ASPGB_ARATH^Q:1-978,H:1-325^85.276%ID^E:0^RecName: Full=Probable isoaspartyl peptidase/L-asparaginase 2;^Eukaryota; Viridiplantae; Streptophyta; Embryophyta; Tracheophyta; Spermatophyta; Magnoliopsida; eudicotyledons; Gunneridae; Pentapetalae; rosids; malvids; Brassicales; Brassicaceae; Camelineae; Arabidopsis	ASPGB_ARATH^ASPGB_ARATH^Q:1-978,H:1-325^85.276%ID^E:0^RecName: Full=Probable isoaspartyl peptidase/L-asparaginase 2;^Eukaryota; Viridiplantae; Streptophyta; Embryophyta; Tracheophyta; Spermatophyta; Magnoliopsida; eudicotyledons; Gunneridae; Pentapetalae; rosids; malvids; Brassicales; Brassicaceae; Camelineae; Arabidopsis	10789	8674	9411	1746	2575	2147	16932	27150	62048	6185	4514	3901
Pl01G0000028900.v1	Pl01	2328880	2329137	Pl01G0000028900.1.v1	1-258[+]	.	.	.	.	.	.	8	15	4	1	0	1	27	50	138	3	0	0
Pl01G0000029500.v1	Pl01	2390106	2392436	Pl01G0000029500.1.v1	1-2331[+]	KEGG:ath:AT5G67360	GO:0048046^cellular_component^apoplast`GO:0005618^cellular_component^cell wall`GO:0005576^cellular_component^extracellular region`GO:0099503^cellular_component^secretory vesicle`GO:0004252^molecular_function^serine-type endopeptidase activity`GO:0080001^biological_process^mucilage extrusion from seed coat`GO:0048359^biological_process^mucilage metabolic process involved in seed coat development`G…	PF05922.17^Inhibitor_I9^Peptidase inhibitor I9^41-116^E:1.1e-16`PF00082.23^Peptidase_S8^Subtilase family^140-611^E:6.9e-46`PF02225.23^PA^PA domain^379-464^E:6.3e-10`PF17766.2^fn3_6^Fibronectin type-III domain^666-772^E:4.5e-23	GO:0004252^molecular_function^serine-type endopeptidase activity`GO:0006508^biological_process^proteolysis	SBT17_ARATH^SBT17_ARATH^Q:115-2328,H:29-757^65.676%ID^E:0^RecName: Full=Subtilisin-like protease SBT1.7 {ECO:0000303|PubMed:16193095};^Eukaryota; Viridiplantae; Streptophyta; Embryophyta; Tracheophyta; Spermatophyta; Magnoliopsida; eudicotyledons; Gunneridae; Pentapetalae; rosids; malvids; Brassicales; Brassicaceae; Camelineae; Arabidopsis	SBT17_ARATH^SBT17_ARATH^Q:115-2328,H:29-757^65.676%ID^E:0^RecName: Full=Subtilisin-like protease SBT1.7 {ECO:0000303|PubMed:16193095};^Eukaryota; Viridiplantae; Streptophyta; Embryophyta; Tracheophyta; Spermatophyta; Magnoliopsida; eudicotyledons; Gunneridae; Pentapetalae; rosids; malvids; Brassicales; Brassicaceae; Camelineae; Arabidopsis	689	721	500	14607	21884	21059	2933	4008	9084	66100	49986	43357
Pl01G0000029600.v1	Pl01	2403864	2406519	Pl01G0000029600.1.v1	1-1143[+]	KEGG:ath:AT4G24230	GO:0005615^cellular_component^extracellular space`GO:0000062^molecular_function^fatty-acyl-CoA binding`GO:0008289^molecular_function^lipid binding	PF00887.20^ACBP^Acyl CoA binding protein^259-316^E:3.7e-09	GO:0000062^molecular_function^fatty-acyl-CoA binding	ACBP3_ARATH^ACBP3_ARATH^Q:736-966,H:219-294^58.442%ID^E:1.06e-21^RecName: Full=Acyl-CoA-binding domain-containing protein 3;^Eukaryota; Viridiplantae; Streptophyta; Embryophyta; Tracheophyta; Spermatophyta; Magnoliopsida; eudicotyledons; Gunneridae; Pentapetalae; rosids; malvids; Brassicales; Brassicaceae; Camelineae; Arabidopsis	ACBP3_ARATH^ACBP3_ARATH^Q:736-966,H:219-294^58.442%ID^E:1.06e-21^RecName: Full=Acyl-CoA-binding domain-containing protein 3;^Eukaryota; Viridiplantae; Streptophyta; Embryophyta; Tracheophyta; Spermatophyta; Magnoliopsida; eudicotyledons; Gunneridae; Pentapetalae; rosids; malvids; Brassicales; Brassicaceae; Camelineae; Arabidopsis	88	65	81	512	805	716	1021	1511	3259	2024	1387	1359
Pl01G0000029800.v1	Pl01	2422366	2424106	Pl01G0000029800.1.v1	1-348[+]	.	.	.	.	.	.	32	29	71	252	380	292	64	98	174	2175	1365	993
Pl01G0000029900.v1	Pl01	2429420	2430874	Pl01G0000029900.2.v1	1-354[+]	.	.	.	.	.	.	0	0	0	0	0	0	17	52	103	1155	644	401
Pl01G0000030200.v1	Pl01	2467584	2469219	Pl01G0000030200.1.v1	456-711[+]	KEGG:ath:AT1G27730	GO:0005634^cellular_component^nucleus`GO:0003700^molecular_function^DNA-binding transcription factor activity`GO:0046872^molecular_function^metal ion binding`GO:0043565^molecular_function^sequence-specific DNA binding`GO:0071456^biological_process^cellular response to hypoxia`GO:0035264^biological_process^multicellular organism growth`GO:0045892^biological_process^negative regulation of transcrip…	PF13912.7^zf-C2H2_6^C2H2-type zinc finger^80-104^E:3.2e-14`PF13894.7^zf-C2H2_4^C2H2-type zinc finger^80-102^E:0.00046`PF12874.8^zf-met^Zinc-finger of C2H2 type^80-102^E:0.048`PF13912.7^zf-C2H2_6^C2H2-type zinc finger^131-155^E:9.1e-13	.	ZAT10_ARATH^ZAT10_ARATH^Q:456-1142,H:1-227^50.407%ID^E:2.02e-46^RecName: Full=Zinc finger protein ZAT10;^Eukaryota; Viridiplantae; Streptophyta; Embryophyta; Tracheophyta; Spermatophyta; Magnoliopsida; eudicotyledons; Gunneridae; Pentapetalae; rosids; malvids; Brassicales; Brassicaceae; Camelineae; Arabidopsis	ZAT10_ARATH^ZAT10_ARATH^Q:456-1142,H:1-227^50.407%ID^E:2.02e-46^RecName: Full=Zinc finger protein ZAT10;^Eukaryota; Viridiplantae; Streptophyta; Embryophyta; Tracheophyta; Spermatophyta; Magnoliopsida; eudicotyledons; Gunneridae; Pentapetalae; rosids; malvids; Brassicales; Brassicaceae; Camelineae; Arabidopsis	65	74	63	1296	1782	1619	1543	2253	5338	1850	1480	1411
Pl01G0000031900.v1	Pl01	2642352	2644115	Pl01G0000031900.1.v1	404-1092[+]	.	.	.	.	.	.	67	88	83	218	269	241	207	364	761	7510	2938	3308
Pl01G0000032000.v1	Pl01	2649467	2650445	Pl01G0000032000.1.v1	1-723[+]	.	.	.	.	.	.	283	220	237	180	287	224	743	838	1658	1440	967	980
Pl01G0000032400.v1	Pl01	2674791	2675754	Pl01G0000032400.1.v1	1-648[+]	KEGG:ath:AT4G33800	GO:0005737^cellular_component^cytoplasm`GO:0005634^cellular_component^nucleus`GO:0009691^biological_process^cytokinin biosynthetic process`GO:0009690^biological_process^cytokinin metabolic process`GO:0009736^biological_process^cytokinin-activated signaling pathway	.	.	SOFL5_ARATH^SOFL5_ARATH^Q:52-489,H:11-164^38.125%ID^E:6.15e-13^RecName: Full=Protein SOB FIVE-LIKE 5 {ECO:0000303|PubMed:29467189};^Eukaryota; Viridiplantae; Streptophyta; Embryophyta; Tracheophyta; Spermatophyta; Magnoliopsida; eudicotyledons; Gunneridae; Pentapetalae; rosids; malvids; Brassicales; Brassicaceae; Camelineae; Arabidopsis	SOFL5_ARATH^SOFL5_ARATH^Q:52-489,H:11-164^38.125%ID^E:6.15e-13^RecName: Full=Protein SOB FIVE-LIKE 5 {ECO:0000303|PubMed:29467189};^Eukaryota; Viridiplantae; Streptophyta; Embryophyta; Tracheophyta; Spermatophyta; Magnoliopsida; eudicotyledons; Gunneridae; Pentapetalae; rosids; malvids; Brassicales; Brassicaceae; Camelineae; Arabidopsis	592	416	484	200	350	158	571	885	2092	120	113	87
Pl01G0000032700.v1	Pl01	2696398	2696987	Pl01G0000032700.1.v1	15-459[+]	.	.	.	.	.	.	362	277	266	2110	2884	2375	1770	2516	6788	4515	2845	3189
Pl01G0000032800.v1	Pl01	2711950	2712866	Pl01G0000032800.1.v1	89-255[+]	.	.	PF06404.13^PSK^Phytosulfokine precursor protein (PSK)^51-81^E:7.8e-14	GO:0008083^molecular_function^growth factor activity`GO:0008283^biological_process^cell population proliferation`GO:0005576^cellular_component^extracellular region	.	.	817	600	707	4127	5462	4958	1425	2124	4535	3644	3087	2967
Pl01G0000033500.v1	Pl01	2743907	2744329	Pl01G0000033500.1.v1	1-423[+]	.	.	PF00170.22^bZIP_1^bZIP transcription factor^57-101^E:2.3e-07	GO:0003700^molecular_function^DNA-binding transcription factor activity`GO:0006355^biological_process^regulation of transcription, DNA-templated	.	.	26	4	18	26	56	56	37	44	44	208	237	142
Pl01G0000034500.v1	Pl01	2837719	2838627	Pl01G0000034500.1.v1	101-459[+]	.	.	.	.	.	.	3	23	25	265	448	320	140	219	520	113	91	114
Pl01G0000034700.v1	Pl01	2851361	2856307	Pl01G0000034700.1.v1	490-1818[+]	KEGG:ath:AT2G22840	GO:0005634^cellular_component^nucleus`GO:0005524^molecular_function^ATP binding`GO:0019760^biological_process^glucosinolate metabolic process`GO:0061062^biological_process^regulation of nematode larval development`GO:0006355^biological_process^regulation of transcription, DNA-templated`GO:0009624^biological_process^response to nematode`GO:0048364^biological_process^root development`GO:0006351^bio…	PF08880.12^QLQ^QLQ^152-186^E:4.9e-16`PF08879.11^WRC^WRC^222-264^E:5.6e-21	GO:0005524^molecular_function^ATP binding`GO:0006355^biological_process^regulation of transcription, DNA-templated`GO:0005634^cellular_component^nucleus	GRF1_ARATH^GRF1_ARATH^Q:610-2211,H:28-488^41.336%ID^E:3.28e-91^RecName: Full=Growth-regulating factor 1;^Eukaryota; Viridiplantae; Streptophyta; Embryophyta; Tracheophyta; Spermatophyta; Magnoliopsida; eudicotyledons; Gunneridae; Pentapetalae; rosids; malvids; Brassicales; Brassicaceae; Camelineae; Arabidopsis	GRF1_ARATH^GRF1_ARATH^Q:610-2211,H:28-488^41.336%ID^E:3.28e-91^RecName: Full=Growth-regulating factor 1;^Eukaryota; Viridiplantae; Streptophyta; Embryophyta; Tracheophyta; Spermatophyta; Magnoliopsida; eudicotyledons; Gunneridae; Pentapetalae; rosids; malvids; Brassicales; Brassicaceae; Camelineae; Arabidopsis	1323	1147	1057	313	573	361	965	1673	3528	2957	1605	1252
Pl01G0000035100.v1	Pl01	2911723	2916509	Pl01G0000035100.1.v1	481-2064[+]	.	GO:0005634^cellular_component^nucleus`GO:0003677^molecular_function^DNA binding`GO:0003700^molecular_function^DNA-binding transcription factor activity`GO:0048830^biological_process^adventitious root development`GO:0080037^biological_process^negative regulation of cytokinin-activated signaling pathway	PF00847.21^AP2^AP2 domain^328-386^E:1.6e-13`PF00847.21^AP2^AP2 domain^431-480^E:4.5e-10	GO:0003700^molecular_function^DNA-binding transcription factor activity`GO:0006355^biological_process^regulation of transcription, DNA-templated	CRL5_ORYSJ^CRL5_ORYSJ^Q:1417-2538,H:272-638^62.274%ID^E:3.48e-132^RecName: Full=AP2-like ethylene-responsive transcription factor CRL5 {ECO:0000305};^Eukaryota; Viridiplantae; Streptophyta; Embryophyta; Tracheophyta; Spermatophyta; Magnoliopsida; Liliopsida; Poales; Poaceae; BOP clade; Oryzoideae; Oryzeae; Oryzinae; Oryza; Oryza sativa`CRL5_ORYSJ^CRL5_ORYSJ^Q:529-936,H:18-144^40.69%ID^E:6.22e-09^…	CRL5_ORYSJ^CRL5_ORYSJ^Q:1417-2538,H:272-638^62.274%ID^E:3.48e-132^RecName: Full=AP2-like ethylene-responsive transcription factor CRL5 {ECO:0000305};^Eukaryota; Viridiplantae; Streptophyta; Embryophyta; Tracheophyta; Spermatophyta; Magnoliopsida; Liliopsida; Poales; Poaceae; BOP clade; Oryzoideae; Oryzeae; Oryzinae; Oryza; Oryza sativa`CRL5_ORYSJ^CRL5_ORYSJ^Q:529-936,H:18-144^40.69%ID^E:6.22e-09^…	94	61	68	123	242	200	111	200	500	1117	633	825
Pl01G0000036200.v1	Pl01	3080464	3085713	Pl01G0000036200.1.v1	1-1188[+]	.	GO:0005634^cellular_component^nucleus`GO:0043565^molecular_function^sequence-specific DNA binding`GO:0006355^biological_process^regulation of transcription, DNA-templated	PF03790.14^KNOX1^KNOX1 domain^134-176^E:7.7e-21`PF03791.14^KNOX2^KNOX2 domain^189-234^E:3.7e-25`PF03789.14^ELK^ELK domain^277-298^E:1.5e-10`PF05920.12^Homeobox_KN^Homeobox KN domain^317-356^E:1.1e-16`PF00046.30^Homeodomain^Homeodomain^322-357^E:6.1e-07	GO:0003677^molecular_function^DNA binding`GO:0005634^cellular_component^nucleus`GO:0006355^biological_process^regulation of transcription, DNA-templated	KNAP2_MALDO^KNAP2_MALDO^Q:1-1185,H:1-397^68.204%ID^E:8.05e-159^RecName: Full=Homeobox protein knotted-1-like 2;^Eukaryota; Viridiplantae; Streptophyta; Embryophyta; Tracheophyta; Spermatophyta; Magnoliopsida; eudicotyledons; Gunneridae; Pentapetalae; rosids; fabids; Rosales; Rosaceae; Amygdaloideae; Maleae; Malus	KNAP2_MALDO^KNAP2_MALDO^Q:1-1185,H:1-397^68.204%ID^E:8.05e-159^RecName: Full=Homeobox protein knotted-1-like 2;^Eukaryota; Viridiplantae; Streptophyta; Embryophyta; Tracheophyta; Spermatophyta; Magnoliopsida; eudicotyledons; Gunneridae; Pentapetalae; rosids; fabids; Rosales; Rosaceae; Amygdaloideae; Maleae; Malus	60	39	33	0	11	6	0	0	0	31	42	7
Pl01G0000037900.v1	Pl01	3251754	3258585	Pl01G0000037900.1.v1;Pl01G0000037900.2.v1	217-1449[+];332-318[+]	.;.	GO:0008234^molecular_function^cysteine-type peptidase activity;GO:0008234^molecular_function^cysteine-type peptidase activity	PF01650.19^Peptidase_C13^Peptidase C13 family^47-316^E:7.3e-113;.	GO:0008233^molecular_function^peptidase activity`GO:0006508^biological_process^proteolysis;.	VPE1_PHAVU^VPE1_PHAVU^Q:280-1662,H:24-484^91.757%ID^E:0^RecName: Full=Vacuolar-processing enzyme;^Eukaryota; Viridiplantae; Streptophyta; Embryophyta; Tracheophyta; Spermatophyta; Magnoliopsida; eudicotyledons; Gunneridae; Pentapetalae; rosids; fabids; Fabales; Fabaceae; Papilionoideae; 50 kb inversion clade; NPAAA clade; indigoferoid/millettioid clade; Phaseoleae; Phaseolus;VPE1_PHAVU^VPE1_PHAVU…	VPE1_PHAVU^VPE1_PHAVU^Q:280-1662,H:24-484^91.757%ID^E:0^RecName: Full=Vacuolar-processing enzyme;^Eukaryota; Viridiplantae; Streptophyta; Embryophyta; Tracheophyta; Spermatophyta; Magnoliopsida; eudicotyledons; Gunneridae; Pentapetalae; rosids; fabids; Fabales; Fabaceae; Papilionoideae; 50 kb inversion clade; NPAAA clade; indigoferoid/millettioid clade; Phaseoleae; Phaseolus;VPE1_PHAVU^VPE1_PHAVU…	215	215	278	16932	23641	22667	33055	52725	118261	42649	30061	27697
Pl01G0000038100.v1	Pl01	3266286	3269693	Pl01G0000038100.1.v1	204-1050[+]	KEGG:ath:AT1G03590	GO:0005886^cellular_component^plasma membrane`GO:0004724^molecular_function^magnesium-dependent protein serine/threonine phosphatase activity`GO:0046872^molecular_function^metal ion binding`GO:0004722^molecular_function^protein serine/threonine phosphatase activity	PF00481.22^PP2C^Protein phosphatase 2C^61-313^E:1.7e-42	GO:0003824^molecular_function^catalytic activity	P2C01_ARATH^P2C01_ARATH^Q:204-1208,H:23-362^46.667%ID^E:6.17e-86^RecName: Full=Probable protein phosphatase 2C 1;^Eukaryota; Viridiplantae; Streptophyta; Embryophyta; Tracheophyta; Spermatophyta; Magnoliopsida; eudicotyledons; Gunneridae; Pentapetalae; rosids; malvids; Brassicales; Brassicaceae; Camelineae; Arabidopsis	P2C01_ARATH^P2C01_ARATH^Q:204-1208,H:23-362^46.667%ID^E:6.17e-86^RecName: Full=Probable protein phosphatase 2C 1;^Eukaryota; Viridiplantae; Streptophyta; Embryophyta; Tracheophyta; Spermatophyta; Magnoliopsida; eudicotyledons; Gunneridae; Pentapetalae; rosids; malvids; Brassicales; Brassicaceae; Camelineae; Arabidopsis	74	82	85	492	617	445	256	416	1218	762	527	445
Pl01G0000042100.v1	Pl01	3564218	3567178	Pl01G0000042100.1.v1	1-1809[+]	KEGG:ath:AT3G13790`KO:K01193	GO:0048046^cellular_component^apoplast`GO:0005618^cellular_component^cell wall`GO:0005886^cellular_component^plasma membrane`GO:0004564^molecular_function^beta-fructofuranosidase activity`GO:0005975^biological_process^carbohydrate metabolic process`GO:0050832^biological_process^defense response to fungus`GO:0080167^biological_process^response to karrikin`GO:0009611^biological_process^response to …	PF00251.21^Glyco_hydro_32N^Glycosyl hydrolases family 32 N-terminal domain^82-393^E:5.5e-97`PF08244.13^Glyco_hydro_32C^Glycosyl hydrolases family 32 C terminal^396-587^E:2.2e-26	.	INV1_ARATH^INV1_ARATH^Q:115-1779,H:49-583^54.594%ID^E:0^RecName: Full=Beta-fructofuranosidase, insoluble isoenzyme CWINV1;^Eukaryota; Viridiplantae; Streptophyta; Embryophyta; Tracheophyta; Spermatophyta; Magnoliopsida; eudicotyledons; Gunneridae; Pentapetalae; rosids; malvids; Brassicales; Brassicaceae; Camelineae; Arabidopsis	INV1_ARATH^INV1_ARATH^Q:115-1779,H:49-583^54.594%ID^E:0^RecName: Full=Beta-fructofuranosidase, insoluble isoenzyme CWINV1;^Eukaryota; Viridiplantae; Streptophyta; Embryophyta; Tracheophyta; Spermatophyta; Magnoliopsida; eudicotyledons; Gunneridae; Pentapetalae; rosids; malvids; Brassicales; Brassicaceae; Camelineae; Arabidopsis	192	103	143	231	336	334	510	863	2008	1058	720	674
Pl01G0000045800.v1	Pl01	3988572	3989655	Pl01G0000045800.1.v1	459-477[+]	.	GO:0005737^cellular_component^cytoplasm`GO:0043621^molecular_function^protein self-association`GO:0051082^molecular_function^unfolded protein binding`GO:0051259^biological_process^protein complex oligomerization`GO:0006457^biological_process^protein folding`GO:0009408^biological_process^response to heat`GO:0042542^biological_process^response to hydrogen peroxide`GO:0000302^biological_process^resp…	PF00011.22^HSP20^Hsp20/alpha crystallin family^52-156^E:7.8e-31`PF17886.2^ArsA_HSP20^HSP20-like domain found in ArsA^58-138^E:3.7e-07	.	HSP21_SOYBN^HSP21_SOYBN^Q:459-932,H:1-159^89.308%ID^E:1.16e-80^RecName: Full=17.9 kDa class II heat shock protein;^Eukaryota; Viridiplantae; Streptophyta; Embryophyta; Tracheophyta; Spermatophyta; Magnoliopsida; eudicotyledons; Gunneridae; Pentapetalae; rosids; fabids; Fabales; Fabaceae; Papilionoideae; 50 kb inversion clade; NPAAA clade; indigoferoid/millettioid clade; Phaseoleae; Glycine; Glyci…	HSP21_SOYBN^HSP21_SOYBN^Q:459-932,H:1-159^89.308%ID^E:1.16e-80^RecName: Full=17.9 kDa class II heat shock protein;^Eukaryota; Viridiplantae; Streptophyta; Embryophyta; Tracheophyta; Spermatophyta; Magnoliopsida; eudicotyledons; Gunneridae; Pentapetalae; rosids; fabids; Fabales; Fabaceae; Papilionoideae; 50 kb inversion clade; NPAAA clade; indigoferoid/millettioid clade; Phaseoleae; Glycine; Glyci…	853	684	737	1485	2143	1982	736	1194	2612	91	154	138
Pl01G0000045810.v1	Pl01	3991326	3992067	Pl01G0000045810.1.v1	73-477[+]	.	GO:0005737^cellular_component^cytoplasm`GO:0043621^molecular_function^protein self-association`GO:0051082^molecular_function^unfolded protein binding`GO:0051259^biological_process^protein complex oligomerization`GO:0006457^biological_process^protein folding`GO:0009408^biological_process^response to heat`GO:0042542^biological_process^response to hydrogen peroxide`GO:0000302^biological_process^resp…	PF00011.22^HSP20^Hsp20/alpha crystallin family^52-156^E:5.9e-31`PF17886.2^ArsA_HSP20^HSP20-like domain found in ArsA^58-138^E:1.1e-07	.	HSP21_SOYBN^HSP21_SOYBN^Q:73-546,H:1-159^89.308%ID^E:1.25e-91^RecName: Full=17.9 kDa class II heat shock protein;^Eukaryota; Viridiplantae; Streptophyta; Embryophyta; Tracheophyta; Spermatophyta; Magnoliopsida; eudicotyledons; Gunneridae; Pentapetalae; rosids; fabids; Fabales; Fabaceae; Papilionoideae; 50 kb inversion clade; NPAAA clade; indigoferoid/millettioid clade; Phaseoleae; Glycine; Glycin…	HSP21_SOYBN^HSP21_SOYBN^Q:73-546,H:1-159^89.308%ID^E:1.25e-91^RecName: Full=17.9 kDa class II heat shock protein;^Eukaryota; Viridiplantae; Streptophyta; Embryophyta; Tracheophyta; Spermatophyta; Magnoliopsida; eudicotyledons; Gunneridae; Pentapetalae; rosids; fabids; Fabales; Fabaceae; Papilionoideae; 50 kb inversion clade; NPAAA clade; indigoferoid/millettioid clade; Phaseoleae; Glycine; Glycin…	145	115	152	121	178	165	333	471	1248	31	35	24
Pl01G0000045900.v1	Pl01	4000816	4003478	Pl01G0000045900.1.v1	1-627[+]	KEGG:ath:AT5G26170	GO:0005634^cellular_component^nucleus`GO:0003700^molecular_function^DNA-binding transcription factor activity`GO:0043565^molecular_function^sequence-specific DNA binding`GO:0050832^biological_process^defense response to fungus`GO:0009867^biological_process^jasmonic acid mediated signaling pathway	PF03106.16^WRKY^WRKY DNA -binding domain^100-145^E:4.4e-18	GO:0003700^molecular_function^DNA-binding transcription factor activity`GO:0043565^molecular_function^sequence-specific DNA binding`GO:0006355^biological_process^regulation of transcription, DNA-templated	WRK50_ARATH^WRK50_ARATH^Q:259-450,H:100-163^76.562%ID^E:3.21e-29^RecName: Full=Probable WRKY transcription factor 50;^Eukaryota; Viridiplantae; Streptophyta; Embryophyta; Tracheophyta; Spermatophyta; Magnoliopsida; eudicotyledons; Gunneridae; Pentapetalae; rosids; malvids; Brassicales; Brassicaceae; Camelineae; Arabidopsis	WRK50_ARATH^WRK50_ARATH^Q:259-450,H:100-163^76.562%ID^E:3.21e-29^RecName: Full=Probable WRKY transcription factor 50;^Eukaryota; Viridiplantae; Streptophyta; Embryophyta; Tracheophyta; Spermatophyta; Magnoliopsida; eudicotyledons; Gunneridae; Pentapetalae; rosids; malvids; Brassicales; Brassicaceae; Camelineae; Arabidopsis	2	0	0	4	27	26	62	108	192	107	91	160
Pl01G0000046000.v1	Pl01	4004522	4005437	Pl01G0000046000.1.v1	86-216[+]	.	.	.	.	.	.	0	0	0	0	0	0	114	177	255	177	129	163
Pl01G0000046100.v1	Pl01	4010691	4013063	Pl01G0000046100.1.v1	1-2004[+]	KEGG:ath:AT5G10530	GO:0016021^cellular_component^integral component of membrane`GO:0005886^cellular_component^plasma membrane`GO:0005524^molecular_function^ATP binding`GO:0030246^molecular_function^carbohydrate binding`GO:0004675^molecular_function^transmembrane receptor protein serine/threonine kinase activity`GO:0006952^biological_process^defense response`GO:0042742^biological_process^defense response to bacteriu…	PF00139.20^Lectin_legB^Legume lectin domain^26-268^E:7.2e-65`PF00069.26^Pkinase^Protein kinase domain^354-618^E:2.5e-48`PF07714.18^PK_Tyr_Ser-Thr^Protein tyrosine and serine/threonine kinase^356-619^E:1.3e-41	GO:0030246^molecular_function^carbohydrate binding`GO:0004672^molecular_function^protein kinase activity`GO:0005524^molecular_function^ATP binding`GO:0006468^biological_process^protein phosphorylation	LRK91_ARATH^LRK91_ARATH^Q:25-1857,H:9-606^44.051%ID^E:2.35e-153^RecName: Full=L-type lectin-domain containing receptor kinase IX.1 {ECO:0000303|PubMed:19773388};^Eukaryota; Viridiplantae; Streptophyta; Embryophyta; Tracheophyta; Spermatophyta; Magnoliopsida; eudicotyledons; Gunneridae; Pentapetalae; rosids; malvids; Brassicales; Brassicaceae; Camelineae; Arabidopsis	LRK91_ARATH^LRK91_ARATH^Q:25-1857,H:9-606^44.051%ID^E:2.35e-153^RecName: Full=L-type lectin-domain containing receptor kinase IX.1 {ECO:0000303|PubMed:19773388};^Eukaryota; Viridiplantae; Streptophyta; Embryophyta; Tracheophyta; Spermatophyta; Magnoliopsida; eudicotyledons; Gunneridae; Pentapetalae; rosids; malvids; Brassicales; Brassicaceae; Camelineae; Arabidopsis	0	0	0	84	168	83	0	0	0	0	0	0
Pl01G0000046200.v1	Pl01	4025443	4027353	Pl01G0000046200.1.v1	1-1911[+]	KEGG:ath:AT5G10530	GO:0016021^cellular_component^integral component of membrane`GO:0005886^cellular_component^plasma membrane`GO:0005524^molecular_function^ATP binding`GO:0030246^molecular_function^carbohydrate binding`GO:0004675^molecular_function^transmembrane receptor protein serine/threonine kinase activity`GO:0006952^biological_process^defense response`GO:0042742^biological_process^defense response to bacteriu…	PF00139.20^Lectin_legB^Legume lectin domain^32-268^E:6.3e-56`PF18483.2^Bact_lectin^Bacterial lectin^91-249^E:3.4e-08`PF00069.26^Pkinase^Protein kinase domain^340-605^E:2.7e-51`PF07714.18^PK_Tyr_Ser-Thr^Protein tyrosine and serine/threonine kinase^342-606^E:2e-44	GO:0030246^molecular_function^carbohydrate binding`GO:0004672^molecular_function^protein kinase activity`GO:0005524^molecular_function^ATP binding`GO:0006468^biological_process^protein phosphorylation	LRK91_ARATH^LRK91_ARATH^Q:82-1860,H:13-620^43.317%ID^E:3.18e-153^RecName: Full=L-type lectin-domain containing receptor kinase IX.1 {ECO:0000303|PubMed:19773388};^Eukaryota; Viridiplantae; Streptophyta; Embryophyta; Tracheophyta; Spermatophyta; Magnoliopsida; eudicotyledons; Gunneridae; Pentapetalae; rosids; malvids; Brassicales; Brassicaceae; Camelineae; Arabidopsis	LRK91_ARATH^LRK91_ARATH^Q:82-1860,H:13-620^43.317%ID^E:3.18e-153^RecName: Full=L-type lectin-domain containing receptor kinase IX.1 {ECO:0000303|PubMed:19773388};^Eukaryota; Viridiplantae; Streptophyta; Embryophyta; Tracheophyta; Spermatophyta; Magnoliopsida; eudicotyledons; Gunneridae; Pentapetalae; rosids; malvids; Brassicales; Brassicaceae; Camelineae; Arabidopsis	3	0	0	81	124	123	0	0	0	0	0	0
Pl01G0000048000.v1	Pl01	4159313	4159740	Pl01G0000048000.1.v1	12-249[+]	.	.	.	.	.	.	17	7	20	220	260	211	236	281	623	7009	2907	3247
Pl01G0000048600.v1	Pl01	4242378	4245043	Pl01G0000048600.1.v1;Pl01G0000048600.2.v1	569-780[+];130-249[+]	KEGG:ath:AT1G80840;KEGG:ath:AT1G80840	GO:0005634^cellular_component^nucleus`GO:0003700^molecular_function^DNA-binding transcription factor activity`GO:0043565^molecular_function^sequence-specific DNA binding`GO:0042742^biological_process^defense response to bacterium`GO:0050832^biological_process^defense response to fungus`GO:0045892^biological_process^negative regulation of transcription, DNA-templated`GO:0031347^biological_process^…	PF03106.16^WRKY^WRKY DNA -binding domain^98-155^E:2.5e-22;.	GO:0003700^molecular_function^DNA-binding transcription factor activity`GO:0043565^molecular_function^sequence-specific DNA binding`GO:0006355^biological_process^regulation of transcription, DNA-templated;.	WRK40_ARATH^WRK40_ARATH^Q:575-1315,H:27-298^35.379%ID^E:3.5e-39^RecName: Full=Probable WRKY transcription factor 40 {ECO:0000303|Ref.1};^Eukaryota; Viridiplantae; Streptophyta; Embryophyta; Tracheophyta; Spermatophyta; Magnoliopsida; eudicotyledons; Gunneridae; Pentapetalae; rosids; malvids; Brassicales; Brassicaceae; Camelineae; Arabidopsis;WRK40_ARATH^WRK40_ARATH^Q:1-345,H:183-298^32.231%ID^E:7…	WRK40_ARATH^WRK40_ARATH^Q:575-1315,H:27-298^35.379%ID^E:3.5e-39^RecName: Full=Probable WRKY transcription factor 40 {ECO:0000303|Ref.1};^Eukaryota; Viridiplantae; Streptophyta; Embryophyta; Tracheophyta; Spermatophyta; Magnoliopsida; eudicotyledons; Gunneridae; Pentapetalae; rosids; malvids; Brassicales; Brassicaceae; Camelineae; Arabidopsis;WRK40_ARATH^WRK40_ARATH^Q:1-345,H:183-298^32.231%ID^E:7…	33	5	11	58	163	145	108	97	441	204	200	242
Pl01G0000049200.v1	Pl01	4341536	4346659	Pl01G0000049200.1.v1	114-1155[+]	KEGG:sce:YML018C`KO:K15289	GO:0000329^cellular_component^fungal-type vacuole membrane`GO:0016021^cellular_component^integral component of membrane	PF00892.21^EamA^EamA-like transporter family^141-204^E:2e-06	GO:0016020^cellular_component^membrane`GO:0016021^cellular_component^integral component of membrane	YMB8_YEAST^YMB8_YEAST^Q:99-1235,H:4-370^27.763%ID^E:1.02e-39^RecName: Full=Uncharacterized vacuolar membrane protein YML018C;^Eukaryota; Fungi; Dikarya; Ascomycota; Saccharomycotina; Saccharomycetes; Saccharomycetales; Saccharomycetaceae; Saccharomyces	YMB8_YEAST^YMB8_YEAST^Q:99-1235,H:4-370^27.763%ID^E:1.02e-39^RecName: Full=Uncharacterized vacuolar membrane protein YML018C;^Eukaryota; Fungi; Dikarya; Ascomycota; Saccharomycotina; Saccharomycetes; Saccharomycetales; Saccharomycetaceae; Saccharomyces	27	10	20	16	20	22	0	0	19	239	159	106
Pl01G0000049800.v1	Pl01	4401215	4405532	Pl01G0000049800.1.v1;Pl01G0000049800.2.v1;Pl01G0000049800.3.v1	84-357[+];205-2025[+];84-2640[+]	KEGG:sly:101263330`KO:K13466;KEGG:sly:101263330`KO:K13466;KEGG:sly:101263330`KO:K13466	GO:0016021^cellular_component^integral component of membrane`GO:0005886^cellular_component^plasma membrane`GO:0050832^biological_process^defense response to fungus;GO:0016021^cellular_component^integral component of membrane`GO:0005886^cellular_component^plasma membrane`GO:0050832^biological_process^defense response to fungus;GO:0016021^cellular_component^integral component of membrane`GO:0005886…	PF08263.13^LRRNT_2^Leucine rich repeat N-terminal domain^34-72^E:4e-14;PF00560.34^LRR_1^Leucine Rich Repeat^5-20^E:1100`PF13516.7^LRR_6^Leucine Rich repeat^14-21^E:15000`PF00560.34^LRR_1^Leucine Rich Repeat^58-76^E:1000`PF00560.34^LRR_1^Leucine Rich Repeat^79-98^E:16`PF13516.7^LRR_6^Leucine Rich repeat^79-91^E:150`PF00560.34^LRR_1^Leucine Rich Repeat^102-124^E:440`PF13516.7^LRR_6^Leucine Rich rep…	.;GO:0005515^molecular_function^protein binding;GO:0005515^molecular_function^protein binding	EIX2_SOLLC^EIX2_SOLLC^Q:96-359,H:7-95^32.967%ID^E:1.3e-06^RecName: Full=Receptor-like protein EIX2 {ECO:0000305};^Eukaryota; Viridiplantae; Streptophyta; Embryophyta; Tracheophyta; Spermatophyta; Magnoliopsida; eudicotyledons; Gunneridae; Pentapetalae; asterids; lamiids; Solanales; Solanaceae; Solanoideae; Solaneae; Solanum; Solanum subgen. Lycopersicon;EIX2_SOLLC^EIX2_SOLLC^Q:268-2208,H:360-1010…	EIX2_SOLLC^EIX2_SOLLC^Q:96-359,H:7-95^32.967%ID^E:1.3e-06^RecName: Full=Receptor-like protein EIX2 {ECO:0000305};^Eukaryota; Viridiplantae; Streptophyta; Embryophyta; Tracheophyta; Spermatophyta; Magnoliopsida; eudicotyledons; Gunneridae; Pentapetalae; asterids; lamiids; Solanales; Solanaceae; Solanoideae; Solaneae; Solanum; Solanum subgen. Lycopersicon;EIX2_SOLLC^EIX2_SOLLC^Q:268-2208,H:360-1010…	0	3	0	5	11	0	198	269	791	135	99	119
Pl01G0000051100.v1	Pl01	4564104	4565709	Pl01G0000051100.1.v1;Pl01G0000051100.2.v1;Pl01G0000051100.3.v1	68-327[+];68-519[+];68-597[+]	.;.;.	.;.;.	.;.;.	.;.;.	.;.;.	.;.;.	26	19	19	5	18	26	127	274	513	614	325	297
Pl01G0000051200.v1	Pl01	4566003	4566547	Pl01G0000051200.2.v1	1-414[+]	.	.	.	.	.	.	8	0	10	12	21	16	32	60	95	108	115	81
Pl01G0000052200.v1	Pl01	4685295	4688208	Pl01G0000052200.1.v1;Pl01G0000052200.2.v1	346-1161[+];219-384[+]	KEGG:ath:AT2G05940;KEGG:ath:AT1G72540	GO:0005886^cellular_component^plasma membrane`GO:0005524^molecular_function^ATP binding`GO:0004674^molecular_function^protein serine/threonine kinase activity`GO:0042742^biological_process^defense response to bacterium`GO:0006468^biological_process^protein phosphorylation;GO:0005524^molecular_function^ATP binding`GO:0004674^molecular_function^protein serine/threonine kinase activity	PF07714.18^PK_Tyr_Ser-Thr^Protein tyrosine and serine/threonine kinase^83-358^E:1.6e-48`PF00069.26^Pkinase^Protein kinase domain^85-356^E:2.2e-47;PF07714.18^PK_Tyr_Ser-Thr^Protein tyrosine and serine/threonine kinase^2-99^E:7.7e-08	GO:0004672^molecular_function^protein kinase activity`GO:0006468^biological_process^protein phosphorylation`GO:0005524^molecular_function^ATP binding;GO:0004672^molecular_function^protein kinase activity`GO:0006468^biological_process^protein phosphorylation	RIPK_ARATH^RIPK_ARATH^Q:355-1494,H:5-389^65.633%ID^E:1.75e-178^RecName: Full=Serine/threonine-protein kinase RIPK {ECO:0000305};^Eukaryota; Viridiplantae; Streptophyta; Embryophyta; Tracheophyta; Spermatophyta; Magnoliopsida; eudicotyledons; Gunneridae; Pentapetalae; rosids; malvids; Brassicales; Brassicaceae; Camelineae; Arabidopsis;Y1725_ARATH^Y1725_ARATH^Q:210-566,H:260-378^52.941%ID^E:2.51e-3…	RIPK_ARATH^RIPK_ARATH^Q:355-1494,H:5-389^65.633%ID^E:1.75e-178^RecName: Full=Serine/threonine-protein kinase RIPK {ECO:0000305};^Eukaryota; Viridiplantae; Streptophyta; Embryophyta; Tracheophyta; Spermatophyta; Magnoliopsida; eudicotyledons; Gunneridae; Pentapetalae; rosids; malvids; Brassicales; Brassicaceae; Camelineae; Arabidopsis;Y1725_ARATH^Y1725_ARATH^Q:210-566,H:260-378^52.941%ID^E:2.51e-3…	50	64	59	1233	2275	1837	248	320	765	525	527	495
Pl01G0000052400.v1	Pl01	4705996	4710915	Pl01G0000052400.1.v1	1-2028[+]	KEGG:ath:AT5G61550	GO:0005524^molecular_function^ATP binding`GO:0004674^molecular_function^protein serine/threonine kinase activity`GO:0004842^molecular_function^ubiquitin-protein transferase activity	PF00069.26^Pkinase^Protein kinase domain^379-654^E:1.6e-33`PF07714.18^PK_Tyr_Ser-Thr^Protein tyrosine and serine/threonine kinase^437-656^E:6.9e-30	GO:0004672^molecular_function^protein kinase activity`GO:0005524^molecular_function^ATP binding`GO:0006468^biological_process^protein phosphorylation	PUB52_ARATH^PUB52_ARATH^Q:742-2001,H:362-758^45.024%ID^E:3.78e-116^RecName: Full=U-box domain-containing protein 52;^Eukaryota; Viridiplantae; Streptophyta; Embryophyta; Tracheophyta; Spermatophyta; Magnoliopsida; eudicotyledons; Gunneridae; Pentapetalae; rosids; malvids; Brassicales; Brassicaceae; Camelineae; Arabidopsis	PUB52_ARATH^PUB52_ARATH^Q:742-2001,H:362-758^45.024%ID^E:3.78e-116^RecName: Full=U-box domain-containing protein 52;^Eukaryota; Viridiplantae; Streptophyta; Embryophyta; Tracheophyta; Spermatophyta; Magnoliopsida; eudicotyledons; Gunneridae; Pentapetalae; rosids; malvids; Brassicales; Brassicaceae; Camelineae; Arabidopsis	0	0	0	0	0	0	7	15	57	17	7	20
Pl01G0000052700.v1	Pl01	4739526	4741812	Pl01G0000052700.1.v1	324-1635[+]	KEGG:ath:AT3G55350	GO:0005634^cellular_component^nucleus`GO:0046872^molecular_function^metal ion binding`GO:0004518^molecular_function^nuclease activity	PF13359.7^DDE_Tnp_4^DDE superfamily endonuclease^333-489^E:1.2e-35	.	ALPL_ARATH^ALPL_ARATH^Q:933-1793,H:54-354^31.529%ID^E:1.64e-41^RecName: Full=Protein ALP1-like {ECO:0000305};^Eukaryota; Viridiplantae; Streptophyta; Embryophyta; Tracheophyta; Spermatophyta; Magnoliopsida; eudicotyledons; Gunneridae; Pentapetalae; rosids; malvids; Brassicales; Brassicaceae; Camelineae; Arabidopsis	ALPL_ARATH^ALPL_ARATH^Q:933-1793,H:54-354^31.529%ID^E:1.64e-41^RecName: Full=Protein ALP1-like {ECO:0000305};^Eukaryota; Viridiplantae; Streptophyta; Embryophyta; Tracheophyta; Spermatophyta; Magnoliopsida; eudicotyledons; Gunneridae; Pentapetalae; rosids; malvids; Brassicales; Brassicaceae; Camelineae; Arabidopsis	564	500	472	2111	3360	2659	3526	5272	11960	6280	4666	4078
Pl01G0000052900.v1	Pl01	4762862	4765530	Pl01G0000052900.1.v1	301-2013[+]	KEGG:ath:AT5G10530	GO:0016021^cellular_component^integral component of membrane`GO:0005886^cellular_component^plasma membrane`GO:0005524^molecular_function^ATP binding`GO:0030246^molecular_function^carbohydrate binding`GO:0004675^molecular_function^transmembrane receptor protein serine/threonine kinase activity`GO:0006952^biological_process^defense response`GO:0042742^biological_process^defense response to bacteriu…	PF00139.20^Lectin_legB^Legume lectin domain^26-268^E:4.2e-61`PF00069.26^Pkinase^Protein kinase domain^355-619^E:3.3e-50`PF07714.18^PK_Tyr_Ser-Thr^Protein tyrosine and serine/threonine kinase^357-620^E:3.1e-42	GO:0030246^molecular_function^carbohydrate binding`GO:0004672^molecular_function^protein kinase activity`GO:0005524^molecular_function^ATP binding`GO:0006468^biological_process^protein phosphorylation	LRK91_ARATH^LRK91_ARATH^Q:364-2202,H:17-620^46.067%ID^E:0^RecName: Full=L-type lectin-domain containing receptor kinase IX.1 {ECO:0000303|PubMed:19773388};^Eukaryota; Viridiplantae; Streptophyta; Embryophyta; Tracheophyta; Spermatophyta; Magnoliopsida; eudicotyledons; Gunneridae; Pentapetalae; rosids; malvids; Brassicales; Brassicaceae; Camelineae; Arabidopsis	LRK91_ARATH^LRK91_ARATH^Q:364-2202,H:17-620^46.067%ID^E:0^RecName: Full=L-type lectin-domain containing receptor kinase IX.1 {ECO:0000303|PubMed:19773388};^Eukaryota; Viridiplantae; Streptophyta; Embryophyta; Tracheophyta; Spermatophyta; Magnoliopsida; eudicotyledons; Gunneridae; Pentapetalae; rosids; malvids; Brassicales; Brassicaceae; Camelineae; Arabidopsis	3	4	8	0	7	3	109	118	304	256	154	152
Pl01G0000053300.v1	Pl01	4797802	4802091	Pl01G0000053300.1.v1	1-1491[+]	.	GO:0005737^cellular_component^cytoplasm`GO:0008886^molecular_function^glyceraldehyde-3-phosphate dehydrogenase (NADP+) (non-phosphorylating) activity	PF00171.23^Aldedh^Aldehyde dehydrogenase family^24-483^E:6.1e-144	GO:0016491^molecular_function^oxidoreductase activity`GO:0055114^biological_process^oxidation-reduction process	GAPN_NICPL^GAPN_NICPL^Q:1-1488,H:1-496^89.718%ID^E:0^RecName: Full=NADP-dependent glyceraldehyde-3-phosphate dehydrogenase;^Eukaryota; Viridiplantae; Streptophyta; Embryophyta; Tracheophyta; Spermatophyta; Magnoliopsida; eudicotyledons; Gunneridae; Pentapetalae; asterids; lamiids; Solanales; Solanaceae; Nicotianoideae; Nicotianeae; Nicotiana	GAPN_NICPL^GAPN_NICPL^Q:1-1488,H:1-496^89.718%ID^E:0^RecName: Full=NADP-dependent glyceraldehyde-3-phosphate dehydrogenase;^Eukaryota; Viridiplantae; Streptophyta; Embryophyta; Tracheophyta; Spermatophyta; Magnoliopsida; eudicotyledons; Gunneridae; Pentapetalae; asterids; lamiids; Solanales; Solanaceae; Nicotianoideae; Nicotianeae; Nicotiana	46	72	75	146	139	98	0	23	47	9	12	4
Pl01G0000053800.v1	Pl01	4858124	4859808	Pl01G0000053800.1.v1	4-993[+]	.	.	.	.	.	.	0	3	0	37	105	57	47	79	111	356	221	169
Pl01G0000054000.v1	Pl01	4883634	4897357	Pl01G0000054000.1.v1	1-4371[+]	KEGG:ath:AT2G25170`KO:K11643	GO:0005634^cellular_component^nucleus`GO:0005524^molecular_function^ATP binding`GO:0003677^molecular_function^DNA binding`GO:0004386^molecular_function^helicase activity`GO:0046872^molecular_function^metal ion binding`GO:0051301^biological_process^cell division`GO:0006338^biological_process^chromatin remodeling`GO:0009736^biological_process^cytokinin-activated signaling pathway`GO:0009788^biologi…	PF00628.30^PHD^PHD-finger^177-219^E:1.9e-07`PF00385.25^Chromo^Chromo (CHRromatin Organisation MOdifier) domain^319-366^E:1.7e-14`PF04851.16^ResIII^Type III restriction enzyme, res subunit^411-594^E:2.7e-11`PF00176.24^SNF2_N^SNF2 family N-terminal domain^432-713^E:3.5e-63`PF11496.9^HDA2-3^Class II histone deacetylase complex subunits 2 and 3^664-882^E:3.6e-08`PF00271.32^Helicase_C^Helicase conserv…	GO:0003677^molecular_function^DNA binding`GO:0005524^molecular_function^ATP binding`GO:0016787^molecular_function^hydrolase activity`GO:0016575^biological_process^histone deacetylation`GO:0070823^cellular_component^HDA1 complex	PKL_ARATH^PKL_ARATH^Q:298-4347,H:2-1309^58.565%ID^E:0^RecName: Full=CHD3-type chromatin-remodeling factor PICKLE;^Eukaryota; Viridiplantae; Streptophyta; Embryophyta; Tracheophyta; Spermatophyta; Magnoliopsida; eudicotyledons; Gunneridae; Pentapetalae; rosids; malvids; Brassicales; Brassicaceae; Camelineae; Arabidopsis	PKL_ARATH^PKL_ARATH^Q:298-4347,H:2-1309^58.565%ID^E:0^RecName: Full=CHD3-type chromatin-remodeling factor PICKLE;^Eukaryota; Viridiplantae; Streptophyta; Embryophyta; Tracheophyta; Spermatophyta; Magnoliopsida; eudicotyledons; Gunneridae; Pentapetalae; rosids; malvids; Brassicales; Brassicaceae; Camelineae; Arabidopsis	13	27	0	931	1311	1355	23	51	132	14017	9123	8585
Pl01G0000056600.v1	Pl01	5163078	5164433	Pl01G0000056600.1.v1	1-1356[+]	.	.	PF14111.7^DUF4283^Domain of unknown function (DUF4283)^16-85^E:1.5e-09	.	.	.	0	0	4	0	0	0	490	848	1670	554	404	437
Pl01G0000057300.v1	Pl01	5202146	5218126	Pl01G0000057300.1.v1	40-1962[+]	.	GO:0016021^cellular_component^integral component of membrane`GO:0005886^cellular_component^plasma membrane`GO:0005524^molecular_function^ATP binding`GO:0004674^molecular_function^protein serine/threonine kinase activity	PF13947.7^GUB_WAK_bind^Wall-associated receptor kinase galacturonan-binding^29-92^E:1e-15`PF07714.18^PK_Tyr_Ser-Thr^Protein tyrosine and serine/threonine kinase^347-615^E:1.3e-47`PF00069.26^Pkinase^Protein kinase domain^348-613^E:4.2e-49	GO:0030247^molecular_function^polysaccharide binding`GO:0004672^molecular_function^protein kinase activity`GO:0006468^biological_process^protein phosphorylation`GO:0005524^molecular_function^ATP binding	LRK10_WHEAT^LRK10_WHEAT^Q:706-1923,H:238-626^45.255%ID^E:1.17e-102^RecName: Full=Rust resistance kinase Lr10 {ECO:0000312|EMBL:AAC49629.1};^Eukaryota; Viridiplantae; Streptophyta; Embryophyta; Tracheophyta; Spermatophyta; Magnoliopsida; Liliopsida; Poales; Poaceae; BOP clade; Pooideae; Triticodae; Triticeae; Triticinae; Triticum	LRK10_WHEAT^LRK10_WHEAT^Q:706-1923,H:238-626^45.255%ID^E:1.17e-102^RecName: Full=Rust resistance kinase Lr10 {ECO:0000312|EMBL:AAC49629.1};^Eukaryota; Viridiplantae; Streptophyta; Embryophyta; Tracheophyta; Spermatophyta; Magnoliopsida; Liliopsida; Poales; Poaceae; BOP clade; Pooideae; Triticodae; Triticeae; Triticinae; Triticum	18	19	10	29	22	19	92	227	348	96	64	69
Pl01G0000057600.v1	Pl01	5239877	5240812	Pl01G0000057600.1.v1	1-936[+]	.	GO:0016021^cellular_component^integral component of membrane`GO:0005886^cellular_component^plasma membrane`GO:0005524^molecular_function^ATP binding`GO:0004674^molecular_function^protein serine/threonine kinase activity	PF07714.18^PK_Tyr_Ser-Thr^Protein tyrosine and serine/threonine kinase^5-273^E:4.1e-48`PF00069.26^Pkinase^Protein kinase domain^6-271^E:4.6e-49	GO:0004672^molecular_function^protein kinase activity`GO:0006468^biological_process^protein phosphorylation`GO:0005524^molecular_function^ATP binding	LRK10_WHEAT^LRK10_WHEAT^Q:46-858,H:352-626^55.273%ID^E:2.01e-103^RecName: Full=Rust resistance kinase Lr10 {ECO:0000312|EMBL:AAC49629.1};^Eukaryota; Viridiplantae; Streptophyta; Embryophyta; Tracheophyta; Spermatophyta; Magnoliopsida; Liliopsida; Poales; Poaceae; BOP clade; Pooideae; Triticodae; Triticeae; Triticinae; Triticum	LRK10_WHEAT^LRK10_WHEAT^Q:46-858,H:352-626^55.273%ID^E:2.01e-103^RecName: Full=Rust resistance kinase Lr10 {ECO:0000312|EMBL:AAC49629.1};^Eukaryota; Viridiplantae; Streptophyta; Embryophyta; Tracheophyta; Spermatophyta; Magnoliopsida; Liliopsida; Poales; Poaceae; BOP clade; Pooideae; Triticodae; Triticeae; Triticinae; Triticum	4	0	0	0	4	0	103	102	217	35	53	22
Pl01G0000057800.v1	Pl01	5258123	5259058	Pl01G0000057800.1.v1	1-936[+]	.	GO:0016021^cellular_component^integral component of membrane`GO:0005886^cellular_component^plasma membrane`GO:0005524^molecular_function^ATP binding`GO:0004674^molecular_function^protein serine/threonine kinase activity	PF07714.18^PK_Tyr_Ser-Thr^Protein tyrosine and serine/threonine kinase^5-273^E:7e-48`PF00069.26^Pkinase^Protein kinase domain^6-271^E:1.4e-47	GO:0004672^molecular_function^protein kinase activity`GO:0006468^biological_process^protein phosphorylation`GO:0005524^molecular_function^ATP binding	LRK10_WHEAT^LRK10_WHEAT^Q:58-858,H:356-626^54.244%ID^E:4.55e-102^RecName: Full=Rust resistance kinase Lr10 {ECO:0000312|EMBL:AAC49629.1};^Eukaryota; Viridiplantae; Streptophyta; Embryophyta; Tracheophyta; Spermatophyta; Magnoliopsida; Liliopsida; Poales; Poaceae; BOP clade; Pooideae; Triticodae; Triticeae; Triticinae; Triticum	LRK10_WHEAT^LRK10_WHEAT^Q:58-858,H:356-626^54.244%ID^E:4.55e-102^RecName: Full=Rust resistance kinase Lr10 {ECO:0000312|EMBL:AAC49629.1};^Eukaryota; Viridiplantae; Streptophyta; Embryophyta; Tracheophyta; Spermatophyta; Magnoliopsida; Liliopsida; Poales; Poaceae; BOP clade; Pooideae; Triticodae; Triticeae; Triticinae; Triticum	0	0	0	0	2	0	78	72	183	39	56	30
Pl01G0000058400.v1	Pl01	5304848	5310410	Pl01G0000058400.1.v1;Pl01G0000058400.2.v1	45-1155[+];27-1830[+]	KEGG:ath:AT1G80490;KEGG:ath:AT1G80490	GO:0005829^cellular_component^cytosol`GO:0005634^cellular_component^nucleus`GO:0010072^biological_process^primary shoot apical meristem specification`GO:0006355^biological_process^regulation of transcription, DNA-templated;GO:0005829^cellular_component^cytosol`GO:0005634^cellular_component^nucleus`GO:0010072^biological_process^primary shoot apical meristem specification`GO:0006355^biological_proc…	PF00400.33^WD40^WD domain, G-beta repeat^193-230^E:5.5e-06;PF00400.33^WD40^WD domain, G-beta repeat^418-455^E:1e-05	GO:0005515^molecular_function^protein binding;GO:0005515^molecular_function^protein binding	TPR1_ARATH^TPR1_ARATH^Q:63-1184,H:714-1090^46.579%ID^E:1.33e-102^RecName: Full=Topless-related protein 1;^Eukaryota; Viridiplantae; Streptophyta; Embryophyta; Tracheophyta; Spermatophyta; Magnoliopsida; eudicotyledons; Gunneridae; Pentapetalae; rosids; malvids; Brassicales; Brassicaceae; Camelineae; Arabidopsis;TPR1_ARATH^TPR1_ARATH^Q:600-1841,H:676-1090^44.524%ID^E:3.91e-101^RecName: Full=Toples…	TPR1_ARATH^TPR1_ARATH^Q:63-1184,H:714-1090^46.579%ID^E:1.33e-102^RecName: Full=Topless-related protein 1;^Eukaryota; Viridiplantae; Streptophyta; Embryophyta; Tracheophyta; Spermatophyta; Magnoliopsida; eudicotyledons; Gunneridae; Pentapetalae; rosids; malvids; Brassicales; Brassicaceae; Camelineae; Arabidopsis;TPR1_ARATH^TPR1_ARATH^Q:600-1841,H:676-1090^44.524%ID^E:3.91e-101^RecName: Full=Toples…	47	37	66	240	638	466	77	188	397	243	150	72
Pl01G0000059500.v1	Pl01	5405700	5407500	Pl01G0000059500.1.v1	1128-365[+]	.	.	.	.	.	.	10	8	11	0	0	0	77	107	275	66	57	23
Pl01G0000059600.v1	Pl01	5420171	5423825	Pl01G0000059600.1.v1;Pl01G0000059600.2.v1	141-582[+];64-651[+]	KEGG:ath:AT5G11160`KO:K00759;KEGG:ath:AT5G11160`KO:K00759	GO:0005829^cellular_component^cytosol`GO:0003999^molecular_function^adenine phosphoribosyltransferase activity`GO:0006168^biological_process^adenine salvage`GO:0044209^biological_process^AMP salvage`GO:0006166^biological_process^purine ribonucleoside salvage;GO:0005829^cellular_component^cytosol`GO:0003999^molecular_function^adenine phosphoribosyltransferase activity`GO:0006168^biological_process…	PF00156.28^Pribosyltran^Phosphoribosyl transferase domain^44-164^E:2.5e-16;PF00156.28^Pribosyltran^Phosphoribosyl transferase domain^93-187^E:2.8e-13	GO:0009116^biological_process^nucleoside metabolic process;GO:0009116^biological_process^nucleoside metabolic process	APT5_ARATH^APT5_ARATH^Q:141-713,H:1-189^74.869%ID^E:1.91e-94^RecName: Full=Adenine phosphoribosyltransferase 5;^Eukaryota; Viridiplantae; Streptophyta; Embryophyta; Tracheophyta; Spermatophyta; Magnoliopsida; eudicotyledons; Gunneridae; Pentapetalae; rosids; malvids; Brassicales; Brassicaceae; Camelineae; Arabidopsis;APT5_ARATH^APT5_ARATH^Q:64-705,H:1-189^66.822%ID^E:2.51e-89^RecName: Full=Adenin…	APT5_ARATH^APT5_ARATH^Q:141-713,H:1-189^74.869%ID^E:1.91e-94^RecName: Full=Adenine phosphoribosyltransferase 5;^Eukaryota; Viridiplantae; Streptophyta; Embryophyta; Tracheophyta; Spermatophyta; Magnoliopsida; eudicotyledons; Gunneridae; Pentapetalae; rosids; malvids; Brassicales; Brassicaceae; Camelineae; Arabidopsis;APT5_ARATH^APT5_ARATH^Q:64-705,H:1-189^66.822%ID^E:2.51e-89^RecName: Full=Adenin…	682	592	465	75	119	101	241	500	1192	66	64	56
Pl01G0000059800.v1	Pl01	5447066	5453940	Pl01G0000059800.1.v1	9-1905[+]	KEGG:ath:AT5G13530`KO:K16279	GO:0005769^cellular_component^early endosome`GO:0005802^cellular_component^trans-Golgi network`GO:0005524^molecular_function^ATP binding`GO:0046872^molecular_function^metal ion binding`GO:0004672^molecular_function^protein kinase activity`GO:0043621^molecular_function^protein self-association`GO:0004674^molecular_function^protein serine/threonine kinase activity`GO:0004842^molecular_function^ubiq…	PF07714.18^PK_Tyr_Ser-Thr^Protein tyrosine and serine/threonine kinase^45-308^E:2.9e-28`PF00069.26^Pkinase^Protein kinase domain^48-307^E:6.8e-22	GO:0004672^molecular_function^protein kinase activity`GO:0006468^biological_process^protein phosphorylation`GO:0005524^molecular_function^ATP binding	KEG_ARATH^KEG_ARATH^Q:231-959,H:171-433^31.343%ID^E:2.06e-33^RecName: Full=E3 ubiquitin-protein ligase KEG;^Eukaryota; Viridiplantae; Streptophyta; Embryophyta; Tracheophyta; Spermatophyta; Magnoliopsida; eudicotyledons; Gunneridae; Pentapetalae; rosids; malvids; Brassicales; Brassicaceae; Camelineae; Arabidopsis`KEG_ARATH^KEG_ARATH^Q:1248-1607,H:1498-1618^27.907%ID^E:8.76e-07^RecName: Full=E3 ub…	KEG_ARATH^KEG_ARATH^Q:231-959,H:171-433^31.343%ID^E:2.06e-33^RecName: Full=E3 ubiquitin-protein ligase KEG;^Eukaryota; Viridiplantae; Streptophyta; Embryophyta; Tracheophyta; Spermatophyta; Magnoliopsida; eudicotyledons; Gunneridae; Pentapetalae; rosids; malvids; Brassicales; Brassicaceae; Camelineae; Arabidopsis`KEG_ARATH^KEG_ARATH^Q:1248-1607,H:1498-1618^27.907%ID^E:8.76e-07^RecName: Full=E3 ub…	152	119	156	637	875	825	828	1421	3166	1639	1329	1039
Pl01G0000060100.v1	Pl01	5484758	5488268	Pl01G0000060100.2.v1;Pl01G0000060100.1.v1	41-1851[+];41-1827[+]	.;.	.;.	.;.	.;.	.;.	.;.	142	111	111	29	21	20	115	183	417	11	18	8
Pl01G0000061600.v1	Pl01	5684562	5689315	Pl01G0000061600.1.v1	320-1527[+]	.	GO:0020037^molecular_function^heme binding`GO:0005506^molecular_function^iron ion binding`GO:0004497^molecular_function^monooxygenase activity`GO:0016705^molecular_function^oxidoreductase activity, acting on paired donors, with incorporation or reduction of molecular oxygen	PF00067.23^p450^Cytochrome P450^39-491^E:1.6e-98	GO:0005506^molecular_function^iron ion binding`GO:0016705^molecular_function^oxidoreductase activity, acting on paired donors, with incorporation or reduction of molecular oxygen`GO:0020037^molecular_function^heme binding`GO:0055114^biological_process^oxidation-reduction process	C71DB_LOTJA^C71DB_LOTJA^Q:377-1837,H:1-484^59.1%ID^E:0^RecName: Full=Cytochrome P450 71D11;^Eukaryota; Viridiplantae; Streptophyta; Embryophyta; Tracheophyta; Spermatophyta; Magnoliopsida; eudicotyledons; Gunneridae; Pentapetalae; rosids; fabids; Fabales; Fabaceae; Papilionoideae; 50 kb inversion clade; NPAAA clade; Hologalegina; robinioid clade; Loteae; Lotus	C71DB_LOTJA^C71DB_LOTJA^Q:377-1837,H:1-484^59.1%ID^E:0^RecName: Full=Cytochrome P450 71D11;^Eukaryota; Viridiplantae; Streptophyta; Embryophyta; Tracheophyta; Spermatophyta; Magnoliopsida; eudicotyledons; Gunneridae; Pentapetalae; rosids; fabids; Fabales; Fabaceae; Papilionoideae; 50 kb inversion clade; NPAAA clade; Hologalegina; robinioid clade; Loteae; Lotus	0	0	0	1455	2082	1619	59	115	252	4587	3089	2616
Pl01G0000062400.v1	Pl01	5742740	5788272	Pl01G0000062400.1.v1	71-3903[+]	KEGG:ath:AT3G10180`KO:K11498	GO:0005871^cellular_component^kinesin complex`GO:0005874^cellular_component^microtubule`GO:0005524^molecular_function^ATP binding`GO:0016887^molecular_function^ATPase activity`GO:0008017^molecular_function^microtubule binding`GO:0003777^molecular_function^microtubule motor activity`GO:0007018^biological_process^microtubule-based movement	PF00225.24^Kinesin^Kinesin motor domain^36-323^E:4.9e-106`PF16796.6^Microtub_bd^Microtubule binding^36-134^E:7e-22	GO:0003777^molecular_function^microtubule motor activity`GO:0005524^molecular_function^ATP binding`GO:0008017^molecular_function^microtubule binding`GO:0007018^biological_process^microtubule-based movement	KN7O_ARATH^KN7O_ARATH^Q:71-3958,H:1-1268^54.545%ID^E:0^RecName: Full=Kinesin-like protein KIN-7O {ECO:0000305};^Eukaryota; Viridiplantae; Streptophyta; Embryophyta; Tracheophyta; Spermatophyta; Magnoliopsida; eudicotyledons; Gunneridae; Pentapetalae; rosids; malvids; Brassicales; Brassicaceae; Camelineae; Arabidopsis	KN7O_ARATH^KN7O_ARATH^Q:71-3958,H:1-1268^54.545%ID^E:0^RecName: Full=Kinesin-like protein KIN-7O {ECO:0000305};^Eukaryota; Viridiplantae; Streptophyta; Embryophyta; Tracheophyta; Spermatophyta; Magnoliopsida; eudicotyledons; Gunneridae; Pentapetalae; rosids; malvids; Brassicales; Brassicaceae; Camelineae; Arabidopsis	2197	1447	1502	1459	2328	2042	365	586	1149	357	372	227
Pl01G0000063400.v1	Pl01	5909011	5911030	Pl01G0000063400.1.v1	1-1296[+]	KEGG:ag:CCD27744`KO:K21272	GO:0071949^molecular_function^FAD binding`GO:0004497^molecular_function^monooxygenase activity	PF13450.7^NAD_binding_8^NAD(P)-binding Rossmann-like domain^12-41^E:2.3e-05`PF01494.20^FAD_binding_3^FAD binding domain^143-372^E:1e-05	GO:0071949^molecular_function^FAD binding	AUAG_STIAU^AUAG_STIAU^Q:334-1155,H:105-348^28.261%ID^E:1e-20^RecName: Full=Aurachin C monooxygenase/isomerase {ECO:0000305};^Bacteria; Proteobacteria; Deltaproteobacteria; Myxococcales; Cystobacterineae; Archangiaceae; Stigmatella	AUAG_STIAU^AUAG_STIAU^Q:334-1155,H:105-348^28.261%ID^E:1e-20^RecName: Full=Aurachin C monooxygenase/isomerase {ECO:0000305};^Bacteria; Proteobacteria; Deltaproteobacteria; Myxococcales; Cystobacterineae; Archangiaceae; Stigmatella	834	582	625	503	682	639	202	341	724	115	147	110
Pl01G0000064200.v1	Pl01	5955916	5970000	Pl01G0000064200.1.v1	136-4257[+]	.	GO:0016021^cellular_component^integral component of membrane`GO:0005886^cellular_component^plasma membrane`GO:0005524^molecular_function^ATP binding`GO:0016887^molecular_function^ATPase activity`GO:0009914^biological_process^hormone transport`GO:2000032^biological_process^regulation of secondary shoot formation	PF14510.7^ABC_trans_N^ABC-transporter N-terminal^90-141^E:2.6e-07`PF00005.28^ABC_tran^ABC transporter^158-320^E:1.5e-09`PF19055.1^ABC2_membrane_7^ABC-2 type transporter^353-405^E:2.3e-06`PF01061.25^ABC2_membrane^ABC-2 type transporter^474-686^E:6.8e-39`PF08370.12^PDR_assoc^Plant PDR ABC transporter associated^691-752^E:8.6e-29`PF00005.28^ABC_tran^ABC transporter^849-1001^E:2.3e-18`PF01061.25^ABC2…	GO:0005524^molecular_function^ATP binding`GO:0016887^molecular_function^ATPase activity`GO:0016020^cellular_component^membrane	PDR1_PETHY^PDR1_PETHY^Q:157-4389,H:9-1452^70.014%ID^E:0^RecName: Full=Pleiotropic drug resistance protein 1 {ECO:0000303|PubMed:22398443};^Eukaryota; Viridiplantae; Streptophyta; Embryophyta; Tracheophyta; Spermatophyta; Magnoliopsida; eudicotyledons; Gunneridae; Pentapetalae; asterids; lamiids; Solanales; Solanaceae; Petunioideae; Petunia	PDR1_PETHY^PDR1_PETHY^Q:157-4389,H:9-1452^70.014%ID^E:0^RecName: Full=Pleiotropic drug resistance protein 1 {ECO:0000303|PubMed:22398443};^Eukaryota; Viridiplantae; Streptophyta; Embryophyta; Tracheophyta; Spermatophyta; Magnoliopsida; eudicotyledons; Gunneridae; Pentapetalae; asterids; lamiids; Solanales; Solanaceae; Petunioideae; Petunia	1043	804	869	1475	2423	1999	77	139	278	313	121	137
Pl01G0000064500.v1	Pl01	6002646	6003440	Pl01G0000064500.1.v1	1-795[+]	KEGG:nta:107775016`KEGG:nta:107776229`KO:K08912	GO:0009941^cellular_component^chloroplast envelope`GO:0009535^cellular_component^chloroplast thylakoid membrane`GO:0016021^cellular_component^integral component of membrane`GO:0009522^cellular_component^photosystem I`GO:0009523^cellular_component^photosystem II`GO:0010287^cellular_component^plastoglobule`GO:0016168^molecular_function^chlorophyll binding`GO:0046872^molecular_function^metal ion bin…	PF00504.22^Chloroa_b-bind^Chlorophyll A-B binding protein^64-230^E:6.8e-50	.	CB22_TOBAC^CB22_TOBAC^Q:1-792,H:1-265^90.566%ID^E:2.08e-180^RecName: Full=Chlorophyll a-b binding protein 21, chloroplastic;^Eukaryota; Viridiplantae; Streptophyta; Embryophyta; Tracheophyta; Spermatophyta; Magnoliopsida; eudicotyledons; Gunneridae; Pentapetalae; asterids; lamiids; Solanales; Solanaceae; Nicotianoideae; Nicotianeae; Nicotiana	CB22_TOBAC^CB22_TOBAC^Q:1-792,H:1-265^90.566%ID^E:2.08e-180^RecName: Full=Chlorophyll a-b binding protein 21, chloroplastic;^Eukaryota; Viridiplantae; Streptophyta; Embryophyta; Tracheophyta; Spermatophyta; Magnoliopsida; eudicotyledons; Gunneridae; Pentapetalae; asterids; lamiids; Solanales; Solanaceae; Nicotianoideae; Nicotianeae; Nicotiana	56972	49436	52429	9382	14912	11745	69322	108958	250747	12197	9979	9141
Pl01G0000064700.v1	Pl01	6027576	6029899	Pl01G0000064700.1.v1	1-1206[+]	KEGG:ath:AT5G11320`KO:K11816	GO:0005829^cellular_component^cytosol`GO:0005783^cellular_component^endoplasmic reticulum`GO:0005789^cellular_component^endoplasmic reticulum membrane`GO:0005794^cellular_component^Golgi apparatus`GO:0000139^cellular_component^Golgi membrane`GO:0005654^cellular_component^nucleoplasm`GO:0103075^molecular_function^indole-3-pyruvate monooxygenase activity`GO:0047434^molecular_function^indolepyruvate…	PF13738.7^Pyr_redox_3^Pyridine nucleotide-disulphide oxidoreductase^15-206^E:9.4e-27`PF07992.15^Pyr_redox_2^Pyridine nucleotide-disulphide oxidoreductase^15-205^E:2.7e-10`PF00743.20^FMO-like^Flavin-binding monooxygenase-like^16-326^E:1.4e-26`PF13450.7^NAD_binding_8^NAD(P)-binding Rossmann-like domain^16-82^E:2e-05`PF13434.7^K_oxygenase^L-lysine 6-monooxygenase (NADPH-requiring)^76-198^E:2.4e-11	GO:0016491^molecular_function^oxidoreductase activity`GO:0055114^biological_process^oxidation-reduction process`GO:0004499^molecular_function^N,N-dimethylaniline monooxygenase activity`GO:0050660^molecular_function^flavin adenine dinucleotide binding`GO:0050661^molecular_function^NADP binding	YUC4_ARATH^YUC4_ARATH^Q:1-1197,H:1-406^67.734%ID^E:0^RecName: Full=Probable indole-3-pyruvate monooxygenase YUCCA4;^Eukaryota; Viridiplantae; Streptophyta; Embryophyta; Tracheophyta; Spermatophyta; Magnoliopsida; eudicotyledons; Gunneridae; Pentapetalae; rosids; malvids; Brassicales; Brassicaceae; Camelineae; Arabidopsis	YUC4_ARATH^YUC4_ARATH^Q:1-1197,H:1-406^67.734%ID^E:0^RecName: Full=Probable indole-3-pyruvate monooxygenase YUCCA4;^Eukaryota; Viridiplantae; Streptophyta; Embryophyta; Tracheophyta; Spermatophyta; Magnoliopsida; eudicotyledons; Gunneridae; Pentapetalae; rosids; malvids; Brassicales; Brassicaceae; Camelineae; Arabidopsis	0	5	0	40	13	36	0	0	4	52	48	70
Pl01G0000065600.v1	Pl01	6094384	6096958	Pl01G0000065600.1.v1	1-954[+]	.	GO:0051213^molecular_function^dioxygenase activity`GO:0046872^molecular_function^metal ion binding	PF14226.7^DIOX_N^non-haem dioxygenase in morphine synthesis N-terminal^8-88^E:2e-14`PF03171.21^2OG-FeII_Oxy^2OG-Fe(II) oxygenase superfamily^176-265^E:1.3e-15	GO:0016491^molecular_function^oxidoreductase activity`GO:0055114^biological_process^oxidation-reduction process	AOP1L_ARATH^AOP1L_ARATH^Q:7-945,H:9-320^38.08%ID^E:2.18e-63^RecName: Full=Probable 2-oxoglutarate-dependent dioxygenase AOP1.2;^Eukaryota; Viridiplantae; Streptophyta; Embryophyta; Tracheophyta; Spermatophyta; Magnoliopsida; eudicotyledons; Gunneridae; Pentapetalae; rosids; malvids; Brassicales; Brassicaceae; Camelineae; Arabidopsis	AOP1L_ARATH^AOP1L_ARATH^Q:7-945,H:9-320^38.08%ID^E:2.18e-63^RecName: Full=Probable 2-oxoglutarate-dependent dioxygenase AOP1.2;^Eukaryota; Viridiplantae; Streptophyta; Embryophyta; Tracheophyta; Spermatophyta; Magnoliopsida; eudicotyledons; Gunneridae; Pentapetalae; rosids; malvids; Brassicales; Brassicaceae; Camelineae; Arabidopsis	1169	1316	1365	7203	11131	8968	1615	2402	5716	12513	8958	7991
Pl01G0000065800.v1	Pl01	6103525	6105783	Pl01G0000065800.1.v1	1-1410[+]	.	GO:0051213^molecular_function^dioxygenase activity`GO:0046872^molecular_function^metal ion binding	PF14226.7^DIOX_N^non-haem dioxygenase in morphine synthesis N-terminal^8-87^E:4e-13`PF03171.21^2OG-FeII_Oxy^2OG-Fe(II) oxygenase superfamily^326-417^E:5.5e-14	GO:0016491^molecular_function^oxidoreductase activity`GO:0055114^biological_process^oxidation-reduction process	AOP1L_ARATH^AOP1L_ARATH^Q:823-1398,H:125-320^41.206%ID^E:8.84e-34^RecName: Full=Probable 2-oxoglutarate-dependent dioxygenase AOP1.2;^Eukaryota; Viridiplantae; Streptophyta; Embryophyta; Tracheophyta; Spermatophyta; Magnoliopsida; eudicotyledons; Gunneridae; Pentapetalae; rosids; malvids; Brassicales; Brassicaceae; Camelineae; Arabidopsis`AOP1L_ARATH^AOP1L_ARATH^Q:7-342,H:9-115^37.5%ID^E:6.86e-14…	AOP1L_ARATH^AOP1L_ARATH^Q:823-1398,H:125-320^41.206%ID^E:8.84e-34^RecName: Full=Probable 2-oxoglutarate-dependent dioxygenase AOP1.2;^Eukaryota; Viridiplantae; Streptophyta; Embryophyta; Tracheophyta; Spermatophyta; Magnoliopsida; eudicotyledons; Gunneridae; Pentapetalae; rosids; malvids; Brassicales; Brassicaceae; Camelineae; Arabidopsis`AOP1L_ARATH^AOP1L_ARATH^Q:7-342,H:9-115^37.5%ID^E:6.86e-14…	63	45	73	206	304	251	13	0	0	5	4	10
Pl01G0000067300.v1	Pl01	6315806	6317206	Pl01G0000067300.1.v1	1-1401[+]	KEGG:ath:AT2G25680	GO:0016021^cellular_component^integral component of membrane`GO:0031966^cellular_component^mitochondrial membrane`GO:0005739^cellular_component^mitochondrion`GO:0005773^cellular_component^vacuole`GO:0015098^molecular_function^molybdate ion transmembrane transporter activity`GO:0015689^biological_process^molybdate ion transport	PF16983.6^MFS_MOT1^Molybdate transporter of MFS superfamily^45-160^E:3.1e-27`PF16983.6^MFS_MOT1^Molybdate transporter of MFS superfamily^289-407^E:3.7e-33	GO:0015098^molecular_function^molybdate ion transmembrane transporter activity`GO:0015689^biological_process^molybdate ion transport	MOT1_ARATH^MOT1_ARATH^Q:34-1377,H:3-444^64%ID^E:5.71e-173^RecName: Full=Molybdate transporter 1;^Eukaryota; Viridiplantae; Streptophyta; Embryophyta; Tracheophyta; Spermatophyta; Magnoliopsida; eudicotyledons; Gunneridae; Pentapetalae; rosids; malvids; Brassicales; Brassicaceae; Camelineae; Arabidopsis	MOT1_ARATH^MOT1_ARATH^Q:34-1377,H:3-444^64%ID^E:5.71e-173^RecName: Full=Molybdate transporter 1;^Eukaryota; Viridiplantae; Streptophyta; Embryophyta; Tracheophyta; Spermatophyta; Magnoliopsida; eudicotyledons; Gunneridae; Pentapetalae; rosids; malvids; Brassicales; Brassicaceae; Camelineae; Arabidopsis	9	16	6	22	52	12	133	108	247	412	266	284
Pl01G0000067400.v1	Pl01	6321414	6322886	Pl01G0000067400.1.v1	1-1473[+]	KEGG:ath:AT2G25680	GO:0016021^cellular_component^integral component of membrane`GO:0031966^cellular_component^mitochondrial membrane`GO:0005739^cellular_component^mitochondrion`GO:0005773^cellular_component^vacuole`GO:0015098^molecular_function^molybdate ion transmembrane transporter activity`GO:0015689^biological_process^molybdate ion transport	PF16983.6^MFS_MOT1^Molybdate transporter of MFS superfamily^57-172^E:7e-29`PF16983.6^MFS_MOT1^Molybdate transporter of MFS superfamily^306-424^E:1.9e-32	GO:0015098^molecular_function^molybdate ion transmembrane transporter activity`GO:0015689^biological_process^molybdate ion transport	MOT1_ARATH^MOT1_ARATH^Q:148-1437,H:29-447^67.13%ID^E:3.15e-177^RecName: Full=Molybdate transporter 1;^Eukaryota; Viridiplantae; Streptophyta; Embryophyta; Tracheophyta; Spermatophyta; Magnoliopsida; eudicotyledons; Gunneridae; Pentapetalae; rosids; malvids; Brassicales; Brassicaceae; Camelineae; Arabidopsis	MOT1_ARATH^MOT1_ARATH^Q:148-1437,H:29-447^67.13%ID^E:3.15e-177^RecName: Full=Molybdate transporter 1;^Eukaryota; Viridiplantae; Streptophyta; Embryophyta; Tracheophyta; Spermatophyta; Magnoliopsida; eudicotyledons; Gunneridae; Pentapetalae; rosids; malvids; Brassicales; Brassicaceae; Camelineae; Arabidopsis	83	34	63	21	56	24	64	57	146	12	0	4
Pl01G0000068000.v1	Pl01	6355250	6356387	Pl01G0000068000.1.v1	1-285[+]	KEGG:ath:AT1G55300`KO:K03132	GO:0005669^cellular_component^transcription factor TFIID complex`GO:0035035^molecular_function^histone acetyltransferase binding`GO:0003713^molecular_function^transcription coactivator activity`GO:0008134^molecular_function^transcription factor binding`GO:0000976^molecular_function^transcription regulatory region sequence-specific DNA binding`GO:0006357^biological_process^regulation of transcript…	.	.	TAF7_ARATH^TAF7_ARATH^Q:1-132,H:1-43^65.909%ID^E:4.84e-10^RecName: Full=Transcription initiation factor TFIID subunit 7;^Eukaryota; Viridiplantae; Streptophyta; Embryophyta; Tracheophyta; Spermatophyta; Magnoliopsida; eudicotyledons; Gunneridae; Pentapetalae; rosids; malvids; Brassicales; Brassicaceae; Camelineae; Arabidopsis	TAF7_ARATH^TAF7_ARATH^Q:1-132,H:1-43^65.909%ID^E:4.84e-10^RecName: Full=Transcription initiation factor TFIID subunit 7;^Eukaryota; Viridiplantae; Streptophyta; Embryophyta; Tracheophyta; Spermatophyta; Magnoliopsida; eudicotyledons; Gunneridae; Pentapetalae; rosids; malvids; Brassicales; Brassicaceae; Camelineae; Arabidopsis	43	23	14	19	17	46	362	514	1037	633	451	451
Pl01G0000068400.v1	Pl01	6379455	6383801	Pl01G0000068400.1.v1	1-1962[+]	KEGG:ath:AT3G13560`KO:K19892	GO:0031225^cellular_component^anchored component of membrane`GO:0046658^cellular_component^anchored component of plasma membrane`GO:0005829^cellular_component^cytosol`GO:0005886^cellular_component^plasma membrane`GO:0042973^molecular_function^glucan endo-1,3-beta-D-glucosidase activity`GO:0005975^biological_process^carbohydrate metabolic process`GO:0006952^biological_process^defense response	PF04658.14^TAFII55_N^TAFII55 protein conserved region^2-138^E:1.1e-29`PF00332.19^Glyco_hydro_17^Glycosyl hydrolases family 17^233-491^E:3.1e-55`PF07983.14^X8^X8 domain^505-576^E:7.1e-20	GO:0006367^biological_process^transcription initiation from RNA polymerase II promoter`GO:0005669^cellular_component^transcription factor TFIID complex`GO:0004553^molecular_function^hydrolase activity, hydrolyzing O-glycosyl compounds`GO:0005975^biological_process^carbohydrate metabolic process	E134_ARATH^E134_ARATH^Q:574-1767,H:23-446^64.623%ID^E:0^RecName: Full=Glucan endo-1,3-beta-glucosidase 4;^Eukaryota; Viridiplantae; Streptophyta; Embryophyta; Tracheophyta; Spermatophyta; Magnoliopsida; eudicotyledons; Gunneridae; Pentapetalae; rosids; malvids; Brassicales; Brassicaceae; Camelineae; Arabidopsis	E134_ARATH^E134_ARATH^Q:574-1767,H:23-446^64.623%ID^E:0^RecName: Full=Glucan endo-1,3-beta-glucosidase 4;^Eukaryota; Viridiplantae; Streptophyta; Embryophyta; Tracheophyta; Spermatophyta; Magnoliopsida; eudicotyledons; Gunneridae; Pentapetalae; rosids; malvids; Brassicales; Brassicaceae; Camelineae; Arabidopsis	381	318	339	298	399	281	57	112	218	85	51	53
Pl01G0000072200.v1	Pl01	6782097	6784610	Pl01G0000072200.1.v1	192-984[+]	KEGG:ath:AT2G18980`KO:K00430	GO:0005576^cellular_component^extracellular region`GO:0020037^molecular_function^heme binding`GO:0046872^molecular_function^metal ion binding`GO:0004601^molecular_function^peroxidase activity`GO:0042744^biological_process^hydrogen peroxide catabolic process`GO:0006979^biological_process^response to oxidative stress	PF00141.24^peroxidase^Peroxidase^43-291^E:6.2e-71	GO:0004601^molecular_function^peroxidase activity`GO:0020037^molecular_function^heme binding`GO:0006979^biological_process^response to oxidative stress`GO:0055114^biological_process^oxidation-reduction process	PER16_ARATH^PER16_ARATH^Q:231-1172,H:13-323^64.013%ID^E:1.65e-145^RecName: Full=Peroxidase 16;^Eukaryota; Viridiplantae; Streptophyta; Embryophyta; Tracheophyta; Spermatophyta; Magnoliopsida; eudicotyledons; Gunneridae; Pentapetalae; rosids; malvids; Brassicales; Brassicaceae; Camelineae; Arabidopsis	PER16_ARATH^PER16_ARATH^Q:231-1172,H:13-323^64.013%ID^E:1.65e-145^RecName: Full=Peroxidase 16;^Eukaryota; Viridiplantae; Streptophyta; Embryophyta; Tracheophyta; Spermatophyta; Magnoliopsida; eudicotyledons; Gunneridae; Pentapetalae; rosids; malvids; Brassicales; Brassicaceae; Camelineae; Arabidopsis	20	32	12	729	1073	1070	42	93	180	2006	1157	922
Pl01G0000072900.v1	Pl01	6866678	6868178	Pl01G0000072900.1.v1	204-717[+]	.	.	.	.	.	.	79	112	98	313	486	411	749	988	2002	1557	894	871
Pl01G0000074600.v1	Pl01	7112920	7118693	Pl01G0000074600.1.v1	355-2343[+]	KEGG:ath:AT2G19410	GO:0005524^molecular_function^ATP binding`GO:0004674^molecular_function^protein serine/threonine kinase activity`GO:0004842^molecular_function^ubiquitin-protein transferase activity	PF00582.27^Usp^Universal stress protein family^18-163^E:1e-09`PF00069.26^Pkinase^Protein kinase domain^464-696^E:1.8e-40`PF07714.18^PK_Tyr_Ser-Thr^Protein tyrosine and serine/threonine kinase^467-718^E:2e-35	GO:0004672^molecular_function^protein kinase activity`GO:0005524^molecular_function^ATP binding`GO:0006468^biological_process^protein phosphorylation	PUB34_ARATH^PUB34_ARATH^Q:1369-2562,H:317-714^51.005%ID^E:9.33e-117^RecName: Full=U-box domain-containing protein 34;^Eukaryota; Viridiplantae; Streptophyta; Embryophyta; Tracheophyta; Spermatophyta; Magnoliopsida; eudicotyledons; Gunneridae; Pentapetalae; rosids; malvids; Brassicales; Brassicaceae; Camelineae; Arabidopsis	PUB34_ARATH^PUB34_ARATH^Q:1369-2562,H:317-714^51.005%ID^E:9.33e-117^RecName: Full=U-box domain-containing protein 34;^Eukaryota; Viridiplantae; Streptophyta; Embryophyta; Tracheophyta; Spermatophyta; Magnoliopsida; eudicotyledons; Gunneridae; Pentapetalae; rosids; malvids; Brassicales; Brassicaceae; Camelineae; Arabidopsis	0	0	0	0	0	0	19	24	18	15	13	28
Pl01G0000076600.v1	Pl01	7308773	7310813	Pl01G0000076600.1.v1	74-591[+]	KEGG:ath:AT5G53190`KO:K15382	GO:0016021^cellular_component^integral component of membrane`GO:0005887^cellular_component^integral component of plasma membrane`GO:0051119^molecular_function^sugar transmembrane transporter activity`GO:0008643^biological_process^carbohydrate transport	PF03083.17^MtN3_slv^Sugar efflux transporter for intercellular exchange^84-167^E:1.2e-23	GO:0016021^cellular_component^integral component of membrane	SWET3_ARATH^SWET3_ARATH^Q:2-661,H:26-253^52.632%ID^E:2.7e-75^RecName: Full=Bidirectional sugar transporter SWEET3 {ECO:0000303|PubMed:21107422};^Eukaryota; Viridiplantae; Streptophyta; Embryophyta; Tracheophyta; Spermatophyta; Magnoliopsida; eudicotyledons; Gunneridae; Pentapetalae; rosids; malvids; Brassicales; Brassicaceae; Camelineae; Arabidopsis	SWET3_ARATH^SWET3_ARATH^Q:2-661,H:26-253^52.632%ID^E:2.7e-75^RecName: Full=Bidirectional sugar transporter SWEET3 {ECO:0000303|PubMed:21107422};^Eukaryota; Viridiplantae; Streptophyta; Embryophyta; Tracheophyta; Spermatophyta; Magnoliopsida; eudicotyledons; Gunneridae; Pentapetalae; rosids; malvids; Brassicales; Brassicaceae; Camelineae; Arabidopsis	820	623	757	91	188	148	156	220	448	265	196	211
Pl01G0000078800.v1	Pl01	7582173	7589978	Pl01G0000078800.1.v1	281-1578[+]	KEGG:ath:AT1G77110`KO:K13947	GO:0005789^cellular_component^endoplasmic reticulum membrane`GO:0016021^cellular_component^integral component of membrane`GO:0005886^cellular_component^plasma membrane`GO:0009926^biological_process^auxin polar transport`GO:0009734^biological_process^auxin-activated signaling pathway`GO:0010540^biological_process^basipetal auxin transport`GO:0010105^biological_process^negative regulation of ethyle…	PF03547.19^Mem_trans^Membrane transport protein^10-520^E:2.5e-167	GO:0055085^biological_process^transmembrane transport`GO:0016021^cellular_component^integral component of membrane	PIN6_ARATH^PIN6_ARATH^Q:281-1855,H:1-570^64.837%ID^E:0^RecName: Full=Auxin efflux carrier component 6 {ECO:0000303|PubMed:15817418};^Eukaryota; Viridiplantae; Streptophyta; Embryophyta; Tracheophyta; Spermatophyta; Magnoliopsida; eudicotyledons; Gunneridae; Pentapetalae; rosids; malvids; Brassicales; Brassicaceae; Camelineae; Arabidopsis	PIN6_ARATH^PIN6_ARATH^Q:281-1855,H:1-570^64.837%ID^E:0^RecName: Full=Auxin efflux carrier component 6 {ECO:0000303|PubMed:15817418};^Eukaryota; Viridiplantae; Streptophyta; Embryophyta; Tracheophyta; Spermatophyta; Magnoliopsida; eudicotyledons; Gunneridae; Pentapetalae; rosids; malvids; Brassicales; Brassicaceae; Camelineae; Arabidopsis	378	280	291	92	151	131	257	222	558	53	30	12
Pl01G0000078900.v1	Pl01	7595265	7598554	Pl01G0000078900.1.v1	1-1149[+]	.	GO:0005737^cellular_component^cytoplasm`GO:0004022^molecular_function^alcohol dehydrogenase (NAD+) activity`GO:0008270^molecular_function^zinc ion binding	PF08240.13^ADH_N^Alcohol dehydrogenase GroES-like domain^36-163^E:2.5e-23`PF00107.27^ADH_zinc_N^Zinc-binding dehydrogenase^206-330^E:3.2e-24	GO:0055114^biological_process^oxidation-reduction process	ADH1_PEA^ADH1_PEA^Q:1-1119,H:1-373^89.544%ID^E:0^RecName: Full=Alcohol dehydrogenase 1 {ECO:0000303|PubMed:3309331};^Eukaryota; Viridiplantae; Streptophyta; Embryophyta; Tracheophyta; Spermatophyta; Magnoliopsida; eudicotyledons; Gunneridae; Pentapetalae; rosids; fabids; Fabales; Fabaceae; Papilionoideae; 50 kb inversion clade; NPAAA clade; Hologalegina; IRL clade; Fabeae; Pisum	ADH1_PEA^ADH1_PEA^Q:1-1119,H:1-373^89.544%ID^E:0^RecName: Full=Alcohol dehydrogenase 1 {ECO:0000303|PubMed:3309331};^Eukaryota; Viridiplantae; Streptophyta; Embryophyta; Tracheophyta; Spermatophyta; Magnoliopsida; eudicotyledons; Gunneridae; Pentapetalae; rosids; fabids; Fabales; Fabaceae; Papilionoideae; 50 kb inversion clade; NPAAA clade; Hologalegina; IRL clade; Fabeae; Pisum	309	482	539	2236	3242	3165	682	923	1949	8401	5710	5299
Pl01G0000079000.v1	Pl01	7601729	7603776	Pl01G0000079000.1.v1	182-1161[+]	KEGG:ath:AT1G43800`KO:K03921	GO:0009570^cellular_component^chloroplast stroma`GO:0045300^molecular_function^acyl-[acyl-carrier-protein] desaturase activity`GO:0046872^molecular_function^metal ion binding`GO:0102786^molecular_function^stearoyl-[acp] desaturase activity`GO:0071456^biological_process^cellular response to hypoxia`GO:0006633^biological_process^fatty acid biosynthetic process`GO:0006631^biological_process^fatty ac…	PF03405.15^FA_desaturase_2^Fatty acid desaturase^54-380^E:8.4e-153	GO:0045300^molecular_function^acyl-[acyl-carrier-protein] desaturase activity`GO:0006631^biological_process^fatty acid metabolic process`GO:0055114^biological_process^oxidation-reduction process	STAD6_ARATH^STAD6_ARATH^Q:284-1333,H:39-389^75.783%ID^E:0^RecName: Full=Stearoyl-[acyl-carrier-protein] 9-desaturase 6, chloroplastic;^Eukaryota; Viridiplantae; Streptophyta; Embryophyta; Tracheophyta; Spermatophyta; Magnoliopsida; eudicotyledons; Gunneridae; Pentapetalae; rosids; malvids; Brassicales; Brassicaceae; Camelineae; Arabidopsis	STAD6_ARATH^STAD6_ARATH^Q:284-1333,H:39-389^75.783%ID^E:0^RecName: Full=Stearoyl-[acyl-carrier-protein] 9-desaturase 6, chloroplastic;^Eukaryota; Viridiplantae; Streptophyta; Embryophyta; Tracheophyta; Spermatophyta; Magnoliopsida; eudicotyledons; Gunneridae; Pentapetalae; rosids; malvids; Brassicales; Brassicaceae; Camelineae; Arabidopsis	626	532	426	1754	3208	2576	1428	1796	4303	4149	2524	2270
Pl01G0000079900.v1	Pl01	7755718	7756992	Pl01G0000079900.1.v1	17-165[+]	.	.	.	.	.	.	0	0	0	0	0	0	119	107	229	84	61	57
Pl01G0000080000.v1	Pl01	7760969	7762742	Pl01G0000080000.1.v1	292-999[+]	.	.	.	.	.	.	336	327	300	1187	2016	1637	1361	1968	4534	3916	2747	2500
Pl01G0000080600.v1	Pl01	7848170	7850837	Pl01G0000080600.2.v1	1-936[+]	KEGG:ath:AT1G76990	GO:0005829^cellular_component^cytosol`GO:0016597^molecular_function^amino acid binding	PF01842.26^ACT^ACT domain^37-85^E:9.4e-07`PF01842.26^ACT^ACT domain^130-167^E:1.6e-08	.	ACR3_ARATH^ACR3_ARATH^Q:1-933,H:1-313^71.885%ID^E:1.71e-168^RecName: Full=ACT domain-containing protein ACR3 {ECO:0000305};^Eukaryota; Viridiplantae; Streptophyta; Embryophyta; Tracheophyta; Spermatophyta; Magnoliopsida; eudicotyledons; Gunneridae; Pentapetalae; rosids; malvids; Brassicales; Brassicaceae; Camelineae; Arabidopsis`ACR3_ARATH^ACR3_ARATH^Q:67-597,H:252-412^24.157%ID^E:9.11e-07^RecNam…	ACR3_ARATH^ACR3_ARATH^Q:1-933,H:1-313^71.885%ID^E:1.71e-168^RecName: Full=ACT domain-containing protein ACR3 {ECO:0000305};^Eukaryota; Viridiplantae; Streptophyta; Embryophyta; Tracheophyta; Spermatophyta; Magnoliopsida; eudicotyledons; Gunneridae; Pentapetalae; rosids; malvids; Brassicales; Brassicaceae; Camelineae; Arabidopsis`ACR3_ARATH^ACR3_ARATH^Q:67-597,H:252-412^24.157%ID^E:9.11e-07^RecNam…	41	49	27	211	235	270	58	133	226	205	137	118
Pl01G0000082200.v1	Pl01	8003380	8007523	Pl01G0000082200.1.v1	1-2262[+]	KEGG:ath:AT1G21270	GO:0016021^cellular_component^integral component of membrane`GO:0005634^cellular_component^nucleus`GO:0005886^cellular_component^plasma membrane`GO:0005524^molecular_function^ATP binding`GO:0005509^molecular_function^calcium ion binding`GO:0030247^molecular_function^polysaccharide binding`GO:0004674^molecular_function^protein serine/threonine kinase activity`GO:0007166^biological_process^cell sur…	PF13947.7^GUB_WAK_bind^Wall-associated receptor kinase galacturonan-binding^34-90^E:7.6e-09`PF07645.16^EGF_CA^Calcium-binding EGF domain^298-331^E:7.9e-07`PF00069.26^Pkinase^Protein kinase domain^427-688^E:2.1e-50`PF07714.18^PK_Tyr_Ser-Thr^Protein tyrosine and serine/threonine kinase^428-692^E:9e-48	GO:0030247^molecular_function^polysaccharide binding`GO:0005509^molecular_function^calcium ion binding`GO:0004672^molecular_function^protein kinase activity`GO:0005524^molecular_function^ATP binding`GO:0006468^biological_process^protein phosphorylation	WAK2_ARATH^WAK2_ARATH^Q:100-2259,H:29-732^45.192%ID^E:0^RecName: Full=Wall-associated receptor kinase 2;^Eukaryota; Viridiplantae; Streptophyta; Embryophyta; Tracheophyta; Spermatophyta; Magnoliopsida; eudicotyledons; Gunneridae; Pentapetalae; rosids; malvids; Brassicales; Brassicaceae; Camelineae; Arabidopsis	WAK2_ARATH^WAK2_ARATH^Q:100-2259,H:29-732^45.192%ID^E:0^RecName: Full=Wall-associated receptor kinase 2;^Eukaryota; Viridiplantae; Streptophyta; Embryophyta; Tracheophyta; Spermatophyta; Magnoliopsida; eudicotyledons; Gunneridae; Pentapetalae; rosids; malvids; Brassicales; Brassicaceae; Camelineae; Arabidopsis	6	4	13	97	254	182	27	47	112	14	8	23
Pl01G0000083200.v1	Pl01	8181785	8186294	Pl01G0000083200.1.v1	1-1185[+]	.	GO:0005737^cellular_component^cytoplasm`GO:0004022^molecular_function^alcohol dehydrogenase (NAD+) activity`GO:0008270^molecular_function^zinc ion binding	PF08240.13^ADH_N^Alcohol dehydrogenase GroES-like domain^50-177^E:1.1e-21`PF00107.27^ADH_zinc_N^Zinc-binding dehydrogenase^220-347^E:1.2e-23	GO:0055114^biological_process^oxidation-reduction process	ADH1_TRIRP^ADH1_TRIRP^Q:1-1182,H:1-380^76.904%ID^E:0^RecName: Full=Alcohol dehydrogenase 1;^Eukaryota; Viridiplantae; Streptophyta; Embryophyta; Tracheophyta; Spermatophyta; Magnoliopsida; eudicotyledons; Gunneridae; Pentapetalae; rosids; fabids; Fabales; Fabaceae; Papilionoideae; 50 kb inversion clade; NPAAA clade; Hologalegina; IRL clade; Trifolieae; Trifolium	ADH1_TRIRP^ADH1_TRIRP^Q:1-1182,H:1-380^76.904%ID^E:0^RecName: Full=Alcohol dehydrogenase 1;^Eukaryota; Viridiplantae; Streptophyta; Embryophyta; Tracheophyta; Spermatophyta; Magnoliopsida; eudicotyledons; Gunneridae; Pentapetalae; rosids; fabids; Fabales; Fabaceae; Papilionoideae; 50 kb inversion clade; NPAAA clade; Hologalegina; IRL clade; Trifolieae; Trifolium	31338	25857	28371	94708	145748	114645	12404	20524	43170	295257	228521	213558
Pl01G0000084000.v1	Pl01	8314620	8316190	Pl01G0000084000.1.v1	71-1170[+]	.	GO:0016210^molecular_function^naringenin-chalcone synthase activity`GO:0009813^biological_process^flavonoid biosynthetic process	PF00195.20^Chal_sti_synt_N^Chalcone and stilbene synthases, N-terminal domain^5-227^E:4.9e-112`PF08392.13^FAE1_CUT1_RppA^FAE1/Type III polyketide synthase-like protein^147-242^E:4e-05`PF08545.11^ACP_syn_III^3-Oxoacyl-[acyl-carrier-protein (ACP)] synthase III^161-230^E:1.5e-05`PF02797.16^Chal_sti_synt_C^Chalcone and stilbene synthases, C-terminal domain^238-387^E:2.5e-65`PF08541.11^ACP_syn_III_C^3…	GO:0016747^molecular_function^transferase activity, transferring acyl groups other than amino-acyl groups`GO:0006633^biological_process^fatty acid biosynthetic process`GO:0016020^cellular_component^membrane`GO:0004315^molecular_function^3-oxoacyl-[acyl-carrier-protein] synthase activity	CHS4_MEDSA^CHS4_MEDSA^Q:71-1237,H:1-389^74.55%ID^E:0^RecName: Full=Chalcone synthase 4;^Eukaryota; Viridiplantae; Streptophyta; Embryophyta; Tracheophyta; Spermatophyta; Magnoliopsida; eudicotyledons; Gunneridae; Pentapetalae; rosids; fabids; Fabales; Fabaceae; Papilionoideae; 50 kb inversion clade; NPAAA clade; Hologalegina; IRL clade; Trifolieae; Medicago	CHS4_MEDSA^CHS4_MEDSA^Q:71-1237,H:1-389^74.55%ID^E:0^RecName: Full=Chalcone synthase 4;^Eukaryota; Viridiplantae; Streptophyta; Embryophyta; Tracheophyta; Spermatophyta; Magnoliopsida; eudicotyledons; Gunneridae; Pentapetalae; rosids; fabids; Fabales; Fabaceae; Papilionoideae; 50 kb inversion clade; NPAAA clade; Hologalegina; IRL clade; Trifolieae; Medicago	10	0	4	0	0	0	89	78	188	0	0	6
Pl01G0000086200.v1	Pl01	8500137	8501156	Pl01G0000086200.1.v1	1-1020[+]	.	GO:0016021^cellular_component^integral component of membrane`GO:0005886^cellular_component^plasma membrane`GO:0005524^molecular_function^ATP binding`GO:0004674^molecular_function^protein serine/threonine kinase activity	PF07714.18^PK_Tyr_Ser-Thr^Protein tyrosine and serine/threonine kinase^17-285^E:4.9e-49`PF00069.26^Pkinase^Protein kinase domain^18-283^E:5.4e-49	GO:0004672^molecular_function^protein kinase activity`GO:0006468^biological_process^protein phosphorylation`GO:0005524^molecular_function^ATP binding	LRK10_WHEAT^LRK10_WHEAT^Q:4-894,H:326-626^53.488%ID^E:5.36e-116^RecName: Full=Rust resistance kinase Lr10 {ECO:0000312|EMBL:AAC49629.1};^Eukaryota; Viridiplantae; Streptophyta; Embryophyta; Tracheophyta; Spermatophyta; Magnoliopsida; Liliopsida; Poales; Poaceae; BOP clade; Pooideae; Triticodae; Triticeae; Triticinae; Triticum	LRK10_WHEAT^LRK10_WHEAT^Q:4-894,H:326-626^53.488%ID^E:5.36e-116^RecName: Full=Rust resistance kinase Lr10 {ECO:0000312|EMBL:AAC49629.1};^Eukaryota; Viridiplantae; Streptophyta; Embryophyta; Tracheophyta; Spermatophyta; Magnoliopsida; Liliopsida; Poales; Poaceae; BOP clade; Pooideae; Triticodae; Triticeae; Triticinae; Triticum	0	0	0	11	4	21	74	56	166	52	23	27
Pl01G0000086400.v1	Pl01	8520141	8521624	Pl01G0000086400.1.v1	1-837[+]	.	.	PF13947.7^GUB_WAK_bind^Wall-associated receptor kinase galacturonan-binding^23-86^E:2.6e-17	GO:0030247^molecular_function^polysaccharide binding	.	.	4	9	13	3	20	7	54	84	115	83	45	42
Pl01G0000086800.v1	Pl01	8544336	8546651	Pl01G0000086800.1.v1	1-2163[+]	.	.	.	.	.	.	0	0	0	0	0	0	145	194	398	211	152	84
Pl01G0000087900.v1	Pl01	8662710	8666182	Pl01G0000087900.1.v1	1-2718[+]	KEGG:ath:AT1G74170	GO:0016021^cellular_component^integral component of membrane`GO:0005886^cellular_component^plasma membrane	PF13516.7^LRR_6^Leucine Rich repeat^14-29^E:1200`PF00560.34^LRR_1^Leucine Rich Repeat^15-37^E:17`PF13516.7^LRR_6^Leucine Rich repeat^38-52^E:4.8`PF00560.34^LRR_1^Leucine Rich Repeat^39-55^E:9.5`PF13516.7^LRR_6^Leucine Rich repeat^63-75^E:7.5`PF00560.34^LRR_1^Leucine Rich Repeat^65-75^E:570`PF13516.7^LRR_6^Leucine Rich repeat^90-101^E:7800`PF13516.7^LRR_6^Leucine Rich repeat^113-126^E:490`PF00560.…	GO:0005515^molecular_function^protein binding	RLP13_ARATH^RLP13_ARATH^Q:40-2658,H:164-1026^35.033%ID^E:7.1e-116^RecName: Full=Receptor-like protein 13 {ECO:0000303|PubMed:18434605};^Eukaryota; Viridiplantae; Streptophyta; Embryophyta; Tracheophyta; Spermatophyta; Magnoliopsida; eudicotyledons; Gunneridae; Pentapetalae; rosids; malvids; Brassicales; Brassicaceae; Camelineae; Arabidopsis	RLP13_ARATH^RLP13_ARATH^Q:40-2658,H:164-1026^35.033%ID^E:7.1e-116^RecName: Full=Receptor-like protein 13 {ECO:0000303|PubMed:18434605};^Eukaryota; Viridiplantae; Streptophyta; Embryophyta; Tracheophyta; Spermatophyta; Magnoliopsida; eudicotyledons; Gunneridae; Pentapetalae; rosids; malvids; Brassicales; Brassicaceae; Camelineae; Arabidopsis	0	0	0	0	0	0	101	161	398	140	39	119
Pl01G0000092200.v1	Pl01	9197576	9199136	Pl01G0000092200.1.v1	1-666[+]	KEGG:ath:AT1G21360	GO:0005829^cellular_component^cytosol`GO:0016020^cellular_component^membrane`GO:1902387^molecular_function^ceramide 1-phosphate binding`GO:1902388^molecular_function^ceramide 1-phosphate transfer activity`GO:0008289^molecular_function^lipid binding`GO:0035627^biological_process^ceramide transport`GO:0120009^biological_process^intermembrane lipid transfer	PF08718.12^GLTP^Glycolipid transfer protein (GLTP)^38-178^E:4.3e-37	GO:0120013^molecular_function^lipid transfer activity`GO:0120009^biological_process^intermembrane lipid transfer`GO:0005737^cellular_component^cytoplasm	GLTP2_ARATH^GLTP2_ARATH^Q:1-660,H:1-222^49.55%ID^E:4.37e-77^RecName: Full=Glycolipid transfer protein 2 {ECO:0000303|PubMed:16309699};^Eukaryota; Viridiplantae; Streptophyta; Embryophyta; Tracheophyta; Spermatophyta; Magnoliopsida; eudicotyledons; Gunneridae; Pentapetalae; rosids; malvids; Brassicales; Brassicaceae; Camelineae; Arabidopsis	GLTP2_ARATH^GLTP2_ARATH^Q:1-660,H:1-222^49.55%ID^E:4.37e-77^RecName: Full=Glycolipid transfer protein 2 {ECO:0000303|PubMed:16309699};^Eukaryota; Viridiplantae; Streptophyta; Embryophyta; Tracheophyta; Spermatophyta; Magnoliopsida; eudicotyledons; Gunneridae; Pentapetalae; rosids; malvids; Brassicales; Brassicaceae; Camelineae; Arabidopsis	0	0	0	0	0	7	0	0	0	21	18	33
Pl01G0000093700.v1	Pl01	9367694	9370793	Pl01G0000093700.1.v1;Pl01G0000093700.2.v1	52-1941[+];1068-1026[+]	KEGG:ath:AT5G03795;KEGG:ath:AT5G03795	GO:0000139^cellular_component^Golgi membrane`GO:0016021^cellular_component^integral component of membrane`GO:0016757^molecular_function^transferase activity, transferring glycosyl groups`GO:0071555^biological_process^cell wall organization`GO:0006486^biological_process^protein glycosylation;GO:0000139^cellular_component^Golgi membrane`GO:0016021^cellular_component^integral component of membrane`G…	PF03016.16^Exostosin^Exostosin family^315-595^E:5e-60;PF03016.16^Exostosin^Exostosin family^10-290^E:8.1e-61	.;.	GLYT3_ARATH^GLYT3_ARATH^Q:859-1971,H:138-511^44.974%ID^E:2.74e-107^RecName: Full=Probable glycosyltransferase At5g03795;^Eukaryota; Viridiplantae; Streptophyta; Embryophyta; Tracheophyta; Spermatophyta; Magnoliopsida; eudicotyledons; Gunneridae; Pentapetalae; rosids; malvids; Brassicales; Brassicaceae; Camelineae; Arabidopsis;GLYT3_ARATH^GLYT3_ARATH^Q:960-2072,H:138-511^44.974%ID^E:6.05e-106^RecN…	GLYT3_ARATH^GLYT3_ARATH^Q:859-1971,H:138-511^44.974%ID^E:2.74e-107^RecName: Full=Probable glycosyltransferase At5g03795;^Eukaryota; Viridiplantae; Streptophyta; Embryophyta; Tracheophyta; Spermatophyta; Magnoliopsida; eudicotyledons; Gunneridae; Pentapetalae; rosids; malvids; Brassicales; Brassicaceae; Camelineae; Arabidopsis;GLYT3_ARATH^GLYT3_ARATH^Q:960-2072,H:138-511^44.974%ID^E:6.05e-106^RecN…	40	55	21	172	249	337	97	149	346	1083	703	482
Pl01G0000094900.v1	Pl01	9530805	9541813	Pl01G0000094900.1.v1	123-1734[+]	KEGG:ath:AT5G63860	GO:0000785^cellular_component^chromatin`GO:0005829^cellular_component^cytosol`GO:0005634^cellular_component^nucleus`GO:0009536^cellular_component^plastid`GO:0003682^molecular_function^chromatin binding`GO:0005085^molecular_function^guanyl-nucleotide exchange factor activity`GO:0042802^molecular_function^identical protein binding`GO:0009881^molecular_function^photoreceptor activity`GO:0042803^mole…	PF13540.7^RCC1_2^Regulator of chromosome condensation (RCC1) repeat^13-37^E:5.8e-07`PF00415.19^RCC1^Regulator of chromosome condensation (RCC1) repeat^29-81^E:2e-13`PF13540.7^RCC1_2^Regulator of chromosome condensation (RCC1) repeat^68-97^E:1e-08`PF00415.19^RCC1^Regulator of chromosome condensation (RCC1) repeat^84-163^E:0.00013`PF13540.7^RCC1_2^Regulator of chromosome condensation (RCC1) repeat^…	.	UVR8_ARATH^UVR8_ARATH^Q:126-1427,H:8-374^29.025%ID^E:1.27e-30^RecName: Full=Ultraviolet-B receptor UVR8;^Eukaryota; Viridiplantae; Streptophyta; Embryophyta; Tracheophyta; Spermatophyta; Magnoliopsida; eudicotyledons; Gunneridae; Pentapetalae; rosids; malvids; Brassicales; Brassicaceae; Camelineae; Arabidopsis`UVR8_ARATH^UVR8_ARATH^Q:156-908,H:121-380^28.114%ID^E:5.37e-13^RecName: Full=Ultraviole…	UVR8_ARATH^UVR8_ARATH^Q:126-1427,H:8-374^29.025%ID^E:1.27e-30^RecName: Full=Ultraviolet-B receptor UVR8;^Eukaryota; Viridiplantae; Streptophyta; Embryophyta; Tracheophyta; Spermatophyta; Magnoliopsida; eudicotyledons; Gunneridae; Pentapetalae; rosids; malvids; Brassicales; Brassicaceae; Camelineae; Arabidopsis`UVR8_ARATH^UVR8_ARATH^Q:156-908,H:121-380^28.114%ID^E:5.37e-13^RecName: Full=Ultraviole…	0	4	3	504	705	630	977	1277	2698	2944	1994	1758
Pl01G0000096400.v1	Pl01	9802747	9809461	Pl01G0000096400.1.v1	1-1446[+]	KEGG:ath:AT3G09710	GO:0005737^cellular_component^cytoplasm`GO:0005874^cellular_component^microtubule`GO:0005634^cellular_component^nucleus`GO:0005516^molecular_function^calmodulin binding`GO:0008017^molecular_function^microtubule binding	PF00612.28^IQ^IQ calmodulin-binding motif^114-134^E:5.9e-07`PF00612.28^IQ^IQ calmodulin-binding motif^140-155^E:0.19	GO:0005515^molecular_function^protein binding	IQD1_ARATH^IQD1_ARATH^Q:307-942,H:100-271^35.849%ID^E:3.49e-12^RecName: Full=Protein IQ-DOMAIN 1 {ECO:0000303|PubMed:15960618};^Eukaryota; Viridiplantae; Streptophyta; Embryophyta; Tracheophyta; Spermatophyta; Magnoliopsida; eudicotyledons; Gunneridae; Pentapetalae; rosids; malvids; Brassicales; Brassicaceae; Camelineae; Arabidopsis	IQD1_ARATH^IQD1_ARATH^Q:307-942,H:100-271^35.849%ID^E:3.49e-12^RecName: Full=Protein IQ-DOMAIN 1 {ECO:0000303|PubMed:15960618};^Eukaryota; Viridiplantae; Streptophyta; Embryophyta; Tracheophyta; Spermatophyta; Magnoliopsida; eudicotyledons; Gunneridae; Pentapetalae; rosids; malvids; Brassicales; Brassicaceae; Camelineae; Arabidopsis	523	351	420	8424	13281	11891	643	925	1988	9211	6705	5922
Pl01G0000096500.v1	Pl01	9822297	9825119	Pl01G0000096500.1.v1	208-1137[+]	KEGG:osa:4339671`KO:K14497	GO:0005829^cellular_component^cytosol`GO:0005634^cellular_component^nucleus`GO:0004724^molecular_function^magnesium-dependent protein serine/threonine phosphatase activity`GO:0046872^molecular_function^metal ion binding`GO:0004722^molecular_function^protein serine/threonine phosphatase activity`GO:0009738^biological_process^abscisic acid-activated signaling pathway`GO:0009788^biological_process^n…	PF00481.22^PP2C^Protein phosphatase 2C^107-365^E:1.6e-66	GO:0003824^molecular_function^catalytic activity	P2C51_ORYSJ^P2C51_ORYSJ^Q:526-1329,H:78-374^57.047%ID^E:3.13e-85^RecName: Full=Protein phosphatase 2C 51 {ECO:0000305};^Eukaryota; Viridiplantae; Streptophyta; Embryophyta; Tracheophyta; Spermatophyta; Magnoliopsida; Liliopsida; Poales; Poaceae; BOP clade; Oryzoideae; Oryzeae; Oryzinae; Oryza; Oryza sativa	P2C51_ORYSJ^P2C51_ORYSJ^Q:526-1329,H:78-374^57.047%ID^E:3.13e-85^RecName: Full=Protein phosphatase 2C 51 {ECO:0000305};^Eukaryota; Viridiplantae; Streptophyta; Embryophyta; Tracheophyta; Spermatophyta; Magnoliopsida; Liliopsida; Poales; Poaceae; BOP clade; Oryzoideae; Oryzeae; Oryzinae; Oryza; Oryza sativa	2497	2139	2195	4877	7408	5985	3146	4765	11393	25168	18394	18006
Pl01G0000096700.v1	Pl01	9840838	9845205	Pl01G0000096700.1.v1;Pl01G0000096700.2.v1	2220-1857[+];104-825[+]	.;.	GO:0016021^cellular_component^integral component of membrane`GO:0005886^cellular_component^plasma membrane`GO:0005524^molecular_function^ATP binding`GO:0004674^molecular_function^protein serine/threonine kinase activity;GO:0016021^cellular_component^integral component of membrane`GO:0005886^cellular_component^plasma membrane`GO:0005524^molecular_function^ATP binding`GO:0004674^molecular_function^…	PF13947.7^GUB_WAK_bind^Wall-associated receptor kinase galacturonan-binding^34-95^E:1.4e-10`PF07714.18^PK_Tyr_Ser-Thr^Protein tyrosine and serine/threonine kinase^311-577^E:1.2e-42`PF00069.26^Pkinase^Protein kinase domain^312-576^E:1.8e-43;PF13947.7^GUB_WAK_bind^Wall-associated receptor kinase galacturonan-binding^34-95^E:4e-11	GO:0030247^molecular_function^polysaccharide binding`GO:0004672^molecular_function^protein kinase activity`GO:0006468^biological_process^protein phosphorylation`GO:0005524^molecular_function^ATP binding;GO:0030247^molecular_function^polysaccharide binding	LRK10_WHEAT^LRK10_WHEAT^Q:2319-4007,H:34-630^39.638%ID^E:6.53e-124^RecName: Full=Rust resistance kinase Lr10 {ECO:0000312|EMBL:AAC49629.1};^Eukaryota; Viridiplantae; Streptophyta; Embryophyta; Tracheophyta; Spermatophyta; Magnoliopsida; Liliopsida; Poales; Poaceae; BOP clade; Pooideae; Triticodae; Triticeae; Triticinae; Triticum;LRK10_WHEAT^LRK10_WHEAT^Q:928-1323,H:278-409^43.182%ID^E:2.31e-35^Re…	LRK10_WHEAT^LRK10_WHEAT^Q:2319-4007,H:34-630^39.638%ID^E:6.53e-124^RecName: Full=Rust resistance kinase Lr10 {ECO:0000312|EMBL:AAC49629.1};^Eukaryota; Viridiplantae; Streptophyta; Embryophyta; Tracheophyta; Spermatophyta; Magnoliopsida; Liliopsida; Poales; Poaceae; BOP clade; Pooideae; Triticodae; Triticeae; Triticinae; Triticum;LRK10_WHEAT^LRK10_WHEAT^Q:928-1323,H:278-409^43.182%ID^E:2.31e-35^Re…	46	10	28	179	299	312	400	524	1394	394	402	295
Pl01G0000096800.v1	Pl01	9843923	9847218	Pl01G0000096800.1.v1	92-1608[+]	.	GO:0016021^cellular_component^integral component of membrane`GO:0005886^cellular_component^plasma membrane`GO:0005524^molecular_function^ATP binding`GO:0004674^molecular_function^protein serine/threonine kinase activity	PF07714.18^PK_Tyr_Ser-Thr^Protein tyrosine and serine/threonine kinase^232-500^E:7.2e-46`PF00069.26^Pkinase^Protein kinase domain^233-498^E:1.2e-47	GO:0004672^molecular_function^protein kinase activity`GO:0006468^biological_process^protein phosphorylation`GO:0005524^molecular_function^ATP binding	LRK10_WHEAT^LRK10_WHEAT^Q:638-1630,H:289-626^49.408%ID^E:6.79e-103^RecName: Full=Rust resistance kinase Lr10 {ECO:0000312|EMBL:AAC49629.1};^Eukaryota; Viridiplantae; Streptophyta; Embryophyta; Tracheophyta; Spermatophyta; Magnoliopsida; Liliopsida; Poales; Poaceae; BOP clade; Pooideae; Triticodae; Triticeae; Triticinae; Triticum	LRK10_WHEAT^LRK10_WHEAT^Q:638-1630,H:289-626^49.408%ID^E:6.79e-103^RecName: Full=Rust resistance kinase Lr10 {ECO:0000312|EMBL:AAC49629.1};^Eukaryota; Viridiplantae; Streptophyta; Embryophyta; Tracheophyta; Spermatophyta; Magnoliopsida; Liliopsida; Poales; Poaceae; BOP clade; Pooideae; Triticodae; Triticeae; Triticinae; Triticum	0	5	0	76	107	96	223	287	567	324	218	245
Pl01G0000098900.v1	Pl01	10063832	10066970	Pl01G0000098900.1.v1	625-2130[+]	.	.	PF02892.16^zf-BED^BED zinc finger^7-43^E:2.5e-05`PF04937.16^DUF659^Protein of unknown function (DUF 659)^172-324^E:1.2e-56`PF05699.15^Dimer_Tnp_hAT^hAT family C-terminal dimerisation region^549-610^E:3.1e-11	GO:0003677^molecular_function^DNA binding`GO:0046983^molecular_function^protein dimerization activity	.	.	10	0	0	3	5	0	1018	1435	3158	1020	694	610
Pl01G0000101800.v1	Pl01	10498621	10511312	Pl01G0000101800.1.v1;Pl01G0000101800.2.v1	54-2991[+];43-2193[+]	KEGG:ath:AT4G16130`KO:K12446;KEGG:ath:AT4G16130`KO:K12446	GO:0005829^cellular_component^cytosol`GO:0016021^cellular_component^integral component of membrane`GO:0009506^cellular_component^plasmodesma`GO:0005524^molecular_function^ATP binding`GO:0005534^molecular_function^galactose binding`GO:0009702^molecular_function^L-arabinokinase activity`GO:0006012^biological_process^galactose metabolic process;GO:0005829^cellular_component^cytosol`GO:0016021^cellul…	PF13528.7^Glyco_trans_1_3^Glycosyl transferase family 1^21-147^E:8.7e-06`PF10509.10^GalKase_gal_bdg^Galactokinase galactose-binding signature^482-525^E:2.7e-06`PF00288.27^GHMP_kinases_N^GHMP kinases N terminal domain^626-691^E:1.3e-10`PF08544.14^GHMP_kinases_C^GHMP kinases C terminal^864-940^E:0.00019;PF10509.10^GalKase_gal_bdg^Galactokinase galactose-binding signature^216-259^E:1.9e-06`PF00288.2…	GO:0005534^molecular_function^galactose binding`GO:0005524^molecular_function^ATP binding;GO:0005534^molecular_function^galactose binding`GO:0005524^molecular_function^ATP binding	ARAK_ARATH^ARAK_ARATH^Q:51-2984,H:50-1038^77.699%ID^E:0^RecName: Full=L-arabinokinase;^Eukaryota; Viridiplantae; Streptophyta; Embryophyta; Tracheophyta; Spermatophyta; Magnoliopsida; eudicotyledons; Gunneridae; Pentapetalae; rosids; malvids; Brassicales; Brassicaceae; Camelineae; Arabidopsis;ARAK_ARATH^ARAK_ARATH^Q:1-2175,H:302-1038^74.526%ID^E:0^RecName: Full=L-arabinokinase;^Eukaryota; Viridip…	ARAK_ARATH^ARAK_ARATH^Q:51-2984,H:50-1038^77.699%ID^E:0^RecName: Full=L-arabinokinase;^Eukaryota; Viridiplantae; Streptophyta; Embryophyta; Tracheophyta; Spermatophyta; Magnoliopsida; eudicotyledons; Gunneridae; Pentapetalae; rosids; malvids; Brassicales; Brassicaceae; Camelineae; Arabidopsis;ARAK_ARATH^ARAK_ARATH^Q:1-2175,H:302-1038^74.526%ID^E:0^RecName: Full=L-arabinokinase;^Eukaryota; Viridip…	799	604	647	2846	4363	4093	1716	3219	6476	2944	2095	1929
Pl01G0000103700.v1	Pl01	10841857	10843678	Pl01G0000103700.1.v1;Pl01G0000103700.2.v1	187-462[+];189-450[+]	.;.	.;.	.;.	.;.	.;.	.;.	0	0	0	0	0	0	230	350	728	69	49	56
Pl01G0000106600.v1	Pl01	11207953	11208354	Pl01G0000106600.1.v1	23-219[+]	.	.	.	.	.	.	10	0	14	7	23	5	26	94	133	128	154	107
Pl01G0000107200.v1	Pl01	11271211	11272403	Pl01G0000107200.1.v1	497-402[+]	.	.	.	.	.	.	26	39	42	39	121	90	366	372	885	508	415	559
Pl01G0000107800.v1	Pl01	11352599	11353015	Pl01G0000107800.1.v1	1-153[+]	KEGG:ath:AT5G20090`KO:K22138	GO:0031305^cellular_component^integral component of mitochondrial inner membrane`GO:0005739^cellular_component^mitochondrion`GO:0005886^cellular_component^plasma membrane`GO:0009536^cellular_component^plastid`GO:0005774^cellular_component^vacuolar membrane`GO:0050833^molecular_function^pyruvate transmembrane transporter activity`GO:0006850^biological_process^mitochondrial pyruvate transmembrane t…	PF03650.14^MPC^Mitochondrial pyruvate carriers^4-48^E:4.8e-17	GO:0006850^biological_process^mitochondrial pyruvate transmembrane transport`GO:0005743^cellular_component^mitochondrial inner membrane	MPC1_ARATH^MPC1_ARATH^Q:10-150,H:6-52^53.191%ID^E:3.02e-11^RecName: Full=Mitochondrial pyruvate carrier 1 {ECO:0000305};^Eukaryota; Viridiplantae; Streptophyta; Embryophyta; Tracheophyta; Spermatophyta; Magnoliopsida; eudicotyledons; Gunneridae; Pentapetalae; rosids; malvids; Brassicales; Brassicaceae; Camelineae; Arabidopsis	MPC1_ARATH^MPC1_ARATH^Q:10-150,H:6-52^53.191%ID^E:3.02e-11^RecName: Full=Mitochondrial pyruvate carrier 1 {ECO:0000305};^Eukaryota; Viridiplantae; Streptophyta; Embryophyta; Tracheophyta; Spermatophyta; Magnoliopsida; eudicotyledons; Gunneridae; Pentapetalae; rosids; malvids; Brassicales; Brassicaceae; Camelineae; Arabidopsis	0	0	0	1181	1616	1424	1199	1973	4134	1601	1220	1049
Pl01G0000107900.v1	Pl01	11357076	11357144	Pl01G0000107900.2.v1	1-69[+]	.	.	.	.	.	.	13	24	22	16	43	32	138	131	283	189	171	214
Pl01G0000108200.v1	Pl01	11403754	11406436	Pl01G0000108200.2.v1	1-837[+]	KEGG:ath:AT3G26720`KO:K01191	GO:0099503^cellular_component^secretory vesicle`GO:0005774^cellular_component^vacuolar membrane`GO:0005773^cellular_component^vacuole`GO:0004559^molecular_function^alpha-mannosidase activity`GO:0030246^molecular_function^carbohydrate binding`GO:0046872^molecular_function^metal ion binding`GO:0006013^biological_process^mannose metabolic process`GO:0006517^biological_process^protein deglycosylation	PF01074.23^Glyco_hydro_38N^Glycosyl hydrolases family 38 N-terminal domain^37-272^E:2.3e-78	GO:0004559^molecular_function^alpha-mannosidase activity`GO:0006013^biological_process^mannose metabolic process	MANA1_ARATH^MANA1_ARATH^Q:58-825,H:22-277^91.016%ID^E:1.8e-166^RecName: Full=Alpha-mannosidase At3g26720 {ECO:0000305};^Eukaryota; Viridiplantae; Streptophyta; Embryophyta; Tracheophyta; Spermatophyta; Magnoliopsida; eudicotyledons; Gunneridae; Pentapetalae; rosids; malvids; Brassicales; Brassicaceae; Camelineae; Arabidopsis	MANA1_ARATH^MANA1_ARATH^Q:58-825,H:22-277^91.016%ID^E:1.8e-166^RecName: Full=Alpha-mannosidase At3g26720 {ECO:0000305};^Eukaryota; Viridiplantae; Streptophyta; Embryophyta; Tracheophyta; Spermatophyta; Magnoliopsida; eudicotyledons; Gunneridae; Pentapetalae; rosids; malvids; Brassicales; Brassicaceae; Camelineae; Arabidopsis	99	104	90	64	145	144	31	14	63	33	12	10
Pl01G0000108300.v1	Pl01	11426933	11427268	Pl01G0000108300.1.v1	1-303[+]	.	.	.	.	.	.	0	0	0	0	0	0	16	24	66	46	33	29
Pl01G0000109700.v1	Pl01	11645062	11645949	Pl01G0000109700.1.v1	1-888[+]	KEGG:bta:510305	GO:0016021^cellular_component^integral component of membrane	PF04819.13^DUF716^Family of unknown function (DUF716)^117-258^E:3.8e-46	.	TM45B_BOVIN^TM45B_BOVIN^Q:1-678,H:1-219^25.322%ID^E:1.7e-10^RecName: Full=Transmembrane protein 45B;^Eukaryota; Metazoa; Chordata; Craniata; Vertebrata; Euteleostomi; Mammalia; Eutheria; Laurasiatheria; Artiodactyla; Ruminantia; Pecora; Bovidae; Bovinae; Bos	TM45B_BOVIN^TM45B_BOVIN^Q:1-678,H:1-219^25.322%ID^E:1.7e-10^RecName: Full=Transmembrane protein 45B;^Eukaryota; Metazoa; Chordata; Craniata; Vertebrata; Euteleostomi; Mammalia; Eutheria; Laurasiatheria; Artiodactyla; Ruminantia; Pecora; Bovidae; Bovinae; Bos	3	1	1	314	348	346	165	270	584	266	165	158
Pl01G0000110000.v1	Pl01	11709352	11710300	Pl01G0000110000.1.v1	268-315[+]	.	.	.	.	.	.	773	563	719	193	304	266	619	902	2023	76	76	34
Pl01G0000111200.v1	Pl01	11813890	11818279	Pl01G0000111200.1.v1	385-1062[+]	KEGG:ath:AT3G26790	GO:0005634^cellular_component^nucleus`GO:0003677^molecular_function^DNA binding`GO:0003700^molecular_function^DNA-binding transcription factor activity`GO:0019900^molecular_function^kinase binding`GO:0009793^biological_process^embryo development ending in seed dormancy`GO:0010373^biological_process^negative regulation of gibberellin biosynthetic process`GO:0099402^biological_process^plant organ d…	PF02362.22^B3^B3 DNA binding domain^164-264^E:5.5e-16	GO:0003677^molecular_function^DNA binding	FUS3_ARATH^FUS3_ARATH^Q:559-1443,H:23-313^48.171%ID^E:1.52e-74^RecName: Full=B3 domain-containing transcription factor FUS3;^Eukaryota; Viridiplantae; Streptophyta; Embryophyta; Tracheophyta; Spermatophyta; Magnoliopsida; eudicotyledons; Gunneridae; Pentapetalae; rosids; malvids; Brassicales; Brassicaceae; Camelineae; Arabidopsis	FUS3_ARATH^FUS3_ARATH^Q:559-1443,H:23-313^48.171%ID^E:1.52e-74^RecName: Full=B3 domain-containing transcription factor FUS3;^Eukaryota; Viridiplantae; Streptophyta; Embryophyta; Tracheophyta; Spermatophyta; Magnoliopsida; eudicotyledons; Gunneridae; Pentapetalae; rosids; malvids; Brassicales; Brassicaceae; Camelineae; Arabidopsis	0	6	0	68	148	220	61	50	213	1487	756	770
Pl01G0000111600.v1	Pl01	11867106	11869282	Pl01G0000111600.1.v1	171-864[+]	KEGG:ath:AT5G13200	GO:0009536^cellular_component^plastid`GO:0009793^biological_process^embryo development ending in seed dormancy`GO:0098755^biological_process^maintenance of seed dormancy by absisic acid`GO:0010029^biological_process^regulation of seed germination`GO:0009845^biological_process^seed germination	PF02893.21^GRAM^GRAM domain^150-259^E:7.2e-20	.	GEML5_ARATH^GEML5_ARATH^Q:279-971,H:37-263^61.638%ID^E:9.25e-95^RecName: Full=GEM-like protein 5;^Eukaryota; Viridiplantae; Streptophyta; Embryophyta; Tracheophyta; Spermatophyta; Magnoliopsida; eudicotyledons; Gunneridae; Pentapetalae; rosids; malvids; Brassicales; Brassicaceae; Camelineae; Arabidopsis	GEML5_ARATH^GEML5_ARATH^Q:279-971,H:37-263^61.638%ID^E:9.25e-95^RecName: Full=GEM-like protein 5;^Eukaryota; Viridiplantae; Streptophyta; Embryophyta; Tracheophyta; Spermatophyta; Magnoliopsida; eudicotyledons; Gunneridae; Pentapetalae; rosids; malvids; Brassicales; Brassicaceae; Camelineae; Arabidopsis	124	96	83	548	946	697	733	1275	2670	1591	1173	1087
Pl01G0000112800.v1	Pl01	11971282	11973956	Pl01G0000112800.1.v1	1-1263[+]	KEGG:cel:CELE_B0507.2	.	.	.	BROX_CAEEL^BROX_CAEEL^Q:109-852,H:20-266^27.239%ID^E:1.15e-07^RecName: Full=BRO1 domain-containing protein BROX homolog;^Eukaryota; Metazoa; Ecdysozoa; Nematoda; Chromadorea; Rhabditida; Rhabditina; Rhabditomorpha; Rhabditoidea; Rhabditidae; Peloderinae; Caenorhabditis	BROX_CAEEL^BROX_CAEEL^Q:109-852,H:20-266^27.239%ID^E:1.15e-07^RecName: Full=BRO1 domain-containing protein BROX homolog;^Eukaryota; Metazoa; Ecdysozoa; Nematoda; Chromadorea; Rhabditida; Rhabditina; Rhabditomorpha; Rhabditoidea; Rhabditidae; Peloderinae; Caenorhabditis	100	73	91	459	629	549	397	742	1438	2115	1689	1603
Pl01G0000113000.v1	Pl01	12004732	12006965	Pl01G0000113000.1.v1	326-531[+]	KEGG:pop:7484872	GO:0016021^cellular_component^integral component of membrane`GO:0005886^cellular_component^plasma membrane`GO:0051539^molecular_function^4 iron, 4 sulfur cluster binding	PF04535.13^DUF588^Domain of unknown function (DUF588)^3-142^E:6.5e-32	.	CSPL3_POPTR^CSPL3_POPTR^Q:272-787,H:4-176^41.618%ID^E:3.9e-36^RecName: Full=CASP-like protein 1F2;^Eukaryota; Viridiplantae; Streptophyta; Embryophyta; Tracheophyta; Spermatophyta; Magnoliopsida; eudicotyledons; Gunneridae; Pentapetalae; rosids; fabids; Malpighiales; Salicaceae; Saliceae; Populus	CSPL3_POPTR^CSPL3_POPTR^Q:272-787,H:4-176^41.618%ID^E:3.9e-36^RecName: Full=CASP-like protein 1F2;^Eukaryota; Viridiplantae; Streptophyta; Embryophyta; Tracheophyta; Spermatophyta; Magnoliopsida; eudicotyledons; Gunneridae; Pentapetalae; rosids; fabids; Malpighiales; Salicaceae; Saliceae; Populus	238	160	140	1271	1774	1853	863	1563	3125	2718	1934	1902
Pl01G0000115100.v1	Pl01	12264724	12266948	Pl01G0000115100.1.v1	26-582[+]	KEGG:ath:AT5G13080	GO:0005634^cellular_component^nucleus`GO:0003700^molecular_function^DNA-binding transcription factor activity`GO:0000978^molecular_function^RNA polymerase II cis-regulatory region sequence-specific DNA binding`GO:0010055^biological_process^atrichoblast differentiation`GO:0048527^biological_process^lateral root development`GO:0000122^biological_process^negative regulation of transcription by RNA p…	PF03106.16^WRKY^WRKY DNA -binding domain^115-172^E:1.8e-26	GO:0003700^molecular_function^DNA-binding transcription factor activity`GO:0043565^molecular_function^sequence-specific DNA binding`GO:0006355^biological_process^regulation of transcription, DNA-templated	WRK75_ARATH^WRK75_ARATH^Q:329-598,H:54-143^88.889%ID^E:2.85e-53^RecName: Full=Probable WRKY transcription factor 75;^Eukaryota; Viridiplantae; Streptophyta; Embryophyta; Tracheophyta; Spermatophyta; Magnoliopsida; eudicotyledons; Gunneridae; Pentapetalae; rosids; malvids; Brassicales; Brassicaceae; Camelineae; Arabidopsis	WRK75_ARATH^WRK75_ARATH^Q:329-598,H:54-143^88.889%ID^E:2.85e-53^RecName: Full=Probable WRKY transcription factor 75;^Eukaryota; Viridiplantae; Streptophyta; Embryophyta; Tracheophyta; Spermatophyta; Magnoliopsida; eudicotyledons; Gunneridae; Pentapetalae; rosids; malvids; Brassicales; Brassicaceae; Camelineae; Arabidopsis	59	34	19	1078	1581	1329	1139	1669	4187	1357	903	901
Pl01G0000115600.v1	Pl01	12352582	12353822	Pl01G0000115600.1.v1	367-222[+]	.	.	.	.	.	.	23	34	32	71	143	96	152	201	551	162	141	106
Pl01G0000116600.v1	Pl01	12434476	12435470	Pl01G0000116600.1.v1;Pl01G0000116600.2.v1	594-243[+];127-162[+]	.;.	.;.	.;.	.;.	.;.	.;.	333	288	281	161	269	273	38	89	160	112	74	52
Pl01G0000116700.v1	Pl01	12494058	12495818	Pl01G0000116700.1.v1	628-939[+]	KEGG:ath:AT3G27010	GO:0005634^cellular_component^nucleus`GO:0000987^molecular_function^cis-regulatory region sequence-specific DNA binding`GO:0003677^molecular_function^DNA binding`GO:0003700^molecular_function^DNA-binding transcription factor activity`GO:0043565^molecular_function^sequence-specific DNA binding`GO:0009653^biological_process^anatomical structure morphogenesis`GO:1900056^biological_process^negative r…	PF03634.14^TCP^TCP family transcription factor^72-165^E:1.3e-30	.	TCP20_ARATH^TCP20_ARATH^Q:628-1470,H:1-274^55.973%ID^E:4.36e-78^RecName: Full=Transcription factor TCP20;^Eukaryota; Viridiplantae; Streptophyta; Embryophyta; Tracheophyta; Spermatophyta; Magnoliopsida; eudicotyledons; Gunneridae; Pentapetalae; rosids; malvids; Brassicales; Brassicaceae; Camelineae; Arabidopsis	TCP20_ARATH^TCP20_ARATH^Q:628-1470,H:1-274^55.973%ID^E:4.36e-78^RecName: Full=Transcription factor TCP20;^Eukaryota; Viridiplantae; Streptophyta; Embryophyta; Tracheophyta; Spermatophyta; Magnoliopsida; eudicotyledons; Gunneridae; Pentapetalae; rosids; malvids; Brassicales; Brassicaceae; Camelineae; Arabidopsis	964	796	852	2255	3331	2684	1229	2077	4997	10358	7125	7167
Pl01G0000117200.v1	Pl01	12573401	12578094	Pl01G0000117200.1.v1	267-1338[+]	KEGG:ath:AT3G01990	GO:0016597^molecular_function^amino acid binding	PF01842.26^ACT^ACT domain^117-166^E:3.8e-09`PF13740.7^ACT_6^ACT domain^117-163^E:1.1e-06	.	ACR6_ARATH^ACR6_ARATH^Q:270-1565,H:3-433^68.636%ID^E:0^RecName: Full=ACT domain-containing protein ACR6 {ECO:0000305};^Eukaryota; Viridiplantae; Streptophyta; Embryophyta; Tracheophyta; Spermatophyta; Magnoliopsida; eudicotyledons; Gunneridae; Pentapetalae; rosids; malvids; Brassicales; Brassicaceae; Camelineae; Arabidopsis	ACR6_ARATH^ACR6_ARATH^Q:270-1565,H:3-433^68.636%ID^E:0^RecName: Full=ACT domain-containing protein ACR6 {ECO:0000305};^Eukaryota; Viridiplantae; Streptophyta; Embryophyta; Tracheophyta; Spermatophyta; Magnoliopsida; eudicotyledons; Gunneridae; Pentapetalae; rosids; malvids; Brassicales; Brassicaceae; Camelineae; Arabidopsis	234	140	148	737	1281	1070	715	1033	2515	1873	1386	1290
Pl01G0000119200.v1	Pl01	12830995	12831653	Pl01G0000119200.1.v1	1-561[+]	.	.	PF04434.18^SWIM^SWIM zinc finger^27-56^E:5.2e-07	GO:0008270^molecular_function^zinc ion binding	.	.	0	0	0	0	0	0	18	27	27	15	22	10
Pl01G0000119700.v1	Pl01	12864335	12866140	Pl01G0000119700.1.v1	445-522[+]	.	.	PF01190.18^Pollen_Ole_e_1^Pollen protein Ole e 1 like^39-137^E:9.8e-22	.	.	.	2126	1783	1660	368	485	426	1526	2507	5650	1234	748	776
Pl01G0000119800.v1	Pl01	12873304	12875398	Pl01G0000119800.1.v1	1-1995[+]	.	GO:0005737^cellular_component^cytoplasm`GO:0005634^cellular_component^nucleus`GO:0042803^molecular_function^protein homodimerization activity`GO:0036377^biological_process^arbuscular mycorrhizal association`GO:0006355^biological_process^regulation of transcription, DNA-templated`GO:0009610^biological_process^response to symbiotic fungus	PF03514.15^GRAS^GRAS domain family^305-663^E:4.1e-130	.	RAM1_LOTJA^RAM1_LOTJA^Q:1-1992,H:1-693^81.402%ID^E:0^RecName: Full=GRAS family protein RAM1 {ECO:0000305};^Eukaryota; Viridiplantae; Streptophyta; Embryophyta; Tracheophyta; Spermatophyta; Magnoliopsida; eudicotyledons; Gunneridae; Pentapetalae; rosids; fabids; Fabales; Fabaceae; Papilionoideae; 50 kb inversion clade; NPAAA clade; Hologalegina; robinioid clade; Loteae; Lotus	RAM1_LOTJA^RAM1_LOTJA^Q:1-1992,H:1-693^81.402%ID^E:0^RecName: Full=GRAS family protein RAM1 {ECO:0000305};^Eukaryota; Viridiplantae; Streptophyta; Embryophyta; Tracheophyta; Spermatophyta; Magnoliopsida; eudicotyledons; Gunneridae; Pentapetalae; rosids; fabids; Fabales; Fabaceae; Papilionoideae; 50 kb inversion clade; NPAAA clade; Hologalegina; robinioid clade; Loteae; Lotus	186	144	96	10	43	31	93	146	399	29	29	10
Pl01G0000120600.v1	Pl01	12994487	12994834	Pl01G0000120600.1.v1	1-228[+]	.	.	.	.	.	.	0	0	0	0	0	1	75	53	144	53	48	74
Pl01G0000120900.v1	Pl01	13072051	13073634	Pl01G0000120900.1.v1	104-1338[+]	KEGG:ath:AT1G77405	.	PF13041.7^PPR_2^PPR repeat family^162-208^E:5.3e-09`PF01535.21^PPR^PPR repeat^164-193^E:0.017`PF13812.7^PPR_3^Pentatricopeptide repeat domain^166-206^E:0.00037`PF12854.8^PPR_1^PPR repeat^192-224^E:3.6e-07`PF13041.7^PPR_2^PPR repeat family^195-246^E:5.2e-11`PF01535.21^PPR^PPR repeat^199-224^E:0.00024`PF12854.8^PPR_1^PPR repeat^229-248^E:4.3e-07`PF01535.21^PPR^PPR repeat^235-251^E:0.017`PF13041.7^P…	.	PP130_ARATH^PP130_ARATH^Q:131-1411,H:8-437^58.756%ID^E:0^RecName: Full=Pentatricopeptide repeat-containing protein At1g77405;^Eukaryota; Viridiplantae; Streptophyta; Embryophyta; Tracheophyta; Spermatophyta; Magnoliopsida; eudicotyledons; Gunneridae; Pentapetalae; rosids; malvids; Brassicales; Brassicaceae; Camelineae; Arabidopsis	PP130_ARATH^PP130_ARATH^Q:131-1411,H:8-437^58.756%ID^E:0^RecName: Full=Pentatricopeptide repeat-containing protein At1g77405;^Eukaryota; Viridiplantae; Streptophyta; Embryophyta; Tracheophyta; Spermatophyta; Magnoliopsida; eudicotyledons; Gunneridae; Pentapetalae; rosids; malvids; Brassicales; Brassicaceae; Camelineae; Arabidopsis	42	40	42	0	5	5	101	186	350	210	146	144
Pl01G0000124300.v1	Pl01	13436569	13438736	Pl01G0000124300.1.v1	1-1323[+]	KEGG:ath:AT3G02040`KO:K18696	GO:0009507^cellular_component^chloroplast`GO:0009536^cellular_component^plastid`GO:0008889^molecular_function^glycerophosphodiester phosphodiesterase activity`GO:0000287^molecular_function^magnesium ion binding`GO:0030643^biological_process^cellular phosphate ion homeostasis`GO:0071456^biological_process^cellular response to hypoxia`GO:0006071^biological_process^glycerol metabolic process`GO:0046…	PF03009.18^GDPD^Glycerophosphoryl diester phosphodiesterase family^110-385^E:6.8e-49	GO:0008081^molecular_function^phosphoric diester hydrolase activity`GO:0006629^biological_process^lipid metabolic process	GDPD1_ARATH^GDPD1_ARATH^Q:178-1287,H:1-350^62.903%ID^E:8.78e-163^RecName: Full=Glycerophosphodiester phosphodiesterase GDPD1, chloroplastic {ECO:0000305};^Eukaryota; Viridiplantae; Streptophyta; Embryophyta; Tracheophyta; Spermatophyta; Magnoliopsida; eudicotyledons; Gunneridae; Pentapetalae; rosids; malvids; Brassicales; Brassicaceae; Camelineae; Arabidopsis	GDPD1_ARATH^GDPD1_ARATH^Q:178-1287,H:1-350^62.903%ID^E:8.78e-163^RecName: Full=Glycerophosphodiester phosphodiesterase GDPD1, chloroplastic {ECO:0000305};^Eukaryota; Viridiplantae; Streptophyta; Embryophyta; Tracheophyta; Spermatophyta; Magnoliopsida; eudicotyledons; Gunneridae; Pentapetalae; rosids; malvids; Brassicales; Brassicaceae; Camelineae; Arabidopsis	4978	3501	4266	3604	5259	4645	22034	31850	77137	13850	8276	8940
Pl01G0000131600.v1	Pl01	14273433	14275553	Pl01G0000131600.1.v1	474-144[+]	.	.	.	.	.	.	0	0	0	110	151	122	24	22	90	244	186	149
Pl01G0000135900.v1	Pl01	15057452	15060199	Pl01G0000135900.1.v1	53-987[+]	KEGG:ath:AT5G14130`KO:K00430	GO:0005576^cellular_component^extracellular region`GO:0020037^molecular_function^heme binding`GO:0046872^molecular_function^metal ion binding`GO:0004601^molecular_function^peroxidase activity`GO:0042744^biological_process^hydrogen peroxide catabolic process`GO:0006979^biological_process^response to oxidative stress	PF00141.24^peroxidase^Peroxidase^45-291^E:6.6e-73	GO:0004601^molecular_function^peroxidase activity`GO:0020037^molecular_function^heme binding`GO:0006979^biological_process^response to oxidative stress`GO:0055114^biological_process^oxidation-reduction process	PER55_ARATH^PER55_ARATH^Q:77-1033,H:12-330^63.863%ID^E:5.54e-137^RecName: Full=Peroxidase 55;^Eukaryota; Viridiplantae; Streptophyta; Embryophyta; Tracheophyta; Spermatophyta; Magnoliopsida; eudicotyledons; Gunneridae; Pentapetalae; rosids; malvids; Brassicales; Brassicaceae; Camelineae; Arabidopsis	PER55_ARATH^PER55_ARATH^Q:77-1033,H:12-330^63.863%ID^E:5.54e-137^RecName: Full=Peroxidase 55;^Eukaryota; Viridiplantae; Streptophyta; Embryophyta; Tracheophyta; Spermatophyta; Magnoliopsida; eudicotyledons; Gunneridae; Pentapetalae; rosids; malvids; Brassicales; Brassicaceae; Camelineae; Arabidopsis	5	4	22	712	1011	901	99	181	359	3279	2112	1678
Pl01G0000136300.v1	Pl01	15094037	15094711	Pl01G0000136300.1.v1	223-282[+]	.	.	.	.	.	.	18	15	13	45	73	43	0	0	0	0	0	0
Pl01G0000138800.v1	Pl01	15447735	15450402	Pl01G0000138800.1.v1	1-2445[+]	.	GO:0005737^cellular_component^cytoplasm`GO:0005634^cellular_component^nucleus`GO:0043531^molecular_function^ADP binding`GO:0050135^molecular_function^NAD(P)+ nucleosidase activity`GO:0003953^molecular_function^NAD+ nucleosidase activity`GO:0061809^molecular_function^NAD+ nucleotidase, cyclic ADP-ribose generating`GO:0009817^biological_process^defense response to fungus, incompatible interaction`G…	PF00931.23^NB-ARC^NB-ARC domain^2-127^E:3.4e-18`PF07725.13^LRR_3^Leucine Rich Repeat^321-340^E:3.5e-07`PF13516.7^LRR_6^Leucine Rich repeat^392-404^E:690`PF13516.7^LRR_6^Leucine Rich repeat^409-421^E:3200`PF13516.7^LRR_6^Leucine Rich repeat^434-444^E:1900`PF13516.7^LRR_6^Leucine Rich repeat^454-468^E:82`PF13516.7^LRR_6^Leucine Rich repeat^472-479^E:11000`PF13516.7^LRR_6^Leucine Rich repeat^497-509…	GO:0043531^molecular_function^ADP binding`GO:0005515^molecular_function^protein binding	RUN1_VITRO^RUN1_VITRO^Q:10-1797,H:302-930^38.522%ID^E:9.44e-104^RecName: Full=Disease resistance protein RUN1 {ECO:0000305};^Eukaryota; Viridiplantae; Streptophyta; Embryophyta; Tracheophyta; Spermatophyta; Magnoliopsida; eudicotyledons; Gunneridae; Pentapetalae; rosids; Vitales; Vitaceae; Viteae; Vitis`RUN1_VITRO^RUN1_VITRO^Q:958-1719,H:757-1043^30.241%ID^E:1.44e-11^RecName: Full=Disease resista…	RUN1_VITRO^RUN1_VITRO^Q:10-1797,H:302-930^38.522%ID^E:9.44e-104^RecName: Full=Disease resistance protein RUN1 {ECO:0000305};^Eukaryota; Viridiplantae; Streptophyta; Embryophyta; Tracheophyta; Spermatophyta; Magnoliopsida; eudicotyledons; Gunneridae; Pentapetalae; rosids; Vitales; Vitaceae; Viteae; Vitis`RUN1_VITRO^RUN1_VITRO^Q:958-1719,H:757-1043^30.241%ID^E:1.44e-11^RecName: Full=Disease resista…	12	9	0	18	39	26	120	208	487	385	244	233
Pl01G0000139500.v1	Pl01	15565014	15569581	Pl01G0000139500.1.v1;Pl01G0000139500.2.v1;Pl01G0000139500.3.v1	226-756[+];226-1005[+];21-459[+]	KEGG:mac:MA_2111`KO:K03799;KEGG:mma:MM_3134`KO:K03799;KEGG:mac:MA_2111`KO:K03799	GO:0016021^cellular_component^integral component of membrane`GO:0005886^cellular_component^plasma membrane`GO:0004222^molecular_function^metalloendopeptidase activity`GO:0008270^molecular_function^zinc ion binding;GO:0016021^cellular_component^integral component of membrane`GO:0005886^cellular_component^plasma membrane`GO:0004222^molecular_function^metalloendopeptidase activity`GO:0008270^molecul…	PF01435.19^Peptidase_M48^Peptidase family M48^122-244^E:9.4e-15;PF01435.19^Peptidase_M48^Peptidase family M48^122-311^E:6.4e-19;PF01435.19^Peptidase_M48^Peptidase family M48^22-146^E:2e-15	GO:0004222^molecular_function^metalloendopeptidase activity`GO:0006508^biological_process^proteolysis;GO:0004222^molecular_function^metalloendopeptidase activity`GO:0006508^biological_process^proteolysis;GO:0004222^molecular_function^metalloendopeptidase activity`GO:0006508^biological_process^proteolysis	HTPX2_METAC^HTPX2_METAC^Q:523-843,H:61-166^32.71%ID^E:2.66e-09^RecName: Full=Protease HtpX homolog 2 {ECO:0000255|HAMAP-Rule:MF_00188};^Archaea; Euryarchaeota; Stenosarchaea group; Methanomicrobia; Methanosarcinales; Methanosarcinaceae; Methanosarcina;HTPX2_METMA^HTPX2_METMA^Q:523-990,H:61-239^27.778%ID^E:1.19e-09^RecName: Full=Protease HtpX homolog 2 {ECO:0000255|HAMAP-Rule:MF_00188};^Archaea; E…	HTPX2_METAC^HTPX2_METAC^Q:523-843,H:61-166^32.71%ID^E:2.66e-09^RecName: Full=Protease HtpX homolog 2 {ECO:0000255|HAMAP-Rule:MF_00188};^Archaea; Euryarchaeota; Stenosarchaea group; Methanomicrobia; Methanosarcinales; Methanosarcinaceae; Methanosarcina;HTPX2_METMA^HTPX2_METMA^Q:523-990,H:61-239^27.778%ID^E:1.19e-09^RecName: Full=Protease HtpX homolog 2 {ECO:0000255|HAMAP-Rule:MF_00188};^Archaea; E…	271	223	225	1004	1310	1293	627	930	1817	1478	1099	1034
Pl01G0000142800.v1	Pl01	16129413	16129935	Pl01G0000142800.1.v1	30-297[+]	.	.	.	.	.	.	0	0	0	0	0	0	36	61	84	67	49	61
Pl01G0000142900.v1	Pl01	16131420	16132021	Pl01G0000142900.1.v1	103-282[+]	.	.	.	.	.	.	3	0	0	0	0	0	367	688	1571	800	590	686
Pl01G0000144300.v1	Pl01	16286764	16293253	Pl01G0000144300.1.v1;Pl01G0000144300.2.v1;Pl01G0000144300.3.v1;Pl01G0000144300.4.v1;Pl01G0000144300.5.v1;Pl01G0000144300.6.v1	672-2376[+];755-2202[+];254-1122[+];42-2325[+];1056-1290[+];383-790[+]	KEGG:ath:AT3G27170`KO:K05016;KEGG:ath:AT3G27170`KO:K05016;KEGG:ath:AT5G40890`KO:K05016;KEGG:ath:AT3G27170`KO:K05016;KEGG:ath:AT3G27170`KO:K05016;KEGG:ath:AT3G27170`KO:K05016	GO:0034707^cellular_component^chloride channel complex`GO:0043231^cellular_component^intracellular membrane-bounded organelle`GO:0009705^cellular_component^plant-type vacuole membrane`GO:0015112^molecular_function^nitrate transmembrane transporter activity`GO:0009671^molecular_function^nitrate:proton symporter activity`GO:0022857^molecular_function^transmembrane transporter activity`GO:0005247^mo…	PF00654.21^Voltage_CLC^Voltage gated chloride channel^148-564^E:6.7e-92`PF00571.29^CBS^CBS domain^720-770^E:0.00022;PF00654.21^Voltage_CLC^Voltage gated chloride channel^90-506^E:6.8e-92`PF00571.29^CBS^CBS domain^662-712^E:0.0002;PF00654.21^Voltage_CLC^Voltage gated chloride channel^148-368^E:7.5e-58;PF00654.21^Voltage_CLC^Voltage gated chloride channel^131-547^E:6.4e-92`PF00571.29^CBS^CBS domain…	GO:0005247^molecular_function^voltage-gated chloride channel activity`GO:0006821^biological_process^chloride transport`GO:0055085^biological_process^transmembrane transport`GO:0016020^cellular_component^membrane;GO:0005247^molecular_function^voltage-gated chloride channel activity`GO:0006821^biological_process^chloride transport`GO:0055085^biological_process^transmembrane transport`GO:0016020^cel…	CLCB_ARATH^CLCB_ARATH^Q:678-3026,H:4-775^79.183%ID^E:0^RecName: Full=Chloride channel protein CLC-b;^Eukaryota; Viridiplantae; Streptophyta; Embryophyta; Tracheophyta; Spermatophyta; Magnoliopsida; eudicotyledons; Gunneridae; Pentapetalae; rosids; malvids; Brassicales; Brassicaceae; Camelineae; Arabidopsis;CLCB_ARATH^CLCB_ARATH^Q:761-2935,H:54-775^80.552%ID^E:0^RecName: Full=Chloride channel prot…	CLCB_ARATH^CLCB_ARATH^Q:678-3026,H:4-775^79.183%ID^E:0^RecName: Full=Chloride channel protein CLC-b;^Eukaryota; Viridiplantae; Streptophyta; Embryophyta; Tracheophyta; Spermatophyta; Magnoliopsida; eudicotyledons; Gunneridae; Pentapetalae; rosids; malvids; Brassicales; Brassicaceae; Camelineae; Arabidopsis;CLCB_ARATH^CLCB_ARATH^Q:761-2935,H:54-775^80.552%ID^E:0^RecName: Full=Chloride channel prot…	215	204	199	4446	6488	5659	4115	6068	12671	11040	7754	7284
Pl01G0000144400.v1	Pl01	16291722	16308589	Pl01G0000144400.1.v1	163-1539[+]	KEGG:pcu:pc1998`KO:K03215	GO:0051539^molecular_function^4 iron, 4 sulfur cluster binding`GO:0046872^molecular_function^metal ion binding`GO:0008173^molecular_function^RNA methyltransferase activity`GO:0006396^biological_process^RNA processing	PF05175.15^MTS^Methyltransferase small domain^285-380^E:5.3e-06`PF03602.16^Cons_hypoth95^Conserved hypothetical protein 95^290-415^E:4.2e-06	GO:0008168^molecular_function^methyltransferase activity	Y1998_PARUW^Y1998_PARUW^Q:316-1632,H:12-381^34.852%ID^E:2.56e-78^RecName: Full=Uncharacterized RNA methyltransferase pc1998;^Bacteria; Chlamydiae; Parachlamydiales; Parachlamydiaceae; Candidatus Protochlamydia	Y1998_PARUW^Y1998_PARUW^Q:316-1632,H:12-381^34.852%ID^E:2.56e-78^RecName: Full=Uncharacterized RNA methyltransferase pc1998;^Bacteria; Chlamydiae; Parachlamydiales; Parachlamydiaceae; Candidatus Protochlamydia	15	8	7	10	29	46	207	538	1074	330	243	133
Pl01G0000144600.v1	Pl01	16313542	16315124	Pl01G0000144600.1.v1	68-369[+]	.	.	.	.	.	.	645	570	642	537	795	686	19	29	37	17	19	0
Pl01G0000144800.v1	Pl01	16359489	16365093	Pl01G0000144800.1.v1	497-1218[+]	KEGG:ath:AT5G14180	GO:0005576^cellular_component^extracellular region`GO:0016298^molecular_function^lipase activity`GO:0004806^molecular_function^triglyceride lipase activity`GO:0002213^biological_process^defense response to insect`GO:0016042^biological_process^lipid catabolic process	PF04083.17^Abhydro_lipase^Partial alpha/beta-hydrolase lipase region^43-100^E:2.3e-18`PF00561.21^Abhydrolase_1^alpha/beta hydrolase fold^83-237^E:1.5e-11	GO:0006629^biological_process^lipid metabolic process	LIP2_ARATH^LIP2_ARATH^Q:512-1702,H:15-417^61.042%ID^E:0^RecName: Full=Triacylglycerol lipase 2;^Eukaryota; Viridiplantae; Streptophyta; Embryophyta; Tracheophyta; Spermatophyta; Magnoliopsida; eudicotyledons; Gunneridae; Pentapetalae; rosids; malvids; Brassicales; Brassicaceae; Camelineae; Arabidopsis	LIP2_ARATH^LIP2_ARATH^Q:512-1702,H:15-417^61.042%ID^E:0^RecName: Full=Triacylglycerol lipase 2;^Eukaryota; Viridiplantae; Streptophyta; Embryophyta; Tracheophyta; Spermatophyta; Magnoliopsida; eudicotyledons; Gunneridae; Pentapetalae; rosids; malvids; Brassicales; Brassicaceae; Camelineae; Arabidopsis	753	536	657	1606	2660	2350	2516	3965	8566	6125	3924	3423
Pl01G0000163800.v1	Pl01	18765102	18770995	Pl01G0000163800.2.v1	1-1713[+]	KEGG:ag:CAA83655	GO:0005634^cellular_component^nucleus`GO:0017111^molecular_function^nucleoside-triphosphatase activity`GO:0051028^biological_process^mRNA transport	PF01150.18^GDA1_CD39^GDA1/CD39 (nucleoside phosphatase) family^41-182^E:3.5e-42`PF01150.18^GDA1_CD39^GDA1/CD39 (nucleoside phosphatase) family^228-499^E:5.4e-55	GO:0016787^molecular_function^hydrolase activity	NTPA_PEA^NTPA_PEA^Q:43-1524,H:16-455^58.99%ID^E:0^RecName: Full=Nucleoside-triphosphatase;^Eukaryota; Viridiplantae; Streptophyta; Embryophyta; Tracheophyta; Spermatophyta; Magnoliopsida; eudicotyledons; Gunneridae; Pentapetalae; rosids; fabids; Fabales; Fabaceae; Papilionoideae; 50 kb inversion clade; NPAAA clade; Hologalegina; IRL clade; Fabeae; Pisum	NTPA_PEA^NTPA_PEA^Q:43-1524,H:16-455^58.99%ID^E:0^RecName: Full=Nucleoside-triphosphatase;^Eukaryota; Viridiplantae; Streptophyta; Embryophyta; Tracheophyta; Spermatophyta; Magnoliopsida; eudicotyledons; Gunneridae; Pentapetalae; rosids; fabids; Fabales; Fabaceae; Papilionoideae; 50 kb inversion clade; NPAAA clade; Hologalegina; IRL clade; Fabeae; Pisum	280	181	229	89	164	186	243	366	584	31	40	17
Pl01G0000181600.v1	Pl01	21068759	21070374	Pl01G0000181600.2.v1	1-1047[+]	KEGG:ath:AT3G04070	GO:0005634^cellular_component^nucleus`GO:0003677^molecular_function^DNA binding`GO:0003700^molecular_function^DNA-binding transcription factor activity`GO:0009793^biological_process^embryo development ending in seed dormancy`GO:0010365^biological_process^positive regulation of ethylene biosynthetic process`GO:0009413^biological_process^response to flooding	PF02365.16^NAM^No apical meristem (NAM) protein^12-142^E:8.5e-40	GO:0003677^molecular_function^DNA binding`GO:0006355^biological_process^regulation of transcription, DNA-templated	NAC47_ARATH^NAC47_ARATH^Q:7-939,H:2-324^51.775%ID^E:1.32e-99^RecName: Full=NAC transcription factor 47 {ECO:0000305};^Eukaryota; Viridiplantae; Streptophyta; Embryophyta; Tracheophyta; Spermatophyta; Magnoliopsida; eudicotyledons; Gunneridae; Pentapetalae; rosids; malvids; Brassicales; Brassicaceae; Camelineae; Arabidopsis	NAC47_ARATH^NAC47_ARATH^Q:7-939,H:2-324^51.775%ID^E:1.32e-99^RecName: Full=NAC transcription factor 47 {ECO:0000305};^Eukaryota; Viridiplantae; Streptophyta; Embryophyta; Tracheophyta; Spermatophyta; Magnoliopsida; eudicotyledons; Gunneridae; Pentapetalae; rosids; malvids; Brassicales; Brassicaceae; Camelineae; Arabidopsis	81	72	76	3196	4737	3999	2529	4384	8718	5324	3817	3397
Pl01G0000195400.v1	Pl01	23091126	23092890	Pl01G0000195400.1.v1	162-597[+]	KEGG:ath:AT4G37760`KO:K00511	GO:0005783^cellular_component^endoplasmic reticulum`GO:0016021^cellular_component^integral component of membrane`GO:0050660^molecular_function^flavin adenine dinucleotide binding`GO:0004506^molecular_function^squalene monooxygenase activity`GO:0009753^biological_process^response to jasmonic acid`GO:0009611^biological_process^response to wounding`GO:0016126^biological_process^sterol biosynthetic p…	.	.	ERG16_ARATH^ERG16_ARATH^Q:695-802,H:115-150^72.222%ID^E:1e-12^RecName: Full=Squalene epoxidase 3;^Eukaryota; Viridiplantae; Streptophyta; Embryophyta; Tracheophyta; Spermatophyta; Magnoliopsida; eudicotyledons; Gunneridae; Pentapetalae; rosids; malvids; Brassicales; Brassicaceae; Camelineae; Arabidopsis`ERG16_ARATH^ERG16_ARATH^Q:805-870,H:150-171^72.727%ID^E:1e-12^RecName: Full=Squalene epoxidase…	ERG16_ARATH^ERG16_ARATH^Q:695-802,H:115-150^72.222%ID^E:1e-12^RecName: Full=Squalene epoxidase 3;^Eukaryota; Viridiplantae; Streptophyta; Embryophyta; Tracheophyta; Spermatophyta; Magnoliopsida; eudicotyledons; Gunneridae; Pentapetalae; rosids; malvids; Brassicales; Brassicaceae; Camelineae; Arabidopsis`ERG16_ARATH^ERG16_ARATH^Q:805-870,H:150-171^72.727%ID^E:1e-12^RecName: Full=Squalene epoxidase…	0	0	0	0	0	0	82	188	408	214	125	66
Pl01G0000195900.v1	Pl01	23196932	23199124	Pl01G0000195900.1.v1	183-1197[+]	KEGG:ath:AT5G18270	GO:0005737^cellular_component^cytoplasm`GO:0005634^cellular_component^nucleus`GO:0003677^molecular_function^DNA binding`GO:0003700^molecular_function^DNA-binding transcription factor activity	PF02365.16^NAM^No apical meristem (NAM) protein^17-142^E:3.9e-40	GO:0003677^molecular_function^DNA binding`GO:0006355^biological_process^regulation of transcription, DNA-templated	NAC87_ARATH^NAC87_ARATH^Q:183-686,H:5-173^84.024%ID^E:2.8e-100^RecName: Full=NAC domain-containing protein 87 {ECO:0000303|PubMed:15029955};^Eukaryota; Viridiplantae; Streptophyta; Embryophyta; Tracheophyta; Spermatophyta; Magnoliopsida; eudicotyledons; Gunneridae; Pentapetalae; rosids; malvids; Brassicales; Brassicaceae; Camelineae; Arabidopsis	NAC87_ARATH^NAC87_ARATH^Q:183-686,H:5-173^84.024%ID^E:2.8e-100^RecName: Full=NAC domain-containing protein 87 {ECO:0000303|PubMed:15029955};^Eukaryota; Viridiplantae; Streptophyta; Embryophyta; Tracheophyta; Spermatophyta; Magnoliopsida; eudicotyledons; Gunneridae; Pentapetalae; rosids; malvids; Brassicales; Brassicaceae; Camelineae; Arabidopsis	144	107	107	281	447	443	607	1066	2177	1119	756	720
Pl01G0000219600.v1	Pl01	26500584	26501151	Pl01G0000219600.1.v1	30-342[+]	KEGG:ath:AT5G06270	GO:0005634^cellular_component^nucleus`GO:0045892^biological_process^negative regulation of transcription, DNA-templated`GO:0080147^biological_process^root hair cell development	.	.	GIR1_ARATH^GIR1_ARATH^Q:228-341,H:62-99^60.526%ID^E:3.21e-09^RecName: Full=Protein GL2-INTERACTING REPRESSOR 1 {ECO:0000303|PubMed:28526410};^Eukaryota; Viridiplantae; Streptophyta; Embryophyta; Tracheophyta; Spermatophyta; Magnoliopsida; eudicotyledons; Gunneridae; Pentapetalae; rosids; malvids; Brassicales; Brassicaceae; Camelineae; Arabidopsis	GIR1_ARATH^GIR1_ARATH^Q:228-341,H:62-99^60.526%ID^E:3.21e-09^RecName: Full=Protein GL2-INTERACTING REPRESSOR 1 {ECO:0000303|PubMed:28526410};^Eukaryota; Viridiplantae; Streptophyta; Embryophyta; Tracheophyta; Spermatophyta; Magnoliopsida; eudicotyledons; Gunneridae; Pentapetalae; rosids; malvids; Brassicales; Brassicaceae; Camelineae; Arabidopsis	0	0	0	33	134	77	24	42	68	275	136	110
Pl01G0000220100.v1	Pl01	26625409	26628137	Pl01G0000220100.1.v1	178-876[+]	KEGG:ath:AT1G08570	GO:0009507^cellular_component^chloroplast`GO:0031969^cellular_component^chloroplast membrane`GO:0009570^cellular_component^chloroplast stroma`GO:0016671^molecular_function^oxidoreductase activity, acting on a sulfur group of donors, disulfide as acceptor	PF00085.21^Thioredoxin^Thioredoxin^119-190^E:5.9e-14	GO:0045454^biological_process^cell redox homeostasis	TRL11_ARATH^TRL11_ARATH^Q:178-1050,H:1-275^61.486%ID^E:1.58e-97^RecName: Full=Thioredoxin-like 1-1, chloroplastic;^Eukaryota; Viridiplantae; Streptophyta; Embryophyta; Tracheophyta; Spermatophyta; Magnoliopsida; eudicotyledons; Gunneridae; Pentapetalae; rosids; malvids; Brassicales; Brassicaceae; Camelineae; Arabidopsis	TRL11_ARATH^TRL11_ARATH^Q:178-1050,H:1-275^61.486%ID^E:1.58e-97^RecName: Full=Thioredoxin-like 1-1, chloroplastic;^Eukaryota; Viridiplantae; Streptophyta; Embryophyta; Tracheophyta; Spermatophyta; Magnoliopsida; eudicotyledons; Gunneridae; Pentapetalae; rosids; malvids; Brassicales; Brassicaceae; Camelineae; Arabidopsis	510	454	394	1811	2484	2087	1676	2667	5756	5009	3584	3529
Pl01G0000222000.v1	Pl01	26904343	26906330	Pl01G0000222000.1.v1;Pl01G0000222000.2.v1;Pl01G0000222000.3.v1	445-159[+];444-198[+];290-153[+]	.;.;.	.;.;.	.;.;.	.;.;.	.;.;.	.;.;.	4	0	0	5	0	0	568	957	2091	1251	939	643
Pl01G0000222200.v1	Pl01	26925104	26927142	Pl01G0000222200.1.v1	1-1836[+]	.	.	PF00076.23^RRM_1^RNA recognition motif. (a.k.a. RRM, RBD, or RNP domain)^9-53^E:7.9e-06`PF14111.7^DUF4283^Domain of unknown function (DUF4283)^116-241^E:3.3e-14	GO:0003676^molecular_function^nucleic acid binding	.	.	0	0	0	0	0	0	0	4	0	28	71	19
Pl01G0000226800.v1	Pl01	27685648	27686771	Pl01G0000226800.1.v1	1-852[+]	.	.	.	.	.	.	120	117	109	623	1000	793	475	957	2170	2224	1435	1289
Pl01G0000227400.v1	Pl01	27755581	27758726	Pl01G0000227400.1.v1	1-1398[+]	KEGG:ath:AT5G03795	GO:0000139^cellular_component^Golgi membrane`GO:0016021^cellular_component^integral component of membrane`GO:0016757^molecular_function^transferase activity, transferring glycosyl groups`GO:0071555^biological_process^cell wall organization`GO:0006486^biological_process^protein glycosylation	PF03016.16^Exostosin^Exostosin family^139-415^E:3.4e-60	.	GLYT3_ARATH^GLYT3_ARATH^Q:370-1392,H:172-515^38.418%ID^E:2.22e-68^RecName: Full=Probable glycosyltransferase At5g03795;^Eukaryota; Viridiplantae; Streptophyta; Embryophyta; Tracheophyta; Spermatophyta; Magnoliopsida; eudicotyledons; Gunneridae; Pentapetalae; rosids; malvids; Brassicales; Brassicaceae; Camelineae; Arabidopsis	GLYT3_ARATH^GLYT3_ARATH^Q:370-1392,H:172-515^38.418%ID^E:2.22e-68^RecName: Full=Probable glycosyltransferase At5g03795;^Eukaryota; Viridiplantae; Streptophyta; Embryophyta; Tracheophyta; Spermatophyta; Magnoliopsida; eudicotyledons; Gunneridae; Pentapetalae; rosids; malvids; Brassicales; Brassicaceae; Camelineae; Arabidopsis	0	0	0	15	20	7	38	44	102	88	58	54
Pl01G0000230500.v1	Pl01	28310276	28311844	Pl01G0000230500.1.v1	1-1569[+]	KEGG:mtr:MTR_6g027840	GO:0005737^cellular_component^cytoplasm`GO:0005634^cellular_component^nucleus`GO:0085042^cellular_component^periarbuscular membrane`GO:0005886^cellular_component^plasma membrane`GO:0036377^biological_process^arbuscular mycorrhizal association`GO:0009877^biological_process^nodulation`GO:0002237^biological_process^response to molecule of bacterial origin`GO:0009609^biological_process^response to sy…	PF00635.27^Motile_Sperm^MSP (Major sperm protein) domain^5-108^E:2.2e-07`PF12796.8^Ank_2^Ankyrin repeats (3 copies)^166-230^E:5.7e-09`PF13857.7^Ank_5^Ankyrin repeats (many copies)^170-213^E:2e-07`PF00023.31^Ank^Ankyrin repeat^172-203^E:0.00023`PF13606.7^Ank_3^Ankyrin repeat^172-200^E:0.00022`PF13637.7^Ank_4^Ankyrin repeats (many copies)^174-215^E:5.4e-08`PF12796.8^Ank_2^Ankyrin repeats (3 copies)…	GO:0005515^molecular_function^protein binding	VPY_MEDTR^VPY_MEDTR^Q:1-1566,H:1-541^67.159%ID^E:0^RecName: Full=Protein VAPYRIN {ECO:0000303|PubMed:19912567};^Eukaryota; Viridiplantae; Streptophyta; Embryophyta; Tracheophyta; Spermatophyta; Magnoliopsida; eudicotyledons; Gunneridae; Pentapetalae; rosids; fabids; Fabales; Fabaceae; Papilionoideae; 50 kb inversion clade; NPAAA clade; Hologalegina; IRL clade; Trifolieae; Medicago	VPY_MEDTR^VPY_MEDTR^Q:1-1566,H:1-541^67.159%ID^E:0^RecName: Full=Protein VAPYRIN {ECO:0000303|PubMed:19912567};^Eukaryota; Viridiplantae; Streptophyta; Embryophyta; Tracheophyta; Spermatophyta; Magnoliopsida; eudicotyledons; Gunneridae; Pentapetalae; rosids; fabids; Fabales; Fabaceae; Papilionoideae; 50 kb inversion clade; NPAAA clade; Hologalegina; IRL clade; Trifolieae; Medicago	4	2	3	33	72	76	0	5	9	2	11	27
Pl01G0000231100.v1	Pl01	28389701	28394859	Pl01G0000231100.1.v1	1-2037[+]	.	.	PF04842.13^DUF639^Plant protein of unknown function (DUF639)^442-667^E:4.4e-60	.	.	.	0	0	0	65	164	84	40	104	191	5769	1921	2191
Pl01G0000232000.v1	Pl01	28574446	28576464	Pl01G0000232000.1.v1	1-855[+]	KEGG:ath:AT5G39890`KO:K23953	GO:0005829^cellular_component^cytosol`GO:0005634^cellular_component^nucleus`GO:0017172^molecular_function^cysteine dioxygenase activity`GO:0046872^molecular_function^metal ion binding`GO:0071456^biological_process^cellular response to hypoxia`GO:0070483^biological_process^detection of hypoxia`GO:0018171^biological_process^peptidyl-cysteine oxidation`GO:0001666^biological_process^response to hypox…	PF07847.13^PCO_ADO^PCO_ADO^75-281^E:3.5e-69	GO:0016702^molecular_function^oxidoreductase activity, acting on single donors with incorporation of molecular oxygen, incorporation of two atoms of oxygen`GO:0055114^biological_process^oxidation-reduction process	PCO2_ARATH^PCO2_ARATH^Q:22-846,H:12-273^42.143%ID^E:2.24e-69^RecName: Full=Plant cysteine oxidase 2 {ECO:0000303|PubMed:24599061};^Eukaryota; Viridiplantae; Streptophyta; Embryophyta; Tracheophyta; Spermatophyta; Magnoliopsida; eudicotyledons; Gunneridae; Pentapetalae; rosids; malvids; Brassicales; Brassicaceae; Camelineae; Arabidopsis	PCO2_ARATH^PCO2_ARATH^Q:22-846,H:12-273^42.143%ID^E:2.24e-69^RecName: Full=Plant cysteine oxidase 2 {ECO:0000303|PubMed:24599061};^Eukaryota; Viridiplantae; Streptophyta; Embryophyta; Tracheophyta; Spermatophyta; Magnoliopsida; eudicotyledons; Gunneridae; Pentapetalae; rosids; malvids; Brassicales; Brassicaceae; Camelineae; Arabidopsis	16	12	10	247	298	400	56	89	127	1732	1119	890
Pl01G0000233400.v1	Pl01	28826411	28829494	Pl01G0000233400.1.v1	50-1245[+]	KEGG:ath:AT3G03740`KO:K10523	GO:0005829^cellular_component^cytosol`GO:0071472^biological_process^cellular response to salt stress`GO:0042631^biological_process^cellular response to water deprivation`GO:0016567^biological_process^protein ubiquitination`GO:0006970^biological_process^response to osmotic stress	PF00651.32^BTB^BTB/POZ domain^208-327^E:8e-25	GO:0005515^molecular_function^protein binding	BPM4_ARATH^BPM4_ARATH^Q:149-1228,H:34-392^56.233%ID^E:1.04e-132^RecName: Full=BTB/POZ and MATH domain-containing protein 4;^Eukaryota; Viridiplantae; Streptophyta; Embryophyta; Tracheophyta; Spermatophyta; Magnoliopsida; eudicotyledons; Gunneridae; Pentapetalae; rosids; malvids; Brassicales; Brassicaceae; Camelineae; Arabidopsis	BPM4_ARATH^BPM4_ARATH^Q:149-1228,H:34-392^56.233%ID^E:1.04e-132^RecName: Full=BTB/POZ and MATH domain-containing protein 4;^Eukaryota; Viridiplantae; Streptophyta; Embryophyta; Tracheophyta; Spermatophyta; Magnoliopsida; eudicotyledons; Gunneridae; Pentapetalae; rosids; malvids; Brassicales; Brassicaceae; Camelineae; Arabidopsis	0	0	7	91	268	150	8	28	55	154	137	126
Pl01G0000233800.v1	Pl01	28879530	28881394	Pl01G0000233800.1.v1	72-1260[+]	KEGG:ath:AT3G03740`KO:K10523	GO:0005829^cellular_component^cytosol`GO:0071472^biological_process^cellular response to salt stress`GO:0042631^biological_process^cellular response to water deprivation`GO:0016567^biological_process^protein ubiquitination`GO:0006970^biological_process^response to osmotic stress	PF00917.27^MATH^MATH domain^47-162^E:0.025`PF00651.32^BTB^BTB/POZ domain^192-308^E:9.6e-24	GO:0005515^molecular_function^protein binding	BPM4_ARATH^BPM4_ARATH^Q:66-1193,H:10-392^56.25%ID^E:5.72e-144^RecName: Full=BTB/POZ and MATH domain-containing protein 4;^Eukaryota; Viridiplantae; Streptophyta; Embryophyta; Tracheophyta; Spermatophyta; Magnoliopsida; eudicotyledons; Gunneridae; Pentapetalae; rosids; malvids; Brassicales; Brassicaceae; Camelineae; Arabidopsis	BPM4_ARATH^BPM4_ARATH^Q:66-1193,H:10-392^56.25%ID^E:5.72e-144^RecName: Full=BTB/POZ and MATH domain-containing protein 4;^Eukaryota; Viridiplantae; Streptophyta; Embryophyta; Tracheophyta; Spermatophyta; Magnoliopsida; eudicotyledons; Gunneridae; Pentapetalae; rosids; malvids; Brassicales; Brassicaceae; Camelineae; Arabidopsis	14	23	40	86	182	179	48	48	108	65	31	18
Pl01G0000234300.v1	Pl01	28962306	28969447	Pl01G0000234300.1.v1	1-1968[+]	KEGG:ath:AT1G58030	GO:0016021^cellular_component^integral component of membrane`GO:0009705^cellular_component^plant-type vacuole membrane`GO:0005774^cellular_component^vacuolar membrane`GO:0005773^cellular_component^vacuole`GO:0015171^molecular_function^amino acid transmembrane transporter activity`GO:0080144^biological_process^amino acid homeostasis`GO:0006865^biological_process^amino acid transport	PF13520.7^AA_permease_2^Amino acid permease^45-423^E:2.3e-50`PF00324.22^AA_permease^Amino acid permease^45-416^E:1.2e-41`PF13906.7^AA_permease_C^C-terminus of AA_permease^557-583^E:2e-06	GO:0022857^molecular_function^transmembrane transporter activity`GO:0055085^biological_process^transmembrane transport`GO:0016020^cellular_component^membrane	CAAT2_ARATH^CAAT2_ARATH^Q:1-1965,H:1-635^62.387%ID^E:0^RecName: Full=Cationic amino acid transporter 2, vacuolar;^Eukaryota; Viridiplantae; Streptophyta; Embryophyta; Tracheophyta; Spermatophyta; Magnoliopsida; eudicotyledons; Gunneridae; Pentapetalae; rosids; malvids; Brassicales; Brassicaceae; Camelineae; Arabidopsis	CAAT2_ARATH^CAAT2_ARATH^Q:1-1965,H:1-635^62.387%ID^E:0^RecName: Full=Cationic amino acid transporter 2, vacuolar;^Eukaryota; Viridiplantae; Streptophyta; Embryophyta; Tracheophyta; Spermatophyta; Magnoliopsida; eudicotyledons; Gunneridae; Pentapetalae; rosids; malvids; Brassicales; Brassicaceae; Camelineae; Arabidopsis	12	7	22	112	138	118	30	31	99	493	382	364
Pl01G0000234400.v1	Pl01	28971622	28974365	Pl01G0000234400.1.v1	519-255[+]	.	.	.	.	.	.	0	0	0	0	0	0	715	1115	2413	769	650	811
Pl01G0000234900.v1	Pl01	29115726	29116209	Pl01G0000234900.1.v1	59-306[+]	.	.	.	.	.	.	35	15	43	16	29	32	0	0	0	0	0	0
Pl01G0000237700.v1	Pl01	29488094	29489310	Pl01G0000237700.1.v1	85-282[+]	.	.	.	.	.	.	152	105	138	10	14	6	1210	1656	3497	25	11	0
Pl01G0000238700.v1	Pl01	29652796	29655047	Pl01G0000238700.1.v1	13-927[+]	KEGG:ath:AT4G26010`KO:K00430	GO:0005576^cellular_component^extracellular region`GO:0009505^cellular_component^plant-type cell wall`GO:0009506^cellular_component^plasmodesma`GO:0020037^molecular_function^heme binding`GO:0046872^molecular_function^metal ion binding`GO:0004601^molecular_function^peroxidase activity`GO:0042744^biological_process^hydrogen peroxide catabolic process`GO:0006979^biological_process^response to oxidat…	PF00141.24^peroxidase^Peroxidase^37-271^E:2e-71	GO:0004601^molecular_function^peroxidase activity`GO:0020037^molecular_function^heme binding`GO:0006979^biological_process^response to oxidative stress`GO:0055114^biological_process^oxidation-reduction process	PER44_ARATH^PER44_ARATH^Q:13-936,H:1-309^56.774%ID^E:5.79e-122^RecName: Full=Peroxidase 44;^Eukaryota; Viridiplantae; Streptophyta; Embryophyta; Tracheophyta; Spermatophyta; Magnoliopsida; eudicotyledons; Gunneridae; Pentapetalae; rosids; malvids; Brassicales; Brassicaceae; Camelineae; Arabidopsis	PER44_ARATH^PER44_ARATH^Q:13-936,H:1-309^56.774%ID^E:5.79e-122^RecName: Full=Peroxidase 44;^Eukaryota; Viridiplantae; Streptophyta; Embryophyta; Tracheophyta; Spermatophyta; Magnoliopsida; eudicotyledons; Gunneridae; Pentapetalae; rosids; malvids; Brassicales; Brassicaceae; Camelineae; Arabidopsis	7	16	0	49	60	74	0	7	4	74	63	24
Pl01G0000239100.v1	Pl01	29687581	29689788	Pl01G0000239100.1.v1	1-963[+]	KEGG:osa:4344325	GO:0005634^cellular_component^nucleus`GO:0003677^molecular_function^DNA binding`GO:0010311^biological_process^lateral root formation	PF00046.30^Homeodomain^Homeodomain^23-83^E:1.4e-12	GO:0003677^molecular_function^DNA binding	WOX11_ORYSJ^WOX11_ORYSJ^Q:37-222,H:9-71^85.714%ID^E:7.86e-30^RecName: Full=WUSCHEL-related homeobox 11 {ECO:0000303|PubMed:17351053};^Eukaryota; Viridiplantae; Streptophyta; Embryophyta; Tracheophyta; Spermatophyta; Magnoliopsida; Liliopsida; Poales; Poaceae; BOP clade; Oryzoideae; Oryzeae; Oryzinae; Oryza; Oryza sativa`WOX11_ORYSJ^WOX11_ORYSJ^Q:634-819,H:199-260^61.29%ID^E:4.04e-19^RecName: Full…	WOX11_ORYSJ^WOX11_ORYSJ^Q:37-222,H:9-71^85.714%ID^E:7.86e-30^RecName: Full=WUSCHEL-related homeobox 11 {ECO:0000303|PubMed:17351053};^Eukaryota; Viridiplantae; Streptophyta; Embryophyta; Tracheophyta; Spermatophyta; Magnoliopsida; Liliopsida; Poales; Poaceae; BOP clade; Oryzoideae; Oryzeae; Oryzinae; Oryza; Oryza sativa`WOX11_ORYSJ^WOX11_ORYSJ^Q:634-819,H:199-260^61.29%ID^E:4.04e-19^RecName: Full…	0	0	3	37	66	58	15	43	46	80	72	42
Pl01G0000239200.v1	Pl01	29739101	29741935	Pl01G0000239200.1.v1	362-1083[+]	KEGG:osa:4325181`KO:K09422	GO:0005634^cellular_component^nucleus`GO:0003700^molecular_function^DNA-binding transcription factor activity`GO:0043565^molecular_function^sequence-specific DNA binding`GO:0003712^molecular_function^transcription coregulator activity`GO:0000976^molecular_function^transcription regulatory region sequence-specific DNA binding`GO:0006355^biological_process^regulation of transcription, DNA-templated	PF00249.32^Myb_DNA-binding^Myb-like DNA-binding domain^106-151^E:9e-16`PF13921.7^Myb_DNA-bind_6^Myb-like DNA-binding domain^109-169^E:3.5e-15`PF00249.32^Myb_DNA-binding^Myb-like DNA-binding domain^160-201^E:1.4e-12`PF13921.7^Myb_DNA-bind_6^Myb-like DNA-binding domain^163-208^E:2.7e-05	.	CSA_ORYSJ^CSA_ORYSJ^Q:665-1018,H:45-161^82.203%ID^E:2.63e-65^RecName: Full=Transcription factor CSA {ECO:0000305};^Eukaryota; Viridiplantae; Streptophyta; Embryophyta; Tracheophyta; Spermatophyta; Magnoliopsida; Liliopsida; Poales; Poaceae; BOP clade; Oryzoideae; Oryzeae; Oryzinae; Oryza; Oryza sativa	CSA_ORYSJ^CSA_ORYSJ^Q:665-1018,H:45-161^82.203%ID^E:2.63e-65^RecName: Full=Transcription factor CSA {ECO:0000305};^Eukaryota; Viridiplantae; Streptophyta; Embryophyta; Tracheophyta; Spermatophyta; Magnoliopsida; Liliopsida; Poales; Poaceae; BOP clade; Oryzoideae; Oryzeae; Oryzinae; Oryza; Oryza sativa	348	244	299	25	68	63	95	201	307	349	257	187
Pl01G0000241000.v1	Pl01	30111492	30117481	Pl01G0000241000.1.v1	1-1509[+]	KEGG:gmx:547778`KO:K01649	GO:0009507^cellular_component^chloroplast`GO:0005829^cellular_component^cytosol`GO:0003852^molecular_function^2-isopropylmalate synthase activity`GO:0009098^biological_process^leucine biosynthetic process`GO:0009877^biological_process^nodulation	PF00682.20^HMGL-like^HMGL-like^23-271^E:2.4e-85`PF08502.11^LeuA_dimer^LeuA allosteric (dimerisation) domain^354-497^E:4.3e-30	GO:0003824^molecular_function^catalytic activity`GO:0003852^molecular_function^2-isopropylmalate synthase activity`GO:0009098^biological_process^leucine biosynthetic process	LEU1_SOYBN^LEU1_SOYBN^Q:16-1506,H:16-560^63.853%ID^E:0^RecName: Full=Probable 2-isopropylmalate synthase;^Eukaryota; Viridiplantae; Streptophyta; Embryophyta; Tracheophyta; Spermatophyta; Magnoliopsida; eudicotyledons; Gunneridae; Pentapetalae; rosids; fabids; Fabales; Fabaceae; Papilionoideae; 50 kb inversion clade; NPAAA clade; indigoferoid/millettioid clade; Phaseoleae; Glycine; Glycine subgen…	LEU1_SOYBN^LEU1_SOYBN^Q:16-1506,H:16-560^63.853%ID^E:0^RecName: Full=Probable 2-isopropylmalate synthase;^Eukaryota; Viridiplantae; Streptophyta; Embryophyta; Tracheophyta; Spermatophyta; Magnoliopsida; eudicotyledons; Gunneridae; Pentapetalae; rosids; fabids; Fabales; Fabaceae; Papilionoideae; 50 kb inversion clade; NPAAA clade; indigoferoid/millettioid clade; Phaseoleae; Glycine; Glycine subgen…	1366	1187	1077	147	372	256	292	400	1035	23	14	14
Pl01G0000241500.v1	Pl01	30140824	30147169	Pl01G0000241500.1.v1	1-1635[+]	KEGG:gmx:547778`KO:K01649	GO:0009507^cellular_component^chloroplast`GO:0005829^cellular_component^cytosol`GO:0003852^molecular_function^2-isopropylmalate synthase activity`GO:0009098^biological_process^leucine biosynthetic process`GO:0009877^biological_process^nodulation	PF00682.20^HMGL-like^HMGL-like^23-302^E:2.4e-91`PF08502.11^LeuA_dimer^LeuA allosteric (dimerisation) domain^396-540^E:1e-28	GO:0003824^molecular_function^catalytic activity`GO:0003852^molecular_function^2-isopropylmalate synthase activity`GO:0009098^biological_process^leucine biosynthetic process	LEU1_SOYBN^LEU1_SOYBN^Q:16-1632,H:16-560^69.908%ID^E:0^RecName: Full=Probable 2-isopropylmalate synthase;^Eukaryota; Viridiplantae; Streptophyta; Embryophyta; Tracheophyta; Spermatophyta; Magnoliopsida; eudicotyledons; Gunneridae; Pentapetalae; rosids; fabids; Fabales; Fabaceae; Papilionoideae; 50 kb inversion clade; NPAAA clade; indigoferoid/millettioid clade; Phaseoleae; Glycine; Glycine subgen…	LEU1_SOYBN^LEU1_SOYBN^Q:16-1632,H:16-560^69.908%ID^E:0^RecName: Full=Probable 2-isopropylmalate synthase;^Eukaryota; Viridiplantae; Streptophyta; Embryophyta; Tracheophyta; Spermatophyta; Magnoliopsida; eudicotyledons; Gunneridae; Pentapetalae; rosids; fabids; Fabales; Fabaceae; Papilionoideae; 50 kb inversion clade; NPAAA clade; indigoferoid/millettioid clade; Phaseoleae; Glycine; Glycine subgen…	5969	4020	4676	802	1259	1176	1007	1821	3938	30	36	22
Pl01G0000242700.v1	Pl01	30303390	30304621	Pl01G0000242700.1.v1	474-249[+]	.	.	.	.	.	.	8	2	3	13	8	7	129	194	420	20	20	31
Pl01G0000242800.v1	Pl01	30306265	30306531	Pl01G0000242800.1.v1	53-120[+]	.	.	.	.	.	.	23	12	12	2	3	0	17	28	30	0	2	0
Pl01G0000243700.v1	Pl01	30439462	30442958	Pl01G0000243700.1.v1	15-1017[+]	.	.	.	.	.	.	1323	1219	1242	388	712	482	609	1108	2555	284	122	172
Pl01G0000244400.v1	Pl01	30521756	30524452	Pl01G0000244400.1.v1	184-1305[+]	.	.	PF02902.20^Peptidase_C48^Ulp1 protease family, C-terminal catalytic domain^279-367^E:1.6e-05	GO:0008234^molecular_function^cysteine-type peptidase activity`GO:0006508^biological_process^proteolysis	.	.	0	0	0	0	0	0	15	27	47	23	14	11
Pl01G0000245700.v1	Pl01	30655991	30657470	Pl01G0000245700.1.v1	119-954[+]	KEGG:ath:AT5G04200	GO:0048046^cellular_component^apoplast`GO:0008234^molecular_function^cysteine-type peptidase activity	PF00656.23^Peptidase_C14^Caspase domain^7-308^E:5.1e-60	.	MCA9_ARATH^MCA9_ARATH^Q:131-1054,H:8-325^65.625%ID^E:9.92e-146^RecName: Full=Metacaspase-9;^Eukaryota; Viridiplantae; Streptophyta; Embryophyta; Tracheophyta; Spermatophyta; Magnoliopsida; eudicotyledons; Gunneridae; Pentapetalae; rosids; malvids; Brassicales; Brassicaceae; Camelineae; Arabidopsis	MCA9_ARATH^MCA9_ARATH^Q:131-1054,H:8-325^65.625%ID^E:9.92e-146^RecName: Full=Metacaspase-9;^Eukaryota; Viridiplantae; Streptophyta; Embryophyta; Tracheophyta; Spermatophyta; Magnoliopsida; eudicotyledons; Gunneridae; Pentapetalae; rosids; malvids; Brassicales; Brassicaceae; Camelineae; Arabidopsis	148	98	172	1434	2238	2113	4857	7045	16373	2883	2020	1881
Pl01G0000245900.v1	Pl01	30673749	30676985	Pl01G0000245900.4.v1	1-954[+]	KEGG:gmx:547778`KO:K01649	GO:0009507^cellular_component^chloroplast`GO:0005829^cellular_component^cytosol`GO:0003852^molecular_function^2-isopropylmalate synthase activity`GO:0009098^biological_process^leucine biosynthetic process`GO:0009877^biological_process^nodulation	PF00682.20^HMGL-like^HMGL-like^2-69^E:1.1e-24`PF08502.11^LeuA_dimer^LeuA allosteric (dimerisation) domain^169-313^E:8.4e-30	GO:0003824^molecular_function^catalytic activity`GO:0003852^molecular_function^2-isopropylmalate synthase activity`GO:0009098^biological_process^leucine biosynthetic process	LEU1_SOYBN^LEU1_SOYBN^Q:1-951,H:213-560^61.494%ID^E:4.41e-140^RecName: Full=Probable 2-isopropylmalate synthase;^Eukaryota; Viridiplantae; Streptophyta; Embryophyta; Tracheophyta; Spermatophyta; Magnoliopsida; eudicotyledons; Gunneridae; Pentapetalae; rosids; fabids; Fabales; Fabaceae; Papilionoideae; 50 kb inversion clade; NPAAA clade; indigoferoid/millettioid clade; Phaseoleae; Glycine; Glycine…	LEU1_SOYBN^LEU1_SOYBN^Q:1-951,H:213-560^61.494%ID^E:4.41e-140^RecName: Full=Probable 2-isopropylmalate synthase;^Eukaryota; Viridiplantae; Streptophyta; Embryophyta; Tracheophyta; Spermatophyta; Magnoliopsida; eudicotyledons; Gunneridae; Pentapetalae; rosids; fabids; Fabales; Fabaceae; Papilionoideae; 50 kb inversion clade; NPAAA clade; indigoferoid/millettioid clade; Phaseoleae; Glycine; Glycine…	254	155	184	91	106	152	2168	3606	7516	2546	1949	1829
Pl01G0000246100.v1	Pl01	30691751	30693796	Pl01G0000246100.1.v1	790-198[+]	KEGG:ath:AT5G20640	.	.	.	LOR16_ARATH^LOR16_ARATH^Q:342-199,H:167-215^51.02%ID^E:9.09e-07^RecName: Full=Protein LURP-one-related 16;^Eukaryota; Viridiplantae; Streptophyta; Embryophyta; Tracheophyta; Spermatophyta; Magnoliopsida; eudicotyledons; Gunneridae; Pentapetalae; rosids; malvids; Brassicales; Brassicaceae; Camelineae; Arabidopsis	LOR16_ARATH^LOR16_ARATH^Q:342-199,H:167-215^51.02%ID^E:9.09e-07^RecName: Full=Protein LURP-one-related 16;^Eukaryota; Viridiplantae; Streptophyta; Embryophyta; Tracheophyta; Spermatophyta; Magnoliopsida; eudicotyledons; Gunneridae; Pentapetalae; rosids; malvids; Brassicales; Brassicaceae; Camelineae; Arabidopsis	41	49	46	18	42	11	846	1121	2546	1536	908	958
Pl01G0000246800.v1	Pl01	30755134	30758385	Pl01G0000246800.1.v1	89-1473[+]	KEGG:ath:AT1G33110`KO:K03327	GO:0016021^cellular_component^integral component of membrane`GO:0016020^cellular_component^membrane`GO:0005634^cellular_component^nucleus`GO:0015297^molecular_function^antiporter activity`GO:0022857^molecular_function^transmembrane transporter activity`GO:0042910^molecular_function^xenobiotic transmembrane transporter activity	PF01554.19^MatE^MatE^43-203^E:1.5e-28`PF01554.19^MatE^MatE^266-425^E:6.6e-28	GO:0015297^molecular_function^antiporter activity`GO:0006855^biological_process^drug transmembrane transport`GO:0055085^biological_process^transmembrane transport`GO:0016020^cellular_component^membrane	DTX21_ARATH^DTX21_ARATH^Q:95-1558,H:6-494^63.599%ID^E:0^RecName: Full=Protein DETOXIFICATION 21 {ECO:0000303|PubMed:11739388};^Eukaryota; Viridiplantae; Streptophyta; Embryophyta; Tracheophyta; Spermatophyta; Magnoliopsida; eudicotyledons; Gunneridae; Pentapetalae; rosids; malvids; Brassicales; Brassicaceae; Camelineae; Arabidopsis	DTX21_ARATH^DTX21_ARATH^Q:95-1558,H:6-494^63.599%ID^E:0^RecName: Full=Protein DETOXIFICATION 21 {ECO:0000303|PubMed:11739388};^Eukaryota; Viridiplantae; Streptophyta; Embryophyta; Tracheophyta; Spermatophyta; Magnoliopsida; eudicotyledons; Gunneridae; Pentapetalae; rosids; malvids; Brassicales; Brassicaceae; Camelineae; Arabidopsis	532	514	453	154	292	228	126	165	435	60	32	28
Pl01G0000248500.v1	Pl01	31008393	31010739	Pl01G0000248500.1.v1	1-744[+]	.	.	PF03745.15^DUF309^Domain of unknown function (DUF309)^73-129^E:1.4e-19	.	.	.	56	36	39	167	237	213	273	318	745	503	334	406
Pl01G0000249400.v1	Pl01	31130812	31139411	Pl01G0000249400.1.v1	1-2064[+]	KEGG:ath:AT3G10740`KO:K01209	GO:0048046^cellular_component^apoplast`GO:0099503^cellular_component^secretory vesicle`GO:0005773^cellular_component^vacuole`GO:0046556^molecular_function^alpha-L-arabinofuranosidase activity`GO:0009044^molecular_function^xylan 1,4-beta-xylosidase activity`GO:0046373^biological_process^L-arabinose metabolic process`GO:0045493^biological_process^xylan catabolic process	PF06964.13^Alpha-L-AF_C^Alpha-L-arabinofuranosidase C-terminal domain^473-660^E:6.5e-35	GO:0046556^molecular_function^alpha-L-arabinofuranosidase activity`GO:0046373^biological_process^L-arabinose metabolic process	ASD1_ARATH^ASD1_ARATH^Q:1-2058,H:3-675^66.183%ID^E:0^RecName: Full=Alpha-L-arabinofuranosidase 1;^Eukaryota; Viridiplantae; Streptophyta; Embryophyta; Tracheophyta; Spermatophyta; Magnoliopsida; eudicotyledons; Gunneridae; Pentapetalae; rosids; malvids; Brassicales; Brassicaceae; Camelineae; Arabidopsis	ASD1_ARATH^ASD1_ARATH^Q:1-2058,H:3-675^66.183%ID^E:0^RecName: Full=Alpha-L-arabinofuranosidase 1;^Eukaryota; Viridiplantae; Streptophyta; Embryophyta; Tracheophyta; Spermatophyta; Magnoliopsida; eudicotyledons; Gunneridae; Pentapetalae; rosids; malvids; Brassicales; Brassicaceae; Camelineae; Arabidopsis	732	610	639	1912	2851	2767	2538	3739	8082	7010	3853	3667
Pl01G0000251900.v1	Pl01	31407650	31409781	Pl01G0000251900.1.v1	1-1185[+]	KEGG:ath:AT5G07050	GO:0016021^cellular_component^integral component of membrane`GO:0005886^cellular_component^plasma membrane`GO:0022857^molecular_function^transmembrane transporter activity	PF00892.21^EamA^EamA-like transporter family^17-157^E:1.2e-11`PF00892.21^EamA^EamA-like transporter family^193-344^E:3.4e-09	GO:0016020^cellular_component^membrane`GO:0016021^cellular_component^integral component of membrane	WTR38_ARATH^WTR38_ARATH^Q:1-1179,H:3-379^60.302%ID^E:2.06e-146^RecName: Full=WAT1-related protein At5g07050;^Eukaryota; Viridiplantae; Streptophyta; Embryophyta; Tracheophyta; Spermatophyta; Magnoliopsida; eudicotyledons; Gunneridae; Pentapetalae; rosids; malvids; Brassicales; Brassicaceae; Camelineae; Arabidopsis	WTR38_ARATH^WTR38_ARATH^Q:1-1179,H:3-379^60.302%ID^E:2.06e-146^RecName: Full=WAT1-related protein At5g07050;^Eukaryota; Viridiplantae; Streptophyta; Embryophyta; Tracheophyta; Spermatophyta; Magnoliopsida; eudicotyledons; Gunneridae; Pentapetalae; rosids; malvids; Brassicales; Brassicaceae; Camelineae; Arabidopsis	402	273	412	1240	1966	1758	1552	2557	5235	2641	1702	1697
Pl01G0000259300.v1	Pl01	32397511	32397960	Pl01G0000259300.2.v1	1-450[+]	KEGG:ath:AT2G41180	GO:0009507^cellular_component^chloroplast`GO:0005634^cellular_component^nucleus`GO:0051091^biological_process^positive regulation of DNA-binding transcription factor activity	PF05678.15^VQ^VQ motif^35-61^E:4.2e-13	.	SIB2_ARATH^SIB2_ARATH^Q:85-423,H:36-130^38.261%ID^E:5.91e-11^RecName: Full=Sigma factor binding protein 2, chloroplastic;^Eukaryota; Viridiplantae; Streptophyta; Embryophyta; Tracheophyta; Spermatophyta; Magnoliopsida; eudicotyledons; Gunneridae; Pentapetalae; rosids; malvids; Brassicales; Brassicaceae; Camelineae; Arabidopsis	SIB2_ARATH^SIB2_ARATH^Q:85-423,H:36-130^38.261%ID^E:5.91e-11^RecName: Full=Sigma factor binding protein 2, chloroplastic;^Eukaryota; Viridiplantae; Streptophyta; Embryophyta; Tracheophyta; Spermatophyta; Magnoliopsida; eudicotyledons; Gunneridae; Pentapetalae; rosids; malvids; Brassicales; Brassicaceae; Camelineae; Arabidopsis	168	165	155	290	536	395	117	178	355	108	65	82
Pl01G0000261300.v1	Pl01	32653306	32654800	Pl01G0000261300.1.v1	231-786[+]	KEGG:ddi:DDB_G0268948	GO:0045335^cellular_component^phagocytic vesicle`GO:0008168^molecular_function^methyltransferase activity`GO:0032259^biological_process^methylation	PF08241.13^Methyltransf_11^Methyltransferase domain^39-128^E:5.6e-10`PF13649.7^Methyltransf_25^Methyltransferase domain^39-128^E:1e-07	GO:0008168^molecular_function^methyltransferase activity	Y8948_DICDI^Y8948_DICDI^Q:237-1001,H:13-261^32.7%ID^E:4.59e-31^RecName: Full=Putative methyltransferase DDB_G0268948;^Eukaryota; Amoebozoa; Evosea; Eumycetozoa; Dictyostelia; Dictyosteliales; Dictyosteliaceae; Dictyostelium	Y8948_DICDI^Y8948_DICDI^Q:237-1001,H:13-261^32.7%ID^E:4.59e-31^RecName: Full=Putative methyltransferase DDB_G0268948;^Eukaryota; Amoebozoa; Evosea; Eumycetozoa; Dictyostelia; Dictyosteliales; Dictyosteliaceae; Dictyostelium	2597	2085	2126	6005	9136	7766	1398	2138	4235	1765	1460	1411
Pl01G0000262100.v1	Pl01	32734635	32737111	Pl01G0000262100.1.v1	689-726[+]	KEGG:ath:AT3G57040`KO:K14492	GO:0005634^cellular_component^nucleus`GO:0000156^molecular_function^phosphorelay response regulator activity`GO:0007623^biological_process^circadian rhythm`GO:0009736^biological_process^cytokinin-activated signaling pathway`GO:0000160^biological_process^phosphorelay signal transduction system`GO:0006355^biological_process^regulation of transcription, DNA-templated`GO:0009735^biological_process^re…	PF00072.25^Response_reg^Response regulator receiver domain^11-141^E:1.6e-19	GO:0000160^biological_process^phosphorelay signal transduction system	ARR9_ARATH^ARR9_ARATH^Q:689-1411,H:1-234^61.885%ID^E:1.6e-87^RecName: Full=Two-component response regulator ARR9;^Eukaryota; Viridiplantae; Streptophyta; Embryophyta; Tracheophyta; Spermatophyta; Magnoliopsida; eudicotyledons; Gunneridae; Pentapetalae; rosids; malvids; Brassicales; Brassicaceae; Camelineae; Arabidopsis	ARR9_ARATH^ARR9_ARATH^Q:689-1411,H:1-234^61.885%ID^E:1.6e-87^RecName: Full=Two-component response regulator ARR9;^Eukaryota; Viridiplantae; Streptophyta; Embryophyta; Tracheophyta; Spermatophyta; Magnoliopsida; eudicotyledons; Gunneridae; Pentapetalae; rosids; malvids; Brassicales; Brassicaceae; Camelineae; Arabidopsis	3129	2845	2375	1137	1661	1400	2214	3821	7693	801	662	622
Pl01G0000264300.v1	Pl01	32923809	32925075	Pl01G0000264300.1.v1	238-270[+]	.	.	.	.	.	.	112	86	101	336	421	463	644	1088	2650	1350	865	806
Pl01G0000265300.v1	Pl01	33066422	33068935	Pl01G0000265300.1.v1	102-960[+]	.	GO:0051213^molecular_function^dioxygenase activity`GO:0046872^molecular_function^metal ion binding	PF14226.7^DIOX_N^non-haem dioxygenase in morphine synthesis N-terminal^24-87^E:2.4e-07`PF03171.21^2OG-FeII_Oxy^2OG-Fe(II) oxygenase superfamily^173-264^E:4.8e-17	GO:0016491^molecular_function^oxidoreductase activity`GO:0055114^biological_process^oxidation-reduction process	AOP1L_ARATH^AOP1L_ARATH^Q:123-1043,H:13-320^40.952%ID^E:4.1e-68^RecName: Full=Probable 2-oxoglutarate-dependent dioxygenase AOP1.2;^Eukaryota; Viridiplantae; Streptophyta; Embryophyta; Tracheophyta; Spermatophyta; Magnoliopsida; eudicotyledons; Gunneridae; Pentapetalae; rosids; malvids; Brassicales; Brassicaceae; Camelineae; Arabidopsis	AOP1L_ARATH^AOP1L_ARATH^Q:123-1043,H:13-320^40.952%ID^E:4.1e-68^RecName: Full=Probable 2-oxoglutarate-dependent dioxygenase AOP1.2;^Eukaryota; Viridiplantae; Streptophyta; Embryophyta; Tracheophyta; Spermatophyta; Magnoliopsida; eudicotyledons; Gunneridae; Pentapetalae; rosids; malvids; Brassicales; Brassicaceae; Camelineae; Arabidopsis	0	0	0	0	0	0	0	9	22	147	124	107
Pl01G0000268000.v1	Pl01	33397855	33401126	Pl01G0000268000.1.v1;Pl01G0000268000.2.v1	115-816[+];210-516[+]	KEGG:ath:AT4G20990`KO:K01674;KEGG:ath:AT4G20990`KO:K01674	GO:0009570^cellular_component^chloroplast stroma`GO:0009535^cellular_component^chloroplast thylakoid membrane`GO:0004089^molecular_function^carbonate dehydratase activity`GO:0016836^molecular_function^hydro-lyase activity`GO:0008270^molecular_function^zinc ion binding`GO:0006730^biological_process^one-carbon metabolic process;GO:0009570^cellular_component^chloroplast stroma`GO:0009535^cellular_co…	PF00194.22^Carb_anhydrase^Eukaryotic-type carbonic anhydrase^34-260^E:1.3e-42;PF00194.22^Carb_anhydrase^Eukaryotic-type carbonic anhydrase^17-160^E:4.4e-29	.;.	ATCA4_ARATH^ATCA4_ARATH^Q:193-900,H:28-263^51.055%ID^E:6.34e-79^RecName: Full=Alpha carbonic anhydrase 4;^Eukaryota; Viridiplantae; Streptophyta; Embryophyta; Tracheophyta; Spermatophyta; Magnoliopsida; eudicotyledons; Gunneridae; Pentapetalae; rosids; malvids; Brassicales; Brassicaceae; Camelineae; Arabidopsis;ATCA4_ARATH^ATCA4_ARATH^Q:9-695,H:36-263^51.528%ID^E:4.05e-79^RecName: Full=Alpha carb…	ATCA4_ARATH^ATCA4_ARATH^Q:193-900,H:28-263^51.055%ID^E:6.34e-79^RecName: Full=Alpha carbonic anhydrase 4;^Eukaryota; Viridiplantae; Streptophyta; Embryophyta; Tracheophyta; Spermatophyta; Magnoliopsida; eudicotyledons; Gunneridae; Pentapetalae; rosids; malvids; Brassicales; Brassicaceae; Camelineae; Arabidopsis;ATCA4_ARATH^ATCA4_ARATH^Q:9-695,H:36-263^51.528%ID^E:4.05e-79^RecName: Full=Alpha carb…	0	3	0	74	89	98	209	268	437	2576	1422	1044
Pl01G0000269200.v1	Pl01	33554729	33557721	Pl01G0000269200.1.v1	643-1593[+]	KEGG:ath:AT3G10320	GO:0005794^cellular_component^Golgi apparatus`GO:0000139^cellular_component^Golgi membrane`GO:0016021^cellular_component^integral component of membrane`GO:0047517^molecular_function^1,4-beta-D-xylan synthase activity`GO:0016757^molecular_function^transferase activity, transferring glycosyl groups`GO:0071555^biological_process^cell wall organization`GO:0010192^biological_process^mucilage biosynthe…	PF04577.15^DUF563^Protein of unknown function (DUF563)^336-455^E:2.6e-17	GO:0016757^molecular_function^transferase activity, transferring glycosyl groups	MUC21_ARATH^MUC21_ARATH^Q:931-2184,H:93-489^61.848%ID^E:1.12e-180^RecName: Full=Xylan glycosyltransferase MUCI21 {ECO:0000305};^Eukaryota; Viridiplantae; Streptophyta; Embryophyta; Tracheophyta; Spermatophyta; Magnoliopsida; eudicotyledons; Gunneridae; Pentapetalae; rosids; malvids; Brassicales; Brassicaceae; Camelineae; Arabidopsis	MUC21_ARATH^MUC21_ARATH^Q:931-2184,H:93-489^61.848%ID^E:1.12e-180^RecName: Full=Xylan glycosyltransferase MUCI21 {ECO:0000305};^Eukaryota; Viridiplantae; Streptophyta; Embryophyta; Tracheophyta; Spermatophyta; Magnoliopsida; eudicotyledons; Gunneridae; Pentapetalae; rosids; malvids; Brassicales; Brassicaceae; Camelineae; Arabidopsis	152	166	101	717	999	930	399	719	1408	542	380	323
Pl01G0000270500.v1	Pl01	33716551	33719717	Pl01G0000270500.1.v1	497-702[+]	KEGG:ath:AT2G41690`KO:K09419	GO:0005737^cellular_component^cytoplasm`GO:0042025^cellular_component^host cell nucleus`GO:0005634^cellular_component^nucleus`GO:0003700^molecular_function^DNA-binding transcription factor activity`GO:0000978^molecular_function^RNA polymerase II cis-regulatory region sequence-specific DNA binding`GO:0043565^molecular_function^sequence-specific DNA binding`GO:0034605^biological_process^cellular re…	PF00447.18^HSF_DNA-bind^HSF-type DNA-binding^22-111^E:8.9e-31	GO:0003700^molecular_function^DNA-binding transcription factor activity`GO:0043565^molecular_function^sequence-specific DNA binding`GO:0006355^biological_process^regulation of transcription, DNA-templated`GO:0005634^cellular_component^nucleus	HSFB3_ARATH^HSFB3_ARATH^Q:551-1114,H:38-244^56.039%ID^E:1.04e-60^RecName: Full=Heat stress transcription factor B-3;^Eukaryota; Viridiplantae; Streptophyta; Embryophyta; Tracheophyta; Spermatophyta; Magnoliopsida; eudicotyledons; Gunneridae; Pentapetalae; rosids; malvids; Brassicales; Brassicaceae; Camelineae; Arabidopsis	HSFB3_ARATH^HSFB3_ARATH^Q:551-1114,H:38-244^56.039%ID^E:1.04e-60^RecName: Full=Heat stress transcription factor B-3;^Eukaryota; Viridiplantae; Streptophyta; Embryophyta; Tracheophyta; Spermatophyta; Magnoliopsida; eudicotyledons; Gunneridae; Pentapetalae; rosids; malvids; Brassicales; Brassicaceae; Camelineae; Arabidopsis	8	7	10	244	328	300	93	167	384	119	166	130
Pl01G0000271100.v1	Pl01	33837861	33839281	Pl01G0000271100.1.v1;Pl01G0000271100.2.v1	42-231[+];526-204[+]	.;KEGG:ath:AT2G28760`KO:K08678	.;GO:0005737^cellular_component^cytoplasm`GO:0005777^cellular_component^peroxisome`GO:0005886^cellular_component^plasma membrane`GO:0070403^molecular_function^NAD+ binding`GO:0048040^molecular_function^UDP-glucuronate decarboxylase activity`GO:0042732^biological_process^D-xylose metabolic process`GO:0033320^biological_process^UDP-D-xylose biosynthetic process	.;.	.;.	.;UXS6_ARATH^UXS6_ARATH^Q:599-420,H:284-343^86.667%ID^E:2.09e-25^RecName: Full=UDP-glucuronic acid decarboxylase 6;^Eukaryota; Viridiplantae; Streptophyta; Embryophyta; Tracheophyta; Spermatophyta; Magnoliopsida; eudicotyledons; Gunneridae; Pentapetalae; rosids; malvids; Brassicales; Brassicaceae; Camelineae; Arabidopsis	.;UXS6_ARATH^UXS6_ARATH^Q:599-420,H:284-343^86.667%ID^E:2.09e-25^RecName: Full=UDP-glucuronic acid decarboxylase 6;^Eukaryota; Viridiplantae; Streptophyta; Embryophyta; Tracheophyta; Spermatophyta; Magnoliopsida; eudicotyledons; Gunneridae; Pentapetalae; rosids; malvids; Brassicales; Brassicaceae; Camelineae; Arabidopsis	0	0	0	0	0	7	272	377	691	429	146	190
Pl01G0000274700.v1	Pl01	34228206	34230806	Pl01G0000274700.1.v1	1-2601[+]	.	GO:0043531^molecular_function^ADP binding`GO:0005524^molecular_function^ATP binding`GO:0006952^biological_process^defense response	PF18052.2^Rx_N^Rx N-terminal domain^11-98^E:1.7e-20`PF00931.23^NB-ARC^NB-ARC domain^171-422^E:1.3e-46`PF13855.7^LRR_8^Leucine rich repeat^578-634^E:3.3e-08	GO:0043531^molecular_function^ADP binding`GO:0005515^molecular_function^protein binding	RGA4_SOLBU^RGA4_SOLBU^Q:1-1959,H:1-602^39.787%ID^E:6.39e-122^RecName: Full=Putative disease resistance protein RGA4;^Eukaryota; Viridiplantae; Streptophyta; Embryophyta; Tracheophyta; Spermatophyta; Magnoliopsida; eudicotyledons; Gunneridae; Pentapetalae; asterids; lamiids; Solanales; Solanaceae; Solanoideae; Solaneae; Solanum`RGA4_SOLBU^RGA4_SOLBU^Q:2074-2571,H:809-987^30.435%ID^E:2.7e-11^RecNam…	RGA4_SOLBU^RGA4_SOLBU^Q:1-1959,H:1-602^39.787%ID^E:6.39e-122^RecName: Full=Putative disease resistance protein RGA4;^Eukaryota; Viridiplantae; Streptophyta; Embryophyta; Tracheophyta; Spermatophyta; Magnoliopsida; eudicotyledons; Gunneridae; Pentapetalae; asterids; lamiids; Solanales; Solanaceae; Solanoideae; Solaneae; Solanum`RGA4_SOLBU^RGA4_SOLBU^Q:2074-2571,H:809-987^30.435%ID^E:2.7e-11^RecNam…	4	0	0	0	0	5	15	50	73	47	34	15
Pl01G0000275900.v1	Pl01	34312971	34315948	Pl01G0000275900.1.v1	105-2601[+]	.	GO:0043531^molecular_function^ADP binding`GO:0005524^molecular_function^ATP binding`GO:0006952^biological_process^defense response	PF18052.2^Rx_N^Rx N-terminal domain^11-98^E:2.2e-21`PF00931.23^NB-ARC^NB-ARC domain^171-401^E:1.2e-45`PF13855.7^LRR_8^Leucine rich repeat^578-634^E:3.6e-08	GO:0043531^molecular_function^ADP binding`GO:0005515^molecular_function^protein binding	RGA1_SOLBU^RGA1_SOLBU^Q:105-2474,H:1-743^35.142%ID^E:4.83e-111^RecName: Full=Putative disease resistance protein RGA1;^Eukaryota; Viridiplantae; Streptophyta; Embryophyta; Tracheophyta; Spermatophyta; Magnoliopsida; eudicotyledons; Gunneridae; Pentapetalae; asterids; lamiids; Solanales; Solanaceae; Solanoideae; Solaneae; Solanum	RGA1_SOLBU^RGA1_SOLBU^Q:105-2474,H:1-743^35.142%ID^E:4.83e-111^RecName: Full=Putative disease resistance protein RGA1;^Eukaryota; Viridiplantae; Streptophyta; Embryophyta; Tracheophyta; Spermatophyta; Magnoliopsida; eudicotyledons; Gunneridae; Pentapetalae; asterids; lamiids; Solanales; Solanaceae; Solanoideae; Solaneae; Solanum	2	0	0	0	3	0	188	366	635	175	100	91
Pl01G0000276700.v1	Pl01	34369760	34370453	Pl01G0000276700.1.v1	342-303[+]	.	.	.	.	.	.	171	184	183	11	34	23	120	219	435	47	40	31
Pl01G0000276800.v1	Pl01	34374741	34377566	Pl01G0000276800.1.v1;Pl01G0000276800.2.v1;Pl01G0000276800.3.v1	82-1371[+];82-1380[+];82-1053[+]	.;.;.	GO:0005618^cellular_component^cell wall`GO:0005576^cellular_component^extracellular region`GO:0004650^molecular_function^polygalacturonase activity`GO:0005975^biological_process^carbohydrate metabolic process`GO:0071555^biological_process^cell wall organization`GO:0009835^biological_process^fruit ripening;GO:0005618^cellular_component^cell wall`GO:0005576^cellular_component^extracellular region`G…	PF12708.8^Pectate_lyase_3^Pectate lyase superfamily protein^74-295^E:4.3e-07`PF00295.18^Glyco_hydro_28^Glycosyl hydrolases family 28^106-428^E:6.4e-105;PF12708.8^Pectate_lyase_3^Pectate lyase superfamily protein^74-295^E:2.6e-07`PF00295.18^Glyco_hydro_28^Glycosyl hydrolases family 28^106-431^E:2.3e-103;PF12708.8^Pectate_lyase_3^Pectate lyase superfamily protein^74-295^E:1.6e-07`PF00295.18^Glyco_h…	GO:0004650^molecular_function^polygalacturonase activity`GO:0005975^biological_process^carbohydrate metabolic process;GO:0004650^molecular_function^polygalacturonase activity`GO:0005975^biological_process^carbohydrate metabolic process;GO:0004650^molecular_function^polygalacturonase activity`GO:0005975^biological_process^carbohydrate metabolic process	PGLR_ACTDE^PGLR_ACTDE^Q:292-1398,H:88-455^65.405%ID^E:3.8e-168^RecName: Full=Polygalacturonase;^Eukaryota; Viridiplantae; Streptophyta; Embryophyta; Tracheophyta; Spermatophyta; Magnoliopsida; eudicotyledons; Gunneridae; Pentapetalae; asterids; Ericales; Actinidiaceae; Actinidia;PGLR_ACTDE^PGLR_ACTDE^Q:292-1407,H:88-455^64.611%ID^E:1.57e-168^RecName: Full=Polygalacturonase;^Eukaryota; Viridiplant…	PGLR_ACTDE^PGLR_ACTDE^Q:292-1398,H:88-455^65.405%ID^E:3.8e-168^RecName: Full=Polygalacturonase;^Eukaryota; Viridiplantae; Streptophyta; Embryophyta; Tracheophyta; Spermatophyta; Magnoliopsida; eudicotyledons; Gunneridae; Pentapetalae; asterids; Ericales; Actinidiaceae; Actinidia;PGLR_ACTDE^PGLR_ACTDE^Q:292-1407,H:88-455^64.611%ID^E:1.57e-168^RecName: Full=Polygalacturonase;^Eukaryota; Viridiplant…	8	0	26	927	921	1225	6961	10694	21380	9943	6654	5696
Pl01G0000280600.v1	Pl01	34841675	34844750	Pl01G0000280600.1.v1	377-1191[+]	KEGG:ath:AT2G42280	GO:0005634^cellular_component^nucleus`GO:0003677^molecular_function^DNA binding`GO:0001228^molecular_function^DNA-binding transcription activator activity, RNA polymerase II-specific`GO:0003700^molecular_function^DNA-binding transcription factor activity`GO:0046983^molecular_function^protein dimerization activity`GO:0048573^biological_process^photoperiodism, flowering`GO:0006355^biological_proces…	PF00010.27^HLH^Helix-loop-helix DNA-binding domain^324-369^E:3.6e-10	GO:0046983^molecular_function^protein dimerization activity	BH130_ARATH^BH130_ARATH^Q:377-1543,H:1-356^39.372%ID^E:4.23e-53^RecName: Full=Transcription factor bHLH130;^Eukaryota; Viridiplantae; Streptophyta; Embryophyta; Tracheophyta; Spermatophyta; Magnoliopsida; eudicotyledons; Gunneridae; Pentapetalae; rosids; malvids; Brassicales; Brassicaceae; Camelineae; Arabidopsis	BH130_ARATH^BH130_ARATH^Q:377-1543,H:1-356^39.372%ID^E:4.23e-53^RecName: Full=Transcription factor bHLH130;^Eukaryota; Viridiplantae; Streptophyta; Embryophyta; Tracheophyta; Spermatophyta; Magnoliopsida; eudicotyledons; Gunneridae; Pentapetalae; rosids; malvids; Brassicales; Brassicaceae; Camelineae; Arabidopsis	0	34	4	18	11	9	23	27	108	216	85	82
Pl01G0000281000.v1	Pl01	34872848	34874653	Pl01G0000281000.1.v1	1-1551[+]	KEGG:gmx:100776878`KO:K13261	GO:0016020^cellular_component^membrane`GO:0047082^molecular_function^3,9-dihydroxypterocarpan 6a-monooxygenase activity`GO:0020037^molecular_function^heme binding`GO:0005506^molecular_function^iron ion binding`GO:0016709^molecular_function^oxidoreductase activity, acting on paired donors, with incorporation or reduction of molecular oxygen, NAD(P)H as one donor, and incorporation of one atom of o…	PF00067.23^p450^Cytochrome P450^36-502^E:2.7e-105	GO:0005506^molecular_function^iron ion binding`GO:0016705^molecular_function^oxidoreductase activity, acting on paired donors, with incorporation or reduction of molecular oxygen`GO:0020037^molecular_function^heme binding`GO:0055114^biological_process^oxidation-reduction process	C93A1_SOYBN^C93A1_SOYBN^Q:31-1548,H:5-509^65.029%ID^E:0^RecName: Full=3,9-dihydroxypterocarpan 6A-monooxygenase;^Eukaryota; Viridiplantae; Streptophyta; Embryophyta; Tracheophyta; Spermatophyta; Magnoliopsida; eudicotyledons; Gunneridae; Pentapetalae; rosids; fabids; Fabales; Fabaceae; Papilionoideae; 50 kb inversion clade; NPAAA clade; indigoferoid/millettioid clade; Phaseoleae; Glycine; Glycine…	C93A1_SOYBN^C93A1_SOYBN^Q:31-1548,H:5-509^65.029%ID^E:0^RecName: Full=3,9-dihydroxypterocarpan 6A-monooxygenase;^Eukaryota; Viridiplantae; Streptophyta; Embryophyta; Tracheophyta; Spermatophyta; Magnoliopsida; eudicotyledons; Gunneridae; Pentapetalae; rosids; fabids; Fabales; Fabaceae; Papilionoideae; 50 kb inversion clade; NPAAA clade; indigoferoid/millettioid clade; Phaseoleae; Glycine; Glycine…	0	0	0	0	0	0	62	141	436	4	12	11
Pl01G0000281500.v1	Pl01	34914999	34916015	Pl01G0000281500.1.v1	1-1017[+]	KEGG:ath:AT4G36810`KO:K13789	GO:0009507^cellular_component^chloroplast`GO:0005829^cellular_component^cytosol`GO:0009513^cellular_component^etioplast`GO:0009536^cellular_component^plastid`GO:0004161^molecular_function^dimethylallyltranstransferase activity`GO:0004311^molecular_function^farnesyltranstransferase activity`GO:0004337^molecular_function^geranyltranstransferase activity`GO:0046872^molecular_function^metal ion bindi…	PF00348.18^polyprenyl_synt^Polyprenyl synthetase^71-306^E:1.4e-50	GO:0008299^biological_process^isoprenoid biosynthetic process	GGPP1_ARATH^GGPP1_ARATH^Q:91-1014,H:61-371^65.916%ID^E:1.26e-133^RecName: Full=Heterodimeric geranylgeranyl pyrophosphate synthase large subunit 1, chloroplastic;^Eukaryota; Viridiplantae; Streptophyta; Embryophyta; Tracheophyta; Spermatophyta; Magnoliopsida; eudicotyledons; Gunneridae; Pentapetalae; rosids; malvids; Brassicales; Brassicaceae; Camelineae; Arabidopsis	GGPP1_ARATH^GGPP1_ARATH^Q:91-1014,H:61-371^65.916%ID^E:1.26e-133^RecName: Full=Heterodimeric geranylgeranyl pyrophosphate synthase large subunit 1, chloroplastic;^Eukaryota; Viridiplantae; Streptophyta; Embryophyta; Tracheophyta; Spermatophyta; Magnoliopsida; eudicotyledons; Gunneridae; Pentapetalae; rosids; malvids; Brassicales; Brassicaceae; Camelineae; Arabidopsis	41	16	29	19	13	35	78	75	153	1	7	8
Pl01G0000281800.v1	Pl01	34929699	34930697	Pl01G0000281800.1.v1	1-999[+]	.	GO:0048046^cellular_component^apoplast`GO:0005618^cellular_component^cell wall	PF08263.13^LRRNT_2^Leucine rich repeat N-terminal domain^26-62^E:1.1e-11`PF13516.7^LRR_6^Leucine Rich repeat^119-134^E:14`PF00560.34^LRR_1^Leucine Rich Repeat^121-139^E:7.9`PF13516.7^LRR_6^Leucine Rich repeat^143-158^E:0.54`PF00560.34^LRR_1^Leucine Rich Repeat^145-167^E:0.2`PF13516.7^LRR_6^Leucine Rich repeat^168-182^E:160`PF00560.34^LRR_1^Leucine Rich Repeat^169-191^E:5`PF00560.34^LRR_1^Leucine …	GO:0005515^molecular_function^protein binding	PGIP_PYRCO^PGIP_PYRCO^Q:28-993,H:11-329^68.519%ID^E:4.77e-142^RecName: Full=Polygalacturonase inhibitor;^Eukaryota; Viridiplantae; Streptophyta; Embryophyta; Tracheophyta; Spermatophyta; Magnoliopsida; eudicotyledons; Gunneridae; Pentapetalae; rosids; fabids; Rosales; Rosaceae; Amygdaloideae; Maleae; Pyrus	PGIP_PYRCO^PGIP_PYRCO^Q:28-993,H:11-329^68.519%ID^E:4.77e-142^RecName: Full=Polygalacturonase inhibitor;^Eukaryota; Viridiplantae; Streptophyta; Embryophyta; Tracheophyta; Spermatophyta; Magnoliopsida; eudicotyledons; Gunneridae; Pentapetalae; rosids; fabids; Rosales; Rosaceae; Amygdaloideae; Maleae; Pyrus	5	4	2	368	651	593	1305	1698	3781	1394	952	781
Pl01G0000282600.v1	Pl01	35034161	35037343	Pl01G0000282600.1.v1	110-714[+]	KEGG:ath:AT2G42220	GO:0009507^cellular_component^chloroplast`GO:0009534^cellular_component^chloroplast thylakoid`GO:0009535^cellular_component^chloroplast thylakoid membrane`GO:0005829^cellular_component^cytosol`GO:0016021^cellular_component^integral component of membrane	PF00581.21^Rhodanese^Rhodanese-like domain^55-175^E:1.5e-09	.	STR9_ARATH^STR9_ARATH^Q:134-802,H:10-230^65.919%ID^E:1.32e-102^RecName: Full=Rhodanese-like domain-containing protein 9, chloroplastic;^Eukaryota; Viridiplantae; Streptophyta; Embryophyta; Tracheophyta; Spermatophyta; Magnoliopsida; eudicotyledons; Gunneridae; Pentapetalae; rosids; malvids; Brassicales; Brassicaceae; Camelineae; Arabidopsis	STR9_ARATH^STR9_ARATH^Q:134-802,H:10-230^65.919%ID^E:1.32e-102^RecName: Full=Rhodanese-like domain-containing protein 9, chloroplastic;^Eukaryota; Viridiplantae; Streptophyta; Embryophyta; Tracheophyta; Spermatophyta; Magnoliopsida; eudicotyledons; Gunneridae; Pentapetalae; rosids; malvids; Brassicales; Brassicaceae; Camelineae; Arabidopsis	6645	5679	6065	1090	1803	1400	6643	9819	20647	3181	2476	2366
Pl01G0000283000.v1	Pl01	35051520	35056116	Pl01G0000283000.1.v1	485-1089[+]	KEGG:ath:AT2G42200	GO:0005737^cellular_component^cytoplasm`GO:0042025^cellular_component^host cell nucleus`GO:0005634^cellular_component^nucleus`GO:0003677^molecular_function^DNA binding`GO:0003700^molecular_function^DNA-binding transcription factor activity`GO:0046872^molecular_function^metal ion binding`GO:0048653^biological_process^anther development`GO:0048366^biological_process^leaf development`GO:2000025^biol…	PF03110.15^SBP^SBP domain^73-146^E:2.3e-32	GO:0003677^molecular_function^DNA binding`GO:0005634^cellular_component^nucleus	SPL9_ARATH^SPL9_ARATH^Q:539-1570,H:32-375^45.161%ID^E:8.07e-57^RecName: Full=Squamosa promoter-binding-like protein 9;^Eukaryota; Viridiplantae; Streptophyta; Embryophyta; Tracheophyta; Spermatophyta; Magnoliopsida; eudicotyledons; Gunneridae; Pentapetalae; rosids; malvids; Brassicales; Brassicaceae; Camelineae; Arabidopsis	SPL9_ARATH^SPL9_ARATH^Q:539-1570,H:32-375^45.161%ID^E:8.07e-57^RecName: Full=Squamosa promoter-binding-like protein 9;^Eukaryota; Viridiplantae; Streptophyta; Embryophyta; Tracheophyta; Spermatophyta; Magnoliopsida; eudicotyledons; Gunneridae; Pentapetalae; rosids; malvids; Brassicales; Brassicaceae; Camelineae; Arabidopsis	7484	5641	5481	1353	2034	1990	3131	5199	12347	990	739	766
Pl01G0000283400.v1	Pl01	35102627	35102893	Pl01G0000283400.1.v1	1-267[+]	.	.	.	.	.	.	406	315	391	157	126	158	230	280	654	17	42	26
Pl01G0000283500.v1	Pl01	35113627	35114921	Pl01G0000283500.1.v1	257-588[+]	.	.	PF05553.12^DUF761^Cotton fibre expressed protein^159-193^E:3.2e-14	.	.	.	689	581	645	188	331	235	715	1144	2008	255	147	184
Pl01G0000283900.v1	Pl01	35168446	35168863	Pl01G0000283900.1.v1	269-150[+]	.	.	.	.	.	.	0	0	0	1	0	0	179	151	500	190	145	203
Pl01G0000284100.v1	Pl01	35192997	35193710	Pl01G0000284100.1.v1	72-288[+]	KEGG:gmx:547828	GO:0048030^molecular_function^disaccharide binding`GO:0070492^molecular_function^oligosaccharide binding`GO:0031210^molecular_function^phosphatidylcholine binding`GO:0009793^biological_process^embryo development ending in seed dormancy	PF03760.16^LEA_1^Late embryogenesis abundant (LEA) group 1^9-78^E:5.1e-24	GO:0009793^biological_process^embryo development ending in seed dormancy	PM1_SOYBN^PM1_SOYBN^Q:72-422,H:1-137^62.774%ID^E:1.58e-41^RecName: Full=18 kDa seed maturation protein;^Eukaryota; Viridiplantae; Streptophyta; Embryophyta; Tracheophyta; Spermatophyta; Magnoliopsida; eudicotyledons; Gunneridae; Pentapetalae; rosids; fabids; Fabales; Fabaceae; Papilionoideae; 50 kb inversion clade; NPAAA clade; indigoferoid/millettioid clade; Phaseoleae; Glycine; Glycine subgen. …	PM1_SOYBN^PM1_SOYBN^Q:72-422,H:1-137^62.774%ID^E:1.58e-41^RecName: Full=18 kDa seed maturation protein;^Eukaryota; Viridiplantae; Streptophyta; Embryophyta; Tracheophyta; Spermatophyta; Magnoliopsida; eudicotyledons; Gunneridae; Pentapetalae; rosids; fabids; Fabales; Fabaceae; Papilionoideae; 50 kb inversion clade; NPAAA clade; indigoferoid/millettioid clade; Phaseoleae; Glycine; Glycine subgen. …	162	91	128	80	103	37	51	163	269	27461	7964	11482
Pl01G0000284200.v1	Pl01	35198148	35198910	Pl01G0000284200.1.v1	73-468[+]	KEGG:gmx:547828	GO:0048030^molecular_function^disaccharide binding`GO:0070492^molecular_function^oligosaccharide binding`GO:0031210^molecular_function^phosphatidylcholine binding`GO:0009793^biological_process^embryo development ending in seed dormancy	PF03760.16^LEA_1^Late embryogenesis abundant (LEA) group 1^9-78^E:1.3e-23	GO:0009793^biological_process^embryo development ending in seed dormancy	PM1_SOYBN^PM1_SOYBN^Q:73-489,H:1-159^74.843%ID^E:6.44e-72^RecName: Full=18 kDa seed maturation protein;^Eukaryota; Viridiplantae; Streptophyta; Embryophyta; Tracheophyta; Spermatophyta; Magnoliopsida; eudicotyledons; Gunneridae; Pentapetalae; rosids; fabids; Fabales; Fabaceae; Papilionoideae; 50 kb inversion clade; NPAAA clade; indigoferoid/millettioid clade; Phaseoleae; Glycine; Glycine subgen. …	PM1_SOYBN^PM1_SOYBN^Q:73-489,H:1-159^74.843%ID^E:6.44e-72^RecName: Full=18 kDa seed maturation protein;^Eukaryota; Viridiplantae; Streptophyta; Embryophyta; Tracheophyta; Spermatophyta; Magnoliopsida; eudicotyledons; Gunneridae; Pentapetalae; rosids; fabids; Fabales; Fabaceae; Papilionoideae; 50 kb inversion clade; NPAAA clade; indigoferoid/millettioid clade; Phaseoleae; Glycine; Glycine subgen. …	426	456	461	435	711	426	394	670	1481	56680	19025	24269
Pl01G0000284500.v1	Pl01	35226339	35227899	Pl01G0000284500.1.v1	222-351[+]	.	.	.	.	.	.	423	349	354	59	116	102	324	538	1110	416	265	296
Pl01G0000284600.v1	Pl01	35232563	35235244	Pl01G0000284600.1.v1;Pl01G0000284600.2.v1	64-1152[+];61-1089[+]	KEGG:osa:9272700`KO:K01102;KEGG:osa:9272700`KO:K01102	GO:0004724^molecular_function^magnesium-dependent protein serine/threonine phosphatase activity`GO:0046872^molecular_function^metal ion binding`GO:0004722^molecular_function^protein serine/threonine phosphatase activity;GO:0004724^molecular_function^magnesium-dependent protein serine/threonine phosphatase activity`GO:0046872^molecular_function^metal ion binding`GO:0004722^molecular_function^prote…	PF00481.22^PP2C^Protein phosphatase 2C^74-318^E:5.4e-36;PF00481.22^PP2C^Protein phosphatase 2C^75-297^E:2.1e-31	GO:0003824^molecular_function^catalytic activity;GO:0003824^molecular_function^catalytic activity	P2C43_ORYSJ^P2C43_ORYSJ^Q:70-1197,H:1-384^57.031%ID^E:1.81e-162^RecName: Full=Probable protein phosphatase 2C 43;^Eukaryota; Viridiplantae; Streptophyta; Embryophyta; Tracheophyta; Spermatophyta; Magnoliopsida; Liliopsida; Poales; Poaceae; BOP clade; Oryzoideae; Oryzeae; Oryzinae; Oryza; Oryza sativa;P2C43_ORYSJ^P2C43_ORYSJ^Q:67-1131,H:1-384^54.427%ID^E:8.48e-151^RecName: Full=Probable protein ph…	P2C43_ORYSJ^P2C43_ORYSJ^Q:70-1197,H:1-384^57.031%ID^E:1.81e-162^RecName: Full=Probable protein phosphatase 2C 43;^Eukaryota; Viridiplantae; Streptophyta; Embryophyta; Tracheophyta; Spermatophyta; Magnoliopsida; Liliopsida; Poales; Poaceae; BOP clade; Oryzoideae; Oryzeae; Oryzinae; Oryza; Oryza sativa;P2C43_ORYSJ^P2C43_ORYSJ^Q:67-1131,H:1-384^54.427%ID^E:8.48e-151^RecName: Full=Probable protein ph…	0	9	10	69	203	137	85	73	99	456	361	258
Pl01G0000285700.v1	Pl01	35353869	35354921	Pl01G0000285700.1.v1	1-882[+]	.	GO:0005634^cellular_component^nucleus`GO:0043565^molecular_function^sequence-specific DNA binding`GO:0006355^biological_process^regulation of transcription, DNA-templated	PF04618.13^HD-ZIP_N^HD-ZIP protein N terminus^37-114^E:0.0001`PF00046.30^Homeodomain^Homeodomain^139-193^E:1.3e-14`PF02183.19^HALZ^Homeobox associated leucine zipper^195-229^E:1.1e-10	GO:0005634^cellular_component^nucleus`GO:0003677^molecular_function^DNA binding`GO:0003700^molecular_function^DNA-binding transcription factor activity`GO:0043565^molecular_function^sequence-specific DNA binding`GO:0006355^biological_process^regulation of transcription, DNA-templated	HOX11_ORYSI^HOX11_ORYSI^Q:376-756,H:76-202^82.677%ID^E:9.22e-70^RecName: Full=Homeobox-leucine zipper protein HOX11;^Eukaryota; Viridiplantae; Streptophyta; Embryophyta; Tracheophyta; Spermatophyta; Magnoliopsida; Liliopsida; Poales; Poaceae; BOP clade; Oryzoideae; Oryzeae; Oryzinae; Oryza; Oryza sativa	HOX11_ORYSI^HOX11_ORYSI^Q:376-756,H:76-202^82.677%ID^E:9.22e-70^RecName: Full=Homeobox-leucine zipper protein HOX11;^Eukaryota; Viridiplantae; Streptophyta; Embryophyta; Tracheophyta; Spermatophyta; Magnoliopsida; Liliopsida; Poales; Poaceae; BOP clade; Oryzoideae; Oryzeae; Oryzinae; Oryza; Oryza sativa	602	461	402	31	96	78	343	499	1012	21	13	17
Pl01G0000287000.v1	Pl01	35457601	35458068	Pl01G0000287000.1.v1	1-468[+]	.	.	.	.	.	.	0	0	0	41	120	79	1	9	60	230	146	128
Pl01G0000288000.v1	Pl01	35658360	35672358	Pl01G0000288000.2.v1;Pl01G0000288000.3.v1;Pl01G0000288000.4.v1;Pl01G0000288000.1.v1;Pl01G0000288000.5.v1;Pl01G0000288000.6.v1;Pl01G0000288000.7.v1	60-648[+];60-810[+];60-828[+];60-648[+];128-450[+];36-648[+];46-648[+]	.;.;.;.;.;.;.	GO:0048046^cellular_component^apoplast`GO:0016829^molecular_function^lyase activity`GO:0006952^biological_process^defense response;GO:0048046^cellular_component^apoplast`GO:0016829^molecular_function^lyase activity`GO:0006952^biological_process^defense response;GO:0048046^cellular_component^apoplast`GO:0016829^molecular_function^lyase activity`GO:0006952^biological_process^defense response;GO:004…	PF03018.15^Dirigent^Dirigent-like protein^41-186^E:3e-47;PF03018.15^Dirigent^Dirigent-like protein^41-168^E:3.4e-41`PF03018.15^Dirigent^Dirigent-like protein^168-240^E:2e-24;PF03018.15^Dirigent^Dirigent-like protein^41-172^E:6.9e-42`PF03018.15^Dirigent^Dirigent-like protein^174-246^E:4.1e-24;PF03018.15^Dirigent^Dirigent-like protein^41-186^E:3e-47;PF03018.15^Dirigent^Dirigent-like protein^3-120^E…	.;.;.;.;.;.;.	DIR_GLYEC^DIR_GLYEC^Q:60-617,H:1-185^51.596%ID^E:2.19e-50^RecName: Full=Pterocarpan synthase 1 {ECO:0000303|PubMed:28394400};^Eukaryota; Viridiplantae; Streptophyta; Embryophyta; Tracheophyta; Spermatophyta; Magnoliopsida; eudicotyledons; Gunneridae; Pentapetalae; rosids; fabids; Fabales; Fabaceae; Papilionoideae; 50 kb inversion clade; NPAAA clade; Hologalegina; IRL clade; Galegeae; Glycyrrhiza;…	DIR_GLYEC^DIR_GLYEC^Q:60-617,H:1-185^51.596%ID^E:2.19e-50^RecName: Full=Pterocarpan synthase 1 {ECO:0000303|PubMed:28394400};^Eukaryota; Viridiplantae; Streptophyta; Embryophyta; Tracheophyta; Spermatophyta; Magnoliopsida; eudicotyledons; Gunneridae; Pentapetalae; rosids; fabids; Fabales; Fabaceae; Papilionoideae; 50 kb inversion clade; NPAAA clade; Hologalegina; IRL clade; Galegeae; Glycyrrhiza;…	27	14	35	1066	1473	1182	1585	2299	5258	1137	841	610
Pl01G0000289300.v1	Pl01	35788061	35794610	Pl01G0000289300.1.v1	250-1422[+]	KEGG:ath:AT2G48020	GO:0005829^cellular_component^cytosol`GO:0005887^cellular_component^integral component of plasma membrane`GO:0009705^cellular_component^plant-type vacuole membrane`GO:0005774^cellular_component^vacuolar membrane`GO:0005773^cellular_component^vacuole`GO:0005351^molecular_function^carbohydrate:proton symporter activity`GO:0046323^biological_process^glucose import`GO:0006829^biological_process^zinc …	PF00083.25^Sugar_tr^Sugar (and other) transporter^48-469^E:1.4e-89`PF07690.17^MFS_1^Major Facilitator Superfamily^58-419^E:5.6e-28	GO:0022857^molecular_function^transmembrane transporter activity`GO:0055085^biological_process^transmembrane transport`GO:0016021^cellular_component^integral component of membrane	ERDL7_ARATH^ERDL7_ARATH^Q:280-1665,H:5-462^69.048%ID^E:0^RecName: Full=Sugar transporter ERD6-like 7;^Eukaryota; Viridiplantae; Streptophyta; Embryophyta; Tracheophyta; Spermatophyta; Magnoliopsida; eudicotyledons; Gunneridae; Pentapetalae; rosids; malvids; Brassicales; Brassicaceae; Camelineae; Arabidopsis	ERDL7_ARATH^ERDL7_ARATH^Q:280-1665,H:5-462^69.048%ID^E:0^RecName: Full=Sugar transporter ERD6-like 7;^Eukaryota; Viridiplantae; Streptophyta; Embryophyta; Tracheophyta; Spermatophyta; Magnoliopsida; eudicotyledons; Gunneridae; Pentapetalae; rosids; malvids; Brassicales; Brassicaceae; Camelineae; Arabidopsis	226	174	288	3611	5114	4849	2105	3068	6023	4747	3473	3071
Pl01G0000289400.v1	Pl01	35791747	35795450	Pl01G0000289400.1.v1;Pl01G0000289400.2.v1;Pl01G0000289400.3.v1	329-1182[+];453-1257[+];206-1725[+]	.;.;.	GO:0005737^cellular_component^cytoplasm`GO:0016881^molecular_function^acid-amino acid ligase activity`GO:0009733^biological_process^response to auxin`GO:0009416^biological_process^response to light stimulus;GO:0005737^cellular_component^cytoplasm`GO:0016881^molecular_function^acid-amino acid ligase activity`GO:0009733^biological_process^response to auxin`GO:0009416^biological_process^response to …	PF03321.14^GH3^GH3 auxin-responsive promoter^15-354^E:1.5e-103;PF03321.14^GH3^GH3 auxin-responsive promoter^15-235^E:2e-64`PF03321.14^GH3^GH3 auxin-responsive promoter^235-400^E:1.1e-35;PF03321.14^GH3^GH3 auxin-responsive promoter^11-556^E:2.1e-149	.;.;.	GH36_ORYSJ^GH36_ORYSJ^Q:440-1501,H:1-401^41.076%ID^E:3.51e-93^RecName: Full=Probable indole-3-acetic acid-amido synthetase GH3.6;^Eukaryota; Viridiplantae; Streptophyta; Embryophyta; Tracheophyta; Spermatophyta; Magnoliopsida; Liliopsida; Poales; Poaceae; BOP clade; Oryzoideae; Oryzeae; Oryzinae; Oryza; Oryza sativa;GH36_ORYSJ^GH36_ORYSJ^Q:564-1637,H:1-401^41.626%ID^E:1.55e-95^RecName: Full=Proba…	GH36_ORYSJ^GH36_ORYSJ^Q:440-1501,H:1-401^41.076%ID^E:3.51e-93^RecName: Full=Probable indole-3-acetic acid-amido synthetase GH3.6;^Eukaryota; Viridiplantae; Streptophyta; Embryophyta; Tracheophyta; Spermatophyta; Magnoliopsida; Liliopsida; Poales; Poaceae; BOP clade; Oryzoideae; Oryzeae; Oryzinae; Oryza; Oryza sativa;GH36_ORYSJ^GH36_ORYSJ^Q:564-1637,H:1-401^41.626%ID^E:1.55e-95^RecName: Full=Proba…	138	147	136	559	671	593	199	452	1050	252	432	203
Pl01G0000293100.v1	Pl01	36109356	36112484	Pl01G0000293100.1.v1	3-216[+]	.	.	.	.	.	.	197	83	88	146	143	203	18	12	60	33	34	40
Pl01G0000293600.v1	Pl01	36171971	36174014	Pl01G0000293600.1.v1	317-984[+]	KEGG:ath:AT1G03170	GO:0010075^biological_process^regulation of meristem growth	PF11250.9^FAF^Fantastic Four meristem regulator^185-237^E:1.2e-15	.	FAF2_ARATH^FAF2_ARATH^Q:560-1027,H:22-171^38.854%ID^E:4.73e-17^RecName: Full=Protein FANTASTIC FOUR 2;^Eukaryota; Viridiplantae; Streptophyta; Embryophyta; Tracheophyta; Spermatophyta; Magnoliopsida; eudicotyledons; Gunneridae; Pentapetalae; rosids; malvids; Brassicales; Brassicaceae; Camelineae; Arabidopsis	FAF2_ARATH^FAF2_ARATH^Q:560-1027,H:22-171^38.854%ID^E:4.73e-17^RecName: Full=Protein FANTASTIC FOUR 2;^Eukaryota; Viridiplantae; Streptophyta; Embryophyta; Tracheophyta; Spermatophyta; Magnoliopsida; eudicotyledons; Gunneridae; Pentapetalae; rosids; malvids; Brassicales; Brassicaceae; Camelineae; Arabidopsis	87	109	85	47	53	37	102	127	321	4	7	0
Pl01G0000294400.v1	Pl01	36264490	36266375	Pl01G0000294400.1.v1	465-1125[+]	KEGG:ath:AT3G63200	GO:0016787^molecular_function^hydrolase activity`GO:0016042^biological_process^lipid catabolic process	PF01734.23^Patatin^Patatin-like phospholipase^31-233^E:8.9e-27	GO:0006629^biological_process^lipid metabolic process	PLP9_ARATH^PLP9_ARATH^Q:465-1565,H:3-373^68.901%ID^E:1.19e-172^RecName: Full=Probable inactive patatin-like protein 9;^Eukaryota; Viridiplantae; Streptophyta; Embryophyta; Tracheophyta; Spermatophyta; Magnoliopsida; eudicotyledons; Gunneridae; Pentapetalae; rosids; malvids; Brassicales; Brassicaceae; Camelineae; Arabidopsis	PLP9_ARATH^PLP9_ARATH^Q:465-1565,H:3-373^68.901%ID^E:1.19e-172^RecName: Full=Probable inactive patatin-like protein 9;^Eukaryota; Viridiplantae; Streptophyta; Embryophyta; Tracheophyta; Spermatophyta; Magnoliopsida; eudicotyledons; Gunneridae; Pentapetalae; rosids; malvids; Brassicales; Brassicaceae; Camelineae; Arabidopsis	1747	1625	1524	292	498	444	1033	1549	3413	740	476	351
Pl01G0000296200.v1	Pl01	36455939	36456368	Pl01G0000296200.1.v1	1-306[+]	.	.	.	.	.	.	16	9	26	99	156	161	19	8	30	39	30	39
Pl01G0000296700.v1	Pl01	36516610	36518270	Pl01G0000296700.1.v1	1-972[+]	KEGG:ath:AT3G63210	GO:0010494^cellular_component^cytoplasmic stress granule`GO:0005634^cellular_component^nucleus`GO:0000932^cellular_component^P-body`GO:0019900^molecular_function^kinase binding`GO:0046872^molecular_function^metal ion binding`GO:0009737^biological_process^response to abscisic acid`GO:0009749^biological_process^response to glucose`GO:1905582^biological_process^response to mannose`GO:0009744^biologi…	PF04570.15^zf-FLZ^zinc-finger of the FCS-type, C2-C2^262-310^E:7.7e-21	.	MARD1_ARATH^MARD1_ARATH^Q:139-939,H:1-262^41.754%ID^E:1.99e-43^RecName: Full=Protein MARD1 {ECO:0000303|PubMed:15159630};^Eukaryota; Viridiplantae; Streptophyta; Embryophyta; Tracheophyta; Spermatophyta; Magnoliopsida; eudicotyledons; Gunneridae; Pentapetalae; rosids; malvids; Brassicales; Brassicaceae; Camelineae; Arabidopsis	MARD1_ARATH^MARD1_ARATH^Q:139-939,H:1-262^41.754%ID^E:1.99e-43^RecName: Full=Protein MARD1 {ECO:0000303|PubMed:15159630};^Eukaryota; Viridiplantae; Streptophyta; Embryophyta; Tracheophyta; Spermatophyta; Magnoliopsida; eudicotyledons; Gunneridae; Pentapetalae; rosids; malvids; Brassicales; Brassicaceae; Camelineae; Arabidopsis	65	79	68	2382	3509	3158	1525	2445	5052	4670	3300	3224
Pl01G0000298000.v1	Pl01	36673444	36677595	Pl01G0000298000.1.v1	345-1452[+]	KEGG:ath:AT3G63300	GO:0009734^biological_process^auxin-activated signaling pathway`GO:0010305^biological_process^leaf vascular tissue pattern formation`GO:0010087^biological_process^phloem or xylem histogenesis`GO:0009733^biological_process^response to auxin	PF05703.12^Auxin_canalis^Auxin canalisation^20-322^E:2.6e-108`PF08458.11^PH_2^Plant pleckstrin homology-like region^369-474^E:2.6e-41	.	VAB_ARATH^VAB_ARATH^Q:393-1784,H:27-489^66.737%ID^E:2.05e-143^RecName: Full=VAN3-binding protein {ECO:0000303|PubMed:19363154};^Eukaryota; Viridiplantae; Streptophyta; Embryophyta; Tracheophyta; Spermatophyta; Magnoliopsida; eudicotyledons; Gunneridae; Pentapetalae; rosids; malvids; Brassicales; Brassicaceae; Camelineae; Arabidopsis	VAB_ARATH^VAB_ARATH^Q:393-1784,H:27-489^66.737%ID^E:2.05e-143^RecName: Full=VAN3-binding protein {ECO:0000303|PubMed:19363154};^Eukaryota; Viridiplantae; Streptophyta; Embryophyta; Tracheophyta; Spermatophyta; Magnoliopsida; eudicotyledons; Gunneridae; Pentapetalae; rosids; malvids; Brassicales; Brassicaceae; Camelineae; Arabidopsis	997	976	1040	182	225	188	450	916	1642	225	175	147
Pl01G0000299200.v1	Pl01	36783898	36788947	Pl01G0000299200.1.v1;Pl01G0000299200.2.v1	134-3153[+];3-1731[+]	KEGG:ath:AT3G63380`KO:K01537;KEGG:ath:AT3G63380`KO:K01537	GO:0016021^cellular_component^integral component of membrane`GO:0043231^cellular_component^intracellular membrane-bounded organelle`GO:0005524^molecular_function^ATP binding`GO:0019829^molecular_function^ATPase-coupled cation transmembrane transporter activity`GO:0005388^molecular_function^calcium transmembrane transporter activity, phosphorylative mechanism`GO:0005516^molecular_function^calmodul…	PF00690.27^Cation_ATPase_N^Cation transporter/ATPase, N-terminus^120-187^E:9.8e-11`PF00122.21^E1-E2_ATPase^E1-E2 ATPase^239-441^E:9e-40`PF00702.27^Hydrolase^haloacid dehalogenase-like hydrolase^461-784^E:1.9e-18`PF13246.7^Cation_ATPase^Cation transport ATPase (P-type)^516-599^E:8.2e-16`PF00689.22^Cation_ATPase_C^Cation transporting ATPase, C-terminus^855-1025^E:5.4e-48;PF13246.7^Cation_ATPase^Cat…	.;.	ACA12_ARATH^ACA12_ARATH^Q:215-3268,H:24-1023^68.297%ID^E:0^RecName: Full=Calcium-transporting ATPase 12, plasma membrane-type;^Eukaryota; Viridiplantae; Streptophyta; Embryophyta; Tracheophyta; Spermatophyta; Magnoliopsida; eudicotyledons; Gunneridae; Pentapetalae; rosids; malvids; Brassicales; Brassicaceae; Camelineae; Arabidopsis;ACA12_ARATH^ACA12_ARATH^Q:3-1715,H:463-1023^70.105%ID^E:0^RecName…	ACA12_ARATH^ACA12_ARATH^Q:215-3268,H:24-1023^68.297%ID^E:0^RecName: Full=Calcium-transporting ATPase 12, plasma membrane-type;^Eukaryota; Viridiplantae; Streptophyta; Embryophyta; Tracheophyta; Spermatophyta; Magnoliopsida; eudicotyledons; Gunneridae; Pentapetalae; rosids; malvids; Brassicales; Brassicaceae; Camelineae; Arabidopsis;ACA12_ARATH^ACA12_ARATH^Q:3-1715,H:463-1023^70.105%ID^E:0^RecName…	328	322	287	1022	1658	1625	1149	2024	4038	1768	1145	1248
Pl01G0000299300.v1	Pl01	36796182	36797914	Pl01G0000299300.1.v1	691-216[+]	.	.	.	.	.	.	25	12	2	228	326	262	238	324	797	571	408	441
Pl01G0000299500.v1	Pl01	36824391	36825317	Pl01G0000299500.1.v1	114-447[+]	KEGG:osa:4326903`KO:K02183	GO:0005509^molecular_function^calcium ion binding`GO:0019722^biological_process^calcium-mediated signaling	PF00036.33^EF-hand_1^EF hand^12-39^E:2.4e-07`PF13405.7^EF-hand_6^EF-hand domain^12-38^E:1.6e-06`PF13499.7^EF-hand_7^EF-hand domain pair^13-73^E:1.2e-15`PF13202.7^EF-hand_5^EF hand^14-35^E:4.6e-05`PF13833.7^EF-hand_8^EF-hand domain pair^25-73^E:9.4e-12`PF00036.33^EF-hand_1^EF hand^48-74^E:3.4e-08`PF13202.7^EF-hand_5^EF hand^49-72^E:0.0003`PF13833.7^EF-hand_8^EF-hand domain pair^64-109^E:5.4e-08`PF…	GO:0005509^molecular_function^calcium ion binding	CALM3_ORYSJ^CALM3_ORYSJ^Q:114-557,H:1-149^66.443%ID^E:5.97e-64^RecName: Full=Calmodulin-3;^Eukaryota; Viridiplantae; Streptophyta; Embryophyta; Tracheophyta; Spermatophyta; Magnoliopsida; Liliopsida; Poales; Poaceae; BOP clade; Oryzoideae; Oryzeae; Oryzinae; Oryza; Oryza sativa	CALM3_ORYSJ^CALM3_ORYSJ^Q:114-557,H:1-149^66.443%ID^E:5.97e-64^RecName: Full=Calmodulin-3;^Eukaryota; Viridiplantae; Streptophyta; Embryophyta; Tracheophyta; Spermatophyta; Magnoliopsida; Liliopsida; Poales; Poaceae; BOP clade; Oryzoideae; Oryzeae; Oryzinae; Oryza; Oryza sativa	0	0	0	0	0	0	47	118	124	0	4	17
Pl01G0000299700.v1	Pl01	36838036	36846686	Pl01G0000299700.1.v1	173-756[+]	KEGG:mtr:MTR_1g471050`KO:K17911	GO:0009507^cellular_component^chloroplast`GO:0016853^molecular_function^isomerase activity`GO:0046872^molecular_function^metal ion binding	PF13225.7^DUF4033^Domain of unknown function (DUF4033)^145-225^E:1.3e-33	.	D27_MEDTR^D27_MEDTR^Q:167-913,H:3-248^69.2%ID^E:1.56e-125^RecName: Full=Beta-carotene isomerase D27, chloroplastic {ECO:0000305};^Eukaryota; Viridiplantae; Streptophyta; Embryophyta; Tracheophyta; Spermatophyta; Magnoliopsida; eudicotyledons; Gunneridae; Pentapetalae; rosids; fabids; Fabales; Fabaceae; Papilionoideae; 50 kb inversion clade; NPAAA clade; Hologalegina; IRL clade; Trifolieae; Medica…	D27_MEDTR^D27_MEDTR^Q:167-913,H:3-248^69.2%ID^E:1.56e-125^RecName: Full=Beta-carotene isomerase D27, chloroplastic {ECO:0000305};^Eukaryota; Viridiplantae; Streptophyta; Embryophyta; Tracheophyta; Spermatophyta; Magnoliopsida; eudicotyledons; Gunneridae; Pentapetalae; rosids; fabids; Fabales; Fabaceae; Papilionoideae; 50 kb inversion clade; NPAAA clade; Hologalegina; IRL clade; Trifolieae; Medica…	24	0	13	29	38	17	11	23	25	0	0	0
Pl01G0000301900.v1	Pl01	37070406	37071757	Pl01G0000301900.1.v1	131-477[+]	KEGG:ath:AT1G28360	GO:0005634^cellular_component^nucleus`GO:0003677^molecular_function^DNA binding`GO:0003700^molecular_function^DNA-binding transcription factor activity`GO:0006952^biological_process^defense response`GO:0009873^biological_process^ethylene-activated signaling pathway	PF00847.21^AP2^AP2 domain^20-69^E:1.8e-13	GO:0003700^molecular_function^DNA-binding transcription factor activity`GO:0006355^biological_process^regulation of transcription, DNA-templated	ERF81_ARATH^ERF81_ARATH^Q:179-358,H:8-67^85%ID^E:5.83e-17^RecName: Full=Ethylene-responsive transcription factor 12;^Eukaryota; Viridiplantae; Streptophyta; Embryophyta; Tracheophyta; Spermatophyta; Magnoliopsida; eudicotyledons; Gunneridae; Pentapetalae; rosids; malvids; Brassicales; Brassicaceae; Camelineae; Arabidopsis	ERF81_ARATH^ERF81_ARATH^Q:179-358,H:8-67^85%ID^E:5.83e-17^RecName: Full=Ethylene-responsive transcription factor 12;^Eukaryota; Viridiplantae; Streptophyta; Embryophyta; Tracheophyta; Spermatophyta; Magnoliopsida; eudicotyledons; Gunneridae; Pentapetalae; rosids; malvids; Brassicales; Brassicaceae; Camelineae; Arabidopsis	2195	1689	1513	195	232	332	1345	2245	5047	103	108	90
Pl01G0000302600.v1	Pl01	37143578	37152960	Pl01G0000302600.1.v1;Pl01G0000302600.2.v1;Pl01G0000302600.3.v1;Pl01G0000302600.4.v1	63-1548[+];63-1548[+];63-1551[+];114-681[+]	KEGG:ag:AAD10204`KO:K13407;KEGG:ag:AAD10204`KO:K13407;KEGG:ag:AAD10204`KO:K13407;KEGG:ag:AAD10204`KO:K13407	GO:0005789^cellular_component^endoplasmic reticulum membrane`GO:0016021^cellular_component^integral component of membrane`GO:0020037^molecular_function^heme binding`GO:0005506^molecular_function^iron ion binding`GO:0004497^molecular_function^monooxygenase activity`GO:0016705^molecular_function^oxidoreductase activity, acting on paired donors, with incorporation or reduction of molecular oxygen;GO…	PF00067.23^p450^Cytochrome P450^49-493^E:4.5e-70;PF00067.23^p450^Cytochrome P450^49-493^E:3.7e-70;PF00067.23^p450^Cytochrome P450^49-494^E:2.5e-70;PF00067.23^p450^Cytochrome P450^16-204^E:6.4e-45	GO:0005506^molecular_function^iron ion binding`GO:0016705^molecular_function^oxidoreductase activity, acting on paired donors, with incorporation or reduction of molecular oxygen`GO:0020037^molecular_function^heme binding`GO:0055114^biological_process^oxidation-reduction process;GO:0005506^molecular_function^iron ion binding`GO:0016705^molecular_function^oxidoreductase activity, acting on paired …	C94A1_VICSA^C94A1_VICSA^Q:186-1601,H:41-514^70.886%ID^E:0^RecName: Full=Cytochrome P450 94A1;^Eukaryota; Viridiplantae; Streptophyta; Embryophyta; Tracheophyta; Spermatophyta; Magnoliopsida; eudicotyledons; Gunneridae; Pentapetalae; rosids; fabids; Fabales; Fabaceae; Papilionoideae; 50 kb inversion clade; NPAAA clade; Hologalegina; IRL clade; Fabeae; Vicia;C94A1_VICSA^C94A1_VICSA^Q:186-1601,H:41-…	C94A1_VICSA^C94A1_VICSA^Q:186-1601,H:41-514^70.886%ID^E:0^RecName: Full=Cytochrome P450 94A1;^Eukaryota; Viridiplantae; Streptophyta; Embryophyta; Tracheophyta; Spermatophyta; Magnoliopsida; eudicotyledons; Gunneridae; Pentapetalae; rosids; fabids; Fabales; Fabaceae; Papilionoideae; 50 kb inversion clade; NPAAA clade; Hologalegina; IRL clade; Fabeae; Vicia;C94A1_VICSA^C94A1_VICSA^Q:186-1601,H:41-…	17	48	33	298	518	510	279	273	937	151	69	78
Pl01G0000302800.v1	Pl01	37176391	37176597	Pl01G0000302800.1.v1	1-207[+]	.	.	.	.	.	.	0	0	0	0	4	5	30	44	111	1	9	4
Pl01G0000304400.v1	Pl01	37303702	37305703	Pl01G0000304400.1.v1	166-639[+]	KEGG:ath:AT2G42430`KO:K13944	GO:0005634^cellular_component^nucleus`GO:1990841^molecular_function^promoter-specific chromatin binding`GO:0009755^biological_process^hormone-mediated signaling pathway`GO:0010311^biological_process^lateral root formation`GO:0045893^biological_process^positive regulation of transcription, DNA-templated	PF03195.15^LOB^Lateral organ boundaries (LOB) domain^16-114^E:8.2e-37	.	LBD16_ARATH^LBD16_ARATH^Q:211-774,H:15-236^50.901%ID^E:3.98e-53^RecName: Full=LOB domain-containing protein 16;^Eukaryota; Viridiplantae; Streptophyta; Embryophyta; Tracheophyta; Spermatophyta; Magnoliopsida; eudicotyledons; Gunneridae; Pentapetalae; rosids; malvids; Brassicales; Brassicaceae; Camelineae; Arabidopsis	LBD16_ARATH^LBD16_ARATH^Q:211-774,H:15-236^50.901%ID^E:3.98e-53^RecName: Full=LOB domain-containing protein 16;^Eukaryota; Viridiplantae; Streptophyta; Embryophyta; Tracheophyta; Spermatophyta; Magnoliopsida; eudicotyledons; Gunneridae; Pentapetalae; rosids; malvids; Brassicales; Brassicaceae; Camelineae; Arabidopsis	119	84	132	9	25	31	90	152	333	0	4	10
Pl01G0000306000.v1	Pl01	37503919	37505962	Pl01G0000306000.1.v1	164-1620[+]	KEGG:ath:AT3G54700`KO:K08176	GO:0016021^cellular_component^integral component of membrane`GO:0005886^cellular_component^plasma membrane`GO:1901683^molecular_function^arsenate ion transmembrane transporter activity`GO:0005315^molecular_function^inorganic phosphate transmembrane transporter activity`GO:0015293^molecular_function^symporter activity`GO:1901684^biological_process^arsenate ion transmembrane transport`GO:0006817^bi…	PF00083.25^Sugar_tr^Sugar (and other) transporter^26-511^E:2.3e-46`PF07690.17^MFS_1^Major Facilitator Superfamily^65-452^E:4.5e-22	GO:0022857^molecular_function^transmembrane transporter activity`GO:0055085^biological_process^transmembrane transport`GO:0016021^cellular_component^integral component of membrane	PHT17_ARATH^PHT17_ARATH^Q:164-1714,H:1-517^84.333%ID^E:0^RecName: Full=Probable inorganic phosphate transporter 1-7;^Eukaryota; Viridiplantae; Streptophyta; Embryophyta; Tracheophyta; Spermatophyta; Magnoliopsida; eudicotyledons; Gunneridae; Pentapetalae; rosids; malvids; Brassicales; Brassicaceae; Camelineae; Arabidopsis	PHT17_ARATH^PHT17_ARATH^Q:164-1714,H:1-517^84.333%ID^E:0^RecName: Full=Probable inorganic phosphate transporter 1-7;^Eukaryota; Viridiplantae; Streptophyta; Embryophyta; Tracheophyta; Spermatophyta; Magnoliopsida; eudicotyledons; Gunneridae; Pentapetalae; rosids; malvids; Brassicales; Brassicaceae; Camelineae; Arabidopsis	203	162	215	386	598	586	1346	1861	4664	226	171	118
Pl01G0000307000.v1	Pl01	37597096	37597570	Pl01G0000307000.1.v1	1-330[+]	KEGG:vvi:100232871`KO:K05765	GO:0015629^cellular_component^actin cytoskeleton`GO:0003779^molecular_function^actin binding`GO:0030042^biological_process^actin filament depolymerization	PF00241.21^Cofilin_ADF^Cofilin/tropomyosin-type actin-binding protein^32-107^E:1.4e-19	GO:0003779^molecular_function^actin binding`GO:0005622^cellular_component^intracellular	ADF_VITVI^ADF_VITVI^Q:1-321,H:1-94^78.505%ID^E:5.24e-45^RecName: Full=Actin-depolymerizing factor;^Eukaryota; Viridiplantae; Streptophyta; Embryophyta; Tracheophyta; Spermatophyta; Magnoliopsida; eudicotyledons; Gunneridae; Pentapetalae; rosids; Vitales; Vitaceae; Viteae; Vitis	ADF_VITVI^ADF_VITVI^Q:1-321,H:1-94^78.505%ID^E:5.24e-45^RecName: Full=Actin-depolymerizing factor;^Eukaryota; Viridiplantae; Streptophyta; Embryophyta; Tracheophyta; Spermatophyta; Magnoliopsida; eudicotyledons; Gunneridae; Pentapetalae; rosids; Vitales; Vitaceae; Viteae; Vitis	58	62	84	239	669	326	167	222	528	319	371	298
Pl01G0000307100.v1	Pl01	37630927	37636054	Pl01G0000307100.1.v1;Pl01G0000307100.2.v1	57-2193[+];16-2091[+]	.;.	GO:0005576^cellular_component^extracellular region`GO:0004252^molecular_function^serine-type endopeptidase activity;GO:0005576^cellular_component^extracellular region`GO:0004252^molecular_function^serine-type endopeptidase activity	PF05922.17^Inhibitor_I9^Peptidase inhibitor I9^31-104^E:1.6e-10`PF00082.23^Peptidase_S8^Subtilase family^128-575^E:1.1e-36`PF17766.2^fn3_6^Fibronectin type-III domain^630-727^E:1e-23;PF05922.17^Inhibitor_I9^Peptidase inhibitor I9^13-70^E:2.9e-08`PF00082.23^Peptidase_S8^Subtilase family^94-541^E:9.5e-37`PF17766.2^fn3_6^Fibronectin type-III domain^596-693^E:9.6e-24	GO:0004252^molecular_function^serine-type endopeptidase activity`GO:0006508^biological_process^proteolysis;GO:0004252^molecular_function^serine-type endopeptidase activity`GO:0006508^biological_process^proteolysis	CUCM1_CUCME^CUCM1_CUCME^Q:132-2237,H:29-727^51.977%ID^E:0^RecName: Full=Cucumisin {ECO:0000303|PubMed:7806492};^Eukaryota; Viridiplantae; Streptophyta; Embryophyta; Tracheophyta; Spermatophyta; Magnoliopsida; eudicotyledons; Gunneridae; Pentapetalae; rosids; fabids; Cucurbitales; Cucurbitaceae; Benincaseae; Cucumis;CUCM1_CUCME^CUCM1_CUCME^Q:1-2094,H:33-727^52.131%ID^E:0^RecName: Full=Cucumisin {E…	CUCM1_CUCME^CUCM1_CUCME^Q:132-2237,H:29-727^51.977%ID^E:0^RecName: Full=Cucumisin {ECO:0000303|PubMed:7806492};^Eukaryota; Viridiplantae; Streptophyta; Embryophyta; Tracheophyta; Spermatophyta; Magnoliopsida; eudicotyledons; Gunneridae; Pentapetalae; rosids; fabids; Cucurbitales; Cucurbitaceae; Benincaseae; Cucumis;CUCM1_CUCME^CUCM1_CUCME^Q:1-2094,H:33-727^52.131%ID^E:0^RecName: Full=Cucumisin {E…	14540	11800	11660	8454	12863	11490	1057	1466	3066	205	102	157
Pl01G0000307800.v1	Pl01	37700440	37702011	Pl01G0000307800.1.v1	100-600[+]	KEGG:ath:AT2G31160	GO:0005634^cellular_component^nucleus`GO:0003677^molecular_function^DNA binding`GO:0010492^biological_process^maintenance of shoot apical meristem identity`GO:0009299^biological_process^mRNA transcription`GO:0010199^biological_process^organ boundary specification between lateral organs and the meristem`GO:0048441^biological_process^petal development`GO:0090698^biological_process^post-embryonic pl…	PF04852.13^DUF640^Protein of unknown function (DUF640)^44-161^E:5.4e-66	.	LSH3_ARATH^LSH3_ARATH^Q:241-633,H:54-184^95.42%ID^E:6.29e-77^RecName: Full=Protein LIGHT-DEPENDENT SHORT HYPOCOTYLS 3;^Eukaryota; Viridiplantae; Streptophyta; Embryophyta; Tracheophyta; Spermatophyta; Magnoliopsida; eudicotyledons; Gunneridae; Pentapetalae; rosids; malvids; Brassicales; Brassicaceae; Camelineae; Arabidopsis	LSH3_ARATH^LSH3_ARATH^Q:241-633,H:54-184^95.42%ID^E:6.29e-77^RecName: Full=Protein LIGHT-DEPENDENT SHORT HYPOCOTYLS 3;^Eukaryota; Viridiplantae; Streptophyta; Embryophyta; Tracheophyta; Spermatophyta; Magnoliopsida; eudicotyledons; Gunneridae; Pentapetalae; rosids; malvids; Brassicales; Brassicaceae; Camelineae; Arabidopsis	438	301	306	472	792	768	39	55	125	2614	1693	1441
Pl01G0000308100.v1	Pl01	37749757	37756537	Pl01G0000308100.1.v1	245-879[+]	KEGG:ath:AT1G56010	GO:0005634^cellular_component^nucleus`GO:0003677^molecular_function^DNA binding`GO:0003700^molecular_function^DNA-binding transcription factor activity`GO:0009734^biological_process^auxin-activated signaling pathway`GO:0048527^biological_process^lateral root development`GO:0010072^biological_process^primary shoot apical meristem specification	PF02365.16^NAM^No apical meristem (NAM) protein^11-137^E:7.4e-37	GO:0003677^molecular_function^DNA binding`GO:0006355^biological_process^regulation of transcription, DNA-templated	NAC22_ARATH^NAC22_ARATH^Q:260-736,H:15-184^56.977%ID^E:2e-60^RecName: Full=NAC domain-containing protein 21/22;^Eukaryota; Viridiplantae; Streptophyta; Embryophyta; Tracheophyta; Spermatophyta; Magnoliopsida; eudicotyledons; Gunneridae; Pentapetalae; rosids; malvids; Brassicales; Brassicaceae; Camelineae; Arabidopsis	NAC22_ARATH^NAC22_ARATH^Q:260-736,H:15-184^56.977%ID^E:2e-60^RecName: Full=NAC domain-containing protein 21/22;^Eukaryota; Viridiplantae; Streptophyta; Embryophyta; Tracheophyta; Spermatophyta; Magnoliopsida; eudicotyledons; Gunneridae; Pentapetalae; rosids; malvids; Brassicales; Brassicaceae; Camelineae; Arabidopsis	24	37	17	369	593	487	264	377	847	334	381	282
Pl01G0000309400.v1	Pl01	37879674	37883557	Pl01G0000309400.1.v1	306-2226[+]	.	GO:0016021^cellular_component^integral component of membrane`GO:0050660^molecular_function^flavin adenine dinucleotide binding`GO:0046577^molecular_function^long-chain-alcohol oxidase activity	PF00732.20^GMC_oxred_N^GMC oxidoreductase^230-497^E:2.1e-67`PF00890.25^FAD_binding_2^FAD binding domain^230-266^E:1.4e-06`PF05199.14^GMC_oxred_C^GMC oxidoreductase^590-723^E:7.5e-23	GO:0016614^molecular_function^oxidoreductase activity, acting on CH-OH group of donors`GO:0050660^molecular_function^flavin adenine dinucleotide binding`GO:0055114^biological_process^oxidation-reduction process	FAO2_LOTJA^FAO2_LOTJA^Q:327-2507,H:10-748^79.865%ID^E:0^RecName: Full=Long-chain-alcohol oxidase FAO2;^Eukaryota; Viridiplantae; Streptophyta; Embryophyta; Tracheophyta; Spermatophyta; Magnoliopsida; eudicotyledons; Gunneridae; Pentapetalae; rosids; fabids; Fabales; Fabaceae; Papilionoideae; 50 kb inversion clade; NPAAA clade; Hologalegina; robinioid clade; Loteae; Lotus	FAO2_LOTJA^FAO2_LOTJA^Q:327-2507,H:10-748^79.865%ID^E:0^RecName: Full=Long-chain-alcohol oxidase FAO2;^Eukaryota; Viridiplantae; Streptophyta; Embryophyta; Tracheophyta; Spermatophyta; Magnoliopsida; eudicotyledons; Gunneridae; Pentapetalae; rosids; fabids; Fabales; Fabaceae; Papilionoideae; 50 kb inversion clade; NPAAA clade; Hologalegina; robinioid clade; Loteae; Lotus	513	395	398	1266	1873	1753	1783	3109	6814	5473	3908	3331
Pl01G0000309500.v1	Pl01	37891236	37891607	Pl01G0000309500.1.v1	1-372[+]	.	.	.	.	.	.	30	21	24	27	59	49	87	95	187	437	449	372
Pl01G0000312400.v1	Pl01	38171772	38172612	Pl01G0000312400.1.v1	126-231[+]	.	.	.	.	.	.	13	15	18	27	39	17	93	125	262	152	142	83
Pl01G0000313200.v1	Pl01	38229420	38229725	Pl01G0000313200.1.v1	146-114[+]	KEGG:ath:AT3G04290	GO:0005576^cellular_component^extracellular region`GO:0016788^molecular_function^hydrolase activity, acting on ester bonds`GO:0042538^biological_process^hyperosmotic salinity response`GO:0016042^biological_process^lipid catabolic process`GO:0010226^biological_process^response to lithium ion`GO:0009751^biological_process^response to salicylic acid	.	.	LTL1_ARATH^LTL1_ARATH^Q:306-163,H:124-171^60.417%ID^E:1.14e-10^RecName: Full=GDSL esterase/lipase LTL1;^Eukaryota; Viridiplantae; Streptophyta; Embryophyta; Tracheophyta; Spermatophyta; Magnoliopsida; eudicotyledons; Gunneridae; Pentapetalae; rosids; malvids; Brassicales; Brassicaceae; Camelineae; Arabidopsis	LTL1_ARATH^LTL1_ARATH^Q:306-163,H:124-171^60.417%ID^E:1.14e-10^RecName: Full=GDSL esterase/lipase LTL1;^Eukaryota; Viridiplantae; Streptophyta; Embryophyta; Tracheophyta; Spermatophyta; Magnoliopsida; eudicotyledons; Gunneridae; Pentapetalae; rosids; malvids; Brassicales; Brassicaceae; Camelineae; Arabidopsis	40	19	35	32	22	11	0	0	0	0	0	0
Pl01G0000314400.v1	Pl01	38333957	38335959	Pl01G0000314400.1.v1	38-1938[+]	KEGG:ath:AT1G61040`KO:K15178	GO:0016593^cellular_component^Cdc73/Paf1 complex`GO:0005634^cellular_component^nucleus`GO:0003677^molecular_function^DNA binding`GO:1990269^molecular_function^RNA polymerase II C-terminal domain phosphoserine binding`GO:0009908^biological_process^flower development`GO:0009910^biological_process^negative regulation of flower development`GO:0045893^biological_process^positive regulation of transcri…	PF03126.19^Plus-3^Plus-3 domain^262-367^E:7.8e-28	GO:0003677^molecular_function^DNA binding	VIP5_ARATH^VIP5_ARATH^Q:812-1561,H:263-512^72.4%ID^E:2.2e-124^RecName: Full=Protein RTF1 homolog {ECO:0000305};^Eukaryota; Viridiplantae; Streptophyta; Embryophyta; Tracheophyta; Spermatophyta; Magnoliopsida; eudicotyledons; Gunneridae; Pentapetalae; rosids; malvids; Brassicales; Brassicaceae; Camelineae; Arabidopsis`VIP5_ARATH^VIP5_ARATH^Q:38-628,H:1-205^53.11%ID^E:1.7e-30^RecName: Full=Protein …	VIP5_ARATH^VIP5_ARATH^Q:812-1561,H:263-512^72.4%ID^E:2.2e-124^RecName: Full=Protein RTF1 homolog {ECO:0000305};^Eukaryota; Viridiplantae; Streptophyta; Embryophyta; Tracheophyta; Spermatophyta; Magnoliopsida; eudicotyledons; Gunneridae; Pentapetalae; rosids; malvids; Brassicales; Brassicaceae; Camelineae; Arabidopsis`VIP5_ARATH^VIP5_ARATH^Q:38-628,H:1-205^53.11%ID^E:1.7e-30^RecName: Full=Protein …	28	15	18	34	111	67	17	7	53	438	337	300
Pl01G0000315500.v1	Pl01	38496939	38498962	Pl01G0000315500.1.v1	66-1107[+]	KEGG:ath:AT4G28780	GO:0005576^cellular_component^extracellular region`GO:0016788^molecular_function^hydrolase activity, acting on ester bonds`GO:0016042^biological_process^lipid catabolic process	PF00657.23^Lipase_GDSL^GDSL-like Lipase/Acylhydrolase^34-345^E:1.4e-24	GO:0016788^molecular_function^hydrolase activity, acting on ester bonds	GDL67_ARATH^GDL67_ARATH^Q:135-1169,H:23-367^65.896%ID^E:9.02e-173^RecName: Full=GDSL esterase/lipase At4g28780;^Eukaryota; Viridiplantae; Streptophyta; Embryophyta; Tracheophyta; Spermatophyta; Magnoliopsida; eudicotyledons; Gunneridae; Pentapetalae; rosids; malvids; Brassicales; Brassicaceae; Camelineae; Arabidopsis	GDL67_ARATH^GDL67_ARATH^Q:135-1169,H:23-367^65.896%ID^E:9.02e-173^RecName: Full=GDSL esterase/lipase At4g28780;^Eukaryota; Viridiplantae; Streptophyta; Embryophyta; Tracheophyta; Spermatophyta; Magnoliopsida; eudicotyledons; Gunneridae; Pentapetalae; rosids; malvids; Brassicales; Brassicaceae; Camelineae; Arabidopsis	238	240	330	193	378	380	106	147	334	37	40	6
Pl01G0000316200.v1	Pl01	38595159	38597891	Pl01G0000316200.1.v1;Pl01G0000316200.2.v1	98-183[+];11-348[+]	.;.	.;.	.;.	.;.	.;.	.;.	30350	22978	24288	354	574	473	18741	27251	63521	480	363	224
Pl01G0000316600.v1	Pl01	38651860	38657044	Pl01G0000316600.1.v1	43-2538[+]	KEGG:ath:AT3G53720	GO:0012505^cellular_component^endomembrane system`GO:0005783^cellular_component^endoplasmic reticulum`GO:0016021^cellular_component^integral component of membrane`GO:0015299^molecular_function^solute:proton antiporter activity`GO:0030007^biological_process^cellular potassium ion homeostasis`GO:0015672^biological_process^monovalent inorganic cation transport`GO:0006813^biological_process^potassium…	PF00999.22^Na_H_Exchanger^Sodium/hydrogen exchanger family^35-423^E:1.4e-64	GO:0015299^molecular_function^solute:proton antiporter activity`GO:0006812^biological_process^cation transport`GO:0055085^biological_process^transmembrane transport`GO:0016021^cellular_component^integral component of membrane	CHX20_ARATH^CHX20_ARATH^Q:43-2538,H:1-841^65.525%ID^E:0^RecName: Full=Cation/H(+) antiporter 20;^Eukaryota; Viridiplantae; Streptophyta; Embryophyta; Tracheophyta; Spermatophyta; Magnoliopsida; eudicotyledons; Gunneridae; Pentapetalae; rosids; malvids; Brassicales; Brassicaceae; Camelineae; Arabidopsis	CHX20_ARATH^CHX20_ARATH^Q:43-2538,H:1-841^65.525%ID^E:0^RecName: Full=Cation/H(+) antiporter 20;^Eukaryota; Viridiplantae; Streptophyta; Embryophyta; Tracheophyta; Spermatophyta; Magnoliopsida; eudicotyledons; Gunneridae; Pentapetalae; rosids; malvids; Brassicales; Brassicaceae; Camelineae; Arabidopsis	40	87	89	95	129	186	453	566	946	106	59	78
Pl01G0000317900.v1	Pl01	38774138	38777302	Pl01G0000317900.1.v1	94-1152[+]	KEGG:ath:AT2G37460	GO:0016021^cellular_component^integral component of membrane`GO:0005886^cellular_component^plasma membrane`GO:0022857^molecular_function^transmembrane transporter activity	PF00892.21^EamA^EamA-like transporter family^19-154^E:1.2e-12`PF00892.21^EamA^EamA-like transporter family^187-326^E:6.9e-11	GO:0016020^cellular_component^membrane`GO:0016021^cellular_component^integral component of membrane	WTR13_ARATH^WTR13_ARATH^Q:106-1212,H:6-370^63.957%ID^E:4.56e-163^RecName: Full=WAT1-related protein At2g37460;^Eukaryota; Viridiplantae; Streptophyta; Embryophyta; Tracheophyta; Spermatophyta; Magnoliopsida; eudicotyledons; Gunneridae; Pentapetalae; rosids; malvids; Brassicales; Brassicaceae; Camelineae; Arabidopsis	WTR13_ARATH^WTR13_ARATH^Q:106-1212,H:6-370^63.957%ID^E:4.56e-163^RecName: Full=WAT1-related protein At2g37460;^Eukaryota; Viridiplantae; Streptophyta; Embryophyta; Tracheophyta; Spermatophyta; Magnoliopsida; eudicotyledons; Gunneridae; Pentapetalae; rosids; malvids; Brassicales; Brassicaceae; Camelineae; Arabidopsis	422	354	394	1525	2446	2100	1706	2562	5926	2945	2034	1873
Pl01G0000318600.v1	Pl01	38833072	38834496	Pl01G0000318600.1.v1	315-279[+]	.	.	PF09713.11^A_thal_3526^Plant protein 1589 of unknown function (A_thal_3526)^13-64^E:2.4e-27	.	.	.	624	454	548	3110	4633	3764	245	429	929	932	877	906
Pl01G0000319200.v1	Pl01	38898120	38901146	Pl01G0000319200.1.v1	741-1908[+]	KEGG:ath:AT3G55150`KO:K07195	GO:0005829^cellular_component^cytosol`GO:0012505^cellular_component^endomembrane system`GO:0000145^cellular_component^exocyst`GO:0016020^cellular_component^membrane`GO:0005634^cellular_component^nucleus`GO:0045335^cellular_component^phagocytic vesicle`GO:0031982^cellular_component^vesicle`GO:0006952^biological_process^defense response`GO:0006887^biological_process^exocytosis`GO:1900426^biological…	PF03081.16^Exo70^Exo70 exocyst complex subunit^247-609^E:7.2e-101	GO:0006887^biological_process^exocytosis`GO:0000145^cellular_component^exocyst	E70H1_ARATH^E70H1_ARATH^Q:885-2576,H:46-608^48.342%ID^E:7.32e-152^RecName: Full=Exocyst complex component EXO70H1 {ECO:0000303|PubMed:16942608};^Eukaryota; Viridiplantae; Streptophyta; Embryophyta; Tracheophyta; Spermatophyta; Magnoliopsida; eudicotyledons; Gunneridae; Pentapetalae; rosids; malvids; Brassicales; Brassicaceae; Camelineae; Arabidopsis	E70H1_ARATH^E70H1_ARATH^Q:885-2576,H:46-608^48.342%ID^E:7.32e-152^RecName: Full=Exocyst complex component EXO70H1 {ECO:0000303|PubMed:16942608};^Eukaryota; Viridiplantae; Streptophyta; Embryophyta; Tracheophyta; Spermatophyta; Magnoliopsida; eudicotyledons; Gunneridae; Pentapetalae; rosids; malvids; Brassicales; Brassicaceae; Camelineae; Arabidopsis	285	160	182	459	792	554	1049	1488	3243	1648	1207	1219
Pl01G0000321000.v1	Pl01	39051808	39054072	Pl01G0000321000.1.v1	38-708[+]	KEGG:ath:AT5G02790`KO:K00799	GO:0005829^cellular_component^cytosol`GO:0005886^cellular_component^plasma membrane`GO:0004364^molecular_function^glutathione transferase activity`GO:0010731^biological_process^protein glutathionylation`GO:0046686^biological_process^response to cadmium ion`GO:0009636^biological_process^response to toxic substance	PF13417.7^GST_N_3^Glutathione S-transferase, N-terminal domain^30-106^E:6.5e-20`PF02798.21^GST_N^Glutathione S-transferase, N-terminal domain^30-100^E:1.7e-05`PF13409.7^GST_N_2^Glutathione S-transferase, N-terminal domain^36-101^E:6.5e-16`PF13410.7^GST_C_2^Glutathione S-transferase, C-terminal domain^143-207^E:2.5e-10	GO:0005515^molecular_function^protein binding	GSTL3_ARATH^GSTL3_ARATH^Q:65-709,H:11-225^66.047%ID^E:1.79e-103^RecName: Full=Glutathione S-transferase L3;^Eukaryota; Viridiplantae; Streptophyta; Embryophyta; Tracheophyta; Spermatophyta; Magnoliopsida; eudicotyledons; Gunneridae; Pentapetalae; rosids; malvids; Brassicales; Brassicaceae; Camelineae; Arabidopsis	GSTL3_ARATH^GSTL3_ARATH^Q:65-709,H:11-225^66.047%ID^E:1.79e-103^RecName: Full=Glutathione S-transferase L3;^Eukaryota; Viridiplantae; Streptophyta; Embryophyta; Tracheophyta; Spermatophyta; Magnoliopsida; eudicotyledons; Gunneridae; Pentapetalae; rosids; malvids; Brassicales; Brassicaceae; Camelineae; Arabidopsis	0	0	0	18	44	20	30	16	29	0	4	3
Pl01G0000322800.v1	Pl01	39228463	39230154	Pl01G0000322800.1.v1	1-681[+]	.	GO:0015935^cellular_component^small ribosomal subunit`GO:0003735^molecular_function^structural constituent of ribosome`GO:0006412^biological_process^translation	PF00164.26^Ribosom_S12_S23^Ribosomal protein S12/S23^115-225^E:3.5e-49	GO:0003735^molecular_function^structural constituent of ribosome`GO:0006412^biological_process^translation`GO:0005840^cellular_component^ribosome	RS23_FRAAN^RS23_FRAAN^Q:253-678,H:1-142^98.592%ID^E:1.2e-98^RecName: Full=40S ribosomal protein S23;^Eukaryota; Viridiplantae; Streptophyta; Embryophyta; Tracheophyta; Spermatophyta; Magnoliopsida; eudicotyledons; Gunneridae; Pentapetalae; rosids; fabids; Rosales; Rosaceae; Rosoideae; Potentilleae; Fragariinae; Fragaria	RS23_FRAAN^RS23_FRAAN^Q:253-678,H:1-142^98.592%ID^E:1.2e-98^RecName: Full=40S ribosomal protein S23;^Eukaryota; Viridiplantae; Streptophyta; Embryophyta; Tracheophyta; Spermatophyta; Magnoliopsida; eudicotyledons; Gunneridae; Pentapetalae; rosids; fabids; Rosales; Rosaceae; Rosoideae; Potentilleae; Fragariinae; Fragaria	0	0	0	0	0	5	287	309	827	332	179	150
Pl01G0000323100.v1	Pl01	39251714	39254951	Pl01G0000323100.1.v1	323-1032[+]	KEGG:ath:AT2G37090`KO:K20869	GO:0005794^cellular_component^Golgi apparatus`GO:0000139^cellular_component^Golgi membrane`GO:0016021^cellular_component^integral component of membrane`GO:0047517^molecular_function^1,4-beta-D-xylan synthase activity`GO:0015018^molecular_function^galactosylgalactosylxylosylprotein 3-beta-glucuronosyltransferase activity`GO:0042285^molecular_function^xylosyltransferase activity`GO:0005975^biologic…	PF03360.17^Glyco_transf_43^Glycosyltransferase family 43^130-334^E:2.5e-64	GO:0015018^molecular_function^galactosylgalactosylxylosylprotein 3-beta-glucuronosyltransferase activity`GO:0016020^cellular_component^membrane	IRX9_ARATH^IRX9_ARATH^Q:323-1339,H:1-347^60.632%ID^E:2.43e-142^RecName: Full=Beta-1,4-xylosyltransferase IRX9 {ECO:0000305};^Eukaryota; Viridiplantae; Streptophyta; Embryophyta; Tracheophyta; Spermatophyta; Magnoliopsida; eudicotyledons; Gunneridae; Pentapetalae; rosids; malvids; Brassicales; Brassicaceae; Camelineae; Arabidopsis	IRX9_ARATH^IRX9_ARATH^Q:323-1339,H:1-347^60.632%ID^E:2.43e-142^RecName: Full=Beta-1,4-xylosyltransferase IRX9 {ECO:0000305};^Eukaryota; Viridiplantae; Streptophyta; Embryophyta; Tracheophyta; Spermatophyta; Magnoliopsida; eudicotyledons; Gunneridae; Pentapetalae; rosids; malvids; Brassicales; Brassicaceae; Camelineae; Arabidopsis	109	104	113	1502	2566	2223	156	234	421	3742	2921	2501
Pl01G0000323800.v1	Pl01	39288989	39296453	Pl01G0000323800.1.v1	26-1497[+]	KEGG:ath:AT3G45290`KO:K08472	GO:0016021^cellular_component^integral component of membrane`GO:0005516^molecular_function^calmodulin binding`GO:0006952^biological_process^defense response`GO:0009607^biological_process^response to biotic stimulus	PF03094.16^Mlo^Mlo family^10-441^E:7.9e-174	GO:0006952^biological_process^defense response`GO:0016021^cellular_component^integral component of membrane	MLO3_ARATH^MLO3_ARATH^Q:53-1315,H:18-454^52.5%ID^E:1.23e-147^RecName: Full=MLO-like protein 3;^Eukaryota; Viridiplantae; Streptophyta; Embryophyta; Tracheophyta; Spermatophyta; Magnoliopsida; eudicotyledons; Gunneridae; Pentapetalae; rosids; malvids; Brassicales; Brassicaceae; Camelineae; Arabidopsis	MLO3_ARATH^MLO3_ARATH^Q:53-1315,H:18-454^52.5%ID^E:1.23e-147^RecName: Full=MLO-like protein 3;^Eukaryota; Viridiplantae; Streptophyta; Embryophyta; Tracheophyta; Spermatophyta; Magnoliopsida; eudicotyledons; Gunneridae; Pentapetalae; rosids; malvids; Brassicales; Brassicaceae; Camelineae; Arabidopsis	26	10	9	422	613	497	144	171	373	800	565	442
Pl01G0000324600.v1	Pl01	39358328	39366239	Pl01G0000324600.1.v1;Pl01G0000324600.2.v1;Pl01G0000324600.3.v1;Pl01G0000324600.4.v1	616-444[+];38-795[+];184-444[+];246-744[+]	KEGG:ath:AT5G03170;KEGG:ath:AT5G03170;KEGG:ath:AT5G03170;KEGG:ath:AT5G03170	GO:0031225^cellular_component^anchored component of membrane`GO:0005886^cellular_component^plasma membrane`GO:0009834^biological_process^plant-type secondary cell wall biogenesis;GO:0031225^cellular_component^anchored component of membrane`GO:0005886^cellular_component^plasma membrane`GO:0009834^biological_process^plant-type secondary cell wall biogenesis;GO:0031225^cellular_component^anchored co…	PF02469.23^Fasciclin^Fasciclin domain^2-80^E:4.1e-05;PF02469.23^Fasciclin^Fasciclin domain^63-197^E:7.6e-22;PF02469.23^Fasciclin^Fasciclin domain^2-80^E:5.1e-06;PF02469.23^Fasciclin^Fasciclin domain^46-180^E:6.3e-22	.;.;.;.	FLA11_ARATH^FLA11_ARATH^Q:397-876,H:28-188^67.081%ID^E:8.3e-54^RecName: Full=Fasciclin-like arabinogalactan protein 11;^Eukaryota; Viridiplantae; Streptophyta; Embryophyta; Tracheophyta; Spermatophyta; Magnoliopsida; eudicotyledons; Gunneridae; Pentapetalae; rosids; malvids; Brassicales; Brassicaceae; Camelineae; Arabidopsis;FLA11_ARATH^FLA11_ARATH^Q:128-649,H:13-188^65.341%ID^E:1.71e-55^RecName:…	FLA11_ARATH^FLA11_ARATH^Q:397-876,H:28-188^67.081%ID^E:8.3e-54^RecName: Full=Fasciclin-like arabinogalactan protein 11;^Eukaryota; Viridiplantae; Streptophyta; Embryophyta; Tracheophyta; Spermatophyta; Magnoliopsida; eudicotyledons; Gunneridae; Pentapetalae; rosids; malvids; Brassicales; Brassicaceae; Camelineae; Arabidopsis;FLA11_ARATH^FLA11_ARATH^Q:128-649,H:13-188^65.341%ID^E:1.71e-55^RecName:…	1336	1001	1130	8253	13366	11260	383	548	1277	17022	12945	11523
Pl01G0000325500.v1	Pl01	39460552	39461040	Pl01G0000325500.1.v1	1-489[+]	.	.	PF04520.14^Senescence_reg^Senescence regulator^59-162^E:8.1e-36	.	.	.	6	6	10	138	111	112	153	157	369	305	103	135
Pl01G0000325700.v1	Pl01	39473473	39477364	Pl01G0000325700.1.v1	1-765[+]	KEGG:ath:AT2G37210`KO:K22522	GO:0005829^cellular_component^cytosol`GO:0005634^cellular_component^nucleus`GO:0016799^molecular_function^hydrolase activity, hydrolyzing N-glycosyl compounds`GO:0009691^biological_process^cytokinin biosynthetic process	PF18306.2^LDcluster4^SLOG cluster4 family^78-161^E:8.2e-10`PF03641.15^Lysine_decarbox^Possible lysine decarboxylase^92-222^E:2e-46	.	LOG3_ARATH^LOG3_ARATH^Q:1-726,H:1-208^75.309%ID^E:2.01e-127^RecName: Full=Cytokinin riboside 5'-monophosphate phosphoribohydrolase LOG3;^Eukaryota; Viridiplantae; Streptophyta; Embryophyta; Tracheophyta; Spermatophyta; Magnoliopsida; eudicotyledons; Gunneridae; Pentapetalae; rosids; malvids; Brassicales; Brassicaceae; Camelineae; Arabidopsis	LOG3_ARATH^LOG3_ARATH^Q:1-726,H:1-208^75.309%ID^E:2.01e-127^RecName: Full=Cytokinin riboside 5'-monophosphate phosphoribohydrolase LOG3;^Eukaryota; Viridiplantae; Streptophyta; Embryophyta; Tracheophyta; Spermatophyta; Magnoliopsida; eudicotyledons; Gunneridae; Pentapetalae; rosids; malvids; Brassicales; Brassicaceae; Camelineae; Arabidopsis	663	528	458	86	79	81	533	781	1894	257	163	149
Pl01G0000325900.v1	Pl01	39513742	39514435	Pl01G0000325900.1.v1	408-198[+]	.	.	.	.	.	.	129	61	107	749	1198	1099	1986	2801	6671	2397	1923	1876
Pl01G0000326400.v1	Pl01	39593303	39600614	Pl01G0000326400.1.v1	1-1179[+]	KEGG:ath:AT5G03300`KO:K00856	GO:0005737^cellular_component^cytoplasm`GO:0005829^cellular_component^cytosol`GO:0005634^cellular_component^nucleus`GO:0005886^cellular_component^plasma membrane`GO:0004001^molecular_function^adenosine kinase activity`GO:0005524^molecular_function^ATP binding`GO:0005507^molecular_function^copper ion binding`GO:0019900^molecular_function^kinase binding`GO:0006169^biological_process^adenosine salva…	PF00294.25^PfkB^pfkB family carbohydrate kinase^130-386^E:8.7e-65	.	ADK2_ARATH^ADK2_ARATH^Q:10-1176,H:8-345^67.609%ID^E:0^RecName: Full=Adenosine kinase 2;^Eukaryota; Viridiplantae; Streptophyta; Embryophyta; Tracheophyta; Spermatophyta; Magnoliopsida; eudicotyledons; Gunneridae; Pentapetalae; rosids; malvids; Brassicales; Brassicaceae; Camelineae; Arabidopsis	ADK2_ARATH^ADK2_ARATH^Q:10-1176,H:8-345^67.609%ID^E:0^RecName: Full=Adenosine kinase 2;^Eukaryota; Viridiplantae; Streptophyta; Embryophyta; Tracheophyta; Spermatophyta; Magnoliopsida; eudicotyledons; Gunneridae; Pentapetalae; rosids; malvids; Brassicales; Brassicaceae; Camelineae; Arabidopsis	134	185	216	723	964	968	311	417	917	3103	1816	1833
Pl01G0000327700.v1	Pl01	39724215	39725205	Pl01G0000327700.1.v1	741-222[+]	.	.	.	.	.	.	13	4	6	5	25	9	29	74	181	138	120	105
Pl01G0000328000.v1	Pl01	39765886	39767328	Pl01G0000328000.1.v1	1-1086[+]	KEGG:ath:AT5G57620`KO:K09422	GO:0048226^cellular_component^Casparian strip`GO:0005634^cellular_component^nucleus`GO:0003700^molecular_function^DNA-binding transcription factor activity`GO:0043565^molecular_function^sequence-specific DNA binding`GO:0000976^molecular_function^transcription regulatory region sequence-specific DNA binding`GO:0030154^biological_process^cell differentiation`GO:0035987^biological_process^endodermal…	PF00249.32^Myb_DNA-binding^Myb-like DNA-binding domain^14-62^E:6.5e-15`PF13921.7^Myb_DNA-bind_6^Myb-like DNA-binding domain^17-77^E:8.1e-11	.	MYB36_ARATH^MYB36_ARATH^Q:1-447,H:1-119^67.785%ID^E:4.65e-66^RecName: Full=Transcription factor MYB36 {ECO:0000303|PubMed:9839469};^Eukaryota; Viridiplantae; Streptophyta; Embryophyta; Tracheophyta; Spermatophyta; Magnoliopsida; eudicotyledons; Gunneridae; Pentapetalae; rosids; malvids; Brassicales; Brassicaceae; Camelineae; Arabidopsis	MYB36_ARATH^MYB36_ARATH^Q:1-447,H:1-119^67.785%ID^E:4.65e-66^RecName: Full=Transcription factor MYB36 {ECO:0000303|PubMed:9839469};^Eukaryota; Viridiplantae; Streptophyta; Embryophyta; Tracheophyta; Spermatophyta; Magnoliopsida; eudicotyledons; Gunneridae; Pentapetalae; rosids; malvids; Brassicales; Brassicaceae; Camelineae; Arabidopsis	48	62	66	852	1269	934	707	955	2664	1367	884	827
Pl01G0000328100.v1	Pl01	39787244	39788712	Pl01G0000328100.1.v1	6-1173[+]	KEGG:sly:544302`KO:K00789	GO:0005829^cellular_component^cytosol`GO:0005524^molecular_function^ATP binding`GO:0046872^molecular_function^metal ion binding`GO:0004478^molecular_function^methionine adenosyltransferase activity`GO:0006730^biological_process^one-carbon metabolic process`GO:0006556^biological_process^S-adenosylmethionine biosynthetic process	PF00438.21^S-AdoMet_synt_N^S-adenosylmethionine synthetase, N-terminal domain^4-101^E:8.8e-42`PF02772.17^S-AdoMet_synt_M^S-adenosylmethionine synthetase, central domain^117-238^E:6.5e-48`PF02773.17^S-AdoMet_synt_C^S-adenosylmethionine synthetase, C-terminal domain^240-381^E:1.1e-60	GO:0004478^molecular_function^methionine adenosyltransferase activity`GO:0006556^biological_process^S-adenosylmethionine biosynthetic process	METK3_SOLLC^METK3_SOLLC^Q:6-1175,H:1-390^93.333%ID^E:0^RecName: Full=S-adenosylmethionine synthase 3;^Eukaryota; Viridiplantae; Streptophyta; Embryophyta; Tracheophyta; Spermatophyta; Magnoliopsida; eudicotyledons; Gunneridae; Pentapetalae; asterids; lamiids; Solanales; Solanaceae; Solanoideae; Solaneae; Solanum; Solanum subgen. Lycopersicon	METK3_SOLLC^METK3_SOLLC^Q:6-1175,H:1-390^93.333%ID^E:0^RecName: Full=S-adenosylmethionine synthase 3;^Eukaryota; Viridiplantae; Streptophyta; Embryophyta; Tracheophyta; Spermatophyta; Magnoliopsida; eudicotyledons; Gunneridae; Pentapetalae; asterids; lamiids; Solanales; Solanaceae; Solanoideae; Solaneae; Solanum; Solanum subgen. Lycopersicon	3774	3045	2860	3319	4922	3876	22	79	64	16	19	11
Pl01G0000328600.v1	Pl01	39825178	39827005	Pl01G0000328600.1.v1	1-954[+]	KEGG:ath:AT2G36870`KO:K08235	GO:0048046^cellular_component^apoplast`GO:0005618^cellular_component^cell wall`GO:0004553^molecular_function^hydrolase activity, hydrolyzing O-glycosyl compounds`GO:0016762^molecular_function^xyloglucan:xyloglucosyl transferase activity`GO:0042546^biological_process^cell wall biogenesis`GO:0016998^biological_process^cell wall macromolecule catabolic process`GO:0071555^biological_process^cell wall…	PF00722.22^Glyco_hydro_16^Glycosyl hydrolases family 16^39-175^E:2.3e-36`PF00722.22^Glyco_hydro_16^Glycosyl hydrolases family 16^196-244^E:7.2e-10`PF06955.13^XET_C^Xyloglucan endo-transglycosylase (XET) C-terminus^277-315^E:9.7e-13	GO:0004553^molecular_function^hydrolase activity, hydrolyzing O-glycosyl compounds`GO:0005975^biological_process^carbohydrate metabolic process`GO:0016762^molecular_function^xyloglucan:xyloglucosyl transferase activity`GO:0006073^biological_process^cellular glucan metabolic process`GO:0005618^cellular_component^cell wall`GO:0048046^cellular_component^apoplast	XTH32_ARATH^XTH32_ARATH^Q:7-948,H:9-298^77.389%ID^E:1.89e-159^RecName: Full=Probable xyloglucan endotransglucosylase/hydrolase protein 32;^Eukaryota; Viridiplantae; Streptophyta; Embryophyta; Tracheophyta; Spermatophyta; Magnoliopsida; eudicotyledons; Gunneridae; Pentapetalae; rosids; malvids; Brassicales; Brassicaceae; Camelineae; Arabidopsis	XTH32_ARATH^XTH32_ARATH^Q:7-948,H:9-298^77.389%ID^E:1.89e-159^RecName: Full=Probable xyloglucan endotransglucosylase/hydrolase protein 32;^Eukaryota; Viridiplantae; Streptophyta; Embryophyta; Tracheophyta; Spermatophyta; Magnoliopsida; eudicotyledons; Gunneridae; Pentapetalae; rosids; malvids; Brassicales; Brassicaceae; Camelineae; Arabidopsis	729	470	511	802	1020	929	255	343	754	1674	1294	1073
Pl01G0000328950.v1	Pl01	39878849	39881429	Pl01G0000328950.1.v1;Pl01G0000328950.2.v1	572-1722[+];186-726[+]	KEGG:ath:AT1G31470;KEGG:yli:YALI0A16060g	GO:0016021^cellular_component^integral component of membrane`GO:0016020^cellular_component^membrane`GO:0005739^cellular_component^mitochondrion`GO:0000741^biological_process^karyogamy`GO:0010197^biological_process^polar nucleus fusion`GO:0009651^biological_process^response to salt stress;GO:0016021^cellular_component^integral component of membrane`GO:0016020^cellular_component^membrane`GO:0005774…	PF06813.14^Nodulin-like^Nodulin-like^12-258^E:4.4e-89;PF07690.17^MFS_1^Major Facilitator Superfamily^7-206^E:1.3e-10	.;GO:0055085^biological_process^transmembrane transport`GO:0016021^cellular_component^integral component of membrane	NFD4_ARATH^NFD4_ARATH^Q:605-1063,H:43-194^31.169%ID^E:2.1e-10^RecName: Full=Protein NUCLEAR FUSION DEFECTIVE 4 {ECO:0000303|PubMed:16698901};^Eukaryota; Viridiplantae; Streptophyta; Embryophyta; Tracheophyta; Spermatophyta; Magnoliopsida; eudicotyledons; Gunneridae; Pentapetalae; rosids; malvids; Brassicales; Brassicaceae; Camelineae; Arabidopsis`NFD4_ARATH^NFD4_ARATH^Q:1625-2272,H:379-575^22.477…	NFD4_ARATH^NFD4_ARATH^Q:605-1063,H:43-194^31.169%ID^E:2.1e-10^RecName: Full=Protein NUCLEAR FUSION DEFECTIVE 4 {ECO:0000303|PubMed:16698901};^Eukaryota; Viridiplantae; Streptophyta; Embryophyta; Tracheophyta; Spermatophyta; Magnoliopsida; eudicotyledons; Gunneridae; Pentapetalae; rosids; malvids; Brassicales; Brassicaceae; Camelineae; Arabidopsis`NFD4_ARATH^NFD4_ARATH^Q:1625-2272,H:379-575^22.477…	471	408	400	1494	2409	2261	825	1167	2535	1641	1150	1068
Pl01G0000330300.v1	Pl01	40006577	40012730	Pl01G0000330300.1.v1;Pl01G0000330300.2.v1	304-2448[+];304-1860[+]	KEGG:ath:AT3G09920`KO:K00889;KEGG:ath:AT3G09920`KO:K00889	GO:0005829^cellular_component^cytosol`GO:0016020^cellular_component^membrane`GO:0005634^cellular_component^nucleus`GO:0016308^molecular_function^1-phosphatidylinositol-4-phosphate 5-kinase activity`GO:0005524^molecular_function^ATP binding`GO:0005975^biological_process^carbohydrate metabolic process`GO:0006520^biological_process^cellular amino acid metabolic process;GO:0005829^cellular_component^…	PF02493.21^MORN^MORN repeat^57-79^E:0.086`PF02493.21^MORN^MORN repeat^80-100^E:2.3e-06`PF02493.21^MORN^MORN repeat^103-122^E:0.0062`PF02493.21^MORN^MORN repeat^126-148^E:0.00023`PF02493.21^MORN^MORN repeat^149-171^E:7.4e-06`PF02493.21^MORN^MORN repeat^172-193^E:0.00064`PF02493.21^MORN^MORN repeat^195-216^E:7e-08`PF02493.21^MORN^MORN repeat^218-239^E:0.0091`PF01504.19^PIP5K^Phosphatidylinositol-4-…	GO:0016307^molecular_function^phosphatidylinositol phosphate kinase activity`GO:0046488^biological_process^phosphatidylinositol metabolic process;GO:0016307^molecular_function^phosphatidylinositol phosphate kinase activity`GO:0046488^biological_process^phosphatidylinositol metabolic process	PI5K9_ARATH^PI5K9_ARATH^Q:340-2736,H:8-812^73.243%ID^E:0^RecName: Full=Phosphatidylinositol 4-phosphate 5-kinase 9;^Eukaryota; Viridiplantae; Streptophyta; Embryophyta; Tracheophyta; Spermatophyta; Magnoliopsida; eudicotyledons; Gunneridae; Pentapetalae; rosids; malvids; Brassicales; Brassicaceae; Camelineae; Arabidopsis;PI5K9_ARATH^PI5K9_ARATH^Q:340-2154,H:8-617^73.127%ID^E:0^RecName: Full=Phosp…	PI5K9_ARATH^PI5K9_ARATH^Q:340-2736,H:8-812^73.243%ID^E:0^RecName: Full=Phosphatidylinositol 4-phosphate 5-kinase 9;^Eukaryota; Viridiplantae; Streptophyta; Embryophyta; Tracheophyta; Spermatophyta; Magnoliopsida; eudicotyledons; Gunneridae; Pentapetalae; rosids; malvids; Brassicales; Brassicaceae; Camelineae; Arabidopsis;PI5K9_ARATH^PI5K9_ARATH^Q:340-2154,H:8-617^73.127%ID^E:0^RecName: Full=Phosp…	607	472	517	2739	4413	3586	810	1372	3088	6232	4631	4255
Pl01G0000330500.v1	Pl01	40035898	40037981	Pl01G0000330500.1.v1	122-834[+]	KEGG:ath:AT2G39700	GO:0005829^cellular_component^cytosol`GO:0005576^cellular_component^extracellular region`GO:0016020^cellular_component^membrane`GO:0009505^cellular_component^plant-type cell wall`GO:0009506^cellular_component^plasmodesma`GO:0009664^biological_process^plant-type cell wall organization`GO:0006949^biological_process^syncytium formation	PF03330.19^DPBB_1^Lytic transglycolase^86-172^E:1.5e-19`PF01357.22^Expansin_C^Expansin C-terminal domain^183-262^E:2.1e-21	.	EXPA4_ARATH^EXPA4_ARATH^Q:272-949,H:30-255^60.526%ID^E:4.15e-101^RecName: Full=Expansin-A4;^Eukaryota; Viridiplantae; Streptophyta; Embryophyta; Tracheophyta; Spermatophyta; Magnoliopsida; eudicotyledons; Gunneridae; Pentapetalae; rosids; malvids; Brassicales; Brassicaceae; Camelineae; Arabidopsis	EXPA4_ARATH^EXPA4_ARATH^Q:272-949,H:30-255^60.526%ID^E:4.15e-101^RecName: Full=Expansin-A4;^Eukaryota; Viridiplantae; Streptophyta; Embryophyta; Tracheophyta; Spermatophyta; Magnoliopsida; eudicotyledons; Gunneridae; Pentapetalae; rosids; malvids; Brassicales; Brassicaceae; Camelineae; Arabidopsis	0	4	4	1101	1852	1681	37	39	78	8552	4650	3374
Pl01G0000331200.v1	Pl01	40127366	40129067	Pl01G0000331200.1.v1	115-1554[+]	KEGG:ath:AT2G36760`KO:K13496	GO:0043231^cellular_component^intracellular membrane-bounded organelle`GO:0008194^molecular_function^UDP-glycosyltransferase activity	PF00201.19^UDPGT^UDP-glucoronosyl and UDP-glucosyl transferase^300-420^E:1.1e-22	GO:0016758^molecular_function^transferase activity, transferring hexosyl groups	U73C2_ARATH^U73C2_ARATH^Q:193-1641,H:13-495^55.992%ID^E:0^RecName: Full=UDP-glycosyltransferase 73C2;^Eukaryota; Viridiplantae; Streptophyta; Embryophyta; Tracheophyta; Spermatophyta; Magnoliopsida; eudicotyledons; Gunneridae; Pentapetalae; rosids; malvids; Brassicales; Brassicaceae; Camelineae; Arabidopsis	U73C2_ARATH^U73C2_ARATH^Q:193-1641,H:13-495^55.992%ID^E:0^RecName: Full=UDP-glycosyltransferase 73C2;^Eukaryota; Viridiplantae; Streptophyta; Embryophyta; Tracheophyta; Spermatophyta; Magnoliopsida; eudicotyledons; Gunneridae; Pentapetalae; rosids; malvids; Brassicales; Brassicaceae; Camelineae; Arabidopsis	74	62	76	1570	2564	2040	1896	2914	6001	2885	2012	1783
Pl01G0000331300.v1	Pl01	40133551	40135011	Pl01G0000331300.1.v1	1-1461[+]	KEGG:ath:AT2G36760`KO:K13496	GO:0043231^cellular_component^intracellular membrane-bounded organelle`GO:0008194^molecular_function^UDP-glycosyltransferase activity	PF00201.19^UDPGT^UDP-glucoronosyl and UDP-glucosyl transferase^278-399^E:5.7e-22	GO:0016758^molecular_function^transferase activity, transferring hexosyl groups	U73C2_ARATH^U73C2_ARATH^Q:25-1449,H:14-493^57.083%ID^E:0^RecName: Full=UDP-glycosyltransferase 73C2;^Eukaryota; Viridiplantae; Streptophyta; Embryophyta; Tracheophyta; Spermatophyta; Magnoliopsida; eudicotyledons; Gunneridae; Pentapetalae; rosids; malvids; Brassicales; Brassicaceae; Camelineae; Arabidopsis	U73C2_ARATH^U73C2_ARATH^Q:25-1449,H:14-493^57.083%ID^E:0^RecName: Full=UDP-glycosyltransferase 73C2;^Eukaryota; Viridiplantae; Streptophyta; Embryophyta; Tracheophyta; Spermatophyta; Magnoliopsida; eudicotyledons; Gunneridae; Pentapetalae; rosids; malvids; Brassicales; Brassicaceae; Camelineae; Arabidopsis	24	20	46	2285	3567	2915	3034	4331	8918	2906	2213	2057
Pl01G0000331400.v1	Pl01	40150831	40152303	Pl01G0000331400.1.v1	1-1473[+]	KEGG:ath:AT2G36800`KO:K13496	GO:0005783^cellular_component^endoplasmic reticulum`GO:0016021^cellular_component^integral component of membrane`GO:0043231^cellular_component^intracellular membrane-bounded organelle`GO:0050502^molecular_function^cis-zeatin O-beta-D-glucosyltransferase activity`GO:0046527^molecular_function^glucosyltransferase activity`GO:0080046^molecular_function^quercetin 4'-O-glucosyltransferase activity`GO:…	PF00201.19^UDPGT^UDP-glucoronosyl and UDP-glucosyl transferase^270-399^E:4.7e-23	GO:0016758^molecular_function^transferase activity, transferring hexosyl groups	U73C5_ARATH^U73C5_ARATH^Q:25-1449,H:12-489^55.532%ID^E:0^RecName: Full=UDP-glycosyltransferase 73C5;^Eukaryota; Viridiplantae; Streptophyta; Embryophyta; Tracheophyta; Spermatophyta; Magnoliopsida; eudicotyledons; Gunneridae; Pentapetalae; rosids; malvids; Brassicales; Brassicaceae; Camelineae; Arabidopsis	U73C5_ARATH^U73C5_ARATH^Q:25-1449,H:12-489^55.532%ID^E:0^RecName: Full=UDP-glycosyltransferase 73C5;^Eukaryota; Viridiplantae; Streptophyta; Embryophyta; Tracheophyta; Spermatophyta; Magnoliopsida; eudicotyledons; Gunneridae; Pentapetalae; rosids; malvids; Brassicales; Brassicaceae; Camelineae; Arabidopsis	46	35	71	1623	2542	2258	1335	2186	4479	1552	1044	1015
Pl01G0000331500.v1	Pl01	40155100	40156566	Pl01G0000331500.1.v1	1-1467[+]	KEGG:ath:AT2G36800`KO:K13496	GO:0005783^cellular_component^endoplasmic reticulum`GO:0016021^cellular_component^integral component of membrane`GO:0043231^cellular_component^intracellular membrane-bounded organelle`GO:0050502^molecular_function^cis-zeatin O-beta-D-glucosyltransferase activity`GO:0046527^molecular_function^glucosyltransferase activity`GO:0080046^molecular_function^quercetin 4'-O-glucosyltransferase activity`GO:…	PF00201.19^UDPGT^UDP-glucoronosyl and UDP-glucosyl transferase^279-400^E:4.6e-22	GO:0016758^molecular_function^transferase activity, transferring hexosyl groups	U73C5_ARATH^U73C5_ARATH^Q:25-1443,H:12-489^57.083%ID^E:1.01e-178^RecName: Full=UDP-glycosyltransferase 73C5;^Eukaryota; Viridiplantae; Streptophyta; Embryophyta; Tracheophyta; Spermatophyta; Magnoliopsida; eudicotyledons; Gunneridae; Pentapetalae; rosids; malvids; Brassicales; Brassicaceae; Camelineae; Arabidopsis	U73C5_ARATH^U73C5_ARATH^Q:25-1443,H:12-489^57.083%ID^E:1.01e-178^RecName: Full=UDP-glycosyltransferase 73C5;^Eukaryota; Viridiplantae; Streptophyta; Embryophyta; Tracheophyta; Spermatophyta; Magnoliopsida; eudicotyledons; Gunneridae; Pentapetalae; rosids; malvids; Brassicales; Brassicaceae; Camelineae; Arabidopsis	83	82	88	1303	1868	1609	762	1067	2434	864	574	672
Pl01G0000331900.v1	Pl01	40185772	40187377	Pl01G0000331900.1.v1;Pl01G0000331900.2.v1	106-1470[+];45-1425[+]	KEGG:ath:AT2G36800`KO:K13496;KEGG:ath:AT2G36800`KO:K13496	GO:0005783^cellular_component^endoplasmic reticulum`GO:0016021^cellular_component^integral component of membrane`GO:0043231^cellular_component^intracellular membrane-bounded organelle`GO:0050502^molecular_function^cis-zeatin O-beta-D-glucosyltransferase activity`GO:0046527^molecular_function^glucosyltransferase activity`GO:0080046^molecular_function^quercetin 4'-O-glucosyltransferase activity`GO:…	PF00201.19^UDPGT^UDP-glucoronosyl and UDP-glucosyl transferase^264-401^E:6.2e-21;PF00201.19^UDPGT^UDP-glucoronosyl and UDP-glucosyl transferase^249-386^E:5.8e-21	GO:0016758^molecular_function^transferase activity, transferring hexosyl groups;GO:0016758^molecular_function^transferase activity, transferring hexosyl groups	U73C5_ARATH^U73C5_ARATH^Q:109-1557,H:5-489^51.639%ID^E:0^RecName: Full=UDP-glycosyltransferase 73C5;^Eukaryota; Viridiplantae; Streptophyta; Embryophyta; Tracheophyta; Spermatophyta; Magnoliopsida; eudicotyledons; Gunneridae; Pentapetalae; rosids; malvids; Brassicales; Brassicaceae; Camelineae; Arabidopsis;U73C5_ARATH^U73C5_ARATH^Q:3-1451,H:5-489^51.639%ID^E:0^RecName: Full=UDP-glycosyltransferas…	U73C5_ARATH^U73C5_ARATH^Q:109-1557,H:5-489^51.639%ID^E:0^RecName: Full=UDP-glycosyltransferase 73C5;^Eukaryota; Viridiplantae; Streptophyta; Embryophyta; Tracheophyta; Spermatophyta; Magnoliopsida; eudicotyledons; Gunneridae; Pentapetalae; rosids; malvids; Brassicales; Brassicaceae; Camelineae; Arabidopsis;U73C5_ARATH^U73C5_ARATH^Q:3-1451,H:5-489^51.639%ID^E:0^RecName: Full=UDP-glycosyltransferas…	59	64	21	327	553	491	399	560	1120	312	212	175
Pl01G0000332000.v1	Pl01	40194436	40196255	Pl01G0000332000.1.v1	119-1461[+]	KEGG:ath:AT3G53150	GO:0043231^cellular_component^intracellular membrane-bounded organelle`GO:0008194^molecular_function^UDP-glycosyltransferase activity	PF00201.19^UDPGT^UDP-glucoronosyl and UDP-glucosyl transferase^270-402^E:3.3e-20	GO:0016758^molecular_function^transferase activity, transferring hexosyl groups	U73D1_ARATH^U73D1_ARATH^Q:143-1576,H:13-503^59.674%ID^E:0^RecName: Full=UDP-glycosyltransferase 73D1;^Eukaryota; Viridiplantae; Streptophyta; Embryophyta; Tracheophyta; Spermatophyta; Magnoliopsida; eudicotyledons; Gunneridae; Pentapetalae; rosids; malvids; Brassicales; Brassicaceae; Camelineae; Arabidopsis	U73D1_ARATH^U73D1_ARATH^Q:143-1576,H:13-503^59.674%ID^E:0^RecName: Full=UDP-glycosyltransferase 73D1;^Eukaryota; Viridiplantae; Streptophyta; Embryophyta; Tracheophyta; Spermatophyta; Magnoliopsida; eudicotyledons; Gunneridae; Pentapetalae; rosids; malvids; Brassicales; Brassicaceae; Camelineae; Arabidopsis	3	0	0	8	13	18	39	52	121	0	3	9
Pl01G0000332800.v1	Pl01	40250068	40252043	Pl01G0000332800.1.v1	208-534[+]	.	.	.	.	.	.	0	0	0	0	0	0	109	162	295	225	138	156
Pl01G0000332900.v1	Pl01	40253480	40255207	Pl01G0000332900.1.v1	103-303[+]	KEGG:ath:AT3G58170`KO:K08504	GO:0005829^cellular_component^cytosol`GO:0005789^cellular_component^endoplasmic reticulum membrane`GO:0030173^cellular_component^integral component of Golgi membrane`GO:0005634^cellular_component^nucleus`GO:0005886^cellular_component^plasma membrane`GO:0015031^biological_process^protein transport`GO:0016192^biological_process^vesicle-mediated transport	.	.	BET11_ARATH^BET11_ARATH^Q:451-326,H:8-46^66.667%ID^E:7.26e-09^RecName: Full=Bet1-like SNARE 1-1;^Eukaryota; Viridiplantae; Streptophyta; Embryophyta; Tracheophyta; Spermatophyta; Magnoliopsida; eudicotyledons; Gunneridae; Pentapetalae; rosids; malvids; Brassicales; Brassicaceae; Camelineae; Arabidopsis	BET11_ARATH^BET11_ARATH^Q:451-326,H:8-46^66.667%ID^E:7.26e-09^RecName: Full=Bet1-like SNARE 1-1;^Eukaryota; Viridiplantae; Streptophyta; Embryophyta; Tracheophyta; Spermatophyta; Magnoliopsida; eudicotyledons; Gunneridae; Pentapetalae; rosids; malvids; Brassicales; Brassicaceae; Camelineae; Arabidopsis	0	0	0	0	0	0	47	76	160	97	87	73
Pl01G0000334800.v1	Pl01	40390470	40394760	Pl01G0000334800.1.v1	478-1614[+]	KEGG:ath:AT5G03795	GO:0000139^cellular_component^Golgi membrane`GO:0016021^cellular_component^integral component of membrane`GO:0016757^molecular_function^transferase activity, transferring glycosyl groups`GO:0071555^biological_process^cell wall organization`GO:0006486^biological_process^protein glycosylation	PF03016.16^Exostosin^Exostosin family^200-479^E:8.2e-61	.	GLYT3_ARATH^GLYT3_ARATH^Q:835-2061,H:105-515^66.423%ID^E:0^RecName: Full=Probable glycosyltransferase At5g03795;^Eukaryota; Viridiplantae; Streptophyta; Embryophyta; Tracheophyta; Spermatophyta; Magnoliopsida; eudicotyledons; Gunneridae; Pentapetalae; rosids; malvids; Brassicales; Brassicaceae; Camelineae; Arabidopsis	GLYT3_ARATH^GLYT3_ARATH^Q:835-2061,H:105-515^66.423%ID^E:0^RecName: Full=Probable glycosyltransferase At5g03795;^Eukaryota; Viridiplantae; Streptophyta; Embryophyta; Tracheophyta; Spermatophyta; Magnoliopsida; eudicotyledons; Gunneridae; Pentapetalae; rosids; malvids; Brassicales; Brassicaceae; Camelineae; Arabidopsis	168	131	153	362	550	631	206	356	687	2001	1178	913
Pl01G0000334900.v1	Pl01	40396913	40398260	Pl01G0000334900.1.v1	97-924[+]	.	GO:0005618^cellular_component^cell wall`GO:0005737^cellular_component^cytoplasm`GO:0005576^cellular_component^extracellular region	PF02987.17^LEA_4^Late embryogenesis abundant protein^123-154^E:2.8e-06`PF02987.17^LEA_4^Late embryogenesis abundant protein^135-173^E:1.5e-11`PF02987.17^LEA_4^Late embryogenesis abundant protein^168-211^E:1.6e-15	.	LEAD8_DAUCA^LEAD8_DAUCA^Q:484-1017,H:299-555^37.838%ID^E:1.01e-29^RecName: Full=Embryonic protein DC-8;^Eukaryota; Viridiplantae; Streptophyta; Embryophyta; Tracheophyta; Spermatophyta; Magnoliopsida; eudicotyledons; Gunneridae; Pentapetalae; asterids; campanulids; Apiales; Apiaceae; Apioideae; Scandiceae; Daucinae; Daucus; Daucus sect. Daucus`LEAD8_DAUCA^LEAD8_DAUCA^Q:280-744,H:28-264^34.836%ID^…	LEAD8_DAUCA^LEAD8_DAUCA^Q:484-1017,H:299-555^37.838%ID^E:1.01e-29^RecName: Full=Embryonic protein DC-8;^Eukaryota; Viridiplantae; Streptophyta; Embryophyta; Tracheophyta; Spermatophyta; Magnoliopsida; eudicotyledons; Gunneridae; Pentapetalae; asterids; campanulids; Apiales; Apiaceae; Apioideae; Scandiceae; Daucinae; Daucus; Daucus sect. Daucus`LEAD8_DAUCA^LEAD8_DAUCA^Q:280-744,H:28-264^34.836%ID^…	0	0	0	477	813	393	524	780	2019	40858	16569	19974
Pl01G0000335300.v1	Pl01	40429983	40432083	Pl01G0000335300.1.v1	367-1371[+]	.	.	PF13837.7^Myb_DNA-bind_4^Myb/SANT-like DNA-binding domain^105-229^E:1.4e-21	.	.	.	13	12	37	160	228	195	88	231	540	94	93	49
Pl01G0000335500.v1	Pl01	40444372	40446478	Pl01G0000335500.1.v1	1-2034[+]	KEGG:ath:AT2G36570	GO:0016021^cellular_component^integral component of membrane`GO:0005886^cellular_component^plasma membrane`GO:0005524^molecular_function^ATP binding`GO:0004672^molecular_function^protein kinase activity`GO:0009834^biological_process^plant-type secondary cell wall biogenesis	PF08263.13^LRRNT_2^Leucine rich repeat N-terminal domain^27-65^E:3.2e-05`PF00560.34^LRR_1^Leucine Rich Repeat^93-107^E:1400`PF00560.34^LRR_1^Leucine Rich Repeat^116-137^E:7.9`PF00560.34^LRR_1^Leucine Rich Repeat^142-158^E:120`PF00560.34^LRR_1^Leucine Rich Repeat^187-208^E:52`PF00069.26^Pkinase^Protein kinase domain^368-640^E:3.1e-33`PF07714.18^PK_Tyr_Ser-Thr^Protein tyrosine and serine/threonine …	GO:0005515^molecular_function^protein binding`GO:0004672^molecular_function^protein kinase activity`GO:0005524^molecular_function^ATP binding`GO:0006468^biological_process^protein phosphorylation	PXC1_ARATH^PXC1_ARATH^Q:67-2019,H:19-671^64.157%ID^E:0^RecName: Full=Leucine-rich repeat receptor-like protein kinase PXC1 {ECO:0000305};^Eukaryota; Viridiplantae; Streptophyta; Embryophyta; Tracheophyta; Spermatophyta; Magnoliopsida; eudicotyledons; Gunneridae; Pentapetalae; rosids; malvids; Brassicales; Brassicaceae; Camelineae; Arabidopsis	PXC1_ARATH^PXC1_ARATH^Q:67-2019,H:19-671^64.157%ID^E:0^RecName: Full=Leucine-rich repeat receptor-like protein kinase PXC1 {ECO:0000305};^Eukaryota; Viridiplantae; Streptophyta; Embryophyta; Tracheophyta; Spermatophyta; Magnoliopsida; eudicotyledons; Gunneridae; Pentapetalae; rosids; malvids; Brassicales; Brassicaceae; Camelineae; Arabidopsis	42983	34792	34279	10731	16824	15201	25696	35708	79500	2164	1507	1119
Pl01G0000336100.v1	Pl01	40480848	40481914	Pl01G0000336100.1.v1	264-441[+]	.	.	.	.	.	.	4	11	3	116	157	62	59	160	381	3626	1299	1744
Pl01G0000336300.v1	Pl01	40497501	40502827	Pl01G0000336300.1.v1	631-1602[+]	KEGG:ath:AT5G03760`KO:K13680	GO:0005794^cellular_component^Golgi apparatus`GO:0000139^cellular_component^Golgi membrane`GO:0016021^cellular_component^integral component of membrane`GO:0047259^molecular_function^glucomannan 4-beta-mannosyltransferase activity`GO:0051753^molecular_function^mannan synthase activity`GO:0016757^molecular_function^transferase activity, transferring glycosyl groups`GO:0071555^biological_process^cel…	PF13641.7^Glyco_tranf_2_3^Glycosyltransferase like family 2^98-332^E:8.5e-20`PF00535.27^Glycos_transf_2^Glycosyl transferase family 2^102-262^E:5.6e-14`PF13632.7^Glyco_trans_2_3^Glycosyl transferase family group 2^191-384^E:5.9e-19	.	CSLA9_ARATH^CSLA9_ARATH^Q:631-2226,H:1-532^78.947%ID^E:0^RecName: Full=Glucomannan 4-beta-mannosyltransferase 9 {ECO:0000305};^Eukaryota; Viridiplantae; Streptophyta; Embryophyta; Tracheophyta; Spermatophyta; Magnoliopsida; eudicotyledons; Gunneridae; Pentapetalae; rosids; malvids; Brassicales; Brassicaceae; Camelineae; Arabidopsis	CSLA9_ARATH^CSLA9_ARATH^Q:631-2226,H:1-532^78.947%ID^E:0^RecName: Full=Glucomannan 4-beta-mannosyltransferase 9 {ECO:0000305};^Eukaryota; Viridiplantae; Streptophyta; Embryophyta; Tracheophyta; Spermatophyta; Magnoliopsida; eudicotyledons; Gunneridae; Pentapetalae; rosids; malvids; Brassicales; Brassicaceae; Camelineae; Arabidopsis	5622	4294	4178	2524	3725	3297	2880	4194	9149	481	246	204
Pl01G0000337800.v1	Pl01	40657666	40661279	Pl01G0000337800.1.v1	1-1557[+]	KEGG:ath:AT2G36460`KO:K01623	GO:0005829^cellular_component^cytosol`GO:0005783^cellular_component^endoplasmic reticulum`GO:0005739^cellular_component^mitochondrion`GO:0005634^cellular_component^nucleus`GO:0005886^cellular_component^plasma membrane`GO:0009506^cellular_component^plasmodesma`GO:0005507^molecular_function^copper ion binding`GO:0004332^molecular_function^fructose-bisphosphate aldolase activity`GO:0071456^biologica…	PF05910.13^DUF868^Plant protein of unknown function (DUF868)^37-291^E:2.5e-78`PF00274.20^Glycolytic^Fructose-bisphosphate aldolase class-I^309-395^E:1e-33`PF00274.20^Glycolytic^Fructose-bisphosphate aldolase class-I^403-512^E:3.2e-42	GO:0004332^molecular_function^fructose-bisphosphate aldolase activity`GO:0006096^biological_process^glycolytic process	ALFC6_ARATH^ALFC6_ARATH^Q:925-1536,H:104-358^64.844%ID^E:3.46e-101^RecName: Full=Fructose-bisphosphate aldolase 6, cytosolic {ECO:0000305};^Eukaryota; Viridiplantae; Streptophyta; Embryophyta; Tracheophyta; Spermatophyta; Magnoliopsida; eudicotyledons; Gunneridae; Pentapetalae; rosids; malvids; Brassicales; Brassicaceae; Camelineae; Arabidopsis	ALFC6_ARATH^ALFC6_ARATH^Q:925-1536,H:104-358^64.844%ID^E:3.46e-101^RecName: Full=Fructose-bisphosphate aldolase 6, cytosolic {ECO:0000305};^Eukaryota; Viridiplantae; Streptophyta; Embryophyta; Tracheophyta; Spermatophyta; Magnoliopsida; eudicotyledons; Gunneridae; Pentapetalae; rosids; malvids; Brassicales; Brassicaceae; Camelineae; Arabidopsis	79	41	93	679	1059	829	1993	2900	6735	3540	2812	2525
Pl01G0000338200.v1	Pl01	40711851	40713634	Pl01G0000338200.1.v1	318-1356[+]	KEGG:ath:AT3G47200	GO:0016021^cellular_component^integral component of membrane`GO:0005886^cellular_component^plasma membrane	PF03140.16^DUF247^Plant protein of unknown function^49-432^E:9.9e-116	.	Y3720_ARATH^Y3720_ARATH^Q:411-1685,H:31-470^38.255%ID^E:1.79e-92^RecName: Full=UPF0481 protein At3g47200;^Eukaryota; Viridiplantae; Streptophyta; Embryophyta; Tracheophyta; Spermatophyta; Magnoliopsida; eudicotyledons; Gunneridae; Pentapetalae; rosids; malvids; Brassicales; Brassicaceae; Camelineae; Arabidopsis	Y3720_ARATH^Y3720_ARATH^Q:411-1685,H:31-470^38.255%ID^E:1.79e-92^RecName: Full=UPF0481 protein At3g47200;^Eukaryota; Viridiplantae; Streptophyta; Embryophyta; Tracheophyta; Spermatophyta; Magnoliopsida; eudicotyledons; Gunneridae; Pentapetalae; rosids; malvids; Brassicales; Brassicaceae; Camelineae; Arabidopsis	140	145	118	175	265	229	40	44	140	54	27	22
Pl01G0000338700.v1	Pl01	40800079	40806333	Pl01G0000338700.1.v1	1-3273[+]	KEGG:ath:AT1G66950	GO:0016021^cellular_component^integral component of membrane`GO:0005886^cellular_component^plasma membrane`GO:0005524^molecular_function^ATP binding`GO:0016887^molecular_function^ATPase activity`GO:0042626^molecular_function^ATPase-coupled transmembrane transporter activity`GO:0000302^biological_process^response to reactive oxygen species`GO:0055085^biological_process^transmembrane transport`GO:0…	PF19055.1^ABC2_membrane_7^ABC-2 type transporter^47-101^E:2.1e-06`PF01061.25^ABC2_membrane^ABC-2 type transporter^168-370^E:3.3e-35`PF08370.12^PDR_assoc^Plant PDR ABC transporter associated^375-441^E:1.2e-24`PF00005.28^ABC_tran^ABC transporter^517-669^E:1.3e-19`PF19055.1^ABC2_membrane_7^ABC-2 type transporter^698-764^E:2.1e-06`PF01061.25^ABC2_membrane^ABC-2 type transporter^815-1027^E:9.3e-56	GO:0016020^cellular_component^membrane`GO:0005524^molecular_function^ATP binding`GO:0016887^molecular_function^ATPase activity	AB39G_ARATH^AB39G_ARATH^Q:1-3270,H:360-1454^67.604%ID^E:0^RecName: Full=ABC transporter G family member 39;^Eukaryota; Viridiplantae; Streptophyta; Embryophyta; Tracheophyta; Spermatophyta; Magnoliopsida; eudicotyledons; Gunneridae; Pentapetalae; rosids; malvids; Brassicales; Brassicaceae; Camelineae; Arabidopsis`AB39G_ARATH^AB39G_ARATH^Q:1306-3258,H:118-801^22.969%ID^E:2.48e-31^RecName: Full=ABC…	AB39G_ARATH^AB39G_ARATH^Q:1-3270,H:360-1454^67.604%ID^E:0^RecName: Full=ABC transporter G family member 39;^Eukaryota; Viridiplantae; Streptophyta; Embryophyta; Tracheophyta; Spermatophyta; Magnoliopsida; eudicotyledons; Gunneridae; Pentapetalae; rosids; malvids; Brassicales; Brassicaceae; Camelineae; Arabidopsis`AB39G_ARATH^AB39G_ARATH^Q:1306-3258,H:118-801^22.969%ID^E:2.48e-31^RecName: Full=ABC…	0	0	0	22	30	48	10	15	11	421	281	227
Pl01G0000339500.v1	Pl01	40871831	40876530	Pl01G0000339500.1.v1;Pl01G0000339500.2.v1	122-1548[+];122-1545[+]	.;.	GO:0005634^cellular_component^nucleus`GO:0003700^molecular_function^DNA-binding transcription factor activity`GO:0043565^molecular_function^sequence-specific DNA binding`GO:0006355^biological_process^regulation of transcription, DNA-templated;GO:0005634^cellular_component^nucleus`GO:0003700^molecular_function^DNA-binding transcription factor activity`GO:0043565^molecular_function^sequence-specifi…	PF00170.22^bZIP_1^bZIP transcription factor^172-234^E:2.7e-09;PF00170.22^bZIP_1^bZIP transcription factor^171-233^E:2.7e-09	GO:0003700^molecular_function^DNA-binding transcription factor activity`GO:0006355^biological_process^regulation of transcription, DNA-templated;GO:0003700^molecular_function^DNA-binding transcription factor activity`GO:0006355^biological_process^regulation of transcription, DNA-templated	HBP1A_WHEAT^HBP1A_WHEAT^Q:665-844,H:260-319^50%ID^E:2.16e-07^RecName: Full=Transcription factor HBP-1a;^Eukaryota; Viridiplantae; Streptophyta; Embryophyta; Tracheophyta; Spermatophyta; Magnoliopsida; Liliopsida; Poales; Poaceae; BOP clade; Pooideae; Triticodae; Triticeae; Triticinae; Triticum;HBP1A_WHEAT^HBP1A_WHEAT^Q:662-841,H:260-319^50%ID^E:2.31e-07^RecName: Full=Transcription factor HBP-1a;^…	HBP1A_WHEAT^HBP1A_WHEAT^Q:665-844,H:260-319^50%ID^E:2.16e-07^RecName: Full=Transcription factor HBP-1a;^Eukaryota; Viridiplantae; Streptophyta; Embryophyta; Tracheophyta; Spermatophyta; Magnoliopsida; Liliopsida; Poales; Poaceae; BOP clade; Pooideae; Triticodae; Triticeae; Triticinae; Triticum;HBP1A_WHEAT^HBP1A_WHEAT^Q:662-841,H:260-319^50%ID^E:2.31e-07^RecName: Full=Transcription factor HBP-1a;^…	94	73	117	83	172	139	129	138	384	4592	1544	1598
Pl01G0000340100.v1	Pl01	40919541	40923915	Pl01G0000340100.1.v1	1-1383[+]	KEGG:ath:AT3G52820`KO:K22390	GO:0005576^cellular_component^extracellular region`GO:0003993^molecular_function^acid phosphatase activity`GO:0046872^molecular_function^metal ion binding	PF16656.6^Pur_ac_phosph_N^Purple acid Phosphatase, N-terminal domain^55-139^E:2e-20`PF00149.29^Metallophos^Calcineurin-like phosphoesterase^173-358^E:1.4e-21`PF14008.7^Metallophos_C^Iron/zinc purple acid phosphatase-like protein C^373-430^E:3.2e-17	GO:0003993^molecular_function^acid phosphatase activity`GO:0046872^molecular_function^metal ion binding`GO:0016787^molecular_function^hydrolase activity	PPA22_ARATH^PPA22_ARATH^Q:109-1329,H:29-418^65.356%ID^E:0^RecName: Full=Purple acid phosphatase 22;^Eukaryota; Viridiplantae; Streptophyta; Embryophyta; Tracheophyta; Spermatophyta; Magnoliopsida; eudicotyledons; Gunneridae; Pentapetalae; rosids; malvids; Brassicales; Brassicaceae; Camelineae; Arabidopsis	PPA22_ARATH^PPA22_ARATH^Q:109-1329,H:29-418^65.356%ID^E:0^RecName: Full=Purple acid phosphatase 22;^Eukaryota; Viridiplantae; Streptophyta; Embryophyta; Tracheophyta; Spermatophyta; Magnoliopsida; eudicotyledons; Gunneridae; Pentapetalae; rosids; malvids; Brassicales; Brassicaceae; Camelineae; Arabidopsis	26	26	29	118	201	240	1096	1547	4042	920	509	571
Pl01G0000340600.v1	Pl01	40967740	40968173	Pl01G0000340600.1.v1	9-282[+]	.	.	.	.	.	.	3	0	0	0	0	0	26	24	92	8	17	6
Pl01G0000340700.v1	Pl01	40973729	40976858	Pl01G0000340700.1.v1	12-1185[+]	KEGG:ath:AT2G36270`KO:K14432	GO:0005634^cellular_component^nucleus`GO:0003677^molecular_function^DNA binding`GO:0003700^molecular_function^DNA-binding transcription factor activity`GO:0009738^biological_process^abscisic acid-activated signaling pathway`GO:0010187^biological_process^negative regulation of seed germination`GO:0045893^biological_process^positive regulation of transcription, DNA-templated`GO:0006355^biological_p…	PF07716.16^bZIP_2^Basic region leucine zipper^308-358^E:9.8e-10`PF00170.22^bZIP_1^bZIP transcription factor^309-359^E:9.1e-12	GO:0003700^molecular_function^DNA-binding transcription factor activity`GO:0006355^biological_process^regulation of transcription, DNA-templated	ABI5_ARATH^ABI5_ARATH^Q:369-1193,H:153-441^50.825%ID^E:2.38e-69^RecName: Full=Protein ABSCISIC ACID-INSENSITIVE 5;^Eukaryota; Viridiplantae; Streptophyta; Embryophyta; Tracheophyta; Spermatophyta; Magnoliopsida; eudicotyledons; Gunneridae; Pentapetalae; rosids; malvids; Brassicales; Brassicaceae; Camelineae; Arabidopsis`ABI5_ARATH^ABI5_ARATH^Q:12-230,H:1-75^61.333%ID^E:1.1e-18^RecName: Full=Prote…	ABI5_ARATH^ABI5_ARATH^Q:369-1193,H:153-441^50.825%ID^E:2.38e-69^RecName: Full=Protein ABSCISIC ACID-INSENSITIVE 5;^Eukaryota; Viridiplantae; Streptophyta; Embryophyta; Tracheophyta; Spermatophyta; Magnoliopsida; eudicotyledons; Gunneridae; Pentapetalae; rosids; malvids; Brassicales; Brassicaceae; Camelineae; Arabidopsis`ABI5_ARATH^ABI5_ARATH^Q:12-230,H:1-75^61.333%ID^E:1.1e-18^RecName: Full=Prote…	0	0	0	10	16	12	28	43	92	2312	1038	1137
Pl01G0000341900.v1	Pl01	41089222	41091243	Pl01G0000341900.1.v1	254-1176[+]	KEGG:ath:AT5G39865	GO:0005886^cellular_component^plasma membrane`GO:0009055^molecular_function^electron transfer activity`GO:0015035^molecular_function^protein disulfide oxidoreductase activity	PF00462.25^Glutaredoxin^Glutaredoxin^248-315^E:4.5e-12	GO:0009055^molecular_function^electron transfer activity`GO:0015035^molecular_function^protein disulfide oxidoreductase activity`GO:0045454^biological_process^cell redox homeostasis	Y5986_ARATH^Y5986_ARATH^Q:704-1423,H:134-388^35.472%ID^E:4.92e-22^RecName: Full=Uncharacterized protein At5g39865;^Eukaryota; Viridiplantae; Streptophyta; Embryophyta; Tracheophyta; Spermatophyta; Magnoliopsida; eudicotyledons; Gunneridae; Pentapetalae; rosids; malvids; Brassicales; Brassicaceae; Camelineae; Arabidopsis	Y5986_ARATH^Y5986_ARATH^Q:704-1423,H:134-388^35.472%ID^E:4.92e-22^RecName: Full=Uncharacterized protein At5g39865;^Eukaryota; Viridiplantae; Streptophyta; Embryophyta; Tracheophyta; Spermatophyta; Magnoliopsida; eudicotyledons; Gunneridae; Pentapetalae; rosids; malvids; Brassicales; Brassicaceae; Camelineae; Arabidopsis	1985	1617	1731	331	606	410	1090	1658	3691	1161	669	521
Pl01G0000343300.v1	Pl01	41213672	41215824	Pl01G0000343300.1.v1	151-759[+]	KEGG:ath:AT5G22380	GO:0005634^cellular_component^nucleus`GO:0003677^molecular_function^DNA binding`GO:0003700^molecular_function^DNA-binding transcription factor activity	PF02365.16^NAM^No apical meristem (NAM) protein^5-135^E:2.7e-30	GO:0003677^molecular_function^DNA binding`GO:0006355^biological_process^regulation of transcription, DNA-templated	NAC90_ARATH^NAC90_ARATH^Q:169-729,H:8-201^55.385%ID^E:9.34e-62^RecName: Full=NAC domain-containing protein 90;^Eukaryota; Viridiplantae; Streptophyta; Embryophyta; Tracheophyta; Spermatophyta; Magnoliopsida; eudicotyledons; Gunneridae; Pentapetalae; rosids; malvids; Brassicales; Brassicaceae; Camelineae; Arabidopsis	NAC90_ARATH^NAC90_ARATH^Q:169-729,H:8-201^55.385%ID^E:9.34e-62^RecName: Full=NAC domain-containing protein 90;^Eukaryota; Viridiplantae; Streptophyta; Embryophyta; Tracheophyta; Spermatophyta; Magnoliopsida; eudicotyledons; Gunneridae; Pentapetalae; rosids; malvids; Brassicales; Brassicaceae; Camelineae; Arabidopsis	0	5	11	74	115	113	69	170	295	55	22	53
Pl01G0000345200.v1	Pl01	41355738	41358866	Pl01G0000345200.1.v1;Pl01G0000345200.2.v1	1036-273[+];800-240[+]	.;.	.;.	.;.	.;.	.;.	.;.	0	0	0	0	0	0	290	367	631	231	131	65
Pl01G0000346200.v1	Pl01	41475242	41478566	Pl01G0000346200.1.v1	33-585[+]	KEGG:ath:AT5G42560	.	PF03134.20^TB2_DP1_HVA22^TB2/DP1, HVA22 family^19-97^E:2.5e-24	.	HA22I_ARATH^HA22I_ARATH^Q:33-467,H:1-145^56.552%ID^E:2.25e-55^RecName: Full=HVA22-like protein i;^Eukaryota; Viridiplantae; Streptophyta; Embryophyta; Tracheophyta; Spermatophyta; Magnoliopsida; eudicotyledons; Gunneridae; Pentapetalae; rosids; malvids; Brassicales; Brassicaceae; Camelineae; Arabidopsis	HA22I_ARATH^HA22I_ARATH^Q:33-467,H:1-145^56.552%ID^E:2.25e-55^RecName: Full=HVA22-like protein i;^Eukaryota; Viridiplantae; Streptophyta; Embryophyta; Tracheophyta; Spermatophyta; Magnoliopsida; eudicotyledons; Gunneridae; Pentapetalae; rosids; malvids; Brassicales; Brassicaceae; Camelineae; Arabidopsis	211	228	141	397	755	639	795	1092	2409	1186	832	809
Pl01G0000346700.v1	Pl01	41526674	41527327	Pl01G0000346700.1.v1	1-654[+]	KEGG:ath:AT2G35980	GO:0046658^cellular_component^anchored component of plasma membrane`GO:0009507^cellular_component^chloroplast`GO:0016021^cellular_component^integral component of membrane`GO:0009506^cellular_component^plasmodesma`GO:0051607^biological_process^defense response to virus`GO:0010150^biological_process^leaf senescence`GO:0051707^biological_process^response to other organism	PF03168.14^LEA_2^Late embryogenesis abundant protein^92-195^E:1.5e-12	.	NHL10_ARATH^NHL10_ARATH^Q:10-648,H:7-226^51.121%ID^E:7e-57^RecName: Full=NDR1/HIN1-like protein 10 {ECO:0000303|PubMed:14666423};^Eukaryota; Viridiplantae; Streptophyta; Embryophyta; Tracheophyta; Spermatophyta; Magnoliopsida; eudicotyledons; Gunneridae; Pentapetalae; rosids; malvids; Brassicales; Brassicaceae; Camelineae; Arabidopsis	NHL10_ARATH^NHL10_ARATH^Q:10-648,H:7-226^51.121%ID^E:7e-57^RecName: Full=NDR1/HIN1-like protein 10 {ECO:0000303|PubMed:14666423};^Eukaryota; Viridiplantae; Streptophyta; Embryophyta; Tracheophyta; Spermatophyta; Magnoliopsida; eudicotyledons; Gunneridae; Pentapetalae; rosids; malvids; Brassicales; Brassicaceae; Camelineae; Arabidopsis	260	236	271	581	904	907	1030	1403	3165	510	392	359
Pl01G0000346800.v1	Pl01	41530865	41548235	Pl01G0000346800.1.v1	116-687[+]	KEGG:ath:AT2G35980	GO:0046658^cellular_component^anchored component of plasma membrane`GO:0009507^cellular_component^chloroplast`GO:0016021^cellular_component^integral component of membrane`GO:0009506^cellular_component^plasmodesma`GO:0051607^biological_process^defense response to virus`GO:0010150^biological_process^leaf senescence`GO:0051707^biological_process^response to other organism	PF03168.14^LEA_2^Late embryogenesis abundant protein^98-204^E:3.4e-07	.	NHL10_ARATH^NHL10_ARATH^Q:128-799,H:4-227^41.228%ID^E:1.64e-48^RecName: Full=NDR1/HIN1-like protein 10 {ECO:0000303|PubMed:14666423};^Eukaryota; Viridiplantae; Streptophyta; Embryophyta; Tracheophyta; Spermatophyta; Magnoliopsida; eudicotyledons; Gunneridae; Pentapetalae; rosids; malvids; Brassicales; Brassicaceae; Camelineae; Arabidopsis	NHL10_ARATH^NHL10_ARATH^Q:128-799,H:4-227^41.228%ID^E:1.64e-48^RecName: Full=NDR1/HIN1-like protein 10 {ECO:0000303|PubMed:14666423};^Eukaryota; Viridiplantae; Streptophyta; Embryophyta; Tracheophyta; Spermatophyta; Magnoliopsida; eudicotyledons; Gunneridae; Pentapetalae; rosids; malvids; Brassicales; Brassicaceae; Camelineae; Arabidopsis	15	10	26	185	279	232	381	525	1033	272	256	250
Pl01G0000349500.v1	Pl01	41797210	41798001	Pl01G0000349500.2.v1	1-792[+]	KEGG:ath:AT5G39865	GO:0005886^cellular_component^plasma membrane`GO:0009055^molecular_function^electron transfer activity`GO:0015035^molecular_function^protein disulfide oxidoreductase activity	PF00462.25^Glutaredoxin^Glutaredoxin^116-182^E:6e-10	GO:0009055^molecular_function^electron transfer activity`GO:0015035^molecular_function^protein disulfide oxidoreductase activity`GO:0045454^biological_process^cell redox homeostasis	Y5986_ARATH^Y5986_ARATH^Q:334-789,H:223-389^40.719%ID^E:9.43e-34^RecName: Full=Uncharacterized protein At5g39865;^Eukaryota; Viridiplantae; Streptophyta; Embryophyta; Tracheophyta; Spermatophyta; Magnoliopsida; eudicotyledons; Gunneridae; Pentapetalae; rosids; malvids; Brassicales; Brassicaceae; Camelineae; Arabidopsis	Y5986_ARATH^Y5986_ARATH^Q:334-789,H:223-389^40.719%ID^E:9.43e-34^RecName: Full=Uncharacterized protein At5g39865;^Eukaryota; Viridiplantae; Streptophyta; Embryophyta; Tracheophyta; Spermatophyta; Magnoliopsida; eudicotyledons; Gunneridae; Pentapetalae; rosids; malvids; Brassicales; Brassicaceae; Camelineae; Arabidopsis	1061	734	712	725	1090	902	457	695	1539	143	165	137
Pl01G0000350100.v1	Pl01	41846091	41848869	Pl01G0000350100.1.v1;Pl01G0000350100.2.v1;Pl01G0000350100.3.v1	5-1287[+];5-1284[+];447-615[+]	KEGG:ath:AT2G35880;KEGG:ath:AT2G35880;KEGG:ath:AT2G35880	GO:0005783^cellular_component^endoplasmic reticulum`GO:0005874^cellular_component^microtubule;GO:0005783^cellular_component^endoplasmic reticulum`GO:0005874^cellular_component^microtubule;GO:0005783^cellular_component^endoplasmic reticulum`GO:0005874^cellular_component^microtubule	PF06886.12^TPX2^Targeting protein for Xklp2 (TPX2) domain^241-324^E:7.5e-25;PF06886.12^TPX2^Targeting protein for Xklp2 (TPX2) domain^240-323^E:7.5e-25;PF06886.12^TPX2^Targeting protein for Xklp2 (TPX2) domain^17-100^E:1.8e-25	.;.;.	WDL4_ARATH^WDL4_ARATH^Q:332-1144,H:93-373^44.737%ID^E:3.07e-38^RecName: Full=Protein WVD2-like 4 {ECO:0000305};^Eukaryota; Viridiplantae; Streptophyta; Embryophyta; Tracheophyta; Spermatophyta; Magnoliopsida; eudicotyledons; Gunneridae; Pentapetalae; rosids; malvids; Brassicales; Brassicaceae; Camelineae; Arabidopsis;WDL4_ARATH^WDL4_ARATH^Q:332-1141,H:93-373^44.408%ID^E:2.6e-38^RecName: Full=Prot…	WDL4_ARATH^WDL4_ARATH^Q:332-1144,H:93-373^44.737%ID^E:3.07e-38^RecName: Full=Protein WVD2-like 4 {ECO:0000305};^Eukaryota; Viridiplantae; Streptophyta; Embryophyta; Tracheophyta; Spermatophyta; Magnoliopsida; eudicotyledons; Gunneridae; Pentapetalae; rosids; malvids; Brassicales; Brassicaceae; Camelineae; Arabidopsis;WDL4_ARATH^WDL4_ARATH^Q:332-1141,H:93-373^44.408%ID^E:2.6e-38^RecName: Full=Prot…	1660	1201	1187	4022	6336	5665	280	440	923	3295	2242	2327
Pl01G0000350700.v1	Pl01	41883024	41891070	Pl01G0000350700.1.v1;Pl01G0000350700.2.v1;Pl01G0000350700.3.v1;Pl01G0000350700.4.v1	112-1677[+];22-2208[+];45-1815[+];117-1092[+]	KEGG:ath:AT5G06530;KEGG:ath:AT5G06530;KEGG:ath:AT5G06530;KEGG:ath:AT5G06530	GO:0016021^cellular_component^integral component of membrane`GO:0005886^cellular_component^plasma membrane`GO:0005524^molecular_function^ATP binding`GO:0016887^molecular_function^ATPase activity`GO:0042626^molecular_function^ATPase-coupled transmembrane transporter activity`GO:0009414^biological_process^response to water deprivation`GO:0055085^biological_process^transmembrane transport`GO:0010148…	PF00005.28^ABC_tran^ABC transporter^1-136^E:9.6e-23`PF19055.1^ABC2_membrane_7^ABC-2 type transporter^165-471^E:2.4e-14`PF01061.25^ABC2_membrane^ABC-2 type transporter^303-512^E:3.9e-40;PF00005.28^ABC_tran^ABC transporter^162-313^E:4.5e-28`PF19055.1^ABC2_membrane_7^ABC-2 type transporter^342-648^E:5.9e-14`PF01061.25^ABC2_membrane^ABC-2 type transporter^480-689^E:6.8e-40;PF00005.28^ABC_tran^ABC tra…	GO:0005524^molecular_function^ATP binding`GO:0016887^molecular_function^ATPase activity`GO:0016020^cellular_component^membrane;GO:0005524^molecular_function^ATP binding`GO:0016887^molecular_function^ATPase activity`GO:0016020^cellular_component^membrane;GO:0005524^molecular_function^ATP binding`GO:0016887^molecular_function^ATPase activity`GO:0016020^cellular_component^membrane;GO:0016020^cellula…	AB22G_ARATH^AB22G_ARATH^Q:1-1773,H:159-749^79.019%ID^E:0^RecName: Full=ABC transporter G family member 22;^Eukaryota; Viridiplantae; Streptophyta; Embryophyta; Tracheophyta; Spermatophyta; Magnoliopsida; eudicotyledons; Gunneridae; Pentapetalae; rosids; malvids; Brassicales; Brassicaceae; Camelineae; Arabidopsis;AB22G_ARATH^AB22G_ARATH^Q:16-2214,H:1-749^74.8%ID^E:0^RecName: Full=ABC transporter G…	AB22G_ARATH^AB22G_ARATH^Q:1-1773,H:159-749^79.019%ID^E:0^RecName: Full=ABC transporter G family member 22;^Eukaryota; Viridiplantae; Streptophyta; Embryophyta; Tracheophyta; Spermatophyta; Magnoliopsida; eudicotyledons; Gunneridae; Pentapetalae; rosids; malvids; Brassicales; Brassicaceae; Camelineae; Arabidopsis;AB22G_ARATH^AB22G_ARATH^Q:16-2214,H:1-749^74.8%ID^E:0^RecName: Full=ABC transporter G…	314	230	164	241	418	443	764	1028	2763	2282	1632	1342
Pl01G0000351100.v1	Pl01	41927285	41930648	Pl01G0000351100.1.v1	150-1023[+]	KEGG:ath:AT5G06570	GO:0016787^molecular_function^hydrolase activity`GO:0080030^molecular_function^methyl indole-3-acetate esterase activity`GO:0009056^biological_process^catabolic process	PF00135.29^COesterase^Carboxylesterase family^54-115^E:0.00015`PF07859.14^Abhydrolase_3^alpha/beta hydrolase fold^74-302^E:5.3e-59	GO:0016787^molecular_function^hydrolase activity	CXE15_ARATH^CXE15_ARATH^Q:147-1118,H:3-325^55.758%ID^E:7.96e-106^RecName: Full=Probable carboxylesterase 15;^Eukaryota; Viridiplantae; Streptophyta; Embryophyta; Tracheophyta; Spermatophyta; Magnoliopsida; eudicotyledons; Gunneridae; Pentapetalae; rosids; malvids; Brassicales; Brassicaceae; Camelineae; Arabidopsis	CXE15_ARATH^CXE15_ARATH^Q:147-1118,H:3-325^55.758%ID^E:7.96e-106^RecName: Full=Probable carboxylesterase 15;^Eukaryota; Viridiplantae; Streptophyta; Embryophyta; Tracheophyta; Spermatophyta; Magnoliopsida; eudicotyledons; Gunneridae; Pentapetalae; rosids; malvids; Brassicales; Brassicaceae; Camelineae; Arabidopsis	0	0	0	106	168	148	194	261	605	5	13	3
Pl01G0000351900.v1	Pl01	41983620	41988459	Pl01G0000351900.1.v1	1-2118[+]	KEGG:ath:AT3G54720`KO:K01301	GO:0005789^cellular_component^endoplasmic reticulum membrane`GO:0016021^cellular_component^integral component of membrane`GO:0004180^molecular_function^carboxypeptidase activity`GO:0046872^molecular_function^metal ion binding`GO:0004181^molecular_function^metallocarboxypeptidase activity`GO:0009793^biological_process^embryo development ending in seed dormancy`GO:0009908^biological_process^flower …	PF02225.23^PA^PA domain^154-213^E:8.2e-06`PF04389.18^Peptidase_M28^Peptidase family M28^321-518^E:5.8e-22`PF04253.16^TFR_dimer^Transferrin receptor-like dimerisation domain^577-700^E:5.3e-28	.	GCP2_ARATH^GCP2_ARATH^Q:34-2115,H:21-705^56.091%ID^E:0^RecName: Full=Probable glutamate carboxypeptidase AMP1 {ECO:0000305};^Eukaryota; Viridiplantae; Streptophyta; Embryophyta; Tracheophyta; Spermatophyta; Magnoliopsida; eudicotyledons; Gunneridae; Pentapetalae; rosids; malvids; Brassicales; Brassicaceae; Camelineae; Arabidopsis	GCP2_ARATH^GCP2_ARATH^Q:34-2115,H:21-705^56.091%ID^E:0^RecName: Full=Probable glutamate carboxypeptidase AMP1 {ECO:0000305};^Eukaryota; Viridiplantae; Streptophyta; Embryophyta; Tracheophyta; Spermatophyta; Magnoliopsida; eudicotyledons; Gunneridae; Pentapetalae; rosids; malvids; Brassicales; Brassicaceae; Camelineae; Arabidopsis	576	465	507	915	1821	1410	458	645	1508	3213	2258	2320
Pl01G0000354100.v1	Pl01	42158746	42166995	Pl01G0000354100.1.v1	71-2028[+]	KEGG:osa:4329672`KO:K14486	GO:0005634^cellular_component^nucleus`GO:0003677^molecular_function^DNA binding`GO:0009734^biological_process^auxin-activated signaling pathway`GO:0006355^biological_process^regulation of transcription, DNA-templated	PF02362.22^B3^B3 DNA binding domain^132-233^E:1e-22`PF06507.14^Auxin_resp^Auxin response factor^260-341^E:6.2e-26`PF02309.17^AUX_IAA^AUX/IAA family^568-661^E:1.4e-05	GO:0003677^molecular_function^DNA binding`GO:0006355^biological_process^regulation of transcription, DNA-templated`GO:0009725^biological_process^response to hormone`GO:0005634^cellular_component^nucleus	ARFG_ORYSJ^ARFG_ORYSJ^Q:137-2071,H:21-640^40.356%ID^E:9.73e-142^RecName: Full=Auxin response factor 7;^Eukaryota; Viridiplantae; Streptophyta; Embryophyta; Tracheophyta; Spermatophyta; Magnoliopsida; Liliopsida; Poales; Poaceae; BOP clade; Oryzoideae; Oryzeae; Oryzinae; Oryza; Oryza sativa	ARFG_ORYSJ^ARFG_ORYSJ^Q:137-2071,H:21-640^40.356%ID^E:9.73e-142^RecName: Full=Auxin response factor 7;^Eukaryota; Viridiplantae; Streptophyta; Embryophyta; Tracheophyta; Spermatophyta; Magnoliopsida; Liliopsida; Poales; Poaceae; BOP clade; Oryzoideae; Oryzeae; Oryzinae; Oryza; Oryza sativa	22	38	45	569	1057	881	117	167	378	1895	1087	880
Pl01G0000357700.v1	Pl01	42448553	42449751	Pl01G0000357700.1.v1	253-570[+]	KEGG:ath:AT2G47770	GO:0031969^cellular_component^chloroplast membrane`GO:0005783^cellular_component^endoplasmic reticulum`GO:0005789^cellular_component^endoplasmic reticulum membrane`GO:0005794^cellular_component^Golgi apparatus`GO:0000139^cellular_component^Golgi membrane`GO:0005795^cellular_component^Golgi stack`GO:0016021^cellular_component^integral component of membrane`GO:0016020^cellular_component^membrane`GO…	PF03073.16^TspO_MBR^TspO/MBR family^45-186^E:4e-25	GO:0016021^cellular_component^integral component of membrane	TSPO_ARATH^TSPO_ARATH^Q:253-810,H:1-193^44.33%ID^E:2.28e-38^RecName: Full=Translocator protein homolog;^Eukaryota; Viridiplantae; Streptophyta; Embryophyta; Tracheophyta; Spermatophyta; Magnoliopsida; eudicotyledons; Gunneridae; Pentapetalae; rosids; malvids; Brassicales; Brassicaceae; Camelineae; Arabidopsis	TSPO_ARATH^TSPO_ARATH^Q:253-810,H:1-193^44.33%ID^E:2.28e-38^RecName: Full=Translocator protein homolog;^Eukaryota; Viridiplantae; Streptophyta; Embryophyta; Tracheophyta; Spermatophyta; Magnoliopsida; eudicotyledons; Gunneridae; Pentapetalae; rosids; malvids; Brassicales; Brassicaceae; Camelineae; Arabidopsis	0	23	14	97	147	95	23	54	113	1323	687	834
Pl01G0000358600.v1	Pl01	42512539	42518566	Pl01G0000358600.1.v1	1-4524[+]	KEGG:ath:AT2G47800	GO:0005829^cellular_component^cytosol`GO:0005794^cellular_component^Golgi apparatus`GO:0016021^cellular_component^integral component of membrane`GO:0016020^cellular_component^membrane`GO:0000325^cellular_component^plant-type vacuole`GO:0005886^cellular_component^plasma membrane`GO:0009506^cellular_component^plasmodesma`GO:0005774^cellular_component^vacuolar membrane`GO:0005773^cellular_component^…	PF00664.24^ABC_membrane^ABC transporter transmembrane region^328-595^E:3.4e-21`PF00005.28^ABC_tran^ABC transporter^660-793^E:2.6e-21`PF00664.24^ABC_membrane^ABC transporter transmembrane region^949-1203^E:2.6e-28`PF00005.28^ABC_tran^ABC transporter^1282-1430^E:3.2e-28	GO:0005524^molecular_function^ATP binding`GO:0042626^molecular_function^ATPase-coupled transmembrane transporter activity`GO:0055085^biological_process^transmembrane transport`GO:0016021^cellular_component^integral component of membrane`GO:0016887^molecular_function^ATPase activity	AB4C_ARATH^AB4C_ARATH^Q:16-4521,H:11-1516^66.185%ID^E:0^RecName: Full=ABC transporter C family member 4;^Eukaryota; Viridiplantae; Streptophyta; Embryophyta; Tracheophyta; Spermatophyta; Magnoliopsida; eudicotyledons; Gunneridae; Pentapetalae; rosids; malvids; Brassicales; Brassicaceae; Camelineae; Arabidopsis	AB4C_ARATH^AB4C_ARATH^Q:16-4521,H:11-1516^66.185%ID^E:0^RecName: Full=ABC transporter C family member 4;^Eukaryota; Viridiplantae; Streptophyta; Embryophyta; Tracheophyta; Spermatophyta; Magnoliopsida; eudicotyledons; Gunneridae; Pentapetalae; rosids; malvids; Brassicales; Brassicaceae; Camelineae; Arabidopsis	162	76	101	47	55	61	120	204	388	30	7	18
Pl01G0000358800.v1	Pl01	42529981	42531983	Pl01G0000358800.1.v1	102-489[+]	KEGG:ath:AT3G01520	GO:0005829^cellular_component^cytosol`GO:0005886^cellular_component^plasma membrane`GO:0016208^molecular_function^AMP binding	PF00582.27^Usp^Universal stress protein family^9-156^E:1.1e-28	.	USPAL_ARATH^USPAL_ARATH^Q:411-572,H:110-163^42.593%ID^E:8.25e-10^RecName: Full=Universal stress protein A-like protein;^Eukaryota; Viridiplantae; Streptophyta; Embryophyta; Tracheophyta; Spermatophyta; Magnoliopsida; eudicotyledons; Gunneridae; Pentapetalae; rosids; malvids; Brassicales; Brassicaceae; Camelineae; Arabidopsis	USPAL_ARATH^USPAL_ARATH^Q:411-572,H:110-163^42.593%ID^E:8.25e-10^RecName: Full=Universal stress protein A-like protein;^Eukaryota; Viridiplantae; Streptophyta; Embryophyta; Tracheophyta; Spermatophyta; Magnoliopsida; eudicotyledons; Gunneridae; Pentapetalae; rosids; malvids; Brassicales; Brassicaceae; Camelineae; Arabidopsis	615	537	598	2436	3242	2645	1340	2465	5471	1861	1286	1396
Pl01G0000359800.v1	Pl01	42604739	42605191	Pl01G0000359800.1.v1	1-453[+]	KEGG:ath:AT5G01610	.	PF04398.13^DUF538^Protein of unknown function, DUF538^20-125^E:1.1e-35	.	Y5161_ARATH^Y5161_ARATH^Q:64-315,H:56-139^31.765%ID^E:2.91e-09^RecName: Full=Uncharacterized protein At5g01610;^Eukaryota; Viridiplantae; Streptophyta; Embryophyta; Tracheophyta; Spermatophyta; Magnoliopsida; eudicotyledons; Gunneridae; Pentapetalae; rosids; malvids; Brassicales; Brassicaceae; Camelineae; Arabidopsis	Y5161_ARATH^Y5161_ARATH^Q:64-315,H:56-139^31.765%ID^E:2.91e-09^RecName: Full=Uncharacterized protein At5g01610;^Eukaryota; Viridiplantae; Streptophyta; Embryophyta; Tracheophyta; Spermatophyta; Magnoliopsida; eudicotyledons; Gunneridae; Pentapetalae; rosids; malvids; Brassicales; Brassicaceae; Camelineae; Arabidopsis	717	553	552	158	249	197	842	1319	2837	127	74	81
Pl01G0000361100.v1	Pl01	42693890	42698049	Pl01G0000361100.1.v1	109-1803[+]	KEGG:ath:AT4G02300	GO:0005618^cellular_component^cell wall`GO:0005576^cellular_component^extracellular region`GO:0045330^molecular_function^aspartyl esterase activity`GO:0030599^molecular_function^pectinesterase activity`GO:0046910^molecular_function^pectinesterase inhibitor activity`GO:0042545^biological_process^cell wall modification`GO:0050829^biological_process^defense response to Gram-negative bacterium`GO:004…	PF04043.16^PMEI^Plant invertase/pectin methylesterase inhibitor^93-240^E:3e-27`PF01095.20^Pectinesterase^Pectinesterase^288-585^E:4.1e-146	GO:0004857^molecular_function^enzyme inhibitor activity`GO:0030599^molecular_function^pectinesterase activity`GO:0042545^biological_process^cell wall modification	PME39_ARATH^PME39_ARATH^Q:457-1905,H:50-532^56.795%ID^E:0^RecName: Full=Probable pectinesterase/pectinesterase inhibitor 39;^Eukaryota; Viridiplantae; Streptophyta; Embryophyta; Tracheophyta; Spermatophyta; Magnoliopsida; eudicotyledons; Gunneridae; Pentapetalae; rosids; malvids; Brassicales; Brassicaceae; Camelineae; Arabidopsis	PME39_ARATH^PME39_ARATH^Q:457-1905,H:50-532^56.795%ID^E:0^RecName: Full=Probable pectinesterase/pectinesterase inhibitor 39;^Eukaryota; Viridiplantae; Streptophyta; Embryophyta; Tracheophyta; Spermatophyta; Magnoliopsida; eudicotyledons; Gunneridae; Pentapetalae; rosids; malvids; Brassicales; Brassicaceae; Camelineae; Arabidopsis	28903	23556	25051	16364	23847	22112	12625	18649	38195	3384	2843	2276
Pl01G0000361200.v1	Pl01	42702432	42705042	Pl01G0000361200.1.v1	233-1500[+]	KEGG:ath:AT4G02290	GO:0005576^cellular_component^extracellular region`GO:0008810^molecular_function^cellulase activity`GO:0071555^biological_process^cell wall organization`GO:0030245^biological_process^cellulose catabolic process	PF00759.20^Glyco_hydro_9^Glycosyl hydrolase family 9^38-488^E:3.1e-147	GO:0004553^molecular_function^hydrolase activity, hydrolyzing O-glycosyl compounds`GO:0005975^biological_process^carbohydrate metabolic process	GUN17_ARATH^GUN17_ARATH^Q:341-1729,H:52-516^80.43%ID^E:0^RecName: Full=Endoglucanase 17;^Eukaryota; Viridiplantae; Streptophyta; Embryophyta; Tracheophyta; Spermatophyta; Magnoliopsida; eudicotyledons; Gunneridae; Pentapetalae; rosids; malvids; Brassicales; Brassicaceae; Camelineae; Arabidopsis	GUN17_ARATH^GUN17_ARATH^Q:341-1729,H:52-516^80.43%ID^E:0^RecName: Full=Endoglucanase 17;^Eukaryota; Viridiplantae; Streptophyta; Embryophyta; Tracheophyta; Spermatophyta; Magnoliopsida; eudicotyledons; Gunneridae; Pentapetalae; rosids; malvids; Brassicales; Brassicaceae; Camelineae; Arabidopsis	478	371	415	154	161	182	245	415	925	44	71	82
Pl01G0000361300.v1	Pl01	42706585	42711946	Pl01G0000361300.1.v1	1-2451[+]	.	GO:0016157^molecular_function^sucrose synthase activity`GO:0005985^biological_process^sucrose metabolic process	PF00862.20^Sucrose_synth^Sucrose synthase^12-559^E:2.7e-291`PF00534.21^Glycos_transf_1^Glycosyl transferases group 1^572-746^E:2.6e-31`PF13692.7^Glyco_trans_1_4^Glycosyl transferases group 1^577-731^E:2.3e-09	GO:0016157^molecular_function^sucrose synthase activity`GO:0005985^biological_process^sucrose metabolic process	SUS2_PEA^SUS2_PEA^Q:22-2415,H:5-802^88.722%ID^E:0^RecName: Full=Sucrose synthase 2;^Eukaryota; Viridiplantae; Streptophyta; Embryophyta; Tracheophyta; Spermatophyta; Magnoliopsida; eudicotyledons; Gunneridae; Pentapetalae; rosids; fabids; Fabales; Fabaceae; Papilionoideae; 50 kb inversion clade; NPAAA clade; Hologalegina; IRL clade; Fabeae; Pisum	SUS2_PEA^SUS2_PEA^Q:22-2415,H:5-802^88.722%ID^E:0^RecName: Full=Sucrose synthase 2;^Eukaryota; Viridiplantae; Streptophyta; Embryophyta; Tracheophyta; Spermatophyta; Magnoliopsida; eudicotyledons; Gunneridae; Pentapetalae; rosids; fabids; Fabales; Fabaceae; Papilionoideae; 50 kb inversion clade; NPAAA clade; Hologalegina; IRL clade; Fabeae; Pisum	1750	1374	1581	4069	6491	5279	1319	1721	3382	8770	6452	5807
Pl01G0000362700.v1	Pl01	42854233	42855201	Pl01G0000362700.1.v1	69-444[+]	.	.	.	.	.	.	116	110	105	246	382	285	1667	2686	6394	1486	1446	1215
Pl01G0000363000.v1	Pl01	42869708	42870299	Pl01G0000363000.1.v1	29-543[+]	KEGG:ath:AT1G67030	GO:0022626^cellular_component^cytosolic ribosome`GO:0005634^cellular_component^nucleus`GO:0003700^molecular_function^DNA-binding transcription factor activity`GO:0046872^molecular_function^metal ion binding`GO:0000976^molecular_function^transcription regulatory region sequence-specific DNA binding`GO:0009738^biological_process^abscisic acid-activated signaling pathway`GO:0009736^biological_proces…	PF13912.7^zf-C2H2_6^C2H2-type zinc finger^38-63^E:2.1e-05`PF00096.27^zf-C2H2^Zinc finger, C2H2 type^38-60^E:0.0029	GO:0003676^molecular_function^nucleic acid binding	ZFP6_ARATH^ZFP6_ARATH^Q:47-244,H:3-75^52.055%ID^E:5.75e-13^RecName: Full=Zinc finger protein 6 {ECO:0000305};^Eukaryota; Viridiplantae; Streptophyta; Embryophyta; Tracheophyta; Spermatophyta; Magnoliopsida; eudicotyledons; Gunneridae; Pentapetalae; rosids; malvids; Brassicales; Brassicaceae; Camelineae; Arabidopsis	ZFP6_ARATH^ZFP6_ARATH^Q:47-244,H:3-75^52.055%ID^E:5.75e-13^RecName: Full=Zinc finger protein 6 {ECO:0000305};^Eukaryota; Viridiplantae; Streptophyta; Embryophyta; Tracheophyta; Spermatophyta; Magnoliopsida; eudicotyledons; Gunneridae; Pentapetalae; rosids; malvids; Brassicales; Brassicaceae; Camelineae; Arabidopsis	101	113	81	22	28	22	73	69	136	6	17	6
Pl01G0000363300.v1	Pl01	42882932	42887251	Pl01G0000363300.1.v1	138-906[+]	KEGG:ath:AT2G47460`KO:K09422	GO:0005634^cellular_component^nucleus`GO:0003700^molecular_function^DNA-binding transcription factor activity`GO:0043565^molecular_function^sequence-specific DNA binding`GO:0000976^molecular_function^transcription regulatory region sequence-specific DNA binding`GO:0030154^biological_process^cell differentiation`GO:0009813^biological_process^flavonoid biosynthetic process`GO:0051555^biological_pro…	PF00249.32^Myb_DNA-binding^Myb-like DNA-binding domain^14-61^E:1.4e-12`PF13921.7^Myb_DNA-bind_6^Myb-like DNA-binding domain^17-75^E:9.6e-09`PF00249.32^Myb_DNA-binding^Myb-like DNA-binding domain^68-112^E:2.1e-13`PF13921.7^Myb_DNA-bind_6^Myb-like DNA-binding domain^71-117^E:3.7e-08	.	MYB12_ARATH^MYB12_ARATH^Q:138-584,H:1-159^69.811%ID^E:2.21e-71^RecName: Full=Transcription factor MYB12 {ECO:0000303|PubMed:9839469};^Eukaryota; Viridiplantae; Streptophyta; Embryophyta; Tracheophyta; Spermatophyta; Magnoliopsida; eudicotyledons; Gunneridae; Pentapetalae; rosids; malvids; Brassicales; Brassicaceae; Camelineae; Arabidopsis	MYB12_ARATH^MYB12_ARATH^Q:138-584,H:1-159^69.811%ID^E:2.21e-71^RecName: Full=Transcription factor MYB12 {ECO:0000303|PubMed:9839469};^Eukaryota; Viridiplantae; Streptophyta; Embryophyta; Tracheophyta; Spermatophyta; Magnoliopsida; eudicotyledons; Gunneridae; Pentapetalae; rosids; malvids; Brassicales; Brassicaceae; Camelineae; Arabidopsis	208	174	115	32	47	41	115	186	386	16	39	10
Pl01G0000363800.v1	Pl01	42939504	42940094	Pl01G0000363800.1.v1	1-591[+]	.	.	PF14009.7^DUF4228^Domain of unknown function (DUF4228)^1-174^E:2.7e-29	.	.	.	156	157	165	45	56	47	121	167	324	11	7	5
Pl01G0000364300.v1	Pl01	42970370	42977739	Pl01G0000364300.1.v1	1-2073[+]	KEGG:ath:AT4G02030`KO:K20296	GO:0005829^cellular_component^cytosol`GO:1990745^cellular_component^EARP complex`GO:0000938^cellular_component^GARP complex`GO:0005770^cellular_component^late endosome`GO:0016020^cellular_component^membrane`GO:0055037^cellular_component^recycling endosome`GO:0005802^cellular_component^trans-Golgi network`GO:0006914^biological_process^autophagy`GO:0032456^biological_process^endocytic recycling`GO:…	PF08700.12^Vps51^Vps51/Vps67^45-130^E:2e-22`PF04124.13^Dor1^Dor1-like family^63-153^E:1.5e-05	GO:0017119^cellular_component^Golgi transport complex	VPS51_ARATH^VPS51_ARATH^Q:25-1296,H:8-435^59.955%ID^E:4.69e-158^RecName: Full=Vacuolar protein sorting-associated protein 51 homolog {ECO:0000303|PubMed:24757006};^Eukaryota; Viridiplantae; Streptophyta; Embryophyta; Tracheophyta; Spermatophyta; Magnoliopsida; eudicotyledons; Gunneridae; Pentapetalae; rosids; malvids; Brassicales; Brassicaceae; Camelineae; Arabidopsis`VPS51_ARATH^VPS51_ARATH^Q:13…	VPS51_ARATH^VPS51_ARATH^Q:25-1296,H:8-435^59.955%ID^E:4.69e-158^RecName: Full=Vacuolar protein sorting-associated protein 51 homolog {ECO:0000303|PubMed:24757006};^Eukaryota; Viridiplantae; Streptophyta; Embryophyta; Tracheophyta; Spermatophyta; Magnoliopsida; eudicotyledons; Gunneridae; Pentapetalae; rosids; malvids; Brassicales; Brassicaceae; Camelineae; Arabidopsis`VPS51_ARATH^VPS51_ARATH^Q:13…	0	9	9	11	24	18	103	86	195	106	59	67
Pl01G0000366100.v1	Pl01	43124090	43128122	Pl01G0000366100.1.v1;Pl01G0000366100.2.v1	779-2574[+];543-2553[+]	.;.	GO:0005737^cellular_component^cytoplasm`GO:0047268^molecular_function^galactinol-raffinose galactosyltransferase activity`GO:0009312^biological_process^oligosaccharide biosynthetic process`GO:0033532^biological_process^stachyose biosynthetic process;GO:0005737^cellular_component^cytoplasm`GO:0047268^molecular_function^galactinol-raffinose galactosyltransferase activity`GO:0009312^biological_proce…	PF05691.13^Raffinose_syn^Raffinose synthase or seed imbibition protein Sip1^21-840^E:0;PF05691.13^Raffinose_syn^Raffinose synthase or seed imbibition protein Sip1^14-833^E:0	.;.	STSYN_PEA^STSYN_PEA^Q:779-3343,H:1-851^74.096%ID^E:0^RecName: Full=Stachyose synthase;^Eukaryota; Viridiplantae; Streptophyta; Embryophyta; Tracheophyta; Spermatophyta; Magnoliopsida; eudicotyledons; Gunneridae; Pentapetalae; rosids; fabids; Fabales; Fabaceae; Papilionoideae; 50 kb inversion clade; NPAAA clade; Hologalegina; IRL clade; Fabeae; Pisum;STSYN_PEA^STSYN_PEA^Q:534-3086,H:6-851^74.326%I…	STSYN_PEA^STSYN_PEA^Q:779-3343,H:1-851^74.096%ID^E:0^RecName: Full=Stachyose synthase;^Eukaryota; Viridiplantae; Streptophyta; Embryophyta; Tracheophyta; Spermatophyta; Magnoliopsida; eudicotyledons; Gunneridae; Pentapetalae; rosids; fabids; Fabales; Fabaceae; Papilionoideae; 50 kb inversion clade; NPAAA clade; Hologalegina; IRL clade; Fabeae; Pisum;STSYN_PEA^STSYN_PEA^Q:534-3086,H:6-851^74.326%I…	109	90	90	101	177	68	366	530	1376	4829	2060	2143
Pl01G0000367500.v1	Pl01	43244475	43246291	Pl01G0000367500.1.v1;Pl01G0000367500.2.v1	100-1008[+];100-999[+]	KEGG:ath:AT2G47180`KO:K18819;KEGG:ath:AT2G47180`KO:K18819	GO:0005737^cellular_component^cytoplasm`GO:0047216^molecular_function^inositol 3-alpha-galactosyltransferase activity`GO:0046872^molecular_function^metal ion binding`GO:0006012^biological_process^galactose metabolic process`GO:0009737^biological_process^response to abscisic acid`GO:0009409^biological_process^response to cold`GO:0009408^biological_process^response to heat`GO:0006979^biological_pro…	PF01501.21^Glyco_transf_8^Glycosyl transferase family 8^29-271^E:6.2e-42;PF01501.21^Glyco_transf_8^Glycosyl transferase family 8^29-271^E:6e-42	GO:0016757^molecular_function^transferase activity, transferring glycosyl groups;GO:0016757^molecular_function^transferase activity, transferring glycosyl groups	GOLS1_ARATH^GOLS1_ARATH^Q:100-1104,H:1-344^75.072%ID^E:2.57e-179^RecName: Full=Galactinol synthase 1;^Eukaryota; Viridiplantae; Streptophyta; Embryophyta; Tracheophyta; Spermatophyta; Magnoliopsida; eudicotyledons; Gunneridae; Pentapetalae; rosids; malvids; Brassicales; Brassicaceae; Camelineae; Arabidopsis;GOLS1_ARATH^GOLS1_ARATH^Q:100-1053,H:1-325^77.607%ID^E:1.71e-176^RecName: Full=Galactinol …	GOLS1_ARATH^GOLS1_ARATH^Q:100-1104,H:1-344^75.072%ID^E:2.57e-179^RecName: Full=Galactinol synthase 1;^Eukaryota; Viridiplantae; Streptophyta; Embryophyta; Tracheophyta; Spermatophyta; Magnoliopsida; eudicotyledons; Gunneridae; Pentapetalae; rosids; malvids; Brassicales; Brassicaceae; Camelineae; Arabidopsis;GOLS1_ARATH^GOLS1_ARATH^Q:100-1053,H:1-325^77.607%ID^E:1.71e-176^RecName: Full=Galactinol …	143	75	133	1507	2495	2257	41	75	139	1040	980	968
Pl01G0000367900.v1	Pl01	43274760	43279470	Pl01G0000367900.1.v1	491-2172[+]	KEGG:ath:AT3G62270	GO:0016021^cellular_component^integral component of membrane`GO:0005886^cellular_component^plasma membrane`GO:0015301^molecular_function^anion:anion antiporter activity`GO:0080139^molecular_function^borate efflux transmembrane transporter activity`GO:0005452^molecular_function^inorganic anion exchanger activity`GO:0046713^biological_process^borate transport`GO:0048364^biological_process^root deve…	PF00955.22^HCO3_cotransp^HCO3- transporter family^2-180^E:3.2e-36`PF00955.22^HCO3_cotransp^HCO3- transporter family^202-373^E:2.2e-25`PF00955.22^HCO3_cotransp^HCO3- transporter family^462-552^E:1.1e-18	GO:0006820^biological_process^anion transport`GO:0016021^cellular_component^integral component of membrane	BOR2_ARATH^BOR2_ARATH^Q:491-2572,H:1-687^82.734%ID^E:0^RecName: Full=Probable boron transporter 2;^Eukaryota; Viridiplantae; Streptophyta; Embryophyta; Tracheophyta; Spermatophyta; Magnoliopsida; eudicotyledons; Gunneridae; Pentapetalae; rosids; malvids; Brassicales; Brassicaceae; Camelineae; Arabidopsis	BOR2_ARATH^BOR2_ARATH^Q:491-2572,H:1-687^82.734%ID^E:0^RecName: Full=Probable boron transporter 2;^Eukaryota; Viridiplantae; Streptophyta; Embryophyta; Tracheophyta; Spermatophyta; Magnoliopsida; eudicotyledons; Gunneridae; Pentapetalae; rosids; malvids; Brassicales; Brassicaceae; Camelineae; Arabidopsis	858	683	753	314	499	506	3555	5033	11261	2279	1615	1431
Pl01G0000368000.v1	Pl01	43286814	43287597	Pl01G0000368000.1.v1;Pl01G0000368000.2.v1	5-357[+];73-447[+]	.;.	.;.	PF15699.6^NPR1_interact^NPR1 interacting^11-115^E:5.9e-24;PF15699.6^NPR1_interact^NPR1 interacting^41-145^E:7e-24	GO:0010112^biological_process^regulation of systemic acquired resistance;GO:0010112^biological_process^regulation of systemic acquired resistance	.;.	.;.	26	40	45	84	106	58	960	1370	3010	1133	755	759
Pl01G0000370100.v1	Pl01	43455488	43461129	Pl01G0000370100.1.v1	100-3849[+]	KEGG:ath:AT1G02520`KO:K05658	GO:0005576^cellular_component^extracellular region`GO:0016021^cellular_component^integral component of membrane`GO:0005886^cellular_component^plasma membrane`GO:0009506^cellular_component^plasmodesma`GO:0005524^molecular_function^ATP binding`GO:0016887^molecular_function^ATPase activity`GO:0042626^molecular_function^ATPase-coupled transmembrane transporter activity`GO:0055085^biological_process^t…	PF00664.24^ABC_membrane^ABC transporter transmembrane region^63-336^E:1.7e-59`PF00005.28^ABC_tran^ABC transporter^404-552^E:7.9e-34`PF00664.24^ABC_membrane^ABC transporter transmembrane region^715-987^E:9.1e-60`PF00005.28^ABC_tran^ABC transporter^1056-1205^E:1.7e-35	GO:0005524^molecular_function^ATP binding`GO:0042626^molecular_function^ATPase-coupled transmembrane transporter activity`GO:0055085^biological_process^transmembrane transport`GO:0016021^cellular_component^integral component of membrane`GO:0016887^molecular_function^ATPase activity	AB11B_ARATH^AB11B_ARATH^Q:232-3942,H:41-1278^72.129%ID^E:0^RecName: Full=ABC transporter B family member 11;^Eukaryota; Viridiplantae; Streptophyta; Embryophyta; Tracheophyta; Spermatophyta; Magnoliopsida; eudicotyledons; Gunneridae; Pentapetalae; rosids; malvids; Brassicales; Brassicaceae; Camelineae; Arabidopsis	AB11B_ARATH^AB11B_ARATH^Q:232-3942,H:41-1278^72.129%ID^E:0^RecName: Full=ABC transporter B family member 11;^Eukaryota; Viridiplantae; Streptophyta; Embryophyta; Tracheophyta; Spermatophyta; Magnoliopsida; eudicotyledons; Gunneridae; Pentapetalae; rosids; malvids; Brassicales; Brassicaceae; Camelineae; Arabidopsis	127	125	119	105	99	128	21	18	79	7	4	12
Pl01G0000370800.v1	Pl01	43513114	43514296	Pl01G0000370800.1.v1	31-531[+]	KEGG:ath:AT3G62100`KO:K14484	GO:0005634^cellular_component^nucleus`GO:0003700^molecular_function^DNA-binding transcription factor activity`GO:0009734^biological_process^auxin-activated signaling pathway`GO:0009630^biological_process^gravitropism`GO:0009733^biological_process^response to auxin`GO:0048364^biological_process^root development`GO:0010262^biological_process^somatic embryogenesis	PF02309.17^AUX_IAA^AUX/IAA family^71-170^E:2.8e-28	.	IAA30_ARATH^IAA30_ARATH^Q:109-543,H:24-169^47.059%ID^E:2.25e-37^RecName: Full=Auxin-responsive protein IAA30;^Eukaryota; Viridiplantae; Streptophyta; Embryophyta; Tracheophyta; Spermatophyta; Magnoliopsida; eudicotyledons; Gunneridae; Pentapetalae; rosids; malvids; Brassicales; Brassicaceae; Camelineae; Arabidopsis	IAA30_ARATH^IAA30_ARATH^Q:109-543,H:24-169^47.059%ID^E:2.25e-37^RecName: Full=Auxin-responsive protein IAA30;^Eukaryota; Viridiplantae; Streptophyta; Embryophyta; Tracheophyta; Spermatophyta; Magnoliopsida; eudicotyledons; Gunneridae; Pentapetalae; rosids; malvids; Brassicales; Brassicaceae; Camelineae; Arabidopsis	28	25	27	10	28	22	34	55	112	252	134	178
Pl01G0000371800.v1	Pl01	43612454	43613838	Pl01G0000371800.1.v1	123-765[+]	KEGG:ath:AT4G01630	GO:0005618^cellular_component^cell wall`GO:0005576^cellular_component^extracellular region`GO:0016020^cellular_component^membrane`GO:0010311^biological_process^lateral root formation`GO:0009828^biological_process^plant-type cell wall loosening	PF03330.19^DPBB_1^Lytic transglycolase^62-150^E:4.1e-23`PF01357.22^Expansin_C^Expansin C-terminal domain^161-239^E:6.3e-25	.	EXP17_ARATH^EXP17_ARATH^Q:132-884,H:5-255^73.705%ID^E:8e-139^RecName: Full=Putative expansin-A17;^Eukaryota; Viridiplantae; Streptophyta; Embryophyta; Tracheophyta; Spermatophyta; Magnoliopsida; eudicotyledons; Gunneridae; Pentapetalae; rosids; malvids; Brassicales; Brassicaceae; Camelineae; Arabidopsis	EXP17_ARATH^EXP17_ARATH^Q:132-884,H:5-255^73.705%ID^E:8e-139^RecName: Full=Putative expansin-A17;^Eukaryota; Viridiplantae; Streptophyta; Embryophyta; Tracheophyta; Spermatophyta; Magnoliopsida; eudicotyledons; Gunneridae; Pentapetalae; rosids; malvids; Brassicales; Brassicaceae; Camelineae; Arabidopsis	0	4	0	253	424	370	0	13	15	4673	3569	1617
Pl01G0000371900.v1	Pl01	43620510	43622984	Pl01G0000371900.1.v1	12-1248[+]	KEGG:sly:543823`KO:K19355	GO:0005576^cellular_component^extracellular region`GO:0016985^molecular_function^mannan endo-1,4-beta-mannosidase activity`GO:0005975^biological_process^carbohydrate metabolic process	PF00150.19^Cellulase^Cellulase (glycosyl hydrolase family 5)^65-352^E:1.3e-14	GO:0004553^molecular_function^hydrolase activity, hydrolyzing O-glycosyl compounds`GO:0005975^biological_process^carbohydrate metabolic process	MAN4_SOLLC^MAN4_SOLLC^Q:153-1256,H:32-399^58.378%ID^E:1.05e-151^RecName: Full=Mannan endo-1,4-beta-mannosidase 4;^Eukaryota; Viridiplantae; Streptophyta; Embryophyta; Tracheophyta; Spermatophyta; Magnoliopsida; eudicotyledons; Gunneridae; Pentapetalae; asterids; lamiids; Solanales; Solanaceae; Solanoideae; Solaneae; Solanum; Solanum subgen. Lycopersicon	MAN4_SOLLC^MAN4_SOLLC^Q:153-1256,H:32-399^58.378%ID^E:1.05e-151^RecName: Full=Mannan endo-1,4-beta-mannosidase 4;^Eukaryota; Viridiplantae; Streptophyta; Embryophyta; Tracheophyta; Spermatophyta; Magnoliopsida; eudicotyledons; Gunneridae; Pentapetalae; asterids; lamiids; Solanales; Solanaceae; Solanoideae; Solaneae; Solanum; Solanum subgen. Lycopersicon	553	603	740	35325	51451	45371	21734	34493	70692	54886	39410	37694
Pl01G0000373200.v1	Pl01	43734850	43736394	Pl01G0000373200.1.v1	1-1545[+]	.	GO:0000155^molecular_function^phosphorelay sensor kinase activity`GO:0009881^molecular_function^photoreceptor activity`GO:0042803^molecular_function^protein homodimerization activity`GO:0009584^biological_process^detection of visible light`GO:0018298^biological_process^protein-chromophore linkage`GO:0017006^biological_process^protein-tetrapyrrole linkage`GO:0009585^biological_process^red, far-red…	PF08446.12^PAS_2^PAS fold^76-192^E:1.8e-37`PF01590.27^GAF^GAF domain^226-408^E:7.6e-33`PF00360.21^PHY^Phytochrome region^421-514^E:1.9e-21	GO:0006355^biological_process^regulation of transcription, DNA-templated`GO:0005515^molecular_function^protein binding`GO:0009584^biological_process^detection of visible light`GO:0018298^biological_process^protein-chromophore linkage	PHYA_LATSA^PHYA_LATSA^Q:76-1542,H:22-507^84.049%ID^E:0^RecName: Full=Phytochrome type A;^Eukaryota; Viridiplantae; Streptophyta; Embryophyta; Tracheophyta; Spermatophyta; Magnoliopsida; eudicotyledons; Gunneridae; Pentapetalae; rosids; fabids; Fabales; Fabaceae; Papilionoideae; 50 kb inversion clade; NPAAA clade; Hologalegina; IRL clade; Fabeae; Lathyrus	PHYA_LATSA^PHYA_LATSA^Q:76-1542,H:22-507^84.049%ID^E:0^RecName: Full=Phytochrome type A;^Eukaryota; Viridiplantae; Streptophyta; Embryophyta; Tracheophyta; Spermatophyta; Magnoliopsida; eudicotyledons; Gunneridae; Pentapetalae; rosids; fabids; Fabales; Fabaceae; Papilionoideae; 50 kb inversion clade; NPAAA clade; Hologalegina; IRL clade; Fabeae; Lathyrus	27	18	22	67	97	54	0	0	4	4	0	0
Pl01G0000373600.v1	Pl01	43767792	43772446	Pl01G0000373600.1.v1	270-1260[+]	KEGG:ath:AT3G05910	GO:0005576^cellular_component^extracellular region`GO:0009505^cellular_component^plant-type cell wall`GO:0052689^molecular_function^carboxylic ester hydrolase activity`GO:0052793^molecular_function^pectin acetylesterase activity`GO:0071555^biological_process^cell wall organization	PF03283.14^PAE^Pectinacetylesterase^54-398^E:5.8e-162	GO:0016787^molecular_function^hydrolase activity	PAE12_ARATH^PAE12_ARATH^Q:423-1526,H:49-415^75.815%ID^E:0^RecName: Full=Pectin acetylesterase 12 {ECO:0000303|PubMed:25115560};^Eukaryota; Viridiplantae; Streptophyta; Embryophyta; Tracheophyta; Spermatophyta; Magnoliopsida; eudicotyledons; Gunneridae; Pentapetalae; rosids; malvids; Brassicales; Brassicaceae; Camelineae; Arabidopsis	PAE12_ARATH^PAE12_ARATH^Q:423-1526,H:49-415^75.815%ID^E:0^RecName: Full=Pectin acetylesterase 12 {ECO:0000303|PubMed:25115560};^Eukaryota; Viridiplantae; Streptophyta; Embryophyta; Tracheophyta; Spermatophyta; Magnoliopsida; eudicotyledons; Gunneridae; Pentapetalae; rosids; malvids; Brassicales; Brassicaceae; Camelineae; Arabidopsis	1278	1000	1032	501	802	576	572	837	1582	143	87	113
Pl01G0000374200.v1	Pl01	43811640	43812060	Pl01G0000374200.1.v1	110-225[+]	.	.	.	.	.	.	35	11	33	27	49	53	18	17	38	0	0	0
Pl01G0000374300.v1	Pl01	43816762	43817037	Pl01G0000374300.1.v1	1-276[+]	.	.	.	.	.	.	85	86	105	119	147	147	45	96	186	24	39	11
Pl01G0000375100.v1	Pl01	43881096	43882676	Pl01G0000375100.1.v1	23-1182[+]	KEGG:sot:102588511`KO:K00789	GO:0005737^cellular_component^cytoplasm`GO:0005524^molecular_function^ATP binding`GO:0046872^molecular_function^metal ion binding`GO:0004478^molecular_function^methionine adenosyltransferase activity`GO:0006730^biological_process^one-carbon metabolic process`GO:0006556^biological_process^S-adenosylmethionine biosynthetic process	PF00438.21^S-AdoMet_synt_N^S-adenosylmethionine synthetase, N-terminal domain^4-101^E:2.1e-42`PF02772.17^S-AdoMet_synt_M^S-adenosylmethionine synthetase, central domain^117-238^E:2e-47`PF02773.17^S-AdoMet_synt_C^S-adenosylmethionine synthetase, C-terminal domain^240-381^E:1.1e-62	GO:0004478^molecular_function^methionine adenosyltransferase activity`GO:0006556^biological_process^S-adenosylmethionine biosynthetic process	METK1_SOLTU^METK1_SOLTU^Q:23-1201,H:1-393^94.656%ID^E:0^RecName: Full=S-adenosylmethionine synthase 1;^Eukaryota; Viridiplantae; Streptophyta; Embryophyta; Tracheophyta; Spermatophyta; Magnoliopsida; eudicotyledons; Gunneridae; Pentapetalae; asterids; lamiids; Solanales; Solanaceae; Solanoideae; Solaneae; Solanum	METK1_SOLTU^METK1_SOLTU^Q:23-1201,H:1-393^94.656%ID^E:0^RecName: Full=S-adenosylmethionine synthase 1;^Eukaryota; Viridiplantae; Streptophyta; Embryophyta; Tracheophyta; Spermatophyta; Magnoliopsida; eudicotyledons; Gunneridae; Pentapetalae; asterids; lamiids; Solanales; Solanaceae; Solanoideae; Solaneae; Solanum	5247	4242	4279	3146	5065	3667	1451	2365	5261	18976	9145	9561
Pl01G0000375900.v1	Pl01	43949545	43952557	Pl01G0000375900.1.v1	131-1086[+]	KEGG:ath:AT1G09380	GO:0016021^cellular_component^integral component of membrane`GO:0005886^cellular_component^plasma membrane`GO:0022857^molecular_function^transmembrane transporter activity	PF00892.21^EamA^EamA-like transporter family^7-148^E:8.9e-16`PF00892.21^EamA^EamA-like transporter family^183-321^E:2.5e-22	GO:0016020^cellular_component^membrane`GO:0016021^cellular_component^integral component of membrane	WTR2_ARATH^WTR2_ARATH^Q:137-1204,H:4-367^56.319%ID^E:1.07e-138^RecName: Full=WAT1-related protein At1g09380;^Eukaryota; Viridiplantae; Streptophyta; Embryophyta; Tracheophyta; Spermatophyta; Magnoliopsida; eudicotyledons; Gunneridae; Pentapetalae; rosids; malvids; Brassicales; Brassicaceae; Camelineae; Arabidopsis	WTR2_ARATH^WTR2_ARATH^Q:137-1204,H:4-367^56.319%ID^E:1.07e-138^RecName: Full=WAT1-related protein At1g09380;^Eukaryota; Viridiplantae; Streptophyta; Embryophyta; Tracheophyta; Spermatophyta; Magnoliopsida; eudicotyledons; Gunneridae; Pentapetalae; rosids; malvids; Brassicales; Brassicaceae; Camelineae; Arabidopsis	54	111	37	3920	5630	6404	2397	3012	8100	29554	18003	13805
Pl01G0000376000.v1	Pl01	43955442	43958416	Pl01G0000376000.1.v1	120-984[+]	KEGG:sly:100316891`KO:K18819	GO:0005737^cellular_component^cytoplasm`GO:0047216^molecular_function^inositol 3-alpha-galactosyltransferase activity`GO:0046872^molecular_function^metal ion binding`GO:0006012^biological_process^galactose metabolic process	PF01501.21^Glyco_transf_8^Glycosyl transferase family 8^27-268^E:2.6e-41	GO:0016757^molecular_function^transferase activity, transferring glycosyl groups	GOLS2_SOLLC^GOLS2_SOLLC^Q:120-1067,H:1-321^76.636%ID^E:0^RecName: Full=Galactinol synthase 2;^Eukaryota; Viridiplantae; Streptophyta; Embryophyta; Tracheophyta; Spermatophyta; Magnoliopsida; eudicotyledons; Gunneridae; Pentapetalae; asterids; lamiids; Solanales; Solanaceae; Solanoideae; Solaneae; Solanum; Solanum subgen. Lycopersicon	GOLS2_SOLLC^GOLS2_SOLLC^Q:120-1067,H:1-321^76.636%ID^E:0^RecName: Full=Galactinol synthase 2;^Eukaryota; Viridiplantae; Streptophyta; Embryophyta; Tracheophyta; Spermatophyta; Magnoliopsida; eudicotyledons; Gunneridae; Pentapetalae; asterids; lamiids; Solanales; Solanaceae; Solanoideae; Solaneae; Solanum; Solanum subgen. Lycopersicon	72	59	24	104	200	82	89	79	218	8932	3400	3851
Pl01G0000376600.v1	Pl01	43985490	43987463	Pl01G0000376600.1.v1	1-1932[+]	KEGG:ath:AT1G61040`KO:K15178	GO:0016593^cellular_component^Cdc73/Paf1 complex`GO:0005634^cellular_component^nucleus`GO:0003677^molecular_function^DNA binding`GO:1990269^molecular_function^RNA polymerase II C-terminal domain phosphoserine binding`GO:0009908^biological_process^flower development`GO:0009910^biological_process^negative regulation of flower development`GO:0045893^biological_process^positive regulation of transcri…	PF03126.19^Plus-3^Plus-3 domain^263-368^E:3.3e-29	GO:0003677^molecular_function^DNA binding	VIP5_ARATH^VIP5_ARATH^Q:766-1929,H:259-643^61.082%ID^E:6.5e-160^RecName: Full=Protein RTF1 homolog {ECO:0000305};^Eukaryota; Viridiplantae; Streptophyta; Embryophyta; Tracheophyta; Spermatophyta; Magnoliopsida; eudicotyledons; Gunneridae; Pentapetalae; rosids; malvids; Brassicales; Brassicaceae; Camelineae; Arabidopsis`VIP5_ARATH^VIP5_ARATH^Q:1-588,H:1-196^49.289%ID^E:3.28e-21^RecName: Full=Prote…	VIP5_ARATH^VIP5_ARATH^Q:766-1929,H:259-643^61.082%ID^E:6.5e-160^RecName: Full=Protein RTF1 homolog {ECO:0000305};^Eukaryota; Viridiplantae; Streptophyta; Embryophyta; Tracheophyta; Spermatophyta; Magnoliopsida; eudicotyledons; Gunneridae; Pentapetalae; rosids; malvids; Brassicales; Brassicaceae; Camelineae; Arabidopsis`VIP5_ARATH^VIP5_ARATH^Q:1-588,H:1-196^49.289%ID^E:3.28e-21^RecName: Full=Prote…	79	65	53	0	0	0	134	169	377	8	0	0
Pl01G0000377600.v1	Pl01	44084087	44085581	Pl01G0000377600.1.v1	149-954[+]	KEGG:sly:101248619`KO:K05953	GO:0030410^molecular_function^nicotianamine synthase activity`GO:0030418^biological_process^nicotianamine biosynthetic process	PF03059.17^NAS^Nicotianamine synthase protein^5-273^E:1.8e-128	GO:0030410^molecular_function^nicotianamine synthase activity`GO:0030418^biological_process^nicotianamine biosynthetic process	NAS_SOLLC^NAS_SOLLC^Q:149-1063,H:1-308^65.584%ID^E:2.04e-143^RecName: Full=Nicotianamine synthase;^Eukaryota; Viridiplantae; Streptophyta; Embryophyta; Tracheophyta; Spermatophyta; Magnoliopsida; eudicotyledons; Gunneridae; Pentapetalae; asterids; lamiids; Solanales; Solanaceae; Solanoideae; Solaneae; Solanum; Solanum subgen. Lycopersicon	NAS_SOLLC^NAS_SOLLC^Q:149-1063,H:1-308^65.584%ID^E:2.04e-143^RecName: Full=Nicotianamine synthase;^Eukaryota; Viridiplantae; Streptophyta; Embryophyta; Tracheophyta; Spermatophyta; Magnoliopsida; eudicotyledons; Gunneridae; Pentapetalae; asterids; lamiids; Solanales; Solanaceae; Solanoideae; Solaneae; Solanum; Solanum subgen. Lycopersicon	40	23	21	104	109	102	735	971	2181	493	423	378
Pl01G0000377800.v1	Pl01	44107896	44109237	Pl01G0000377800.1.v1	108-531[+]	KEGG:ath:AT3G01520	GO:0005829^cellular_component^cytosol`GO:0005886^cellular_component^plasma membrane`GO:0016208^molecular_function^AMP binding	PF00582.27^Usp^Universal stress protein family^9-166^E:1.6e-32	.	USPAL_ARATH^USPAL_ARATH^Q:135-608,H:7-163^29.167%ID^E:1.12e-13^RecName: Full=Universal stress protein A-like protein;^Eukaryota; Viridiplantae; Streptophyta; Embryophyta; Tracheophyta; Spermatophyta; Magnoliopsida; eudicotyledons; Gunneridae; Pentapetalae; rosids; malvids; Brassicales; Brassicaceae; Camelineae; Arabidopsis	USPAL_ARATH^USPAL_ARATH^Q:135-608,H:7-163^29.167%ID^E:1.12e-13^RecName: Full=Universal stress protein A-like protein;^Eukaryota; Viridiplantae; Streptophyta; Embryophyta; Tracheophyta; Spermatophyta; Magnoliopsida; eudicotyledons; Gunneridae; Pentapetalae; rosids; malvids; Brassicales; Brassicaceae; Camelineae; Arabidopsis	103	106	133	434	687	538	364	625	1324	1113	896	766
Pl01G0000378800.v1	Pl01	44156585	44160234	Pl01G0000378800.1.v1	93-1764[+]	KEGG:ath:AT5G26920	GO:0005634^cellular_component^nucleus`GO:0005516^molecular_function^calmodulin binding`GO:0003700^molecular_function^DNA-binding transcription factor activity`GO:0043565^molecular_function^sequence-specific DNA binding`GO:0009738^biological_process^abscisic acid-activated signaling pathway`GO:0071456^biological_process^cellular response to hypoxia`GO:0071219^biological_process^cellular response t…	PF07887.12^Calmodulin_bind^Calmodulin binding protein-like^91-381^E:5.5e-108	GO:0005516^molecular_function^calmodulin binding	CB60G_ARATH^CB60G_ARATH^Q:246-1811,H:45-557^32.545%ID^E:2.31e-71^RecName: Full=Calmodulin-binding protein 60 G {ECO:0000303|PubMed:11782485};^Eukaryota; Viridiplantae; Streptophyta; Embryophyta; Tracheophyta; Spermatophyta; Magnoliopsida; eudicotyledons; Gunneridae; Pentapetalae; rosids; malvids; Brassicales; Brassicaceae; Camelineae; Arabidopsis	CB60G_ARATH^CB60G_ARATH^Q:246-1811,H:45-557^32.545%ID^E:2.31e-71^RecName: Full=Calmodulin-binding protein 60 G {ECO:0000303|PubMed:11782485};^Eukaryota; Viridiplantae; Streptophyta; Embryophyta; Tracheophyta; Spermatophyta; Magnoliopsida; eudicotyledons; Gunneridae; Pentapetalae; rosids; malvids; Brassicales; Brassicaceae; Camelineae; Arabidopsis	73	15	34	195	285	251	170	441	898	63	53	62
Pl01G0000378900.v1	Pl01	44163304	44167266	Pl01G0000378900.1.v1;Pl01G0000378900.2.v1	240-1593[+];240-1626[+]	KEGG:ath:AT5G57580;KEGG:ath:AT5G57580	GO:0005634^cellular_component^nucleus`GO:0005516^molecular_function^calmodulin binding`GO:0003700^molecular_function^DNA-binding transcription factor activity`GO:0043565^molecular_function^sequence-specific DNA binding`GO:0080142^biological_process^regulation of salicylic acid biosynthetic process;GO:0005634^cellular_component^nucleus`GO:0005516^molecular_function^calmodulin binding`GO:0003700^mo…	PF07887.12^Calmodulin_bind^Calmodulin binding protein-like^76-366^E:6.2e-83;PF07887.12^Calmodulin_bind^Calmodulin binding protein-like^76-366^E:6.6e-83	GO:0005516^molecular_function^calmodulin binding;GO:0005516^molecular_function^calmodulin binding	CB60B_ARATH^CB60B_ARATH^Q:456-1460,H:91-430^37.283%ID^E:9.13e-49^RecName: Full=Calmodulin-binding protein 60 B {ECO:0000303|PubMed:11782485};^Eukaryota; Viridiplantae; Streptophyta; Embryophyta; Tracheophyta; Spermatophyta; Magnoliopsida; eudicotyledons; Gunneridae; Pentapetalae; rosids; malvids; Brassicales; Brassicaceae; Camelineae; Arabidopsis;CB60B_ARATH^CB60B_ARATH^Q:456-1460,H:91-430^37.283…	CB60B_ARATH^CB60B_ARATH^Q:456-1460,H:91-430^37.283%ID^E:9.13e-49^RecName: Full=Calmodulin-binding protein 60 B {ECO:0000303|PubMed:11782485};^Eukaryota; Viridiplantae; Streptophyta; Embryophyta; Tracheophyta; Spermatophyta; Magnoliopsida; eudicotyledons; Gunneridae; Pentapetalae; rosids; malvids; Brassicales; Brassicaceae; Camelineae; Arabidopsis;CB60B_ARATH^CB60B_ARATH^Q:456-1460,H:91-430^37.283…	3	0	0	0	0	0	788	1212	2543	1069	740	731
Pl01G0000379300.v1	Pl01	44197463	44199079	Pl01G0000379300.1.v1	386-483[+]	KEGG:hsa:414061`KO:K09509	.	PF00226.32^DnaJ^DnaJ domain^13-78^E:1.1e-24	.	DNJB3_HUMAN^DNJB3_HUMAN^Q:422-619,H:4-66^57.576%ID^E:4.89e-17^RecName: Full=DnaJ homolog subfamily B member 3;^Eukaryota; Metazoa; Chordata; Craniata; Vertebrata; Euteleostomi; Mammalia; Eutheria; Euarchontoglires; Primates; Haplorrhini; Catarrhini; Hominidae; Homo	DNJB3_HUMAN^DNJB3_HUMAN^Q:422-619,H:4-66^57.576%ID^E:4.89e-17^RecName: Full=DnaJ homolog subfamily B member 3;^Eukaryota; Metazoa; Chordata; Craniata; Vertebrata; Euteleostomi; Mammalia; Eutheria; Euarchontoglires; Primates; Haplorrhini; Catarrhini; Hominidae; Homo	322	291	314	655	986	766	356	707	1556	4189	1797	2070
Pl01G0000380700.v1	Pl01	44298206	44299927	Pl01G0000380700.1.v1;Pl01G0000380700.2.v1	88-600[+];74-597[+]	KEGG:ath:AT5G48720;KEGG:ath:AT5G48720	GO:0005634^cellular_component^nucleus`GO:0006281^biological_process^DNA repair`GO:0007143^biological_process^female meiotic nuclear division`GO:0007140^biological_process^male meiotic nuclear division`GO:0009555^biological_process^pollen development`GO:0010165^biological_process^response to X-ray;GO:0005634^cellular_component^nucleus`GO:0006281^biological_process^DNA repair`GO:0007143^biological_…	.;.	.;.	XRI1_ARATH^XRI1_ARATH^Q:445-684,H:226-300^48.148%ID^E:7.39e-11^RecName: Full=Protein XRI1;^Eukaryota; Viridiplantae; Streptophyta; Embryophyta; Tracheophyta; Spermatophyta; Magnoliopsida; eudicotyledons; Gunneridae; Pentapetalae; rosids; malvids; Brassicales; Brassicaceae; Camelineae; Arabidopsis;XRI1_ARATH^XRI1_ARATH^Q:428-667,H:226-300^48.148%ID^E:6.05e-11^RecName: Full=Protein XRI1;^Eukaryota;…	XRI1_ARATH^XRI1_ARATH^Q:445-684,H:226-300^48.148%ID^E:7.39e-11^RecName: Full=Protein XRI1;^Eukaryota; Viridiplantae; Streptophyta; Embryophyta; Tracheophyta; Spermatophyta; Magnoliopsida; eudicotyledons; Gunneridae; Pentapetalae; rosids; malvids; Brassicales; Brassicaceae; Camelineae; Arabidopsis;XRI1_ARATH^XRI1_ARATH^Q:428-667,H:226-300^48.148%ID^E:6.05e-11^RecName: Full=Protein XRI1;^Eukaryota;…	242	192	185	1075	1173	1194	345	622	1311	1101	875	752
Pl01G0000381000.v1	Pl01	44315716	44319167	Pl01G0000381000.1.v1;Pl01G0000381000.2.v1;Pl01G0000381000.3.v1;Pl01G0000381000.4.v1	217-504[+];217-552[+];217-612[+];12-564[+]	KEGG:ath:AT1G03780`KO:K16812;KEGG:ath:AT1G03780`KO:K16812;KEGG:ath:AT1G03780`KO:K16812;KEGG:ath:AT1G03780`KO:K16812	GO:0009941^cellular_component^chloroplast envelope`GO:0005874^cellular_component^microtubule`GO:0005654^cellular_component^nucleoplasm`GO:0005634^cellular_component^nucleus`GO:0009524^cellular_component^phragmoplast`GO:0005819^cellular_component^spindle`GO:0008017^molecular_function^microtubule binding`GO:0032147^biological_process^activation of protein kinase activity`GO:0051301^biological_proce…	PF06886.12^TPX2^Targeting protein for Xklp2 (TPX2) domain^56-132^E:9.4e-20;PF06886.12^TPX2^Targeting protein for Xklp2 (TPX2) domain^72-148^E:1.2e-19;PF06886.12^TPX2^Targeting protein for Xklp2 (TPX2) domain^92-168^E:1.5e-19;PF06886.12^TPX2^Targeting protein for Xklp2 (TPX2) domain^76-152^E:1.2e-19	.;.;.;.	TPX2_ARATH^TPX2_ARATH^Q:367-606,H:642-721^37.5%ID^E:1.63e-06^RecName: Full=Protein TPX2;^Eukaryota; Viridiplantae; Streptophyta; Embryophyta; Tracheophyta; Spermatophyta; Magnoliopsida; eudicotyledons; Gunneridae; Pentapetalae; rosids; malvids; Brassicales; Brassicaceae; Camelineae; Arabidopsis;TPX2_ARATH^TPX2_ARATH^Q:415-654,H:642-721^37.5%ID^E:1.89e-06^RecName: Full=Protein TPX2;^Eukaryota; Vir…	TPX2_ARATH^TPX2_ARATH^Q:367-606,H:642-721^37.5%ID^E:1.63e-06^RecName: Full=Protein TPX2;^Eukaryota; Viridiplantae; Streptophyta; Embryophyta; Tracheophyta; Spermatophyta; Magnoliopsida; eudicotyledons; Gunneridae; Pentapetalae; rosids; malvids; Brassicales; Brassicaceae; Camelineae; Arabidopsis;TPX2_ARATH^TPX2_ARATH^Q:415-654,H:642-721^37.5%ID^E:1.89e-06^RecName: Full=Protein TPX2;^Eukaryota; Vir…	41	28	14	182	288	232	25	20	27	2769	2327	2318
Pl01G0000383700.v1	Pl01	44624157	44626150	Pl01G0000383700.1.v1	362-438[+]	KEGG:ath:AT4G22758	.	.	.	Y4276_ARATH^Y4276_ARATH^Q:419-685,H:117-204^31.461%ID^E:7.68e-06^RecName: Full=Uncharacterized protein At4g22758;^Eukaryota; Viridiplantae; Streptophyta; Embryophyta; Tracheophyta; Spermatophyta; Magnoliopsida; eudicotyledons; Gunneridae; Pentapetalae; rosids; malvids; Brassicales; Brassicaceae; Camelineae; Arabidopsis	Y4276_ARATH^Y4276_ARATH^Q:419-685,H:117-204^31.461%ID^E:7.68e-06^RecName: Full=Uncharacterized protein At4g22758;^Eukaryota; Viridiplantae; Streptophyta; Embryophyta; Tracheophyta; Spermatophyta; Magnoliopsida; eudicotyledons; Gunneridae; Pentapetalae; rosids; malvids; Brassicales; Brassicaceae; Camelineae; Arabidopsis	436	326	442	1830	2995	2690	1014	1747	4009	2579	2111	2006
Pl01G0000385100.v1	Pl01	44728538	44729066	Pl01G0000385100.1.v1	41-231[+]	.	.	.	.	.	.	93	87	109	223	360	209	250	349	1066	6089	2744	3165
Pl01G0000385900.v1	Pl01	44775400	44777336	Pl01G0000385900.1.v1	98-777[+]	KEGG:ath:AT2G39700	GO:0005829^cellular_component^cytosol`GO:0005576^cellular_component^extracellular region`GO:0016020^cellular_component^membrane`GO:0009505^cellular_component^plant-type cell wall`GO:0009506^cellular_component^plasmodesma`GO:0009664^biological_process^plant-type cell wall organization`GO:0006949^biological_process^syncytium formation	PF03330.19^DPBB_1^Lytic transglycolase^67-154^E:1.4e-22`PF01357.22^Expansin_C^Expansin C-terminal domain^165-242^E:2.3e-24	.	EXPA4_ARATH^EXPA4_ARATH^Q:107-871,H:3-257^80%ID^E:7.06e-153^RecName: Full=Expansin-A4;^Eukaryota; Viridiplantae; Streptophyta; Embryophyta; Tracheophyta; Spermatophyta; Magnoliopsida; eudicotyledons; Gunneridae; Pentapetalae; rosids; malvids; Brassicales; Brassicaceae; Camelineae; Arabidopsis	EXPA4_ARATH^EXPA4_ARATH^Q:107-871,H:3-257^80%ID^E:7.06e-153^RecName: Full=Expansin-A4;^Eukaryota; Viridiplantae; Streptophyta; Embryophyta; Tracheophyta; Spermatophyta; Magnoliopsida; eudicotyledons; Gunneridae; Pentapetalae; rosids; malvids; Brassicales; Brassicaceae; Camelineae; Arabidopsis	159	93	196	20	51	47	128	185	330	44	22	25
Pl01G0000387000.v1	Pl01	44912754	44914545	Pl01G0000387000.1.v1	138-1317[+]	KEGG:ath:AT5G02190	GO:0005783^cellular_component^endoplasmic reticulum`GO:0004190^molecular_function^aspartic-type endopeptidase activity`GO:0008233^molecular_function^peptidase activity`GO:0012501^biological_process^programmed cell death`GO:0030163^biological_process^protein catabolic process`GO:0006508^biological_process^proteolysis	PF14543.7^TAXi_N^Xylanase inhibitor N-terminal^69-231^E:8.9e-38`PF00026.24^Asp^Eukaryotic aspartyl protease^70-424^E:2.4e-16`PF14541.7^TAXi_C^Xylanase inhibitor C-terminal^259-423^E:3.5e-37	.	PCS1L_ARATH^PCS1L_ARATH^Q:309-1445,H:64-451^62.887%ID^E:1.86e-148^RecName: Full=Aspartic proteinase PCS1;^Eukaryota; Viridiplantae; Streptophyta; Embryophyta; Tracheophyta; Spermatophyta; Magnoliopsida; eudicotyledons; Gunneridae; Pentapetalae; rosids; malvids; Brassicales; Brassicaceae; Camelineae; Arabidopsis	PCS1L_ARATH^PCS1L_ARATH^Q:309-1445,H:64-451^62.887%ID^E:1.86e-148^RecName: Full=Aspartic proteinase PCS1;^Eukaryota; Viridiplantae; Streptophyta; Embryophyta; Tracheophyta; Spermatophyta; Magnoliopsida; eudicotyledons; Gunneridae; Pentapetalae; rosids; malvids; Brassicales; Brassicaceae; Camelineae; Arabidopsis	356	249	259	236	482	408	222	407	792	71	100	29
Pl01G0000387900.v1	Pl01	44972996	44975805	Pl01G0000387900.1.v1	898-861[+]	KEGG:ath:AT3G55560	GO:0005634^cellular_component^nucleus`GO:0003680^molecular_function^minor groove of adenine-thymine-rich DNA binding`GO:0003700^molecular_function^DNA-binding transcription factor activity`GO:0045087^biological_process^innate immune response`GO:0045824^biological_process^negative regulation of innate immune response	PF03479.16^PCC^Plants and Prokaryotes Conserved (PCC) domain^101-213^E:5.7e-29	.	AHL15_ARATH^AHL15_ARATH^Q:1165-1725,H:105-300^61.735%ID^E:5.9e-52^RecName: Full=AT-hook motif nuclear-localized protein 15 {ECO:0000312|EMBL:FAA00286.1};^Eukaryota; Viridiplantae; Streptophyta; Embryophyta; Tracheophyta; Spermatophyta; Magnoliopsida; eudicotyledons; Gunneridae; Pentapetalae; rosids; malvids; Brassicales; Brassicaceae; Camelineae; Arabidopsis	AHL15_ARATH^AHL15_ARATH^Q:1165-1725,H:105-300^61.735%ID^E:5.9e-52^RecName: Full=AT-hook motif nuclear-localized protein 15 {ECO:0000312|EMBL:FAA00286.1};^Eukaryota; Viridiplantae; Streptophyta; Embryophyta; Tracheophyta; Spermatophyta; Magnoliopsida; eudicotyledons; Gunneridae; Pentapetalae; rosids; malvids; Brassicales; Brassicaceae; Camelineae; Arabidopsis	22	15	21	456	659	608	214	461	1231	4776	2112	2132
Pl01G0000389100.v1	Pl01	45068600	45070175	Pl01G0000389100.1.v1	1-1251[+]	KEGG:ath:AT1G07430`KO:K14497	GO:0005829^cellular_component^cytosol`GO:0005634^cellular_component^nucleus`GO:0005886^cellular_component^plasma membrane`GO:0004724^molecular_function^magnesium-dependent protein serine/threonine phosphatase activity`GO:0046872^molecular_function^metal ion binding`GO:0004722^molecular_function^protein serine/threonine phosphatase activity`GO:0009788^biological_process^negative regulation of absc…	PF00481.22^PP2C^Protein phosphatase 2C^107-391^E:3.3e-60	GO:0003824^molecular_function^catalytic activity	P2C03_ARATH^P2C03_ARATH^Q:316-1203,H:119-435^60.429%ID^E:6.83e-132^RecName: Full=Protein phosphatase 2C 3 {ECO:0000303|PubMed:19021904};^Eukaryota; Viridiplantae; Streptophyta; Embryophyta; Tracheophyta; Spermatophyta; Magnoliopsida; eudicotyledons; Gunneridae; Pentapetalae; rosids; malvids; Brassicales; Brassicaceae; Camelineae; Arabidopsis	P2C03_ARATH^P2C03_ARATH^Q:316-1203,H:119-435^60.429%ID^E:6.83e-132^RecName: Full=Protein phosphatase 2C 3 {ECO:0000303|PubMed:19021904};^Eukaryota; Viridiplantae; Streptophyta; Embryophyta; Tracheophyta; Spermatophyta; Magnoliopsida; eudicotyledons; Gunneridae; Pentapetalae; rosids; malvids; Brassicales; Brassicaceae; Camelineae; Arabidopsis	3483	2778	2971	2687	4236	3666	2866	4122	9150	24948	15155	14704
Pl01G0000391800.v1	Pl01	45263446	45265877	Pl01G0000391800.1.v1	320-465[+]	.	.	.	.	.	.	67	56	63	246	349	335	261	466	1073	3185	2241	2251
Pl01G0000394200.v1	Pl01	45490309	45492409	Pl01G0000394200.1.v1	184-1410[+]	KEGG:ath:AT3G50280	GO:0016747^molecular_function^transferase activity, transferring acyl groups other than amino-acyl groups	PF02458.16^Transferase^Transferase family^15-464^E:4.9e-107	GO:0016747^molecular_function^transferase activity, transferring acyl groups other than amino-acyl groups	Y3028_ARATH^Y3028_ARATH^Q:226-1575,H:4-439^32.839%ID^E:6.66e-65^RecName: Full=Uncharacterized acetyltransferase At3g50280;^Eukaryota; Viridiplantae; Streptophyta; Embryophyta; Tracheophyta; Spermatophyta; Magnoliopsida; eudicotyledons; Gunneridae; Pentapetalae; rosids; malvids; Brassicales; Brassicaceae; Camelineae; Arabidopsis	Y3028_ARATH^Y3028_ARATH^Q:226-1575,H:4-439^32.839%ID^E:6.66e-65^RecName: Full=Uncharacterized acetyltransferase At3g50280;^Eukaryota; Viridiplantae; Streptophyta; Embryophyta; Tracheophyta; Spermatophyta; Magnoliopsida; eudicotyledons; Gunneridae; Pentapetalae; rosids; malvids; Brassicales; Brassicaceae; Camelineae; Arabidopsis	63	58	54	36	92	70	455	719	1645	215	177	230
Pl01G0000394300.v1	Pl01	45501259	45503464	Pl01G0000394300.1.v1	225-1431[+]	KEGG:ath:AT3G50280	GO:0016747^molecular_function^transferase activity, transferring acyl groups other than amino-acyl groups	PF02458.16^Transferase^Transferase family^10-464^E:6.6e-108	GO:0016747^molecular_function^transferase activity, transferring acyl groups other than amino-acyl groups	Y3028_ARATH^Y3028_ARATH^Q:255-1616,H:4-439^32.143%ID^E:1.69e-64^RecName: Full=Uncharacterized acetyltransferase At3g50280;^Eukaryota; Viridiplantae; Streptophyta; Embryophyta; Tracheophyta; Spermatophyta; Magnoliopsida; eudicotyledons; Gunneridae; Pentapetalae; rosids; malvids; Brassicales; Brassicaceae; Camelineae; Arabidopsis	Y3028_ARATH^Y3028_ARATH^Q:255-1616,H:4-439^32.143%ID^E:1.69e-64^RecName: Full=Uncharacterized acetyltransferase At3g50280;^Eukaryota; Viridiplantae; Streptophyta; Embryophyta; Tracheophyta; Spermatophyta; Magnoliopsida; eudicotyledons; Gunneridae; Pentapetalae; rosids; malvids; Brassicales; Brassicaceae; Camelineae; Arabidopsis	12	52	25	980	1723	1367	270	320	981	10714	6939	5662
Pl01G0000394800.v1	Pl01	45530926	45532108	Pl01G0000394800.1.v1	155-597[+]	KEGG:ath:AT1G48120	GO:0005829^cellular_component^cytosol`GO:0005634^cellular_component^nucleus`GO:0046872^molecular_function^metal ion binding`GO:0004722^molecular_function^protein serine/threonine phosphatase activity	.	.	PPP7L_ARATH^PPP7L_ARATH^Q:23-391,H:318-440^35.714%ID^E:7.86e-14^RecName: Full=Serine/threonine-protein phosphatase 7 long form homolog;^Eukaryota; Viridiplantae; Streptophyta; Embryophyta; Tracheophyta; Spermatophyta; Magnoliopsida; eudicotyledons; Gunneridae; Pentapetalae; rosids; malvids; Brassicales; Brassicaceae; Camelineae; Arabidopsis	PPP7L_ARATH^PPP7L_ARATH^Q:23-391,H:318-440^35.714%ID^E:7.86e-14^RecName: Full=Serine/threonine-protein phosphatase 7 long form homolog;^Eukaryota; Viridiplantae; Streptophyta; Embryophyta; Tracheophyta; Spermatophyta; Magnoliopsida; eudicotyledons; Gunneridae; Pentapetalae; rosids; malvids; Brassicales; Brassicaceae; Camelineae; Arabidopsis	0	0	0	0	0	0	153	199	456	142	118	95
Pl01G0000395200.v1	Pl01	45567012	45570632	Pl01G0000395200.1.v1	12-1431[+]	.	GO:0016021^cellular_component^integral component of membrane`GO:0005886^cellular_component^plasma membrane`GO:0015293^molecular_function^symporter activity`GO:0006865^biological_process^amino acid transport`GO:0009734^biological_process^auxin-activated signaling pathway	PF01490.19^Aa_trans^Transmembrane amino acid transporter protein^42-435^E:2.2e-78	.	LAX1_MEDTR^LAX1_MEDTR^Q:12-1439,H:1-479^87.474%ID^E:0^RecName: Full=Auxin transporter-like protein 1;^Eukaryota; Viridiplantae; Streptophyta; Embryophyta; Tracheophyta; Spermatophyta; Magnoliopsida; eudicotyledons; Gunneridae; Pentapetalae; rosids; fabids; Fabales; Fabaceae; Papilionoideae; 50 kb inversion clade; NPAAA clade; Hologalegina; IRL clade; Trifolieae; Medicago	LAX1_MEDTR^LAX1_MEDTR^Q:12-1439,H:1-479^87.474%ID^E:0^RecName: Full=Auxin transporter-like protein 1;^Eukaryota; Viridiplantae; Streptophyta; Embryophyta; Tracheophyta; Spermatophyta; Magnoliopsida; eudicotyledons; Gunneridae; Pentapetalae; rosids; fabids; Fabales; Fabaceae; Papilionoideae; 50 kb inversion clade; NPAAA clade; Hologalegina; IRL clade; Trifolieae; Medicago	686	650	690	237	504	345	154	207	403	205	138	120
Pl01G0000396100.v1	Pl01	45640355	45642819	Pl01G0000396100.1.v1;Pl01G0000396100.2.v1	363-654[+];176-387[+]	.;.	.;.	PF10457.10^MENTAL^Cholesterol-capturing domain^73-139^E:6.6e-05;.	.;.	.;.	.;.	82	26	29	124	204	170	294	290	950	287	181	172
Pl01G0000398400.v1	Pl01	45832108	45833734	Pl01G0000398400.1.v1	158-525[+]	KEGG:ath:AT3G11110	GO:0016021^cellular_component^integral component of membrane`GO:0046872^molecular_function^metal ion binding`GO:0016740^molecular_function^transferase activity`GO:0016567^biological_process^protein ubiquitination	PF13639.7^zf-RING_2^Ring finger domain^106-149^E:5.6e-13`PF17123.6^zf-RING_11^RING-like zinc finger^106-135^E:1e-10`PF13923.7^zf-C3HC4_2^Zinc finger, C3HC4 type (RING finger)^106-148^E:8.3e-09`PF00097.26^zf-C3HC4^Zinc finger, C3HC4 type (RING finger)^107-148^E:6.7e-05`PF13445.7^zf-RING_UBOX^RING-type zinc-finger^107-146^E:0.00012	GO:0046872^molecular_function^metal ion binding	ATL66_ARATH^ATL66_ARATH^Q:152-628,H:1-157^41.358%ID^E:2.81e-32^RecName: Full=RING-H2 finger protein ATL66;^Eukaryota; Viridiplantae; Streptophyta; Embryophyta; Tracheophyta; Spermatophyta; Magnoliopsida; eudicotyledons; Gunneridae; Pentapetalae; rosids; malvids; Brassicales; Brassicaceae; Camelineae; Arabidopsis	ATL66_ARATH^ATL66_ARATH^Q:152-628,H:1-157^41.358%ID^E:2.81e-32^RecName: Full=RING-H2 finger protein ATL66;^Eukaryota; Viridiplantae; Streptophyta; Embryophyta; Tracheophyta; Spermatophyta; Magnoliopsida; eudicotyledons; Gunneridae; Pentapetalae; rosids; malvids; Brassicales; Brassicaceae; Camelineae; Arabidopsis	77	54	61	246	418	302	139	266	644	553	446	424
Pl01G0000399900.v1	Pl01	45958398	45960650	Pl01G0000399900.1.v1	1-819[+]	KEGG:dre:327437`KO:K11347	GO:0042995^cellular_component^cell projection`GO:0005694^cellular_component^chromosome`GO:0005737^cellular_component^cytoplasm`GO:0005856^cellular_component^cytoskeleton`GO:0005634^cellular_component^nucleus`GO:0046872^molecular_function^metal ion binding`GO:0006915^biological_process^apoptotic process`GO:0060828^biological_process^regulation of canonical Wnt signaling pathway	PF13832.7^zf-HC5HC2H_2^PHD-zinc-finger like domain^89-161^E:4.2e-10`PF13771.7^zf-HC5HC2H^PHD-like zinc-binding domain^110-161^E:6e-10	.	JADE1_DANRE^JADE1_DANRE^Q:265-480,H:257-322^41.667%ID^E:4.52e-12^RecName: Full=Protein Jade-1;^Eukaryota; Metazoa; Chordata; Craniata; Vertebrata; Euteleostomi; Actinopterygii; Neopterygii; Teleostei; Ostariophysi; Cypriniformes; Cyprinidae; Danio	JADE1_DANRE^JADE1_DANRE^Q:265-480,H:257-322^41.667%ID^E:4.52e-12^RecName: Full=Protein Jade-1;^Eukaryota; Metazoa; Chordata; Craniata; Vertebrata; Euteleostomi; Actinopterygii; Neopterygii; Teleostei; Ostariophysi; Cypriniformes; Cyprinidae; Danio	77	48	67	54	113	77	441	849	1722	1583	997	1004
Pl01G0000400000.v1	Pl01	45961077	45967042	Pl01G0000400000.1.v1	1-1323[+]	KEGG:sce:YPR031W`KO:K11380	GO:0005737^cellular_component^cytoplasm`GO:0033100^cellular_component^NuA3 histone acetyltransferase complex`GO:1990467^cellular_component^NuA3a histone acetyltransferase complex`GO:1990468^cellular_component^NuA3b histone acetyltransferase complex`GO:0005634^cellular_component^nucleus`GO:0046872^molecular_function^metal ion binding`GO:0035064^molecular_function^methylated histone binding`GO:0016…	PF13832.7^zf-HC5HC2H_2^PHD-zinc-finger like domain^254-339^E:7.2e-16	.	NTO1_YEAST^NTO1_YEAST^Q:682-1017,H:277-407^33.588%ID^E:4.33e-14^RecName: Full=NuA3 HAT complex component NTO1;^Eukaryota; Fungi; Dikarya; Ascomycota; Saccharomycotina; Saccharomycetes; Saccharomycetales; Saccharomycetaceae; Saccharomyces	NTO1_YEAST^NTO1_YEAST^Q:682-1017,H:277-407^33.588%ID^E:4.33e-14^RecName: Full=NuA3 HAT complex component NTO1;^Eukaryota; Fungi; Dikarya; Ascomycota; Saccharomycotina; Saccharomycetes; Saccharomycetales; Saccharomycetaceae; Saccharomyces	137	75	71	89	142	126	374	493	1265	945	717	681
Pl01G0000401000.v1	Pl01	46024318	46028235	Pl01G0000401000.1.v1	242-1767[+]	KEGG:ath:AT2G40370`KO:K05909	GO:0048046^cellular_component^apoplast`GO:0005886^cellular_component^plasma membrane`GO:0005507^molecular_function^copper ion binding`GO:0004322^molecular_function^ferroxidase activity`GO:0052716^molecular_function^hydroquinone:oxygen oxidoreductase activity`GO:0055072^biological_process^iron ion homeostasis`GO:0006826^biological_process^iron ion transport`GO:0046274^biological_process^lignin cat…	PF07732.16^Cu-oxidase_3^Multicopper oxidase^43-157^E:5.1e-44`PF00394.23^Cu-oxidase^Multicopper oxidase^169-318^E:1.1e-39`PF07731.15^Cu-oxidase_2^Multicopper oxidase^438-570^E:7.6e-40	GO:0005507^molecular_function^copper ion binding`GO:0055114^biological_process^oxidation-reduction process`GO:0016491^molecular_function^oxidoreductase activity	LAC5_ARATH^LAC5_ARATH^Q:287-2005,H:11-580^77.352%ID^E:0^RecName: Full=Laccase-5;^Eukaryota; Viridiplantae; Streptophyta; Embryophyta; Tracheophyta; Spermatophyta; Magnoliopsida; eudicotyledons; Gunneridae; Pentapetalae; rosids; malvids; Brassicales; Brassicaceae; Camelineae; Arabidopsis	LAC5_ARATH^LAC5_ARATH^Q:287-2005,H:11-580^77.352%ID^E:0^RecName: Full=Laccase-5;^Eukaryota; Viridiplantae; Streptophyta; Embryophyta; Tracheophyta; Spermatophyta; Magnoliopsida; eudicotyledons; Gunneridae; Pentapetalae; rosids; malvids; Brassicales; Brassicaceae; Camelineae; Arabidopsis	2685	2254	2288	5339	8136	7470	407	680	1382	6848	5554	5150
Pl01G0000401200.v1	Pl01	46042531	46044725	Pl01G0000401200.1.v1;Pl01G0000401200.2.v1	88-1629[+];339-1092[+]	.;.	.;.	.;.	.;.	.;.	.;.	0	0	0	1272	1864	1766	284	505	958	2102	1547	1476
Pl01G0000402000.v1	Pl01	46090207	46091532	Pl01G0000402000.1.v1	643-321[+]	.	.	PF07107.12^WI12^Wound-induced protein WI12^1-106^E:3.3e-42	.	WUN1_SOLTU^WUN1_SOLTU^Q:643-945,H:1-100^57.282%ID^E:7.01e-30^RecName: Full=Wound-induced protein 1;^Eukaryota; Viridiplantae; Streptophyta; Embryophyta; Tracheophyta; Spermatophyta; Magnoliopsida; eudicotyledons; Gunneridae; Pentapetalae; asterids; lamiids; Solanales; Solanaceae; Solanoideae; Solaneae; Solanum	WUN1_SOLTU^WUN1_SOLTU^Q:643-945,H:1-100^57.282%ID^E:7.01e-30^RecName: Full=Wound-induced protein 1;^Eukaryota; Viridiplantae; Streptophyta; Embryophyta; Tracheophyta; Spermatophyta; Magnoliopsida; eudicotyledons; Gunneridae; Pentapetalae; asterids; lamiids; Solanales; Solanaceae; Solanoideae; Solaneae; Solanum	760	553	777	1831	3046	2591	4298	5861	12993	4711	3890	3359
Pl01G0000402500.v1	Pl01	46117561	46119606	Pl01G0000402500.1.v1	439-465[+]	.	.	PF07554.14^FIVAR^FIVAR domain^30-73^E:0.042	.	.	.	237	150	187	48	41	27	191	216	398	63	42	19
Pl01G0000402600.v1	Pl01	46123060	46124501	Pl01G0000402600.1.v1;Pl01G0000402600.2.v1;Pl01G0000402600.3.v1	37-585[+];166-813[+];423-486[+]	KEGG:ath:AT3G56230`KO:K10523;KEGG:ath:AT3G56230`KO:K10523;KEGG:ath:AT3G56230`KO:K10523	GO:0016567^biological_process^protein ubiquitination;GO:0016567^biological_process^protein ubiquitination;GO:0016567^biological_process^protein ubiquitination	PF00651.32^BTB^BTB/POZ domain^24-128^E:4.5e-21;PF00651.32^BTB^BTB/POZ domain^100-204^E:1e-20;PF00651.32^BTB^BTB/POZ domain^39-95^E:1.1e-08	GO:0005515^molecular_function^protein binding;GO:0005515^molecular_function^protein binding;GO:0005515^molecular_function^protein binding	Y3623_ARATH^Y3623_ARATH^Q:4-603,H:74-272^51%ID^E:1.31e-65^RecName: Full=BTB/POZ domain-containing protein At3g56230;^Eukaryota; Viridiplantae; Streptophyta; Embryophyta; Tracheophyta; Spermatophyta; Magnoliopsida; eudicotyledons; Gunneridae; Pentapetalae; rosids; malvids; Brassicales; Brassicaceae; Camelineae; Arabidopsis;Y3623_ARATH^Y3623_ARATH^Q:166-960,H:1-272^47.985%ID^E:5.47e-84^RecName: Ful…	Y3623_ARATH^Y3623_ARATH^Q:4-603,H:74-272^51%ID^E:1.31e-65^RecName: Full=BTB/POZ domain-containing protein At3g56230;^Eukaryota; Viridiplantae; Streptophyta; Embryophyta; Tracheophyta; Spermatophyta; Magnoliopsida; eudicotyledons; Gunneridae; Pentapetalae; rosids; malvids; Brassicales; Brassicaceae; Camelineae; Arabidopsis;Y3623_ARATH^Y3623_ARATH^Q:166-960,H:1-272^47.985%ID^E:5.47e-84^RecName: Ful…	7	8	8	142	130	122	10	49	59	894	630	765
Pl01G0000402700.v1	Pl01	46128427	46129075	Pl01G0000402700.1.v1	90-309[+]	.	.	.	.	.	.	0	0	0	41	46	40	11	6	14	183	100	104
Pl01G0000403400.v1	Pl01	46172439	46175479	Pl01G0000403400.1.v1;Pl01G0000403400.2.v1;Pl01G0000403400.3.v1	278-1698[+];315-1695[+];200-1314[+]	KEGG:ath:AT2G40480;KEGG:ath:AT2G40480;KEGG:ath:AT2G40480	GO:0005829^cellular_component^cytosol`GO:0009904^biological_process^chloroplast accumulation movement`GO:0009903^biological_process^chloroplast avoidance movement;GO:0005829^cellular_component^cytosol`GO:0009904^biological_process^chloroplast accumulation movement`GO:0009903^biological_process^chloroplast avoidance movement;GO:0005829^cellular_component^cytosol`GO:0009904^biological_process^chlor…	PF05701.12^WEMBL^Weak chloroplast movement under blue light^45-129^E:4.8e-14`PF05701.12^WEMBL^Weak chloroplast movement under blue light^185-436^E:2.8e-21;PF05701.12^WEMBL^Weak chloroplast movement under blue light^45-128^E:3e-13`PF05701.12^WEMBL^Weak chloroplast movement under blue light^184-435^E:2.5e-21;PF05701.12^WEMBL^Weak chloroplast movement under blue light^57-308^E:2.1e-21	.;.;.	Y2048_ARATH^Y2048_ARATH^Q:314-1972,H:16-516^45.502%ID^E:1.98e-95^RecName: Full=WEB family protein At2g40480;^Eukaryota; Viridiplantae; Streptophyta; Embryophyta; Tracheophyta; Spermatophyta; Magnoliopsida; eudicotyledons; Gunneridae; Pentapetalae; rosids; malvids; Brassicales; Brassicaceae; Camelineae; Arabidopsis;Y2048_ARATH^Y2048_ARATH^Q:351-2006,H:16-516^45.69%ID^E:4.06e-96^RecName: Full=WEB f…	Y2048_ARATH^Y2048_ARATH^Q:314-1972,H:16-516^45.502%ID^E:1.98e-95^RecName: Full=WEB family protein At2g40480;^Eukaryota; Viridiplantae; Streptophyta; Embryophyta; Tracheophyta; Spermatophyta; Magnoliopsida; eudicotyledons; Gunneridae; Pentapetalae; rosids; malvids; Brassicales; Brassicaceae; Camelineae; Arabidopsis;Y2048_ARATH^Y2048_ARATH^Q:351-2006,H:16-516^45.69%ID^E:4.06e-96^RecName: Full=WEB f…	15495	11675	11854	6971	10418	9069	5325	8776	18020	2110	1378	1031
Pl01G0000403500.v1	Pl01	46182686	46183923	Pl01G0000403500.2.v1;Pl01G0000403500.1.v1	253-615[+];253-579[+]	.;.	.;.	.;.	.;.	.;.	.;.	86	74	74	27	17	26	90	80	184	9	0	0
Pl01G0000403700.v1	Pl01	46200955	46205114	Pl01G0000403700.1.v1	1-1389[+]	KEGG:ath:AT5G10030`KO:K14431	GO:0005634^cellular_component^nucleus`GO:0003700^molecular_function^DNA-binding transcription factor activity`GO:0043565^molecular_function^sequence-specific DNA binding`GO:0009409^biological_process^response to cold`GO:0006351^biological_process^transcription, DNA-templated	PF07716.16^bZIP_2^Basic region leucine zipper^145-188^E:2.5e-06`PF00170.22^bZIP_1^bZIP transcription factor^149-181^E:1.3e-06`PF14144.7^DOG1^Seed dormancy control^264-338^E:2e-31	GO:0003700^molecular_function^DNA-binding transcription factor activity`GO:0006355^biological_process^regulation of transcription, DNA-templated`GO:0043565^molecular_function^sequence-specific DNA binding`GO:0006351^biological_process^transcription, DNA-templated	TGA4_ARATH^TGA4_ARATH^Q:436-1386,H:79-364^68.454%ID^E:1.81e-140^RecName: Full=Transcription factor TGA4;^Eukaryota; Viridiplantae; Streptophyta; Embryophyta; Tracheophyta; Spermatophyta; Magnoliopsida; eudicotyledons; Gunneridae; Pentapetalae; rosids; malvids; Brassicales; Brassicaceae; Camelineae; Arabidopsis`TGA4_ARATH^TGA4_ARATH^Q:1-240,H:1-82^46.341%ID^E:2.85e-15^RecName: Full=Transcription f…	TGA4_ARATH^TGA4_ARATH^Q:436-1386,H:79-364^68.454%ID^E:1.81e-140^RecName: Full=Transcription factor TGA4;^Eukaryota; Viridiplantae; Streptophyta; Embryophyta; Tracheophyta; Spermatophyta; Magnoliopsida; eudicotyledons; Gunneridae; Pentapetalae; rosids; malvids; Brassicales; Brassicaceae; Camelineae; Arabidopsis`TGA4_ARATH^TGA4_ARATH^Q:1-240,H:1-82^46.341%ID^E:2.85e-15^RecName: Full=Transcription f…	58	39	33	744	1257	1118	541	942	2223	2124	1503	1394
Pl01G0000404200.v1	Pl01	46240154	46241451	Pl01G0000404200.1.v1	54-990[+]	.	.	.	.	.	.	65	86	97	31	54	26	88	72	171	0	0	0
Pl01G0000405400.v1	Pl01	46335455	46340058	Pl01G0000405400.1.v1	163-1533[+]	.	GO:0005737^cellular_component^cytoplasm`GO:0004512^molecular_function^inositol-3-phosphate synthase activity`GO:0006021^biological_process^inositol biosynthetic process`GO:0008654^biological_process^phospholipid biosynthetic process	PF07994.13^NAD_binding_5^Myo-inositol-1-phosphate synthase^62-494^E:8.8e-140`PF01658.18^Inos-1-P_synth^Myo-inositol-1-phosphate synthase^310-423^E:2.7e-43	GO:0004512^molecular_function^inositol-3-phosphate synthase activity`GO:0006021^biological_process^inositol biosynthetic process`GO:0008654^biological_process^phospholipid biosynthetic process	INO1_NICPA^INO1_NICPA^Q:163-1692,H:1-510^91.961%ID^E:0^RecName: Full=Inositol-3-phosphate synthase;^Eukaryota; Viridiplantae; Streptophyta; Embryophyta; Tracheophyta; Spermatophyta; Magnoliopsida; eudicotyledons; Gunneridae; Pentapetalae; asterids; lamiids; Solanales; Solanaceae; Nicotianoideae; Nicotianeae; Nicotiana	INO1_NICPA^INO1_NICPA^Q:163-1692,H:1-510^91.961%ID^E:0^RecName: Full=Inositol-3-phosphate synthase;^Eukaryota; Viridiplantae; Streptophyta; Embryophyta; Tracheophyta; Spermatophyta; Magnoliopsida; eudicotyledons; Gunneridae; Pentapetalae; asterids; lamiids; Solanales; Solanaceae; Nicotianoideae; Nicotianeae; Nicotiana	99673	83420	83976	20491	30942	26907	60069	91338	197842	13032	9467	8200
Pl01G0000405600.v1	Pl01	46362435	46364241	Pl01G0000405600.1.v1	311-876[+]	KEGG:ath:AT4G39780	GO:0005634^cellular_component^nucleus`GO:0003700^molecular_function^DNA-binding transcription factor activity`GO:0043565^molecular_function^sequence-specific DNA binding`GO:0009873^biological_process^ethylene-activated signaling pathway	PF00847.21^AP2^AP2 domain^117-166^E:1.3e-14	GO:0003700^molecular_function^DNA-binding transcription factor activity`GO:0006355^biological_process^regulation of transcription, DNA-templated	ERF60_ARATH^ERF60_ARATH^Q:320-1180,H:3-268^47.315%ID^E:6.55e-57^RecName: Full=Ethylene-responsive transcription factor ERF060;^Eukaryota; Viridiplantae; Streptophyta; Embryophyta; Tracheophyta; Spermatophyta; Magnoliopsida; eudicotyledons; Gunneridae; Pentapetalae; rosids; malvids; Brassicales; Brassicaceae; Camelineae; Arabidopsis	ERF60_ARATH^ERF60_ARATH^Q:320-1180,H:3-268^47.315%ID^E:6.55e-57^RecName: Full=Ethylene-responsive transcription factor ERF060;^Eukaryota; Viridiplantae; Streptophyta; Embryophyta; Tracheophyta; Spermatophyta; Magnoliopsida; eudicotyledons; Gunneridae; Pentapetalae; rosids; malvids; Brassicales; Brassicaceae; Camelineae; Arabidopsis	209	174	186	1010	1565	1271	396	634	1371	1655	1132	1092
Pl01G0000405700.v1	Pl01	46373874	46376803	Pl01G0000405700.1.v1	219-1104[+]	KEGG:ath:AT5G65140`KO:K01087	GO:0005730^cellular_component^nucleolus`GO:0005634^cellular_component^nucleus`GO:0004805^molecular_function^trehalose-phosphatase activity`GO:0046686^biological_process^response to cadmium ion`GO:0005992^biological_process^trehalose biosynthetic process	PF02358.17^Trehalose_PPase^Trehalose-phosphatase^109-343^E:1.2e-78	GO:0003824^molecular_function^catalytic activity`GO:0005992^biological_process^trehalose biosynthetic process	TPPJ_ARATH^TPPJ_ARATH^Q:219-1301,H:1-370^71.925%ID^E:0^RecName: Full=Probable trehalose-phosphate phosphatase J;^Eukaryota; Viridiplantae; Streptophyta; Embryophyta; Tracheophyta; Spermatophyta; Magnoliopsida; eudicotyledons; Gunneridae; Pentapetalae; rosids; malvids; Brassicales; Brassicaceae; Camelineae; Arabidopsis	TPPJ_ARATH^TPPJ_ARATH^Q:219-1301,H:1-370^71.925%ID^E:0^RecName: Full=Probable trehalose-phosphate phosphatase J;^Eukaryota; Viridiplantae; Streptophyta; Embryophyta; Tracheophyta; Spermatophyta; Magnoliopsida; eudicotyledons; Gunneridae; Pentapetalae; rosids; malvids; Brassicales; Brassicaceae; Camelineae; Arabidopsis	22	13	20	42	98	86	9	18	26	70	61	76
Pl01G0000408700.v1	Pl01	46626934	46627464	Pl01G0000408700.1.v1	1-531[+]	.	.	.	.	.	.	2	13	13	170	281	215	245	280	593	433	263	235
Pl01G0000409100.v1	Pl01	46648575	46649207	Pl01G0000409100.1.v1	1-633[+]	KEGG:ath:AT5G27420`KO:K10664	GO:0016021^cellular_component^integral component of membrane`GO:0016020^cellular_component^membrane`GO:0046872^molecular_function^metal ion binding`GO:0004842^molecular_function^ubiquitin-protein transferase activity`GO:0071456^biological_process^cellular response to hypoxia`GO:0043562^biological_process^cellular response to nitrogen levels`GO:0009816^biological_process^defense response to bacter…	PF13639.7^zf-RING_2^Ring finger domain^109-152^E:8.4e-14`PF17123.6^zf-RING_11^RING-like zinc finger^109-138^E:1.8e-10`PF12678.8^zf-rbx1^RING-H2 zinc finger domain^109-152^E:1.8e-09`PF13923.7^zf-C3HC4_2^Zinc finger, C3HC4 type (RING finger)^109-151^E:6.3e-10`PF14634.7^zf-RING_5^zinc-RING finger domain^109-153^E:2.1e-07`PF13445.7^zf-RING_UBOX^RING-type zinc-finger^110-149^E:4e-08`PF00097.26^zf-C3HC…	GO:0008270^molecular_function^zinc ion binding`GO:0046872^molecular_function^metal ion binding`GO:0004842^molecular_function^ubiquitin-protein transferase activity`GO:0005680^cellular_component^anaphase-promoting complex	ATL31_ARATH^ATL31_ARATH^Q:250-492,H:98-180^48.193%ID^E:2.91e-21^RecName: Full=E3 ubiquitin-protein ligase ATL31;^Eukaryota; Viridiplantae; Streptophyta; Embryophyta; Tracheophyta; Spermatophyta; Magnoliopsida; eudicotyledons; Gunneridae; Pentapetalae; rosids; malvids; Brassicales; Brassicaceae; Camelineae; Arabidopsis	ATL31_ARATH^ATL31_ARATH^Q:250-492,H:98-180^48.193%ID^E:2.91e-21^RecName: Full=E3 ubiquitin-protein ligase ATL31;^Eukaryota; Viridiplantae; Streptophyta; Embryophyta; Tracheophyta; Spermatophyta; Magnoliopsida; eudicotyledons; Gunneridae; Pentapetalae; rosids; malvids; Brassicales; Brassicaceae; Camelineae; Arabidopsis	0	0	0	12	16	14	8	15	29	106	61	44
Pl01G0000409200.v1	Pl01	46652797	46655066	Pl01G0000409200.1.v1	238-1020[+]	KEGG:ath:AT4G40080	GO:0005905^cellular_component^clathrin-coated pit`GO:0030136^cellular_component^clathrin-coated vesicle`GO:0005794^cellular_component^Golgi apparatus`GO:0005886^cellular_component^plasma membrane`GO:0005545^molecular_function^1-phosphatidylinositol binding`GO:0032050^molecular_function^clathrin heavy chain binding`GO:0005546^molecular_function^phosphatidylinositol-4,5-bisphosphate binding`GO:0000…	PF07651.17^ANTH^ANTH domain^30-154^E:1.7e-13`PF01417.21^ENTH^ENTH domain^31-98^E:0.00011	GO:0005543^molecular_function^phospholipid binding	CAP16_ARATH^CAP16_ARATH^Q:238-1056,H:4-272^46.643%ID^E:2.6e-74^RecName: Full=Putative clathrin assembly protein At4g40080;^Eukaryota; Viridiplantae; Streptophyta; Embryophyta; Tracheophyta; Spermatophyta; Magnoliopsida; eudicotyledons; Gunneridae; Pentapetalae; rosids; malvids; Brassicales; Brassicaceae; Camelineae; Arabidopsis	CAP16_ARATH^CAP16_ARATH^Q:238-1056,H:4-272^46.643%ID^E:2.6e-74^RecName: Full=Putative clathrin assembly protein At4g40080;^Eukaryota; Viridiplantae; Streptophyta; Embryophyta; Tracheophyta; Spermatophyta; Magnoliopsida; eudicotyledons; Gunneridae; Pentapetalae; rosids; malvids; Brassicales; Brassicaceae; Camelineae; Arabidopsis	6	19	25	90	106	68	245	336	643	359	325	335
Pl01G0000409400.v1	Pl01	46660878	46661357	Pl01G0000409400.1.v1	1-480[+]	.	.	.	.	.	.	5	11	9	61	72	60	35	28	86	56	53	67
Pl01G0000409500.v1	Pl01	46662621	46664138	Pl01G0000409500.1.v1	86-549[+]	.	.	.	.	.	.	27	23	28	113	165	193	125	256	389	229	154	236
Pl01G0000409600.v1	Pl01	46664378	46664719	Pl01G0000409600.1.v1	1-342[+]	.	.	.	.	.	.	45	52	80	505	641	587	323	667	1709	1139	1041	944
Pl01G0000409700.v1	Pl01	46667641	46668858	Pl01G0000409700.1.v1	337-399[+]	KEGG:ath:AT2G04240`KO:K16285	GO:0016021^cellular_component^integral component of membrane`GO:0046872^molecular_function^metal ion binding`GO:0016740^molecular_function^transferase activity`GO:0009688^biological_process^abscisic acid biosynthetic process`GO:0009687^biological_process^abscisic acid metabolic process`GO:0016567^biological_process^protein ubiquitination`GO:0010200^biological_process^response to chitin`GO:0009739…	PF13639.7^zf-RING_2^Ring finger domain^86-129^E:1.9e-11`PF17123.6^zf-RING_11^RING-like zinc finger^86-114^E:4.6e-08`PF00097.26^zf-C3HC4^Zinc finger, C3HC4 type (RING finger)^87-128^E:3.7e-06	GO:0046872^molecular_function^metal ion binding	XERIC_ARATH^XERIC_ARATH^Q:337-726,H:1-146^34.667%ID^E:1.25e-16^RecName: Full=Probable E3 ubiquitin-protein ligase XERICO;^Eukaryota; Viridiplantae; Streptophyta; Embryophyta; Tracheophyta; Spermatophyta; Magnoliopsida; eudicotyledons; Gunneridae; Pentapetalae; rosids; malvids; Brassicales; Brassicaceae; Camelineae; Arabidopsis	XERIC_ARATH^XERIC_ARATH^Q:337-726,H:1-146^34.667%ID^E:1.25e-16^RecName: Full=Probable E3 ubiquitin-protein ligase XERICO;^Eukaryota; Viridiplantae; Streptophyta; Embryophyta; Tracheophyta; Spermatophyta; Magnoliopsida; eudicotyledons; Gunneridae; Pentapetalae; rosids; malvids; Brassicales; Brassicaceae; Camelineae; Arabidopsis	48	60	44	300	373	316	145	167	265	5084	3036	3807
Pl01G0000410800.v1	Pl01	46740834	46744064	Pl01G0000410800.1.v1	283-1782[+]	KEGG:zma:541683	GO:0016607^cellular_component^nuclear speck`GO:0005634^cellular_component^nucleus`GO:0003729^molecular_function^mRNA binding`GO:0003723^molecular_function^RNA binding`GO:0045292^biological_process^mRNA cis splicing, via spliceosome`GO:0007275^biological_process^multicellular organism development`GO:0000381^biological_process^regulation of alternative mRNA splicing, via spliceosome	PF13893.7^RRM_5^RNA recognition motif. (a.k.a. RRM, RBD, or RNP domain)^159-237^E:9.8e-07`PF00076.23^RRM_1^RNA recognition motif. (a.k.a. RRM, RBD, or RNP domain)^166-230^E:1.2e-11`PF04059.13^RRM_2^RNA recognition motif 2^395-505^E:5.6e-34	GO:0003676^molecular_function^nucleic acid binding	TE1_MAIZE^TE1_MAIZE^Q:1381-1896,H:405-584^72.928%ID^E:2.62e-80^RecName: Full=Protein terminal ear1;^Eukaryota; Viridiplantae; Streptophyta; Embryophyta; Tracheophyta; Spermatophyta; Magnoliopsida; Liliopsida; Poales; Poaceae; PACMAD clade; Panicoideae; Andropogonodae; Andropogoneae; Tripsacinae; Zea`TE1_MAIZE^TE1_MAIZE^Q:547-1047,H:110-306^29.851%ID^E:6.45e-21^RecName: Full=Protein terminal ear1;…	TE1_MAIZE^TE1_MAIZE^Q:1381-1896,H:405-584^72.928%ID^E:2.62e-80^RecName: Full=Protein terminal ear1;^Eukaryota; Viridiplantae; Streptophyta; Embryophyta; Tracheophyta; Spermatophyta; Magnoliopsida; Liliopsida; Poales; Poaceae; PACMAD clade; Panicoideae; Andropogonodae; Andropogoneae; Tripsacinae; Zea`TE1_MAIZE^TE1_MAIZE^Q:547-1047,H:110-306^29.851%ID^E:6.45e-21^RecName: Full=Protein terminal ear1;…	355	363	299	61	67	92	192	368	754	303	142	142
[truncated: 3,898 more rows]
