# Supplementary material for: Comprehensive genomic resources related to domestication and crop improvement traits in Lima bean
Source: Research Square preprint supplement (doi:10.21203/rs.3.rs-95762/v1), 2020-10-28
Supplement: Supplementary file 14 [file 32d391c1704ea939dda3bf13.xlsx]

## Sheet: Sheet1
	DomMI	DomMII	DomAI	WildMII	WildMI	WildAI	WildAII	DomAII
DomMII	0.76	0
DomAI	0.86	0.81	0
WildMII	0.7	0.03	0.73	0
WildMI	0.33	0.54	0.72	0.54	0
WildAI	0.85	0.72	0.21	0.69	0.67	0
WildAII	0.83	0.61	0.88	0.56	0.65	0.86	0
DomAII	0.82	0.45	0.87	0.49	0.61	0.84	0.15	0
