# Supplementary material for: Comprehensive genomic resources related to domestication and crop improvement traits in Lima bean
Source: Research Square preprint supplement (doi:10.21203/rs.3.rs-95762/v1), 2020-10-28
Supplement: Supplementary file 16 [file 7eb98e66880a6b820a9982f0.xlsx]

## Sheet: Introgressions4Pops
Chr	Start	End	Length	Sample	Sample population	Origin population of introgressed haplotype	Total variants	Genotyped variants	Score AI	Score AII	Score MI	Score MII	Score self group	Z-value D statistic
Pl01	122025	1676606	1554582	G25224A-ELS	MI	MII	50	50	-20	19	-8	44	-8	3.79
Pl01	122025	1676606	1554582	JMC_1393-COR	MII	MI	50	49	-1	-8	35	5	5	6.26
Pl01	122025	1676606	1554582	G27454-ELS	MI	MII	50	48	-10	15	0	32	0	9.78
Pl01	122025	43127721	43005697	G27435-ELS	MI	MII	500	496	-96	152	99	403	99	20.53
Pl01	122025	46546378	46424354	G26697-ELS	AII	MII	600	591	-114	155	141	519	155	11.66
Pl01	122025	46546378	46424354	G27445-COR	MI	MII	600	576	-101	186	96	458	96	2.28
Pl01	3745643	41420380	37674738	G26184-ELS	AI	MI	350	348	-53	-10	321	87	-53	4.47
Pl01	11383102	39608130	28225029	G26618-COR	AII	AI	200	186	170	-25	-39	-37	-25	8.13
Pl01	33202258	41420380	8218123	JMC_1393-COR	MII	MI	150	148	-47	-4	142	50	50	6.26
Pl01	37836600	45199592	7362993	JMC_1097-COR	MII	MI	200	180	-58	-30	178	43	43	0.81
Pl01	39720443	46546378	6825936	G27448-COR	MI	MII	200	195	-31	69	41	156	41	8.83
Pl01	41477950	45199592	3721643	G25596A-COR	MII	MI	100	96	-15	-17	90	20	20	2.5
Pl01	43127778	46546378	3418601	JMC_1393-COR	MII	MI	100	93	-2	-18	69	32	32	6.26
Pl01	45218122	46546378	1328257	G27441-COR	MII	MI	50	50	-9	-24	49	5	5	2.58
Pl02	40012	2801492	2761481	JMC_1393-COR	MII	MI	100	100	-8	-18	97	14	14	6.26
Pl02	40012	10206222	10166211	G26618-COR	AII	AI	300	283	272	-63	-54	-78	-63	8.13
Pl02	1331295	51127710	49796416	G27420-ELS	MII	MI	750	750	-175	-68	726	125	125	6.16
Pl02	2801640	38336110	35534471	G26619-ELS	AII	AI	400	395	361	-55	-83	-55	-55	22.36
Pl02	2801640	40643002	37841363	G27448-COR	MI	MII	450	435	-72	104	92	388	92	8.83
Pl02	19369271	38336110	18966840	JMC_1097-COR	MII	MI	100	93	-12	-17	85	24	24	0.81
Pl02	40652520	43458248	2805729	G26184-ELS	AI	MI	50	50	4	-3	34	-5	4	4.47
Pl02	40652520	43458248	2805729	JMC_1097-COR	MII	MI	50	46	-12	3	46	-3	-3	0.81
Pl02	43505706	45204397	1698692	G25657B-ELS	MI	AI	50	50	50	-8	-10	-9	-10	5.6
Pl02	47205819	49041819	1836001	G25224A-ELS	MI	MII	50	49	1	19	-1	47	-1	3.79
Pl02	49086070	51127710	2041641	G26619-ELS	AII	AI	50	46	37	-18	1	-11	-18	22.36
Pl03	47841	1469505	1421665	G25224A-ELS	MI	MII	50	50	-17	19	-1	43	-1	3.79
Pl03	47841	1469505	1421665	G25596A-COR	MII	MI	50	48	-13	5	37	5	5	2.5
Pl03	47841	1469505	1421665	JMC_1393-COR	MII	MI	50	47	-7	-5	45	-3	-3	6.26
Pl03	47841	28562677	28514837	G26619-ELS	AII	AI	450	447	432	-87	-88	-89	-87	22.36
Pl03	47841	43938312	43890472	G26618-COR	AII	AI	800	729	708	-132	-145	-139	-132	8.13
Pl03	1507231	22564926	21057696	JMC_1097-COR	MII	MI	250	230	-34	18	220	71	71	0.81
Pl03	1507231	38547031	37039801	G27448-COR	MI	MII	650	634	-105	149	138	559	138	8.83
Pl03	19514170	25811924	6297755	G26697-ELS	AII	MII	100	94	-19	39	14	66	39	11.66
Pl03	22676982	28562677	5885696	G27441-COR	MII	MI	150	145	-51	-10	145	30	30	2.58
Pl03	28562728	30240246	1677519	G27435-ELS	MI	MII	50	50	-8	12	14	40	14	20.53
Pl03	31813965	33700228	1886264	G27441-COR	MII	MI	50	48	-12	-6	47	-2	-2	2.58
Pl03	36332978	43938312	7605335	JMC_1393-COR	MII	MI	150	147	-29	-8	132	35	35	6.26
Pl03	38599279	41606272	3006994	G27420-ELS	MII	MI	50	50	-13	8	43	14	14	6.16
Pl04	101484	2752862	2651379	G26619-ELS	AII	AI	50	49	49	-18	-10	-5	-18	22.36
Pl04	101484	48486372	48384889	G27435-ELS	MI	MII	350	343	-50	90	113	264	113	20.53
Pl04	9496390	48486372	38989983	JMC_1393-COR	MII	MI	200	200	-26	-6	197	76	76	6.26
Pl05	44837	1786575	1741739	G26618-COR	AII	AI	50	46	46	-14	-13	-24	-14	8.13
Pl05	44837	36464843	36420007	G27435-ELS	MI	MII	400	399	-80	136	89	351	89	20.53
Pl05	44837	36464843	36420007	G27448-COR	MI	MII	400	391	-88	127	93	349	93	8.83
Pl05	1786629	4682287	2895659	G25657-ELS	MI	AI	50	50	39	-19	3	-14	3	6.02
Pl05	1786629	36464843	34678215	JMC_1393-COR	MII	MI	350	345	-68	-36	332	83	83	6.26
Pl05	4690357	36464843	31774487	G26619-ELS	AII	AI	300	299	293	-95	-65	-39	-95	22.36
Pl06	224725	26835785	26611061	JMC_1393-COR	MII	MI	200	197	-45	-18	191	8	8	6.26
Pl06	224725	28725761	28501037	G26619-ELS	AII	AI	250	245	239	-51	-66	-50	-51	22.36
Pl06	224725	34260137	34035413	G27435-ELS	MI	MII	350	345	-70	92	23	315	23	20.53
Pl06	224725	36042808	35818084	G26618-COR	AII	AI	450	416	405	-93	-74	-66	-93	8.13
Pl06	224725	36042808	35818084	G27448-COR	MI	MII	450	445	-92	144	49	379	49	8.83
Pl06	21370789	30627290	9256502	G27441-COR	MII	MI	200	195	-32	-21	179	30	30	2.58
Pl06	24206638	26835785	2629148	G26697-ELS	AII	MII	50	47	-5	13	7	30	13	11.66
Pl06	26840781	34260137	7419357	G25596A-COR	MII	MI	200	188	-20	-5	183	42	42	2.5
Pl06	26840781	36042808	9202028	G27445-COR	MI	MII	250	245	-51	56	58	195	58	2.28
Pl06	26840781	36042808	9202028	G27454-ELS	MI	MII	250	249	-54	55	69	184	69	9.78
Pl07	87246	1167956	1080711	G25215-ELS	MI	AI	50	50	42	-17	10	-1	10	3.95
Pl07	1167980	3111950	1943971	G25408-ELS	MI	AI	50	50	40	-20	15	-15	15	7.35
Pl07	1167980	3111950	1943971	G27448-COR	MI	MII	50	50	-18	18	13	39	13	8.83
Pl07	1167980	9239325	8071346	G27435-ELS	MI	MII	200	194	-64	65	64	144	64	20.53
Pl07	4844273	12444713	7600441	G27454-ELS	MI	MII	150	149	-43	18	45	125	45	9.78
Pl07	9253552	15927991	6674440	G27448-COR	MI	MII	100	99	-13	4	27	85	27	8.83
Pl07	36084655	38740005	2655351	G26312-ELS	MI	MII	50	50	-12	6	10	37	10	-0.94
Pl07	36084655	38740005	2655351	G26487-ELS	MI	MII	50	49	-11	7	11	36	11	-1.78
Pl07	36084655	38740005	2655351	G26498-ELS	MI	MII	50	50	-12	6	10	37	10	-1.15
Pl07	36084655	38740005	2655351	G26509-ELS	MI	MII	50	49	-13	7	9	36	9	-2.27
Pl07	36084655	38740005	2655351	G26626-ELS	MI	MII	50	50	-12	6	10	37	10	-0.43
Pl07	36084655	38740005	2655351	G26702-ELS	MI	MII	50	50	-12	6	10	37	10	-0.21
Pl07	38746105	45137658	6391554	G27454-ELS	MI	MII	200	200	-24	55	41	171	41	9.78
Pl08	83973	8778829	8694857	G27454-ELS	MI	MII	200	200	-41	80	16	166	16	9.78
Pl08	2245539	4699179	2453641	G26354-ELS	MI	AI	50	46	38	-8	-10	1	-10	2.35
Pl08	2245539	55238790	52993252	G27435-ELS	MI	MII	450	442	-62	131	68	382	68	20.53
Pl08	4699227	6976506	2277280	G25364-ELS	MI	MII	50	49	-14	10	6	44	6	-0.31
Pl08	4699227	6976506	2277280	G25811-ELS	MI	MII	50	50	-15	9	5	45	5	-0.91
Pl08	4699227	6976506	2277280	G26315-ELS	MI	MII	50	49	-14	8	4	44	4	-1.15
Pl08	4699227	6976506	2277280	G26438-ELS	MI	MII	50	50	-15	9	5	45	5	-1.24
Pl08	4699227	6976506	2277280	G26490-COR	MI	MII	50	48	-13	9	5	45	5	-8.88
Pl08	4699227	6976506	2277280	G26621-ELS	MI	MII	50	50	-15	9	5	45	5	-1.49
Pl08	4699227	6976506	2277280	G27422-COR	MI	MII	50	48	-15	11	3	43	3	-7.53
Pl08	4699227	50566528	45867302	G26697-ELS	AII	MII	400	398	-76	122	45	363	122	11.66
Pl08	18569839	41169784	22599946	G26615-ELS-2	AII	AI	50	50	48	-8	-18	-16	-8	3.41
Pl08	47739787	53034300	5294514	JMC_1393-COR	MII	MI	100	100	-19	2	96	17	17	6.26
Pl08	53065347	56692790	3627444	G27441-COR	MII	MI	100	97	-29	-3	76	23	23	2.58
Pl09	4130135	7357594	3227460	JMC_1097-COR	MII	MI	100	89	-9	-15	84	23	23	0.81
Pl09	4130135	12224980	8094846	JMC_1393-COR	MII	MI	200	195	-20	-17	181	76	76	6.26
Pl09	4130135	40272712	36142578	G27435-ELS	MI	MII	600	593	-74	156	187	517	187	20.53
Pl09	18591008	38648474	20057467	G26618-COR	AII	AI	250	231	224	-76	-39	-49	-76	8.13
Pl09	30737531	36371693	5634163	G25172-ELS	AI	MI	100	100	-12	-15	86	15	-12	2.28
Pl09	30737531	38648474	7910944	G25596A-COR	MII	MI	150	144	-40	-8	138	43	43	2.5
Pl09	34558726	40272712	5713987	G27448-COR	MI	MII	150	144	-20	61	35	121	35	8.83
Pl09	38672172	40272712	1600541	G27441-COR	MII	MI	50	48	-11	-12	42	9	9	2.58
Pl10	73991	53098399	53024409	G27441-COR	MII	MI	350	339	-56	-34	314	80	80	2.58
Pl10	2084745	53098399	51013655	G27448-COR	MI	MII	300	292	-38	109	46	245	46	8.83
Pl10	8097113	51836925	43739813	G26619-ELS	AII	AI	200	198	190	-57	-38	-25	-57	22.36
Pl10	49601748	53098399	3496652	G27435-ELS	MI	MII	100	98	-16	42	9	82	9	20.53
Pl10	51840730	53098399	1257670	JMC_778	MII	MI	50	50	-8	-17	38	13	13	7.98
Pl11	39766	1503098	1463333	JMC_1393-COR	MII	MI	50	50	5	-7	39	12	12	6.26
Pl11	39766	6514731	6474966	G27445-COR	MI	MII	150	149	-38	48	20	125	20	2.28
Pl11	1503294	44222958	42719665	G26697-ELS	AII	MII	350	344	-76	106	78	314	106	11.66
Pl11	1503294	44222958	42719665	G27435-ELS	MI	MII	350	346	-91	128	71	316	71	20.53
Pl11	3194272	44222958	41028687	G27420-ELS	MII	MI	300	299	-75	-21	291	47	47	6.16
Pl11	6573005	44222958	37649954	G27448-COR	MI	MII	200	192	-46	76	44	182	44	8.83
