# Supplementary material for: Comprehensive genomic resources related to domestication and crop improvement traits in Lima bean
Source: Research Square preprint supplement (doi:10.21203/rs.3.rs-95762/v1), 2020-10-28
Supplement: Supplementary file 17 [file 7fd3faaf96782a36ccb5382e.xlsx]

## Sheet: Sheet1
Chr	No Markers	Loci	First Marker (bp)	Last Marker (bp)	Physical Coverage (Mbp)	Genetic Length (cM)	Max Dist Between Loci (cM)	Avg Dist Between Loci (cM)	Avg Dist Between Loci (kbp)
Pl01	119	27	591375	47588051	47	113.3	20.5	4.2	1740.62
Pl02	1554	60	720985	51607776	50.89	136.5	24.4	2.27	848.11
Pl03	1102	68	2903	45042368	45.04	116.9	7.8	1.72	662.35
Pl04	887	45	66315	49299606	49.23	91.4	12.2	2.03	1094.07
Pl05	1263	43	24078	38089793	38.07	74.7	7.5	1.74	885.25
Pl06	661	46	2763	36649143	36.65	60.3	3.5	1.31	796.66
Pl07	1604	56	1778	47820557	47.82	98.4	8.2	1.76	853.91
Pl08	749	73	35793	57107478	57.07	109.8	6.7	1.5	781.8
Pl09	310	43	2050	40853806	40.85	133.7	32.8	3.11	950.04
Pl10	453	26	53329	53972946	53.92	62	11.4	2.38	2073.83
Pl11	1795	35	30471	48067523	48.04	66.7	9	1.91	1372.49
Total	10497	522			514.57	1063.8	144
Mean	954.3	47.5	139258	4.69181e+07	46.78	96.7	13.1	2.18	1096.28
