# Supplementary material for: Comprehensive genomic resources related to domestication and crop improvement traits in Lima bean
Source: Research Square preprint supplement (doi:10.21203/rs.3.rs-95762/v1), 2020-10-28
Supplement: Supplementary file 19 [file c5cdbe75d70f26c3dc9908bc.xlsx]

## Sheet: Sheet1
Chr	Chromosome (cM/Mbp)	Euchromatic Arms (cM/Mbp)	Euchromatic Short Arm (cM/Mbp)	Euchromatic Long Arm (cM/Mbp)	Pericentromere (cM/Mbp)	Start of Pericentromere (Mbp)	End of Pericentromere (Mbp)	Pericentromere Length (Mbp)
Pl01	2.41	8.62	7.52	9.81	0.1	7.72	22.11*	14.38*
Pl02	2.68	5.43	5.29	5.51	0.16	9.984	36.417	26.43
Pl03	2.6	3.83	5.23	3.45	0.15	6.03	23.711	17.68
Pl04	1.86	7.08	5.43	9.66	0.09	7.927	44.546	36.62
Pl05	1.96	4.63	4	5.35	0.15	8.325	30.802	22.48
Pl06	1.65	3.42	--	3.42	0.2	0.003	19.761	19.76
Pl07	2.06	4.78	5.5	4.21	0.27	8.422	37.151	28.73
Pl08	1.92	4.29	4.48	4.11	0.23	14.141	45.172	31.03
Pl09	3.27	6.24	6.61	5.98	0.56	8.18	29.51*	21.33*
Pl10	1.15	5.43	4.15	6.93	0.1	5.766	49.1	43.33
Pl11	1.39	6.04	8.38	3.6	0.09	5.414	42.758	37.34
Total								299.12
Mean	2.1	5.4	5.7	5.6	0.2			27.19
*denotes region of limited marker coverage and potentially inaccurate estimate.
