# Supplementary material for: Comprehensive genomic resources related to domestication and crop improvement traits in Lima bean
Source: Research Square preprint supplement (doi:10.21203/rs.3.rs-95762/v1), 2020-10-28
Supplement: Supplementary file 20 [file f9e76e01295af14f290ff23b.xlsx]

## Sheet: Hoja1
Passport data for the 482 wild and domesticated accessions of Lima bean analyzed in this study.
No_Taxa	ID 2019	Genepool_Structure	DAPC_membership_K5	Institution	Biological_Status	Country	Department	Municipality	Elevation	Latitude	Longitude	100_seed_weinght	Flowering_time_days	Fisrt_harvest_days	Last_harvest_days	Phaseolin_type
1	27Berni	Dom_MI	2	CICY	Domesticated	Mexico
2	29inifap	Dom_MI	2	CICY	Domesticated	Mexico
3	98inifap	Dom_MI	2	CICY	Domesticated	Mexico
4	BGB-I	Dom_MI	2	CICY	Domesticated	Mexico	Yucatán	Tixcacal		20.943	-89.7133
5	BGB-IV	Dom_MI	2	CICY	Domesticated	Mexico	Quintana Roo	Tuzik. FCP		19.9153	-89.1597
6	BGB-IX	Dom_MI	2	CICY	Domesticated	Mexico	Quintana Roo	Naranjal		20.8044	-87.4761
7	BGB-V	Dom_MI	2	CICY	Domesticated	Mexico	Quintana Roo	Xyatil		19.6625	-88.4444
8	BGB-VI	Dom_MI	2	CICY	Domesticated	Mexico	Quintana Roo	X-itazil		19.3917	-88.0742
9	BGB-VII	Dom_MI	2	CICY	Domesticated	Mexico	Quintana Roo	Kampocolche		19.8792	-88.3167
10	BGP-4	Dom_MI	2	CICY	Domesticated	Mexico	Yucatán	Kinil		20.3244	-89.1338
11	BGP-5	Dom_MI	2	CICY	Domesticated	Mexico	Quintana Roo	Yaxley		19.7687	-88.2
12	BGP-6	Dom_MI	2	CICY	Domesticated	Mexico	Yucatán	Tzumuc		20.5911	-88.4562
13	BGP-7	Dom_MI	2	CICY	Domesticated	Mexico	Yucatán	Timul		21.1928	-89.3894
14	BGP-8	Dom_MI	2	CICY	Domesticated	Mexico	Yucatán	Sisbic		20.3344	-88.0881
15	BGP-9	Dom_MI	2	CICY	Domesticated	Mexico	Yucatán	Espita		21.0106	-88.3055
16	BGS-1	Dom_MI	2	CICY	Domesticated	Mexico	Yucatán	Becanchén		19.8742	-89.2169
17	BGS-2	Dom_MI	2	CICY	Domesticated	Mexico	Yucatán	Escondido		19.7781	-89.0389
18	BGS-3	Dom_MI	2	CICY	Domesticated	Mexico	Yucatán	Xcumpich		21.0352	-89.6358
19	BGS-4	Dom_MI	2	CICY	Domesticated	Mexico	Campeche	Bolonchen		20.0061	-89.7497
20	BGS-5	Dom_MI	2	CICY	Domesticated	Mexico	Quintana Roo	Tuzik		19.9153	-89.1597
21	BGS-6	Dom_MI	2	CICY	Domesticated	Mexico	Yucatán	Xul		20.0982	-89.4629
22	BGS-7	Dom_MI	2	CICY	Domesticated	Mexico	Yucatán	Santa Clara		21.3733	-89.0151
23	BGS-8	Dom_MI	2	CICY	Domesticated	Mexico	Yucatán	Sabakché		20.3153	-89.0275
24	BGS-9	Dom_MI	2	CICY	Domesticated	Mexico	Quintana Roo	Divorciados		19.0764	-88.4564
25	G25108-ELS	Dom_MII	5	CIAT	Domesticated	Brazil	Minas Gerais	Vi_osa	719	-20.76	-42.9	83	43			M1.M4/M5
26	G25148-ELS	Dom_MI	2	CIAT	Domesticated	Brazil	Pernambuco	Caruaru	595	-8.28	-35.97	37.7	54	113	141	M1
27	G25167B-ELS	Dom_AI	3	CIAT	Domesticated	United States	California	Ventura County		34.3	-119.31	92	48	103	275	A6
28	G25172-ELS	Dom_AI	3	CIAT	Domesticated	Peru	Ica	Pisco	5	-13.71	-76.22	138	37	180		A3
29	G25195-COR	Dom_MII	5	CIAT	Domesticated	Guatemala	Jalapa	San Pedro Pinula	900	14.71	-89.91	51	54			M1
30	G25207-ELS	Dom_MI	2	CIAT	Domesticated	Colombia	Valle Del Cauca	Tulua		4.11	-76.19	45.2	65	127	227	M1.M2
31	G25215-ELS	Dom_MI	2	CIAT	Domesticated	United States	California					36.8	42	180		M1
32	G25216-ELS	Dom_MI	2	CIAT	Domesticated	Guatemala	Alta Verapaz	San Cristobal Verapaz		15.38	-90.4	40.8	70			M1
33	G25217-ELS	Dom_admixed	2	CIAT	Domesticated	United States	Arizona	Pima County				68	41	113	148	M1
34	G25222-COR	Wild_MII	5	CIAT	Wild	Guatemala	Zacapa	Gualan	50	15.11	-89.37	5	96			M1.M4
35	G25224A-ELS	Dom_MI	2	CIAT	Domesticated	Costa Rica	Guanacaste	Ca_as	100	10.77	-85.49	47	44			M4/M5
36	G25227-COR	Wild_MII	5	CIAT	Wild	Costa Rica	Heredia	Heredia	1100	10.02	-84.14	4	64			M1
37	G25228-ELS-2	Wild_MI	4	CIAT	Wild	Mexico	Nayarit	Compostela	600	20.91	-105.39	6	64			M1
38	G25229-ELS	Wild_MI	4	CIAT	Wild	Mexico	Nayarit	Sayulita	500	20.84	-105.41	4	67			M1
39	G25230-ELS	Wild_MI	4	CIAT	Wild	Mexico	Colima	Manzanillo	3	19.05	-104.24	7	78			M2
40	G25231-COR	Wild_MI	4	CIAT	Wild	Mexico	Colima	Manzanillo	3	19.04	-104.22	6	54			M1.M4/M5
41	G25233-COR	Wild_MI	4	CIAT	Wild	Belize	Cayo District	Listowel	40	17.21	-89.03	9.8	90			M1
42	G25234-COR	Wild_MII	5	CIAT	Wild	Mexico	Yucatan	Oxkutzcab	10	20.32	-89.42	11.8	61	152		M9.M1
43	G25236-ELS	Dom_MI	2	CIAT	Domesticated	Argentina	Buenos Aires	Buenos Aires	1100	-34.77	-58.55	38	37			M1
44	G25254-ELS	Dom_MI	2	CIAT	Domesticated	Guatemala	Suchitepequez	Mazatenango	371	14.54	-91.5	39.6	46			M1
45	G25267-COR	Dom_MI	2	CIAT	Domesticated	El Salvador	San Salvador	San Salvador		13.7	-89.22	42	55	118	140	M1
46	G25272D-COR	Wild_MII	5	CIAT	Wild	Guatemala	Santa Rosa	Cuilapa	893	14.28	-90.31	6.1				M1
47	G25273A-COR	Wild_MII	5	CIAT	Wild	El Salvador	Ahuachapan	Ahuachapan	754	13.96	-89.82	6.5	147			M1
48	G25277-COR	Dom_AI	3	CIAT	Domesticated	El Salvador	Cuscatlan	Cojutepeque	800	13.71	-88.97	40	55			M1
49	G25278-ELS	Dom_MI	2	CIAT	Domesticated	El Salvador	Cuscatlan	Cojutepeque	800	13.71	-88.97	48	63	118	202	M1
50	G25284-ELS	Wild_MII	5	CIAT	Wild	Guatemala	Jalapa	Jalapa	1362	14.62	-89.99	7				M1.M6(LERG
51	G25293-ELS	Dom_admixed	2	CIAT	Domesticated	Mexico	Guerrero	Iguala		18.35	-99.53	49.9	53			M1
52	G25303-COR	Dom_MII	5	CIAT	Domesticated	Mexico	Chiapas	Comitan De Dominguez		16.25	-92.13	32				M4
53	G25364-ELS	Dom_MI	2	CIAT	Domesticated	El Salvador	La Libertad	Nueva San Salvador	965	13.67	-89.31	41.8	49			M1
54	G25366-ELS	Dom_MI	2	CIAT	Domesticated	El Salvador	Santa Ana	Texistepeque	400	14.12	-89.49	46	49			M1
55	G25385B-COR	Dom_MII	5	CIAT	Domesticated	Costa Rica	San Jose	San Jose	1171	9.99	-84.07	38	42			M1
56	G25388-COR	Dom_MII	5	CIAT	Domesticated	Costa Rica	San Jose	San Jose	1171	9.99	-84.07	56				M1
57	G25391B-COR	Dom_MII	5	CIAT	Domesticated	Costa Rica	San Jose	San Jose	1171	9.99	-84.07	35	49			M1
58	G25397-ELS	Dom_MI	2	CIAT	Domesticated	Costa Rica	Alajuela	Alajuela	940	10	-84.2	79	67	158	210	M1
59	G25400-ELS	Dom_AI	3	CIAT	Domesticated	Colombia	Cauca	Patia	988	2.12	-76.96	33	44			M1
60	G25408-ELS	Dom_MI	2	CIAT	Domesticated	Colombia	Nariño	Pasto	2000	1.49	-77	27	60			M1
61	G25410-ELS	Dom_MI	2	CIAT	Domesticated	Ecuador	Los Rios	Quevedo	106	-0.99	-79.45	32	60	118	194	M1
62	G25420-ELS	Dom_AI	3	CIAT	Domesticated	Peru	Piura	Talara		-4.57	-81.27	117	64			A3
63	G25514-ELS	Dom_MI	2	CIAT	Domesticated	Colombia	Cordoba	Pueblo Nuevo		8.51	-75.42	38	78			M1
64	G25531-ELS	Dom_MI	2	CIAT	Domesticated	Colombia	Tolima	Honda	225	5.21	-74.74	29	58	110	210	M1
65	G25540-ELS	Dom_AI	3	CIAT	Domesticated	Argentina	Salta	Coronel Moldes	1143	-25.27	-65.5	70	43			A3
66	G25541-ELS	Dom_MI	2	CIAT	Domesticated	Argentina	Tucuman	San Miguel De Tucuman		-26.88	-65.25	37.4	58	117	174	M1
67	G25542-COR	Dom_MI	2	CIAT	Domesticated	Argentina	Corrientes	Goya		-28.97	-59.09	47	53			M1
68	G25543-COR	Dom_MI	2	CIAT	Domesticated	Argentina	Santiago Del Estero	Santiago Del Estero	199	-27.83	-64.31	40	38			M1
69	G25559-COR	Dom_MII	5	CIAT	Domesticated	Mexico	Chiapas	Bochil	1200	17	-92.89	35	65			M1.M9
70	G25581-COR	Dom_MII	5	CIAT	Domesticated	Bolivia	Santa Cruz	Cordillera	750	-18.48	-63.26	50	45	104	258	M1
71	G25586-COR	Wild_MII	5	CIAT	Wild	Costa Rica	Guanacaste	Liberia	150	10.65	-85.47	5	39			M1
72	G25587-ELS	Dom_MI	2	CIAT	Domesticated	United States	Florida	Monroe County		24.55	-81.8	37	89	150	266	M1
73	G25592-ELS	Dom_MI	2	CIAT	Domesticated	United States	Maryland					163.6	67	188	250	A6
74	G25594-ELS	Dom_AI	3	CIAT	Domesticated	United States	Maryland					144.5	75	188	250	A6
75	G25596A-COR	Dom_MII	5	CIAT	Domesticated	Costa Rica	San Jose	Heredia	1200	9.97	-84.15	52	59	117	166	M1
76	G25597-ELS	Dom_MI	2	CIAT	Domesticated	Guatemala	Santa Rosa	Cuilapa		14.27	-90.3	42.3	54			M1
77	G25614-ELS	Dom_MI	2	CIAT	Domesticated	Mexico	Oaxaca	San Fco. Telixtlahuaca	1520	17.3	-96.9	60	50			M1
78	G25635A-ELS	Dom_MI	2	CIAT	Domesticated	United States						63.7	87	164	385	M1
79	G25656-ELS	Dom_MI	2	CIAT	Domesticated	United States	Arizona	Navajo County		35.79	-110.5	57.1	48			M1
80	G25656A-ELS	Dom_MI	2	CIAT	Domesticated	United States	Arizona	Navajo County		35.79	-110.5	62	77	150	199	M1
81	G25657-ELS	Dom_MI	2	CIAT	Domesticated	United States	Arizona	Navajo County		35.79	-110.5	51	52			M1
82	G25657A-ELS	Dom_MI	2	CIAT	Domesticated	United States	Arizona	Navajo County		35.79	-110.5	52.4	53	114	199	M1
83	G25657B-ELS	Dom_MI	2	CIAT	Domesticated	United States	Arizona	Navajo County		35.79	-110.5	47.3	65	159	199	M1
84	G25664-ELS	Dom_MI	2	CIAT	Domesticated	United States						45.5	40			M1
85	G25700A-ELS	Dom_MI	2	CIAT	Domesticated	Panama	Cocle	Toabre	200	8.67	-80.29	68				M1
86	G25702-ELS	Dom_AI	3	CIAT	Domesticated	Colombia	Nariño	Imues	1800	1.05	-77.52	110	102	160	259	A3
87	G25703-ELS	Dom_MI	2	CIAT	Domesticated	Colombia	Nariño	Buesaco	2000	1.39	-77.15	36				M1
88	G25704-COR	Wild_MII	5	CIAT	Wild	Mexico	Jalisco	Zapopan	1390	20.8	-103.41	15.3	83			M1
89	G25705-COR	Dom_MI	2	CIAT	Domesticated	Mexico	Campeche	Hopelchen	100	19.42	-89.7	34	66	132	212	M1.M4
90	G25735-ELS	Dom_MI	2	CIAT	Domesticated	Mexico	Campeche	Hecelchakan	40	20.24	-89.94	40	80	130	220	M1
91	G25737-COR	Wild_MII	5	CIAT	Wild	Mexico	Campeche	Hecelchakan	60	20.22	-89.99	12	53			M1.M2.M4M9
92	G25750-COR	Dom_MII	5	CIAT	Domesticated	Mexico	Campeche	Calkini	20	20.41	-90.24	34.2	47			M1
93	G25762-COR	Wild_MII	5	CIAT	Wild	Mexico	Campeche	Hopelchen	80	19.77	-89.87	12	50	122	167	M8.M1(LERG
94	G25766-ELS	Dom_MI	2	CIAT	Domesticated	Mexico	Campeche	Hecelchakan	20	20.14	-90.22	39	49	122	143	M1
95	G25770-COR	Dom_MI	4	CIAT	Domesticated	Mexico	Campeche	Hecelchakan	60	20.2	-89.91	32	62	114	146	M1
96	G25771-ELS	Dom_MI	2	CIAT	Domesticated	Mexico	Campeche	Hecelchakan	60	20.2	-89.91	47				M1
97	G25785-COR	Wild_MII	5	CIAT	Wild	Mexico	Campeche	Hopelchen	140	20.05	-89.74	12.2	54	122	146	M1.M9(LERG
98	G25787-ELS	Dom_MI	2	CIAT	Domesticated	Mexico	Campeche	Hopelchen	120	19.59	-89.61	40				M1
99	G25802-ELS	Dom_MI	4	CIAT	Domesticated	Colombia	Cauca	Popayan	1850	2.47	-76.54	115	90	153	259	A3
100	G25804-ELS	Dom_AI	3	CIAT	Domesticated	Colombia	Huila	San Agustin	2250	1.9	-76.28	115	105	200	234	A3
101	G25810-ELS	Dom_AI	3	CIAT	Domesticated	Colombia	Valle Del Cauca	La Union	1000	4.54	-76.09	43	68	133	162	M1
102	G25811-ELS	Dom_MI	2	CIAT	Domesticated	Colombia	Sucre	Ovejas		9.57	-75.2	46				M1
103	G25815D-ELS	Dom_MI	2	CIAT	Domesticated	Colombia	Cordoba	Pueblo Nuevo	50	8.42	-75.29	43.3	51			M1
104	G25816-ELS	Wild_MII	5	CIAT	Wild	Mexico	Yucatan	Izamal	30	20.95	-89.03	11	58			M1.M9(LERG
105	G25818-ELS	Wild_MII	5	CIAT	Wild	Panama	Colon	San Carlos	40	8.49	-79.95	5	118			M6
106	G25819-COR	Wild_MII	5	CIAT	Wild	Colombia	Magdalena	Cienaga	580	10.89	-74.06	10.9	72			M1
107	G25843-ELS	Wild_admixed	4	CIAT	Wild	Mexico	Morelos	Zacatepec	900	18.66	-99.21	12	67	135	161	M3
108	G25844-COR	Wild_AI	3	CIAT	Wild	Guatemala	Sacatepequez	Santa Maria De Jesus	1740	14.48	-90.71	8.8	199			M5
109	G25850-COR	Wild_MII	5	CIAT	Wild	Guatemala	Escuintla	Escuintla	820	14.4	-90.86	6	101	163	192	M1
110	G25854-ELS	Dom_MI	2	CIAT	Domesticated	Colombia	Nariño	Ancuya	1160	1.25	-77.52	36	75	120	180	M1
111	G25861-ELS	Dom_MI	2	CIAT	Domesticated	Colombia	Nariño	Taminango	1560	1.57	-77.29	39	66	146	252	M1
112	G25894-ELS	Dom_MI	2	CIAT	Domesticated	Colombia	Nariño	La Union	1630	1.62	-77.15	69	75	146	259	A3
113	G25900-ELS	Dom_AI	3	CIAT	Domesticated	Colombia	Nariño	La Cruz	2170	1.63	-76.97	118	82			A3
114	G25901-ELS	Dom_AI	3	CIAT	Domesticated	Colombia	Nariño	San Bernardo	1870	1.5	-77.04	85	50			A3
115	G25904-ELS	Dom_AI	3	CIAT	Domesticated	Colombia	Nariño	Iles	2270	0.99	-77.49	94	78	137	232	A4
116	G25907-ELS	Dom_AI	3	CIAT	Domesticated	Colombia	Nariño	Contadero	2280	0.91	-77.54	110	68	135	177	A3
117	G25908-ELS	Dom_AI	3	CIAT	Domesticated	Colombia	Putumayo	Sibundoy	2040	1.2	-76.93	95	63	126	314	A3
118	G25909-ELS	Dom_AI	3	CIAT	Domesticated	Peru	Cajamarca	San Miguel	2150	-7.03	-78.86	79	86	140	232	A3
119	G25910-ELS	Dom_AI	3	CIAT	Domesticated	Colombia	Nariño	Guachavez	1900	1.25	-77.67	60	112	270	330	A3
120	G25913-COR	Wild_MI	5	CIAT	Wild	Peru	Cajamarca	Santa Cruz	1810	-6.63	-78.87	12	124			A2.H
121	G25914-ELS	Wild_AI	3	CIAT	Wild	Peru	Cajamarca	Santa Cruz	1750	-6.57	-78.81	16	56			A1
122	G25915-ELS	Wild_AI	3	CIAT	Wild	Peru	Cajamarca	San Pablo	2020	-7.13	-78.84	16.6	68	114	198	A6
123	G25963-ELS	Wild_MII	5	CIAT	Wild	Costa Rica	San Jose	Tarbaca	1450	9.81	-84.12	7				M1
124	G25964-COR	Wild_MII	5	CIAT	Wild	Costa Rica	San Jose	Alajuelita	1520	9.89	-84.12	8				M1
125	G25966-COR	Wild_MII	5	CIAT	Wild	Costa Rica	Cartago	La Union	1320	9.91	-84	7	113	120	192	M1
126	G25970-COR	Wild_MII	5	CIAT	Wild	Mexico	Morelos	Yautepec	1250	18.92	-99.04	10	113	150	240	M1
127	G25971-ELS	Dom_admixed	2	CIAT	Domesticated	Mexico	Morelos	Tepoztlan	1850	18.99	-99.07	40	107	194	228	M1
128	G25974-ELS	Dom_MI	2	CIAT	Domesticated	Guatemala	Jalapa	San Luis Jilotepeque	750	14.64	-89.74	57				M1
129	G25977-COR	Wild_MII	5	CIAT	Wild	Guatemala	Escuintla	Siquinala	490	14.32	-90.95	7.8	113			M2.M1(LERG)
130	G25981-ELS	Dom_AI	3	CIAT	Domesticated	Bolivia	Chuquisaca	Oropeza	1970	-18.92	-65.07	121.5	85	169	270	A3
131	G25987-COR	Dom_admixed	4	CIAT	Domesticated	Bolivia	Chuquisaca	Tomina	1930	-19.17	-64.52	102.1	30	160	219	A6
132	G26002-ELS	Dom_MII	5	CIAT	Domesticated	Brazil	Ceara	Campos Sales	557	-7.2	-40.25	59	93	150	318	M1
133	G26007-ELS	Dom_MI	2	CIAT	Domesticated	United States	California	Tuolumne County		37.84	-120.5	41.2	37	155		M1
134	G26141A-ELS	Dom_MI	2	CIAT	Domesticated	Brazil	Rio Grande Do Sul	Pelotas	7	-31.75	-52.33	40	42			M1
135	G26173-ELS	Dom_MI	2	CIAT	Domesticated	Mexico	Yucatan					42.4	37			M1
136	G26184-ELS	Dom_AI	3	CIAT	Domesticated	Peru	Ica	Ica	439	-14.07	-75.7	120	34			A3
137	G26290-ELS	Dom_MI	2	CIAT	Domesticated	Argentina	Formosa	Formosa	200	-26.18	-58.18	40	40			M1
138	G26291-ELS	Dom_admixed	2	CIAT	Domesticated	Mexico	Guerrero	Tlapehuala		18.25	-100.53	50				M1
139	G26300-ELS	Dom_MI	2	CIAT	Domesticated	Guatemala	Chimaltenango	San Martin Jilotepeque	1700	14.79	-90.79	66	58			M1
140	G26306-COR	Dom_MII	5	CIAT	Domesticated	Guatemala	Chiquimula	Quezaltepeque	700	14.56	-89.49	48	75	150	240	M1
141	G26309-ELS	Wild_MII	5	CIAT	Wild	Colombia	Magdalena	Cienaga	50	10.72	-74.12	10	83			M1
142	G26312-ELS	Dom_MI	2	CIAT	Domesticated	Colombia	Antioquia	Apartado	55	7.89	-76.62	45.4	95	150	300	M1
143	G26315-ELS	Dom_MI	2	CIAT	Domesticated	Colombia	Atlantico	Usiacuri	100	10.75	-74.99	45.2	75	120	180	M1
144	G26348-ELS	Wild_AI	3	CIAT	Wild	Peru	Cajamarca	Chota	1100	-6.35	-79.4	11.2	89			A3
145	G26354-ELS	Dom_MI	2	CIAT	Domesticated	United States	California					33.2	37			M11
146	G26355-COR	Wild_MII	5	CIAT	Wild	Mexico	Jalisco	Tepatitlan		21.05	-102.67	13	43			M1
147	G26358-COR	Wild_MI	4	CIAT	Wild	Mexico	Morelos	Tlayacapan	1350	18.91	-98.99	13	110	150	270	M3
148	G26359-COR	Wild_MI	4	CIAT	Wild	Mexico	Puebla	Tepeojuma		18.66	-98.49	12	129			M10
149	G26360-ELS	Wild_MI	4	CIAT	Wild	Mexico	Puebla	Atlixco	1600	18.74	-98.46	12.3	68			M10
150	G26438-ELS	Dom_MI	2	CIAT	Domesticated	Costa Rica	Cartago	Turrialba	750	9.9	-83.69	53	48			M1
151	G26444-ELS	Dom_MI	2	CIAT	Domesticated	Honduras	Intibuca	La Esperanza		14.29	-88.25	58				M1
152	G26459-ELS	Wild_AI	3	CIAT	Wild	Ecuador	Loja	Catamayo	1580	-3.94	-79.41	19.4	68	187		A2
153	G26460-COR	Wild_AI	3	CIAT	Wild	Ecuador	Loja	Loja	1800	-3.88	-79.29	15	70			A1
154	G26468-COR	Wild_AI	3	CIAT	Wild	Ecuador	Bolivar	Sn Miguel	870	-1.79	-79.14	13	104			A1
155	G26480-ELS	Dom_AI	3	CIAT	Domesticated	Ecuador	Imbabura	Ibarra	2050	0.37	-78.14	64.4	99			A3
156	G26487-ELS	Dom_MI	2	CIAT	Domesticated	Colombia	Huila	San Jose De Isnos	1650	1.89	-76.22	76.4	98	162	245	A3
157	G26488-ELS	Dom_AI	3	CIAT	Domesticated	Colombia	Huila	Palermo	1020	2.83	-75.55	32.7	55			M1
158	G26490-COR	Dom_MI	2	CIAT	Domesticated	Colombia	Huila	Teruel	850	2.74	-75.55	32.8	62			M1
159	G26498-ELS	Dom_MI	2	CIAT	Domesticated	Colombia	Tolima	Chaparral	980	3.69	-75.59	65.4	65			A3
160	G26505-COR	Dom_AI	3	CIAT	Domesticated	Colombia	Cundinamarca	La Mesa	1650	4.69	-74.45	58.4	58			A3
161	G26507-ELS	Dom_AI	3	CIAT	Domesticated	Colombia	Valle Del Cauca	El Dovio	1700	4.49	-76.31	64.4	56			A3
162	G26509-ELS	Dom_MI	2	CIAT	Domesticated	Colombia	Cauca	Caldono	1700	2.77	-76.47	46.8	56	152	196	M1
163	G26510-ELS	Dom_AI	3	CIAT	Domesticated	Colombia	Valle Del Cauca	Palmira	1500	3.59	-76.16	74.2	69	139	218	A3
164	G26512-ELS	Dom_MI	2	CIAT	Domesticated	Mexico	Guerrero	Ajuchitlan Del Progreso		18.16	-100.47	53.6	77			M1
165	G26513-COR	Dom_admixed	2	CIAT	Domesticated	Mexico	Guerrero	Ajuchitlan Del Progreso		18.06	-100.46	46	55	123	155	M1
166	G26517-ELS	Wild_MI	4	CIAT	Wild	Mexico	Guerrero	Ometepec	1140	16.67	-98.45	8.2	70			M1
167	G26518-ELS	Wild_MI	4	CIAT	Wild	Mexico	Guerrero	Ayutla De Los Libres	240	16.79	-99.19	7.4	70			M1
168	G26519-COR	Wild_MII	5	CIAT	Wild	Mexico	Guerrero	Ayutla De Los Libres	330	16.87	-99.25	7.4	75			M1
169	G26520-ELS	Dom_AI	3	CIAT	Domesticated	Colombia	Cauca	Balboa	1195	2.04	-77.19	33.6	65			M1
170	G26527-COR	Wild_MII	5	CIAT	Wild	Colombia	Cordoba	Sahagun	70	8.72	-75.47	10.2	78			M1
171	G26529-ELS	Dom_MI	2	CIAT	Domesticated	Colombia	Guajira	Fonseca		10.9	-72.86	49.7	63			M1
172	G26531-COR	Wild_MI	5	CIAT	Wild	Mexico	Chiapas	Ocosingo	890	16.91	-92.05	13.5	80			M1
173	G26533-ELS	Wild_MII	5	CIAT	Wild	Mexico	Chiapas	Tapachula	70	14.84	-92.27	9	75	132	190	M9
174	G26534-ELS	Dom_MI	2	CIAT	Domesticated	Mexico	Chiapas	Venustiano Carranza	890	16.34	-92.44	40	50			M1
175	G26541-COR	Wild_MII	5	CIAT	Wild	Mexico	Puebla	Tehuacan	820	18.16	-97.1	9.4	110			M3
176	G26542-ELS	Dom_admixed	2	CIAT	Domesticated	Mexico	Puebla	Tehuacan	1310	18.42	-97.33	52.4	60			M1
177	G26545-COR	Wild_AI	3	CIAT	Wild	Ecuador	Loja	Calvas	1800	-4.35	-79.59	17.7	97			A6.A3
178	G26547-ELS-2	Wild_AII	1	CIAT	Wild	Peru	Junin	Chanchamayo	980	-11.14	-75.37	12.5	92	120	318	M7.M5
179	G26578-COR	Dom_AI	3	CIAT	Domesticated	Ecuador	Pichincha	Puellaro	1990	0.05	-78.4	48.2	141	183	433	A1.A2=A.M.
180	G26608-ELS	Wild_MI	3	CIAT	Wild	Ecuador	El Oro	Zaruma	800	-3.39	-79.54	16.2	65			A1
181	G26609-ELS	Wild_AI	3	CIAT	Wild	Ecuador	Azuay	Santa Isabel	1570	-3.22	-79.21	22.2	189	272		A2.A11=A.M
182	G26613-ELS	Wild_MII	5	CIAT	Wild	Colombia	Boyaca	Guateque	1640	5	-73.49	21.2	75			M8
183	G26614-ELS	Dom_AII	1	CIAT	Domesticated	Colombia	Boyaca	Guateque	1320	4.99	-73.49	78.6	87			A3
184	G26615-ELS-2	Wild_AII	1	CIAT	Wild	Colombia	Boyaca	Guateque	1320	4.99	-73.49	17.4	71			M8
185	G26616-ELS	Wild_AII	1	CIAT	Wild	Colombia	Boyaca	Guayata	1360	4.97	-73.5	15.2	102			M8
186	G26617-ELS	Dom_AI	3	CIAT	Domesticated	Colombia	Boyaca	Somondoco	1900	4.96	-73.46	78.2	69	126	170	A3
187	G26618-COR	Wild_admixed	1	CIAT	Wild	Colombia	Boyaca	Tenza	1440	5.07	-73.41	19.4	135			H/A15?
188	G26618A-ELS	Wild_AII	1	CIAT	Wild	Colombia	Boyaca	Tenza	1440	5.07	-73.41	24	42			M8
189	G26619-ELS	Wild_admixed	1	CIAT	Wild	Colombia	Boyaca	Garagoa	1240	5.04	-73.39	17.4	73			M1
190	G26620-ELS	Dom_AII	1	CIAT	Domesticated	Colombia	Nariño	Policarpa	1500	1.65	-77.4	39.4	63			M1
191	G26621-ELS	Dom_MI	2	CIAT	Domesticated	Colombia	Nariño	Taminango	1200	1.66	-77.32	43.3	57			M1
192	G26622-ELS	Dom_AI	3	CIAT	Domesticated	Colombia	Nariño	El Rosario	1660	1.77	-77.39	79.8	157	202	433	A12
193	G26623-ELS	Dom_AI	3	CIAT	Domesticated	Colombia	Risaralda	El Santuario	1500	5.09	-75.96	79.8	128	173	239	A3
194	G26626-ELS	Dom_MI	2	CIAT	Domesticated	Colombia	Risaralda	Balboa	1540	4.93	-75.96	45	53			M1
195	G26627-ELS	Dom_MI	2	CIAT	Domesticated	Colombia	Valle Del Cauca	Ginebra	1000	3.69	-76.23	43.2	65			M1
196	G26628-COR	Wild_MII	5	CIAT	Wild	Honduras	El Paraiso	El Paraiso	840	13.84	-86.54	7.5	104			M1.M6
197	G26630-COR	Wild_AI	3	CIAT	Wild	Honduras	Olancho	San Francisco De La Paz	830	14.94	-86.22	8.7	118			M1
198	G26631-COR	Wild_MII	5	CIAT	Wild	Honduras	Yoro	Potrerillos	210	15.41	-86.45	8.4	69			M1
199	G26633-COR	Wild_MII	5	CIAT	Wild	Honduras	Copan	Santa Rosa Copan	860	14.77	-88.69	8.4	111			M1
200	G26634-COR	Wild_MII	5	CIAT	Wild	Honduras	Francisco Morazan	Sabana Grande	980	13.82	-87.27	8.6	57			M1
201	G26635-COR	Wild_MII	5	CIAT	Wild	Honduras	Francisco Morazan	Sabana Grande	840	13.77	-87.17	7.4	55			M1
202	G26639-ELS	Dom_AI	3	CIAT	Domesticated	Colombia	Antioquia	Betania	1140	5.74	-75.96	66.4	69			A3
203	G26647-ELS	Dom_MI	2	CIAT	Domesticated	Colombia	Antioquia	Ebejico	1390	6.37	-75.73	38	61			M1
204	G26649-ELS	Dom_MI	2	CIAT	Domesticated	Colombia	Antioquia	Santa Fe De Antioquia	550	6.56	-75.86	43.4	52	188	257	M1
205	G26651-ELS	Dom_AI	3	CIAT	Domesticated	Colombia	Antioquia	Abejorral	1800	5.74	-75.48	72.6	130	183	239	A3
206	G26652-COR	Wild_MII	5	CIAT	Wild	Guatemala	Guatemala	Mixco	1550	14.62	-90.57	11.6	85			M6
207	G26653-COR	Wild_AI	3	CIAT	Wild	Guatemala	Huehuetenango	Sta. Ana Huista	590	15.69	-91.91	11.6	40			M5
208	G26655-COR	Wild_AI	3	CIAT	Wild	Guatemala	Sacatepequez	Alotenango	1000	14.42	-90.82	8.3	58			M5
209	G26656-COR	Dom_admixed	4	CIAT	Domesticated	Colombia	Valle Del Cauca	Candelaria	1000	3.42	-76.32	70.5	90			A3
210	G26659-ELS	Dom_AI	3	CIAT	Domesticated	Ecuador	Imbabura	Ibarra	2120	0.37	-78.11	111.5	84			A3
211	G26672-COR	Dom_MII	5	CIAT	Domesticated	Ecuador	Carchi	Mira	2170	0.54	-78.06	75.4	95	177	267	A3
212	G26679-COR	Wild_MII	5	CIAT	Wild	Guatemala	Chimaltenango	El Tejar	1700	14.64	-90.78	12.3	133	211		M1
213	G26680-ELS	Wild_admixed	5	CIAT	Wild	Guatemala	Escuintla	Escuintla	520	14.36	-90.81	7.7	112			M1
214	G26681-ELS	Wild_MII	5	CIAT	Wild	Guatemala	Suchitepequez	Patulul	230	14.41	-91.19	6.7	102			M1
215	G26683-COR	Wild_MII	5	CIAT	Wild	Guatemala	Quezaltenango	Zunil	1750	14.77	-91.5	11.1	86			M6
216	G26684-COR	Wild_AI	3	CIAT	Wild	Guatemala	Solola	Panajachel	1680	14.77	-91.17	11.3	111			M6.M2
217	G26685-ELS	Wild_MII	5	CIAT	Wild	Argentina	Salta	San Martin	650	-22.96	-63.87	13.5	69			M1
218	G26686-COR	Wild_MII	5	CIAT	Wild	Guatemala	El Progreso	San Agustin Acasaguastlan	750	15.05	-89.94	13.2	56	210		M5.M1
219	G26687-ELS	Wild_AII	1	CIAT	Wild	Colombia	Cundinamarca	Macheta	1680	5.09	-73.56	15.3	140	202		M8
220	G26688-COR	Wild_AII	1	CIAT	Wild	Colombia	Cundinamarca	Tibirita	1520	5.04	-73.52	16.7	88	223		M8
221	G26689-ELS	Wild_AII	1	CIAT	Wild	Colombia	Boyaca	Guateque	1700	5	-73.48	14.4	85	225		M8
222	G26690-ELS	Wild_AII	1	CIAT	Wild	Colombia	Boyaca	Guateque	1440	4.99	-73.49	13.8	109			M8
223	G26691-ELS	Wild_AII	1	CIAT	Wild	Colombia	Boyaca	Guateque	1620	5.02	-73.46	11.6	125	190	282	M8
224	G26692-COR	Wild_AII	1	CIAT	Wild	Colombia	Boyaca	Sutatenza	1760	5.03	-73.45	13.9	251	190	282	M8
225	G26693-ELS	Wild_AII	1	CIAT	Wild	Colombia	Boyaca	Tenza	1530	5.06	-73.42	12.2	75			M8
226	G26694-ELS	Wild_AII	1	CIAT	Wild	Colombia	Boyaca	Tenza	1510	5.07	-73.44	12.4	75			M8
227	G26695-ELS	Wild_AII	1	CIAT	Wild	Colombia	Boyaca	Tenza	1440	5.07	-73.41	13.7	75			M8
228	G26696-ELS	Wild_AII	1	CIAT	Wild	Colombia	Boyaca	Tenza	1335	5.07	-73.41	16.5	70			M8
229	G26697-ELS	Wild_admixed	1	CIAT	Wild	Colombia	Boyaca	Garagoa	1325	5.07	-73.39	11.5	77			M8
230	G26698-ELS	Wild_AII	1	CIAT	Wild	Colombia	Boyaca	Garagoa	1490	5.14	-73.36	14	69			M8
231	G26699-COR	Wild_AII	1	CIAT	Wild	Colombia	Boyaca	Garagoa	1430	5.12	-73.39	12.2	140			M8
232	G26701A-ELS	Wild_AII	1	CIAT	Wild	Colombia	Boyaca	Macanal	1270	4.99	-73.34	11.2	110	130	237	M1
233	G26702-ELS	Dom_MI	2	CIAT	Domesticated	Colombia	Caldas	Palestina	1570	5.02	-75.62	60.3	50	126	176	M1
234	G26703-ELS	Dom_AI	3	CIAT	Domesticated	Colombia	Caldas	Manizales	1570	5.15	-75.69	78.2	65	154		A3
235	G26704-ELS	Wild_admixed	5	CIAT	Wild	Colombia	Caldas	Aguadas	1485	5.62	-75.53	17	295			M1
236	G26705-ELS	Dom_MI	2	CIAT	Domesticated	Colombia	Caldas	Pacora	1740	5.48	-75.47	48.5	91	169	266	M1
237	G26706-COR	Dom_MI	2	CIAT	Domesticated	Colombia	Caldas	Aguadas	1485	5.62	-75.53	37.3	69			M1
238	G26714-COR	Dom_MI	2	CIAT	Domesticated	Ecuador	Manabi	Chone	67	-0.67	-80.09	39.3	51			M1
239	G26717-ELS	Dom_MI	2	CIAT	Domesticated	Colombia	Magdalena	Salamina	10	10.58	-74.71	38.8	57			M1
240	G26718-ELS	Dom_MI	2	CIAT	Domesticated	Colombia	Valle Del Cauca	Vijes	1030	3.69	-76.47	34.8	60			M1
241	G26721-COR	Wild_MII	5	CIAT	Wild	Ecuador	Azuay	Santa Isabel	470	-3.32	-79.58	14	150			A1
242	G26731-ELS	Wild_MII	5	CIAT	Wild	Guatemala	El Progreso	San Agustin Acasaguastlan	270	14.94	-89.96	6.8	140			M1
243	G26732-COR	Wild_AI	3	CIAT	Wild	Guatemala	Jalapa	Sn Luis Jilotepeque	1280	14.67	-89.79	10.6				M1
244	G26733-COR	Wild_MII	5	CIAT	Wild	Guatemala	Santa Rosa	San Rafael Las Flores	1380	14.46	-90.14	8.2	140			M1
245	G26734-COR	Wild_MII	5	CIAT	Wild	Guatemala	Escuintla	San Vicente Pacaya	1430	14.4	-90.64	9	141			M3.M6
246	G26737-COR	Wild_AII	1	CIAT	Wild	Colombia	Cundinamarca	Tibirita	1480	5.04	-73.54	15	161			M1
247	G26740-COR	Wild_MII	5	CIAT	Wild	Mexico	Oaxaca	Juchitan De Zaragoza	30	16.46	-95.04	4.8	110			M1.M3.M2
248	G26741-ELS	Wild_MI	4	CIAT	Wild	Mexico	Oaxaca	Juquila	20	15.97	-97.12	6.8	93			M2.M1
249	G26742-ELS	Wild_MI	4	CIAT	Wild	Mexico	Oaxaca	Juquila	40	15.98	-97.47	5.9	93			M7
250	G26748-ELS	Dom_MI	2	CIAT	Domesticated	Colombia	Valle Del Cauca	Roldanillo	1150	4.4	-76.17	42.4	64	225		M1
251	G26753-COR	Wild_AI	3	CIAT	Wild	Mexico	Chiapas	Venustiano Carranza	775	16.34	-92.46	8	93			M1
252	G26754-ELS	Wild_MII	5	CIAT	Wild	Mexico	Chiapas	Teopisca	1155	16.49	-92.52	7	71			M1
253	G27289-COR	Dom_MII	5	CIAT	Domesticated	Cuba	Ciego De Avila	Moron	10	22.11	-78.64	44.6	88	210		M1
254	G27291-ELS	Dom_MI	2	CIAT	Domesticated	Colombia	Meta	Villavicencio	100	4.15	-73.65	40.2	70	240		M1
255	G27292-COR	Wild_MII	5	CIAT	Wild	Costa Rica	Guanacaste	Las Juntas	1180	10.33	-84.86	6.7	495			M1
256	G27298-COR	Wild_MII	5	CIAT	Wild	Colombia	Magdalena	Mamatoco	280	11.27	-74.09	4.5	64			M1
257	G27337-ELS	Dom_AI	3	CIAT	Domesticated	Bolivia	Chuquisaca	Tomina	2980	-19.19	-64.46	90.3	56			A3
258	G27345-ELS	Wild_MII	5	CIAT	Wild	Guatemala	San Marcos	San Rafael Pie De La Cuesta	900	14.92	-91.94	10				M1.M5
259	G27350A-COR	Dom_MI	2	CIAT	Domesticated	Ecuador	Azuay	Paute	2180	-2.87	-78.84	23				M1
260	G27358-ELS	Dom_MI	2	CIAT	Domesticated	Peru	San Martin	San Martin	425	-6.51	-76.38	33	47			M4/M5
261	G27381-COR	Dom_MI	2	CIAT	Domesticated	Honduras	Intibuca	La Esperanza		14.3	-88.18	107.4				M1
262	G27387-COR	Wild_MII	5	CIAT	Wild	Costa Rica	Alajuela	Alajuela	930	9.99	-84.2	9.2	126	206	311	M5
263	G27388-ELS	Dom_admixed	2	CIAT	Domesticated	Mexico	Guerrero	Zitlala		17.68	-99.19	55.7	75			M1
264	G27399-ELS	Dom_MI	2	CIAT	Domesticated	Mexico	Veracruz	Papantla		20.47	-97.46	42	46			M1
265	G27419-ELS	Dom_MI	2	CIAT	Domesticated	Colombia	Sucre	Coloso	130	9.5	-75.36	46.9	68			M1
266	G27420-ELS	Wild_MII	5	CIAT	Wild	Colombia	Atlantico	Baranoa	120	10.81	-74.95	15.8				M1
267	G27422-COR	Dom_MI	2	CIAT	Domesticated	Colombia	Magdalena	Plato	100	9.84	-74.34	32.6				M1
268	G27423-ELS	Dom_MI	2	CIAT	Domesticated	Colombia	Bolivar	Talaigua Nuevo	23	9.3	-74.57	40.1	68			M1
269	G27424-ELS	Dom_MI	2	CIAT	Domesticated	Colombia	Atlantico	Baranoa	120	10.81	-74.95	40.6				M1
270	G27429-ELS	Dom_MI	2	CIAT	Domesticated	Colombia	Cordoba	Sahagun	60	8.96	-75.46	38.4				M1
271	G27435-ELS	Dom_admixed	5	CIAT	Domesticated	Colombia	Atlantico	Baranoa	120	10.81	-74.95	12.1	76			M1
272	G27441-COR	Wild_MII	5	CIAT	Wild	Colombia	Atlantico	Baranoa	120	10.81	-74.95	13.8				M1
273	G27442-COR	Wild_MII	5	CIAT	Wild	Colombia	Atlantico	Baranoa	100	10.81	-74.95	8	76			M1
274	G27445-COR	Dom_MI	2	CIAT	Domesticated	Colombia	Atlantico	Juan De Acosta	50	10.84	-75.04	21.1	60			M1
275	G27448-COR	Dom_admixed	5	CIAT	Domesticated	Colombia	Bolivar	El Carmen	160	9.75	-75.27	16.2				M1
276	G27454-ELS	Dom_MI	2	CIAT	Domesticated	Colombia	Atlantico	Baranoa	120	10.81	-74.95	39.3	48			M1
277	G27455-ELS	Dom_MI	2	CIAT	Domesticated	Colombia	Sucre	Chalan	100	9.55	-75.32	30.4				M1.M11
278	G27456-ELS	Dom_MI	2	CIAT	Domesticated	Colombia	Magdalena	Ariguani	170	9.86	-74.21	33				M1
279	G27462-ELS	Dom_MI	2	CIAT	Domesticated	Colombia	Sucre	Ovejas	1100	9.62	-75.31	37.3	43	80	303	M1
280	G27532-ELS	Dom_MI	2	CIAT	Domesticated	United States	Iowa					38.1	45	83	265	M1
281	G27578-COR	Wild_MII	5	CIAT	Wild	Guatemala	Chimaltenango	San Jose Poaquil	1530	14.89	-90.95	10.7	208	286	348	M3.M6
282	G27579-ELS	Wild_MII	5	CIAT	Wild	Guatemala	Guatemala	Fraijanes	1700	14.5	-90.42	7.5	141	203	293	M1
283	G27608-COR	Wild_MII	5	CIAT	Wild	El Salvador	Santa Ana	Santa Ana	1775	13.84	-89.62	8.9		249		M1
284	G27611-ELS	Wild_MII	5	CIAT	Wild	Costa Rica	Puntarenas	Coto Brus	603	8.84	-83.09	10.3				M6
285	G27613-COR	Wild_MII	5	CIAT	Wild	Costa Rica	Heredia	Heredia	1149	10	-84.08	6.9	88	176	254	M1
286	G27622-ELS	Dom_MI	2	CIAT	Domesticated	Chile	Region Ix Malleco (Region De La Araucania)	Pur_n	190	-38.02	-73.08	33.6	30			M1
287	IPL190	Dom_MI	2	CICY	Domesticated	Mexico
288	JMC_1003	Dom_MI	2	CICY	Domesticated	Mexico	Yucatán	Sierra de Ticul		20.3953	-89.5339
289	JMC_1005	Dom_MI	2	CICY	Domesticated	Mexico	Yucatán	Benito Juaréz		20.2031	-89.2878
290	JMC_1007	Dom_MI	2	CICY	Domesticated	Mexico	Yucatán	Benito Juaréz		20.2031	-89.2878
291	JMC_1010	Wild_MII	5	CICY	Wild	Mexico	Yucatán			20.2031	-89.2878
292	JMC_1012-COR	Wild_MII	5	CICY	Wild	Mexico	Yucatán		80	20.2031	-89.2878
293	JMC_1015	Wild_MII	5	CICY	Wild	Mexico	Yucatán			20.3953	-89.5339
294	JMC_1021-COR	Wild_MII	5	CICY	Wild	Mexico	Quintana Roo		11	21.1028	-87.3378
295	JMC_1024	Dom_MI	2	CICY	Domesticated	Mexico	Campeche	Bolonchen	130	20.0036	-89.7478
296	JMC_1035	Dom_MI	2	CICY	Domesticated	Mexico	Campeche	Chunyaxnic		20.0833	-89.8167
297	JMC_1048-COR	Dom_MI	2	CICY	Domesticated	Mexico	Campeche		70	19.8	-89.3292
298	JMC_1059	Dom_MI	2	CICY	Domesticated	Mexico	Quintana Roo	Tixcacal. guardia		19.8586	-88.175
299	JMC_1061-COR	Dom_MI	2	CICY	Domesticated	Mexico	Quintana Roo		30	19.8586	-88.175
300	JMC_1063-COR	Wild_MII	5	CICY	Wild	Mexico	Veracruz
301	JMC_1065	Wild_MII	5	CICY	Wild	Mexico	Oaxaca		160	16.7018	-94.9608
302	JMC_1068	Wild_MI	4	CICY	Wild	Mexico	Oaxaca			15.9803	-95.6374
303	JMC_1069	Wild_MI	4	CICY	Wild	Mexico	Oaxaca		137	15.7672	-96.26
304	JMC_1070	Wild_MI	4	CICY	Wild	Mexico	Oaxaca			15.7163	-96.5848
305	JMC_1072	Wild_MI	4	CICY	Wild	Mexico	Oaxaca			15.8853	-97.1108
306	JMC_1073	Wild_MI	4	CICY	Wild	Mexico	Oaxaca			15.9396	-97.1613
307	JMC_1074	Wild_MI	4	CICY	Wild	Mexico	Oaxaca		53	15.9574	-97.3644
308	JMC_1075	Wild_MI	4	CICY	Wild	Mexico	Oaxaca			16.0214	-97.5511
309	JMC_1076	Wild_MI	4	CICY	Wild	Mexico	Oaxaca			16.1654	-97.7411
310	JMC_1077	Wild_MII	5	CICY	Wild	Mexico	Oaxaca			16.5014	-94.8299
311	JMC_1078	Wild_MII	5	CICY	Wild	Mexico	Oaxaca			17.5493	-95.5734
312	JMC_1079	Wild_MII	5	CICY	Wild	Mexico	Oaxaca			17.5426	-95.6454
313	JMC_1080	Wild_MII	5	CICY	Wild	Mexico	Oaxaca			17.7563	-95.8063
314	JMC_1081	Wild_MII	5	CICY	Wild	Mexico	Oaxaca		90	17.9381	-96.1719
315	JMC_1082	Wild_MII	5	CICY	Wild	Mexico	Oaxaca		133	17.7864	-96.3292
316	JMC_1089-COR	Wild_MII	5	CICY	Wild	Guatemala	Petén		416	16.5231	-89.4197
317	JMC_1097-COR	Wild_MII	5	CICY	Wild	Guatemala	Petén		210	17.2258	-89.9539
318	JMC_1099-COR	Wild_MII	5	CICY	Wild	Guatemala	Petén		211	17.3761	-89.6333
319	JMC_1101-COR	Wild_MII	5	CICY	Wild	Guatemala	Petén		160	17.0164	-89.2944
320	JMC_1104-COR	Dom_MI	2	CICY	Domesticated	Guatemala	Petén		198	16.994	-89.9178
321	JMC_1105-COR	Dom_MI	2	CICY	Domesticated	Guatemala	Petén		198	16.994	-89.9178
322	JMC_1106-COR	Dom_MI	2	CICY	Domesticated	Guatemala	Petén		198	16.994	-89.9178
323	JMC_1108-COR	Wild_admixed	4	CICY	Wild	Mexico	Jalisco		700	20.86	-103.77
324	JMC_1109-COR	Wild_MI	4	CICY	Wild	Mexico	Guanajuato		1810
325	JMC_111	Dom_MI	2	CICY	Domesticated	Mexico	Quintana Roo		10	20.3589	-88.0364
326	JMC_1111	Wild_MI	4	CICY	Wild	Mexico	Nayarit			21.8936	-105.161
327	JMC_1112	Wild_MI	4	CICY	Wild	Mexico	Nayarit
328	JMC_1113	Wild_MI	4	CICY	Wild	Mexico	Nayarit		1491	22.4886	-105.377
329	JMC_1114	Wild_MI	4	CICY	Wild	Mexico	Sinaloa			22.7728	-105.851
330	JMC_1116	Wild_MI	4	CICY	Wild	Mexico	Sinaloa			23.2806	-106.468
331	JMC_1118	Wild_MI	4	CICY	Wild	Mexico	Sinaloa
332	JMC_1119	Wild_MI	4	CICY	Wild	Mexico	Sinaloa		125	23.6356	-106.579
333	JMC_112	Dom_MI	2	CICY	Domesticated	Mexico	Yucatán		27	20.599	-88.1634
334	JMC_1120	Wild_MI	4	CICY	Wild	Mexico	Sinaloa
335	JMC_1121	Wild_MI	4	CICY	Wild	Mexico	Sinaloa
336	JMC_1122	Wild_MI	4	CICY	Wild	Mexico	Sinaloa		60	24.8719	-107.471
337	JMC_1123	Wild_MI	4	CICY	Wild	Mexico	Sinaloa		212	25.3772	-107.557
338	JMC_1124	Wild_MI	4	CICY	Wild	Mexico	Sinaloa		79	23.1614	-106.091
339	JMC_1125-COR	Wild_MI	4	CICY	Wild	Mexico	Sinaloa		38	23.0464	-105.95
340	JMC_1127	Wild_MI	4	CICY	Wild	Mexico	Jalisco		140	20.8255	-105.09
341	JMC_1128	Wild_MI	4	CICY	Wild	Mexico	Jalisco			20.7944	-104.933
342	JMC_1129	Wild_MI	4	CICY	Wild	Mexico	Jalisco		10	20.6467	-105.237
343	JMC_1130	Wild_MI	4	CICY	Wild	Mexico	Jalisco			20.3008	-105.33
344	JMC_1131	Wild_MI	4	CICY	Wild	Mexico	Jalisco			20.1705	-105.333
345	JMC_1133	Wild_MI	4	CICY	Wild	Mexico	Jalisco		50	19.7526	-105.236
346	JMC_1134	Wild_MI	4	CICY	Wild	Mexico	Jalisco			19.6059	-105.115
347	JMC_1135	Wild_MI	4	CICY	Wild	Mexico	Jalisco		15	19.4242	-105.013
348	JMC_1136	Wild_MI	4	CICY	Wild	Mexico	Jalisco			19.2433	-104.71
349	JMC_1137	Wild_MI	4	CICY	Wild	Mexico	Jalisco			19.3988	-104.709
350	JMC_1138	Wild_MI	4	CICY	Wild	Mexico	Jalisco			19.4878	-104.639
351	JMC_1141	Wild_MII	5	CICY	Wild	Mexico	Jalisco			19.6604	-104.44
352	JMC_1142	Wild_MI	4	CICY	Wild	Mexico	Colima		10	19.1161	-104.102
353	JMC_1143	Wild_MI	4	CICY	Wild	Mexico	Colima			18.9486	-103.937
354	JMC_1144	Wild_MI	4	CICY	Wild	Mexico	Colima			18.6724	-103.675
355	JMC_1146	Wild_MI	4	CICY	Wild	Mexico	Michoacán		70	18.2533	-103.246
356	JMC_1149	Wild_MI	4	CICY	Wild	Mexico	Michoacán			18.002	-102.086
357	JMC_1150	Wild_MI	4	CICY	Wild	Mexico	Guerrero			17.7392	-101.739
358	JMC_1151	Wild_MI	4	CICY	Wild	Mexico	Guerrero			17.4987	-101.254
359	JMC_1152	Wild_MI	4	CICY	Wild	Mexico	Guerrero		36	17.3703	-101.084
360	JMC_1153	Wild_MI	4	CICY	Wild	Mexico	Guerrero			17.2617	-100.862
361	JMC_1154	Wild_MI	4	CICY	Wild	Mexico	Guerrero		10	17.1508	-100.492
362	JMC_1157	Wild_MI	4	CICY	Wild	Mexico	Veracruz			17.9178	-94.8579
363	JMC_1162-COR	Wild_MII	5	CICY	Wild	Mexico	Veracruz		300	18.434	-95.1573
364	JMC_1168	Wild_MII	5	CICY	Wild	Mexico	Veracruz		6	19.5997	-96.3983
365	JMC_1173-COR	Wild_MI	4	CICY	Wild	Mexico	Tamaulipas		340	22.8306	-99.3214
366	JMC_1174	Wild_MI	4	CICY	Wild	Mexico	Tamaulipas		214	22.5514	-99.0783
367	JMC_1175-COR	Wild_MII	5	CICY	Wild	Mexico	Veracruz		102	20.4328	-97.3747
368	JMC_1179	Dom_MI	2	CICY	Domesticated	Mexico	Quintana Roo		10
369	JMC_1186	Dom_MI	2	CICY	Domesticated	Mexico	Quintana Roo		78
370	JMC_1196	Dom_MI	2	CICY	Domesticated	Mexico	Quintana Roo	Kompocolche		19.8792	-88.3167
371	JMC_1197-COR	Dom_MI	2	CICY	Domesticated	Mexico	Quintana Roo		78	19.8833	-88.1333
372	JMC_1199	Dom_MI	2	CICY	Domesticated	Mexico	Yucatán		34	20.3694	-88.0864
373	JMC_1200	Dom_MI	2	CICY	Domesticated	Mexico	Quintana Roo			19.775	-88.1833
374	JMC_1201	Dom_MI	2	CICY	Domesticated	Mexico	Quintana Roo	Señor		21.1028	-87.3378
375	JMC_1215	Dom_MI	2	CICY	Domesticated	Mexico	Yucatán	Nenela		20.3497	-89.0193
376	JMC_1262-COR	Dom_MI	2	CICY	Domesticated	Mexico	Quintana Roo		15	18.5036	-88.3053
377	JMC_1265	Dom_MI	2	CICY	Domesticated	Mexico	Quintana Roo		25	19.8431	-88.1344
378	JMC_1277-COR	Dom_MI	2	CICY	Domesticated	Mexico	Yucatán
379	JMC_1284-COR	Dom_MI	2	CICY	Domesticated	Mexico	Campeche		80	19.5833	-89.5833
380	JMC_1288-COR	Dom_MI	2	CICY	Domesticated	Mexico	Yucatán		150	19.9786	-89.4883
381	JMC_13-COR	Dom_MI	2	CICY	Domesticated	Mexico	Quintana Roo		25	19.4944	-87.9944
382	JMC_1312-COR	Dom_MI	2	CICY	Domesticated	Mexico	Yucatán		34	20.4375	-88.3889
383	JMC_1325-COR	Dom_MI	2	CICY	Domesticated	Mexico	Yucatán		100	20.2031	-89.2878
384	JMC_1335-COR	Dom_MI	2	CICY	Domesticated	Mexico	Quintana Roo		42	19.0424	-88.4193
385	JMC_1377-COR	Dom_MI	2	CICY	Domesticated	Mexico	Chiapas		2161	16.7595	-92.7216
386	JMC_1378_A-COR	Dom_MI	2	CICY	Domesticated	Mexico	Chiapas		461	16.6237	-93.1005
387	JMC_1381_A-COR	Dom_MI	2	CICY	Domesticated	Mexico	Chiapas		608	15.957	-92.4671
388	JMC_1382_B-COR	Dom_MI	2	CICY	Domesticated	Mexico	Chiapas		603	15.766	-92.2677
389	JMC_1386-COR	Dom_MI	2	CICY	Domesticated	Mexico	Chiapas		820	16.7581	-93.3739
390	JMC_1388	Wild_MII	5	CICY	Wild	Mexico	Chiapas			17.4761	-91.9652
391	JMC_1389	Wild_MII	5	CICY	Wild	Mexico	Chiapas			16.6084	-93.4285
392	JMC_1390	Wild_MII	5	CICY	Wild	Mexico	Chiapas			16.1567	-93.2394
393	JMC_1391-COR	Wild_MII	5	CICY	Wild	Mexico	Chiapas			16.152	-93.1118
394	JMC_1392	Wild_MII	5	CICY	Wild	Mexico	Chiapas			16.1236	-93.0149
395	JMC_1393-COR	Wild_admixed	5	CICY	Wild	Mexico	Chiapas			16.6579	-93.0149
396	JMC_1394-COR	Wild_MII	5	CICY	Wild	Mexico	Chiapas			16.2772	-92.4404
397	JMC_1395	Wild_MII	5	CICY	Wild	Mexico	Tamaulipas			22.5353	-98.1248
398	JMC_1398	Wild_MII	5	CICY	Wild	Mexico	Tabasco			18.5409	-92.6328
399	JMC_1400	Wild_MII	5	CICY	Wild	Mexico	Chiapas			16.8641	-91.9855
400	JMC_1401	Wild_MII	5	CICY	Wild	Mexico	Chiapas			15.74	-92.2554
401	JMC_1402	Wild_MII	5	CICY	Wild	Mexico	Chiapas			15.6937	-92.2218
402	JMC_1404	Wild_MII	5	CICY	Wild	Mexico	Chiapas			14.8828	-92.3058
403	JMC_1405	Wild_MII	5	CICY	Wild	Mexico	Chiapas			14.8461	-92.3376
404	JMC_1406	Wild_MII	5	CICY	Wild	Mexico	Chiapas			14.8048	-92.3596
405	JMC_1407	Wild_MII	5	CICY	Wild	Mexico	Chiapas			14.7423	-92.3324
406	JMC_1408	Wild_MII	5	CICY	Wild	Mexico	Chiapas			14.7073	-92.2958
407	JMC_1409	Wild_MII	5	CICY	Wild	Mexico	Chiapas
408	JMC_1410	Wild_MII	5	CICY	Wild	Mexico	Chiapas			14.6754	-92.278
409	JMC_1411	Wild_MII	5	CICY	Wild	Mexico	Chiapas			14.8135	-92.1928
410	JMC_1412	Wild_MII	5	CICY	Wild	Mexico	Chiapas			15.6455	-92.1425
411	JMC_1413	Wild_admixed	5	CICY	Wild	Mexico	Chiapas			16.3085	-92.4195
412	JMC_1416	Wild_MII	5	CICY	Wild	Mexico	Quintana Roo			19.4092	-88.1018
413	JMC_1417	Wild_MII	5	CICY	Wild	Mexico	Quintana Roo			19.4186	-88.1419
414	JMC_1418	Wild_MII	5	CICY	Wild	Mexico	Quintana Roo			19.3968	-88.1362
415	JMC_1420	Wild_admixed	5	CICY	Wild	Mexico	Campeche			18.6487	-90.2885
416	JMC_1421	Wild_MII	5	CICY	Wild	Mexico	Veracruz			18.2003	-96.1099
417	JMC_1422	Wild_MII	5	CICY	Wild	Mexico	Veracruz			18.1288	-95.6567
418	JMC_221	Wild_MII	5	CICY	Wild	Mexico	Yucatán			20.525	-88.1233
419	JMC_277	Dom_MI	2	CICY	Domesticated	Mexico	Yucatán	Tixcacalcupul		20.3293	-88.1848
420	JMC_549	Wild_MII	5	CICY	Wild	Mexico	Yucatán			20.2108	-89.3691
421	JMC_580-COR	Wild_MII	5	CICY	Wild	Mexico	Yucatán		50	20.0623	-89.4159
422	JMC_609	Wild_MII	5	CICY	Wild	Mexico	Yucatán		21	20.209	-89.369
423	JMC_715	Wild_admixed	5	CICY	Wild	Mexico	Campeche			20.0217	-89.7278
424	JMC_778	Wild_MII	5	CICY	Wild	Mexico	Campeche			19.4142	-89.5742
425	JMC_9	Dom_MI	2	CICY	Domesticated	Mexico	Quintana Roo		25
426	JMC_922-COR	Wild_MII	5	CICY	Wild	Mexico	Campeche		130	19.9476	-89.7342
427	JMC_995	Dom_MI	2	CICY	Domesticated	Mexico	Yucatán		40	20.8911	-88.1364
428	ROL_167	Wild_MI	4	CICY	Wild	Mexico	Jalisco			20.7333	-103.5
429	ROL_178	Wild_MI	4	CICY	Wild	Mexico	Nayarit			21.8333	-105.133
430	ROL_224-COR	Wild_MI	4	CICY	Wild	Mexico	Jalisco		1472	20.8347	-103.967
431	ROL_341	Wild_MI	4	CICY	Wild	Mexico	Colima			19.0833	-104.283
432	ROL_348	Wild_MI	4	CICY	Wild	Mexico	Jalisco			20.8667	-103.833
433	ROL_359	Wild_MI	4	CICY	Wild	Mexico	Nayarit			21.9	-105.25
434	ROL_407	Wild_admixed	4	CICY	Wild	Mexico	Colima			19.4	-103.633
435	ROL_428	Wild_MI	4	CICY	Wild	Mexico	Jalisco			19.3169	-104.883
436	ROL_448	Wild_admixed	4	CICY	Wild	Mexico	Nayarit			21.3667	-104.567
437	ROL_460	Wild_MI	4	CICY	Wild	Mexico	Nayarit			21.35	-104.567
438	ROL_464	Wild_admixed	4	CICY	Wild	Mexico	Jalisco		1317	20.65	-103.717
439	ROL_503	Wild_MI	4	CICY	Wild	Mexico	Michoacán			19.35	-102.067
440	ROL_506	Wild_MI	4	CICY	Wild	Mexico	Michoacán			19.2167	-102.033
441	ROL_511	Wild_MI	4	CICY	Wild	Mexico	Jalisco			19.35	-104.883
442	ROL_513	Wild_MI	4	CICY	Wild	Mexico	Jalisco			19.6	-104.483
443	ROL_528	Wild_admixed	4	CICY	Wild	Mexico	Nayarit			21.7833	-105.083
444	ROL_535	Wild_MI	4	CICY	Wild	Mexico	Jalisco			20.6333	-104.85
445	ROL_542	Wild_MI	4	CICY	Wild	Mexico	Jalisco			19.4667	-104.65
446	ROL_543	Wild_MI	4	CICY	Wild	Mexico	Jalisco			19.4	-104.667
447	ROL_544	Wild_MI	4	CICY	Wild	Mexico	Jalisco			19.3	-104.7
448	ROL_546	Wild_MI	4	CICY	Wild	Mexico	Jalisco			19.2167	-104.7
449	ROL_547	Wild_MI	4	CICY	Wild	Mexico	Jalisco			19.5833	-105.083
450	ROL_549	Wild_MI	4	CICY	Wild	Mexico	Jalisco			19.8667	-105.317
451	ROL_551	Wild_MI	4	CICY	Wild	Mexico	Jalisco			20.7	-104.883
452	ROL_552	Wild_MI	4	CICY	Wild	Mexico	Jalisco			20.4833	-105.283
453	ROL_553	Wild_MI	4	CICY	Wild	Mexico	Jalisco			20.7167	-105.183
454	ROL_554	Wild_admixed	4	CICY	Wild	Mexico	Jalisco			20.7	-104.883
455	ROL_555	Wild_MI	4	CICY	Wild	Mexico	Nayarit			21.3	-105.15
456	ROL_557	Wild_MI	4	CICY	Wild	Mexico	Nayarit			21.4167	-105.167
457	ROL_559	Wild_MI	4	CICY	Wild	Mexico	Nayarit			21.5167	-105.217
458	ROL_560	Wild_MI	4	CICY	Wild	Mexico	Michoacán			18.5833	-103.5
459	UDG-CICY_1	Wild_MI	4	CICY	Wild	Mexico	Guerrero			17.9932	-102.034
460	UDG-CICY_10	Wild_MI	4	CICY	Wild	Mexico	Nayarit			21.4639	-104.811
461	UDG-CICY_11	Wild_MI	4	CICY	Wild	Mexico	Nayarit			21.5296	-105.246
462	UDG-CICY_12	Wild_MI	4	CICY	Wild	Mexico	Nayarit			21.5461	-104.811
463	UDG-CICY_13	Wild_MI	4	CICY	Wild	Mexico	Nayarit			21.5631	-105.275
464	UDG-CICY_14	Wild_MI	4	CICY	Wild	Mexico	Nayarit			21.8836	-105.157
465	UDG-CICY_15	Wild_admixed	4	CICY	Wild	Mexico	Nayarit			21.9449	-105.219
466	UDG-CICY_16	Wild_MI	4	CICY	Wild	Mexico	Nayarit			22.3026	-105.278
467	UDG-CICY_17	Wild_MI	4	CICY	Wild	Mexico	Nayarit			22.4634	-105.376
468	UDG-CICY_18	Wild_MI	4	CICY	Wild	Mexico	Nayarit			22.5299	-105.443
469	UDG-CICY_19	Wild_MI	4	CICY	Wild	Mexico	Sinaloa			22.5606	-105.584
470	UDG-CICY_2	Wild_MI	4	CICY	Wild	Mexico	Michoacán			18.0303	-102.317
471	UDG-CICY_20	Wild_MI	4	CICY	Wild	Mexico	Sinaloa			23.285	-106.069
472	UDG-CICY_21	Wild_MI	4	CICY	Wild	Mexico	Sinaloa			23.2414	-106.133
473	UDG-CICY_22	Wild_MI	4	CICY	Wild	Mexico	Sinaloa			23.166	-106.107
474	UDG-CICY_23	Wild_MI	4	CICY	Wild	Mexico	Sinaloa			23.0234	-105.92
475	UDG-CICY_24	Wild_MI	4	CICY	Wild	Mexico	Sinaloa			22.917	-105.814
476	UDG-CICY_3	Wild_MI	4	CICY	Wild	Mexico	Michoacán			18.0171	-102.358
477	UDG-CICY_4	Wild_MI	4	CICY	Wild	Mexico	Michoacán			18.0215	-102.476
478	UDG-CICY_5	Wild_MI	4	CICY	Wild	Mexico	Michoacán			18.0488	-102.567
479	UDG-CICY_6	Wild_MI	4	CICY	Wild	Mexico	Michoacán			18.1063	-102.567
480	UDG-CICY_7	Wild_MI	4	CICY	Wild	Mexico	Michoacán			18.1428	-102.894
481	UDG-CICY_8	Wild_MI	4	CICY	Wild	Mexico	Michoacán			18.015	-102.342
482	UDG-CICY_9	Wild_MI	4	CICY	Wild	Mexico	Guerrero			17.6582	-101.576
